# 1 An estimate of the deepest branches of the tree of 2 life from ancient vertically-evolving genes

3  
4 Edmund R. R. Moody<sup>1</sup>, Tara A. Mahendrarajah<sup>2</sup>, Nina Dombrowski<sup>2</sup>, James W. Clark<sup>1</sup>, Celine  
5 Petitjean<sup>1</sup>, Pierre Offre<sup>2</sup>, Gergely J. Szöllősi<sup>3,4,5</sup>, Anja Spang<sup>2,6\*</sup>, Tom A. Williams<sup>1\*</sup>  
6

- 7 1. School of Biological Sciences, University of Bristol, Bristol BS8 1TH, UK.  
8 2. NIOZ, Royal Netherlands Institute for Sea Research, Department of Marine Microbiology  
9 and Biogeochemistry; AB Den Burg, The Netherlands  
10 3. Dept. of Biological Physics, Eötvös Loránd University, 1117 Budapest, Hungary  
11 4. MTA-ELTE “Lendület” Evolutionary Genomics Research Group, 1117 Budapest, Hungary;  
12 5. Institute of Evolution, Centre for Ecological Research, 1121 Budapest, Hungary  
13 6. Department of Cell- and Molecular Biology, Science for Life Laboratory, Uppsala  
14 University, SE-75123, Uppsala, Sweden  
15

16 \*Co-corresponding authors: [tom.a.williams@bristol.ac.uk](mailto:tom.a.williams@bristol.ac.uk), [anja.spang@nioz.nl](mailto:anja.spang@nioz.nl)  
17

## 18 Abstract

19  
20 Core gene phylogenies provide a window into early evolution, but different gene sets and  
21 analytical methods have yielded substantially different views of the tree of life. Trees inferred from  
22 a small set of universal core genes have typically supported a long branch separating the archaeal  
23 and bacterial domains. By contrast, recent analyses of a broader set of non-ribosomal genes have  
24 suggested that Archaea may be less divergent from Bacteria, and that estimates of inter-domain  
25 distance are inflated due to accelerated evolution of ribosomal proteins along the inter-domain  
26 branch. Resolving this debate is key to determining the diversity of the archaeal and bacterial  
27 domains, the shape of the tree of life, and our understanding of the early course of cellular  
28 evolution. Here, we investigate the evolutionary history of the marker genes key to the debate.  
29 We show that estimates of a reduced Archaea-Bacteria (AB) branch length result from inter-  
30 domain gene transfers and hidden paralogy in the expanded marker gene set. By contrast,  
31 analysis of a broad range of manually curated marker gene datasets from an evenly sampled set  
32 of 700 Archaea and Bacteria reveal that current methods likely underestimate the AB branch  
33 length due to substitutional saturation and poor model fit; that the best-performing phylogenetic  
34 markers tend to support longer inter-domain branch lengths; and that the AB branch lengths of  
35 ribosomal and non-ribosomal marker genes are statistically indistinguishable. Furthermore, our  
36 phylogeny inferred from the 27 highest-ranked marker genes recovers a clade of DPANN at the  
37 base of the Archaea, and places CPR within Bacteria as the sister group to the Chloroflexota.  
38

## 39 Introduction

40  
41 Much remains unknown about the earliest period of cellular evolution and the deepest  
42 divergences in the tree of life. Phylogenies encompassing both Archaea and Bacteria have been  
43 inferred from a “universal core” set of 16-56 genes encoding proteins involved in translation and

44 other aspects of the genetic information processing machinery (Ciccarelli et al., 2006; Fournier  
45 and Gogarten, 2010; Harris et al., 2003; Hug et al., 2016; Koonin, 2003; Mukherjee et al., 2017;  
46 Petitjean et al., 2014; Ramulu et al., 2014; Raymann et al., 2015; Theobald, 2010; Williams et al.,  
47 2020). While representing a small fraction of the total genome of any organism (Dagan and Martin,  
48 2006), these genes are thought to predominantly evolve vertically and are thus best-suited for  
49 reconstructing the tree of life (Ciccarelli et al., 2006; Creevey et al., 2011; Puigbò et al., 2009;  
50 Ramulu et al., 2014; Theobald, 2010). In these analyses, the branch separating Archaea from  
51 Bacteria (hereafter, the AB branch) is often the longest internal branch in the tree (Cox et al.,  
52 2008; Gogarten et al., 1989; Hug et al., 2016; Iwabe et al., 1989; Pühler et al., 1989; Williams et  
53 al., 2020). In molecular phylogenetics, branch lengths are usually measured in expected numbers  
54 of substitutions per site, with a long branch corresponding to a greater degree of genetic change.  
55 Long branches can therefore result from high evolutionary rates, long periods of absolute time, or  
56 a combination of the two. If a sufficient number of fossils are available for calibration, molecular  
57 clock models can, in principle, disentangle the contributions of these effects. However, limited  
58 fossil data (Sugitani et al., 2015) is currently available to calibrate early divergences in the tree of  
59 life (Betts et al., 2018; Horita and Berndt, 1999; Lepland et al., 2002; van Zuilen et al., 2002), and  
60 as a result, the ages and evolutionary rates of the deepest branches of the tree remain highly  
61 uncertain.

62  
63 Recently, Zhu et al. (Zhu et al., 2019) inferred a phylogeny from 381 genes distributed across  
64 Archaea and Bacteria using the supertree method ASTRAL (Mirarab et al., 2014). These markers  
65 increase the total number of genes compared to other universal marker sets and comprise not  
66 only proteins involved in information processing but also proteins affiliated with most other  
67 functional COG categories, including metabolic processes (Supplementary File 1). The genetic  
68 distance (AB branch length) between the domains (Zhu et al., 2019) was estimated from a  
69 concatenation of the same marker genes, resulting in a much shorter AB branch length than  
70 observed with the core universal markers (Hug et al., 2016; Williams et al., 2020). These analyses  
71 were consistent with the hypothesis (Petitjean et al., 2014; Zhu et al., 2019) that the apparent  
72 deep divergence of Archaea and Bacteria might be the result of an accelerated evolutionary rate  
73 of genes encoding translational and in particular ribosomal proteins along the AB branch as  
74 compared to other genes. Interestingly, the same observation was made previously using a  
75 smaller set of 38 non-ribosomal marker proteins (Petitjean et al., 2014), although the difference  
76 in AB branch length between ribosomal and non-ribosomal markers in that analysis was reported  
77 to be substantially lower (roughly two-fold, compared to roughly ten-fold for the 381 protein set  
78 (Petitjean et al., 2014; Zhu et al., 2019)).

79  
80 A higher evolutionary rate of ribosomal genes might result from the accumulation of compensatory  
81 substitutions at the interaction surfaces among the protein subunits of the ribosome (Petitjean et  
82 al., 2014; Valas and Bourne, 2011), or as a compensatory response to the addition or removal of  
83 ribosomal subunits early in evolution (Petitjean et al., 2014). Alternatively, differences in the  
84 inferred AB branch length might result from varying rates or patterns of evolution between the  
85 traditional core genes (Spang et al., 2015; Williams et al., 2020) and the expanded set (Zhu et  
86 al., 2019). Substitutional saturation (multiple substitutions at the same site (Jeffroy et al., 2006))  
87 and across-site compositional heterogeneity can both impact the inference of tree topologies and  
88 branch lengths (Foster, 2004; Lartillot et al., 2007; Lartillot and Philippe, 2004; Quang et al., 2008;  
89 Wang et al., 2008; Williams et al., 2021). These difficulties are particularly significant for ancient  
90 divergences (Gouy et al., 2015). Failure to model site-specific amino acid preferences has  
91 previously been shown to lead to under-estimation of the AB branch length due to a failure to

92 detect convergent changes (Tourasse and Gouy, 1999; Williams et al., 2020), although the  
93 published analysis of the 381 marker set did not find evidence of a substantial impact of these  
94 features on the tree as a whole (Zhu et al., 2019). Those analyses also identified phylogenetic  
95 incongruence among the 381 markers, but did not determine the underlying cause (Zhu et al.,  
96 2019).

97

98 This recent work (Zhu et al., 2019) raises two important issues regarding the inference of the  
99 universal tree: first, that estimates of the genetic distance between Archaea and Bacteria from  
100 classic “core genes” may not be representative of ancient genomes as a whole, and second, that  
101 there may be many more suitable genes to investigate early evolutionary history than generally  
102 recognized, providing an opportunity to improve the precision and accuracy of deep phylogenies.  
103 Here, we investigate these issues in order to determine how different methodologies and marker  
104 sets affect estimates of the evolutionary distance between Archaea and Bacteria. First, we  
105 examine the evolutionary history of the 381 gene marker set (hereafter, the expanded marker  
106 gene set) and identify several features of these genes, including instances of inter-domain gene  
107 transfers and mixed paralogy, that may contribute to the inference of a shorter AB branch length  
108 in concatenation analyses. Then, we re-evaluate the marker gene sets used in a range of previous  
109 analyses to determine how these and other factors, including substitutional saturation and model  
110 fit, contribute to inter-domain branch length estimations and the shape of the universal tree.  
111 Finally, we identify a subset of marker genes least affected by these issues, and use these to  
112 estimate an updated tree of the primary domains of life and the length of the stem branch that  
113 separates Archaea and Bacteria.

## 114 Results and Discussion

115

### 116 ***Genes from the expanded marker set are not widely distributed in Archaea***

117

118 The 381 gene set was derived from a larger set of 400 genes used to estimate the phylogenetic  
119 placement of new lineages as part of the PhyloPhlAn method (Segata et al., 2013) and applied  
120 to a taxonomic selection that included 669 Archaea and 9906 Bacteria (Zhu et al., 2019). Perhaps  
121 reflecting the focus on Bacteria in the original application, the phylogenetic distribution of the 381  
122 marker genes in the expanded set varies substantially (Supplementary File 1), with many being  
123 poorly represented in Archaea. Specifically, 41% of the published gene trees  
124 (<https://biocore.github.io/wol/> (Zhu et al., 2019)) contain less than 25% of the sampled archaea,  
125 with 14 and 68 of these trees including zero or  $\leq 10$  archaeal homologues, respectively. Across all  
126 of the gene trees, archaeal homologues comprise 0-14.8% of the dataset (Supplementary File 1).  
127 Manual inspection of subsampled versions of these gene trees suggested that 317/381 did not  
128 possess an unambiguous branch separating the archaeal and bacterial domains (Supplementary  
129 File 1). These distributions suggest that many of these genes are not broadly present in both  
130 domains, and that some might be specific to Bacteria.

131

### 132 ***Conflicting evolutionary histories of individual marker genes and the inferred species tree***

133

134 In the published analysis of the 381 gene set (Zhu et al., 2019), the tree topology was inferred  
135 using the supertree method ASTRAL (Mirarab et al., 2014), with branch lengths inferred on this  
136 fixed tree from a marker gene concatenation (Zhu et al., 2019). The topology inferred from this  
137 expanded marker set (Zhu et al., 2019) is similar to previous trees (Castelle and Banfield, 2018;  
138 Hug et al., 2016) and recovers Archaea and Bacteria as reciprocally monophyletic domains, albeit  
139 with a shorter AB branch than in earlier analyses. However, the individual gene trees (Zhu et al.,  
140 2019) differ regarding domain monophyly: Archaea and Bacteria are recovered as reciprocally  
141 monophyletic groups in only 22 of the 381 published (Zhu et al., 2019) maximum likelihood (ML)  
142 gene trees of the expanded marker set (Supplementary File 1).

143

144 Since single gene trees often fail to strongly resolve ancient relationships, we used approximately-  
145 unbiased (AU) tests (Shimodaira, 2002) to evaluate whether the failure to recover domain  
146 monophyly in the published ML trees is statistically supported. For computational tractability, we  
147 performed these analyses on a 1000-species subsample of the full 10,575-species dataset that  
148 was compiled in the original study (Zhu et al., 2019). For 79 of the 381 genes, we could not  
149 perform the test because the gene family did not contain any archaeal homologues (56 genes),  
150 or contained only one archaeal homologue (23 genes); in total, the 1000-species sample included  
151 74 archaeal genomes. For the remaining 302 genes, domain monophyly was rejected at the 5%  
152 significance level (with Bonferroni correction,  $p < 0.0001656$ ) for 151 out of 302 (50%) genes. As  
153 a comparison, we performed the same test on several smaller marker sets used previously to  
154 infer a tree of life (Coleman et al., 2021; Petitjean et al., 2014; Williams et al., 2020); none of the  
155 markers in those sets rejected reciprocal domain monophyly ( $p < 0.05$  for all genes, with  
156 Bonferroni correction: Coleman:  $>0.001724$ , Petitjean:  $>0.001316$ , Williams:  $>0.00102$ : Figure  
157 1A). In what follows, we refer to four published marker gene sets as: i) the Expanded set (381  
158 genes (Zhu et al., 2019)), ii) the Core set (49 genes (Williams et al., 2020), encoding ribosomal  
159 proteins and other conserved information-processing functions; itself a consensus set of several  
160 earlier studies (Da Cunha et al., 2017; Spang et al., 2015; Williams et al., 2012)), iii) the Non-

161 ribosomal set (38 genes, broadly distributed and explicitly selected to avoid genes encoding  
162 ribosomal proteins (Petitjean et al., 2014)), and iv) the Bacterial set (29 genes used in a recent  
163 analysis of bacterial phylogeny (Coleman et al., 2021)).

164  
165 To investigate why 151 of the marker genes rejected the reciprocal monophyly of Archaea and  
166 Bacteria, we returned to the full dataset (Zhu et al., 2019), annotated each sequence in each  
167 marker gene family by assigning proteins to KOs, Pfams, and Interpro domains, among others  
168 (Supplementary File 1, see Methods for details) and manually inspected the tree topologies  
169 (Supplementary File 1). This revealed that the major cause of domain polyphyly observed in gene  
170 trees was inter-domain gene transfer (in 359 out of 381 gene trees (94.2%)) and mixing of  
171 sequences from distinct paralogous families (in 246 out of 381 gene trees (64.6%)). For instance,  
172 marker genes encoding ABC-type transporters (p0131, p0151, p0159, p0174, p0181, p0287,  
173 p0306, p0364), tRNA synthetases (i.e. p0000, p0011, p0020, p0091, p0094, p0202),  
174 aminotransferases and dehydratases (i.e. p0073/4-aminobutyrate aminotransferase; p0093/3-  
175 isopropylmalate dehydratase) often comprised a mixture of paralogues.

176  
177 Together, these analyses indicate that the evolutionary histories of the individual markers of the  
178 expanded set differ from each other and from the species tree. The original study investigated  
179 and acknowledged (Zhu et al., 2019) the varying levels of congruence between the marker  
180 phylogenies and the species tree, but did not investigate the underlying causes. Our analyses  
181 establish the basis for these disagreements in terms of gene transfers and the mixing of  
182 orthologues and paralogues within and between domains. The estimation of genetic distance  
183 based on concatenation relies on the assumption that all of the genes in the supermatrix evolve  
184 on the same underlying tree; genes with different gene tree topologies violate this assumption  
185 and should not be concatenated because the topological differences among sites are not  
186 modelled, and so the impact on inferred branch lengths is difficult to predict. In practice, it is often  
187 difficult to be certain that all of the markers in a concatenate share the same gene tree topology,  
188 and the analysis proceeds on the hypothesis that a small proportion of discordant genes are not  
189 expected to seriously impact the inferred tree. However, the concatenated tree inferred from the  
190 expanded marker set differs from previous trees in that the genetic distance between Bacteria  
191 and Archaea is greatly reduced, such that the AB branch length appears comparable to distances  
192 among bacterial phyla (Zhu et al., 2019). Because an accurate estimate of the AB branch length  
193 has a major bearing on unanswered questions regarding the root of the universal tree (Gouy et  
194 al., 2015), we next evaluated the impact of the conflicting gene histories within the expanded  
195 marker set on inferred AB branch length.

196  
197 ***The inferred branch length between Archaea and Bacteria is shortened by inter-domain***  
198 ***gene transfer and hidden paralogy***

199  
200 To investigate the impact of gene transfers and mixed paralogy on the AB branch length inferred  
201 by gene concatenations (Zhu et al., 2019), we compared branch lengths estimated from markers  
202 on the basis of whether or not they rejected domain monophyly in the expanded marker set  
203 (Figure 1A). To estimate AB branch lengths for genes in which the domains were not  
204 monophyletic in the ML tree, we first performed a constrained ML search to find the best gene  
205 tree that was consistent with domain monophyly for each family under the LG+G4+F model in IQ-  
206 TREE 2 (Minh et al., 2020). While it may seem strained to estimate the length of a branch that  
207 does not appear in the ML tree, we reasoned that this approach would provide insight into the  
208 contribution of these genes to the AB branch length in the concatenation, in which they conflict

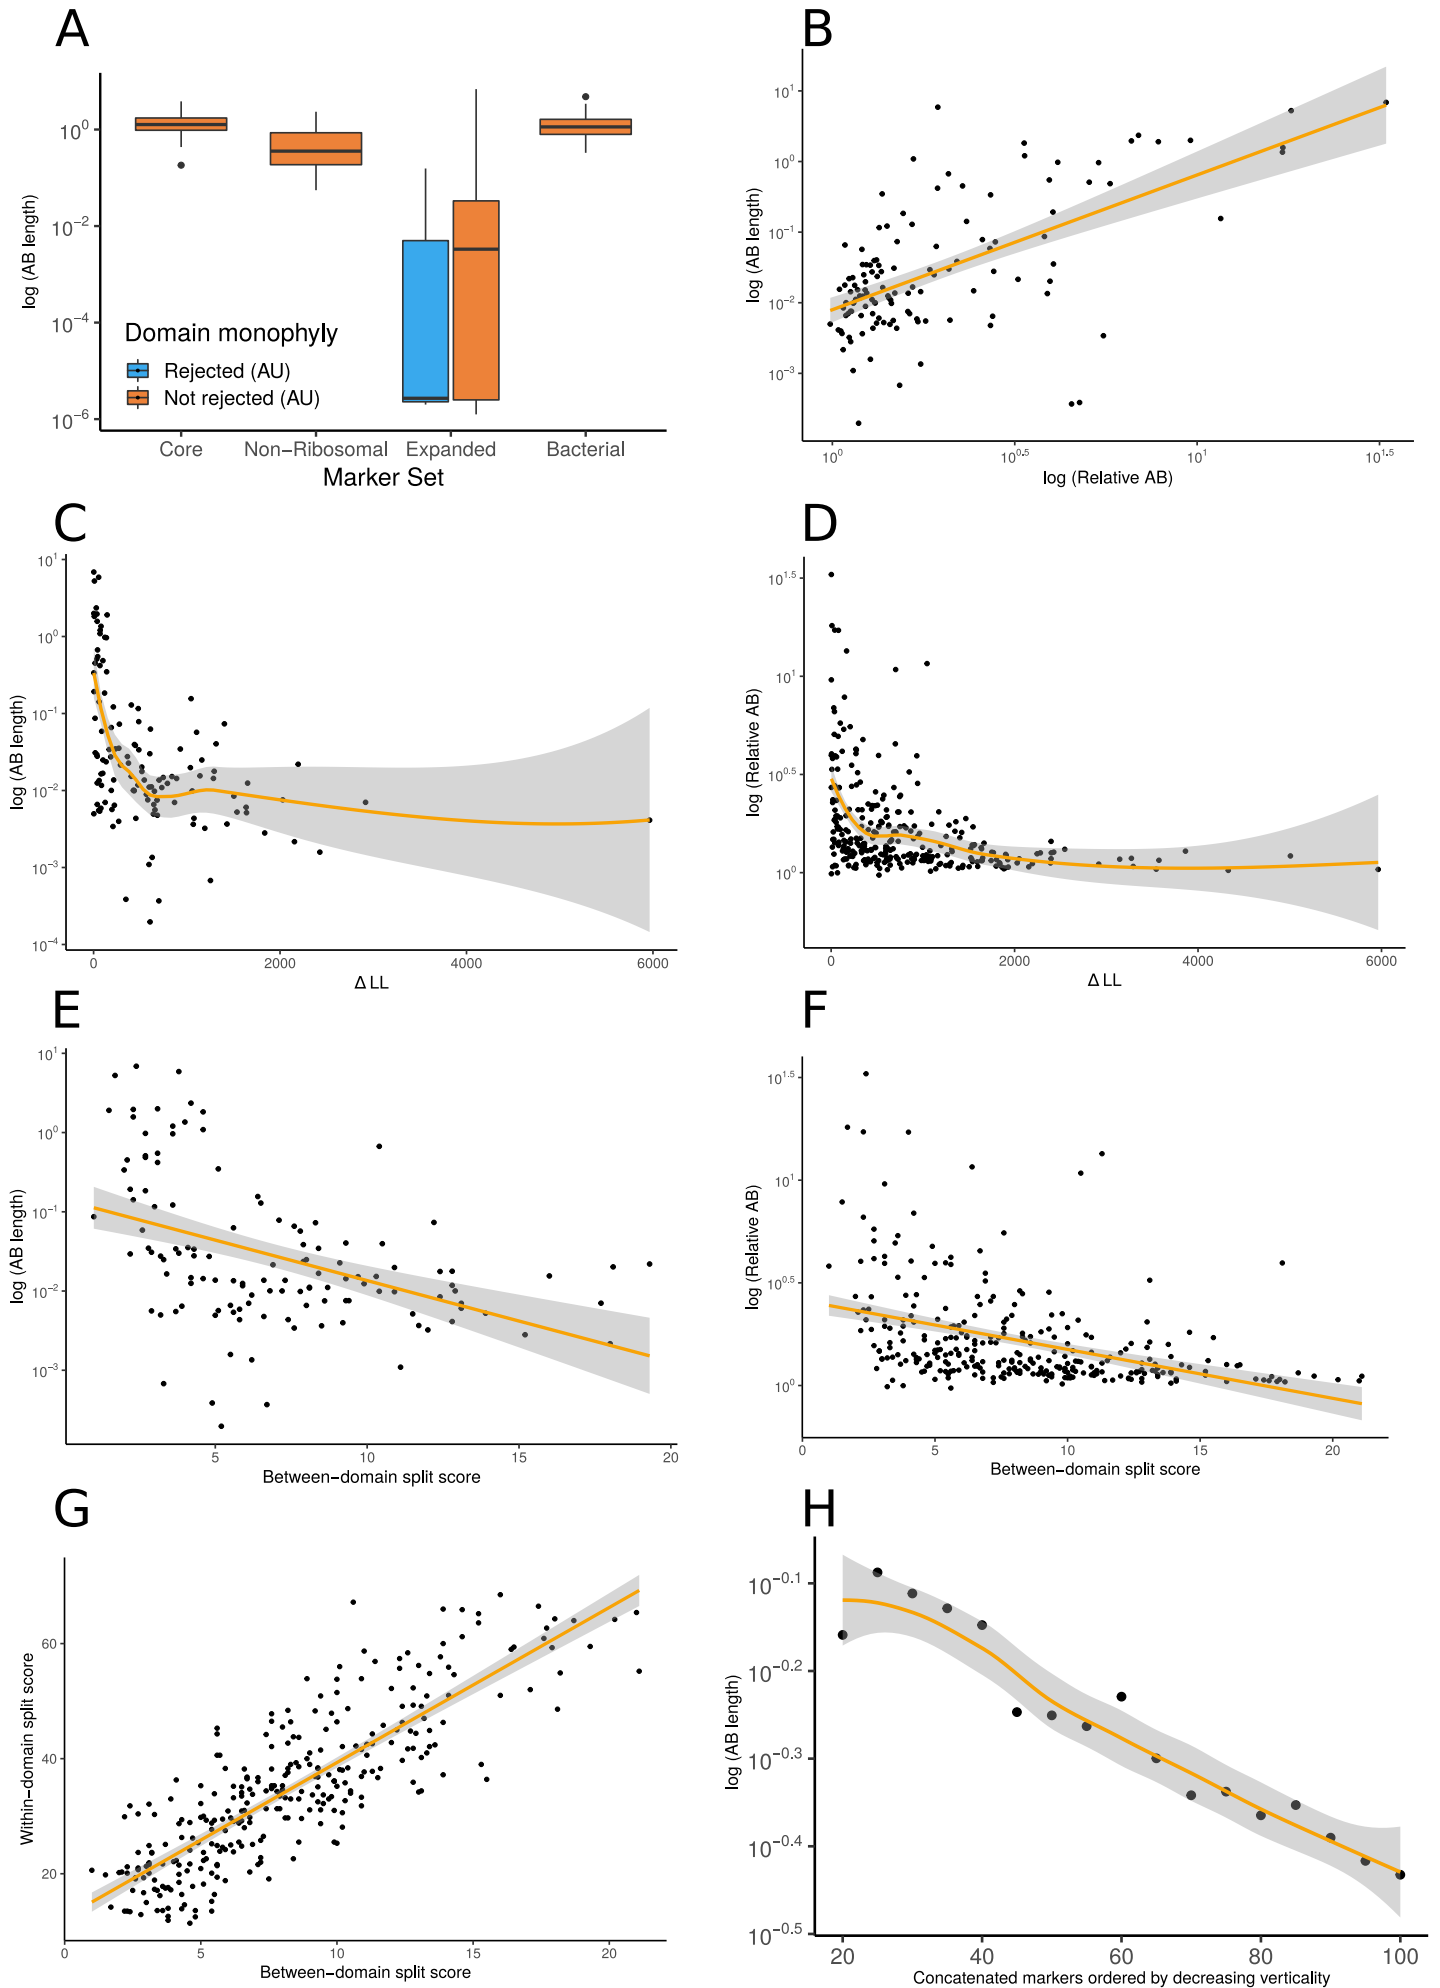

**Figure 1: Vertically-evolving marker genes support a greater evolutionary distance between Archaea and Bacteria.** (A) Expanded set genes that reject domain monophyly ( $P < 0.05$ , AU test, with Bonferroni correction (see main text) support significantly shorter AB branch lengths when constrained to follow a domain monophyletic tree ( $p = 3.653 \times 10^{-6}$ , Wilcoxon rank-sum test). None of the marker genes from several other published analyses significantly reject domain monophyly (Bonferroni-corrected  $p < 0.05$ , AU test) for all genes tested, consistent with vertical inheritance from LUCA to the last common ancestors of Archaea and Bacteria. (B) Two measures of evolutionary proximity (Zhu et al., 2019), AB branch length and relative AB distance, are positively correlated ( $R = 0.7426499$ ,  $p < 2.2 \times 10^{-16}$ ). We considered two complementary proxies of marker gene verticality:  $\Delta LL$  (C: against AB branch length, D: against relative AB length), which reflects the degree to which marker genes reject domain monophyly (C:  $P = 0.009013$  &  $R = -0.2317894$ , D:  $p = 0.0001051$  &  $R = -0.2213292$ ); and the between-domain split score (E: against AB branch length, F: against relative AB length), which quantifies the extent to which marker genes recover monophyletic Archaea and Bacteria; a higher split score (see Methods) indicates the splitting of domains into multiple gene tree clades due to gene transfer, reciprocal sorting-out of paralogues or lack of phylogenetic resolution (E:  $p = 0.0005304$  &  $R = -0.3043537$ , F:  $p = 2.572 \times 10^{-6}$  &  $R = -0.2667739$ ). We also considered a split score based on within-domain relationships (G); between- and within-domain split scores are positively correlated:  $R = 0.836679$ ,  $P < 2.2 \times 10^{-16}$ , Pearson's correlation), indicating that markers which recover Archaea and Bacteria as monophyletic also tend to recover established within-domain relationships. (H) Inferred AB length decreases as marker genes of lower verticality (larger  $\Delta LL$ ) are added to the concatenate. Marker genes were sorted by  $\Delta LL$ , the difference in log-likelihood between the maximum likelihood gene family tree under a free topology search and the log-likelihood of the best tree constrained to obey domain monophyly. Note that 79/381 expanded set markers had zero or one archaea in the 1000-species subsample and so could not be included in these analyses; of the remaining 302 markers, 176 have AB branch lengths very close to 0 in the constraint tree (as seen in panel (A)). In these plots, we removed all markers with an AB branch length of  $< 0.00001$ ; see Figure 1-Figure Supplements 1-13 for all plots. Non-linear trendlines were estimated using LOESS regression.

209 with the overall topology. AB branch lengths were significantly ( $p = 3.653 \times 10^{-6}$ , Wilcoxon rank  
210 sum test) shorter for markers that rejected domain monophyly (Bonferroni-corrected  $p <$   
211  $0.0001656$ ; Figure 1A): mean AB branch length was  $0.00668$  substitutions/site for markers that  
212 significantly rejected domain monophyly, and  $0.287$  substitutions/site for markers that did not  
213 reject domain monophyly). This behaviour might result from marker gene transfers reducing the  
214 number of fixed differences between the domains, so that the AB branch length in a tree in which  
215 Archaea and Bacteria are constrained to be reciprocally monophyletic will tend towards 0 as the  
216 number of transfers increases.

217  
218 To test the hypothesis that phylogenetic incongruence among markers might reduce the inferred  
219 Archaea-Bacteria distance, we evaluated the relationship between AB distance and two  
220 complementary metrics of marker gene verticality:  $\Delta LL$ , the difference in log likelihood between  
221 the constrained ML tree and the ML gene tree (a proxy for the extent to which a marker gene  
222 rejects the reciprocal monophyly of Bacteria and Archaea) and the “split score” (Dombrowski et  
223 al., 2020), which measures the extent to which marker genes recover established relationships  
224 for defined taxonomic levels of interest (for example, at the level of domain, phylum or order),  
225 averaging over bootstrap distributions of gene trees to account for phylogenetic uncertainty (see  
226 Methods). We evaluated split scores at both the between-domain and within-domain (Figure 1-  
227 Figure Supplements 1-13) levels.  $\Delta LL$  and between-domain split score were positively correlated  
228 with each other (Figure 1-Figure Supplement 4) and negatively correlated with both AB stem  
229 length (Figure 1C,E) and relative AB distance (Figure 1D,F), an alternative metric (Zhu et al.  
230 (2019)) that compares average tip-to-tip distances within and between domains. Interestingly,  
231 between-domain and within-domain split scores were strongly positively correlated (Figure 1G),  
232 and the same relationships between within-domain split score, AB branch length and relative AB  
233 distance were observed (Figure 1-Figure Supplements 11,12). Overall, these results suggest that  
234 genes that recover the reciprocal monophyly of Archaea and Bacteria also evolve more vertically  
235 within each domain, and that these vertically-evolving marker genes support a longer AB branch  
236 and a greater AB distance. Consistent with this inference, AB branch lengths estimated using  
237 concatenation decreased as increasing numbers of low-verticality markers (that is, markers with  
238 higher  $\Delta LL$ ) were added to the concatenate (Figure 1H). These results suggest that inter-domain  
239 gene transfers reduce the AB branch length when included in a concatenation.

240  
241 An alternative explanation for the positive relationship between marker gene verticality and AB  
242 branch length could be that vertically-evolving genes experience higher rates of sequence  
243 evolution. For a set of genes that originate at the same point on the species tree, the mean root-  
244 to-tip distance (measured in substitutions per site, for gene trees rooted using the MAD method  
245 (Tria et al., 2017)) provides a proxy of evolutionary rate. Mean root-to-tip distances were  
246 significantly positively correlated with  $\Delta LL$  and between-domain split score ( $\Delta LL$ :  $R = 0.1397803$ ,  
247  $p = 0.01506$ , split score:  $R = 0.1705415$   $p = 0.002947$ ; Figure 1-Figure Supplement 5,6, indicating  
248 that vertically-evolving genes evolve relatively slowly (note that large values of  $\Delta LL$  and split score  
249 denote low verticality). Thus, the longer AB branches of vertically-evolving genes do not appear  
250 to result from a faster evolutionary rate for these genes. Taken together, these results indicate  
251 that the inclusion of genes that do not support the reciprocal monophyly of Archaea and Bacteria,  
252 or their constituent taxonomic ranks, in the universal concatenate explain the reduced estimated  
253 AB branch length.

254



## 255 ***Finding ancient vertically-evolving genes***

256  
257 To estimate the AB branch length and the phylogeny of prokaryotes using a dataset that resolves  
258 some of the issues identified above, we performed a meta-analysis of several previous studies to  
259 identify a consensus set of vertically-evolving marker genes. We identified unique markers from  
260 these analyses by reference to the COG ontology (Supplementary File 2, Dombrowski et al.,  
261 2020; Galperin et al., 2019), extracted homologous sequences from a representative sample of  
262 350 archaeal and 350 bacterial genomes (Supplementary File 3), and performed iterative  
263 phylogenetics and manual curation to obtain a set of 54 markers that recovered archaeal and  
264 bacterial monophyly (see Methods). Prior to manual curation, non-ribosomal markers had a  
265 greater number of HGTs and cases of mixed paralogy. In particular, for the original set of 95  
266 unique COG families (see ‘Phylogenetic analyses’ in Methods), we rejected 41 families based on  
267 the inferred ML trees, either due to a large degree of HGT, paralogous gene families or LBA. For  
268 the remaining 54 markers, the ML trees contained evidence of occasional recent HGT events.  
269 Strict monophyly was violated in 69% of the non-ribosomal and 29% of the ribosomal families.  
270 We manually removed the individual sequences which violated domain monophyly before re-  
271 alignment, trimming, and subsequent tree inference (see Methods). These results imply that  
272 manual curation of marker genes is important for deep phylogenetic analyses, particularly when  
273 using non-ribosomal markers. Comparison of within-domain split scores for these 54 markers  
274 (Supplementary File 4) indicated that markers that better resolved established relationships within  
275 each domain also supported a longer AB branch length (Figure 2A).

## 276 277 ***Distributions of AB branch lengths for ribosomal and non-ribosomal marker genes are*** 278 ***similar***

279  
280 Traditional universal marker sets include many ribosomal proteins (Ciccarelli et al., 2006; Fournier  
281 and Gogarten, 2010; Harris et al., 2003; Hug et al., 2016; Liu et al., 2021; Williams et al., 2020).  
282 If ribosomal proteins experienced accelerated evolution during the divergence of Archaea and  
283 Bacteria, this might lead to the inference of an artifactually long AB branch length (Petitjean et al.,  
284 2014; Zhu et al., 2019). To investigate this, we plotted the inter-domain branch lengths for the 38  
285 and 16 ribosomal and non-ribosomal genes, respectively, comprising the 54 marker genes set.  
286 We found no evidence that there was a longer AB branch associated with ribosomal markers than  
287 for other vertically-evolving “core” genes (Figure 2B; mean AB branch length for ribosomal  
288 proteins 1.35 substitutions/site, mean for non-ribosomal 2.25 substitutions/site).

## 289 290 ***Substitutional saturation and poor model fit contribute to underestimation of AB branch*** 291 ***length***

292  
293 For the 27 most vertically evolving genes as ranked by within-domain split score, we performed  
294 an additional round of single gene tree inference and manual review to identify and remove  
295 remaining sequences which had evidence of HGT or represented distant paralogs. The resulting  
296 single gene trees are provided in the Data Supplement (10.6084/m9.figshare.13395470). To  
297 evaluate the relationship between site evolutionary rate and AB branch length, we created two  
298 concatenations: fastest sites (comprising sites with highest probability of being in the fastest  
299 Gamma rate category; 868 sites) and slowest sites (sites with highest probability of being in the  
300 slowest Gamma rate category, 1604 sites) and compared relative branch lengths inferred from  
301 the entire concatenate, using IQ-TREE 2 to infer site-specific rates (Figure 3).

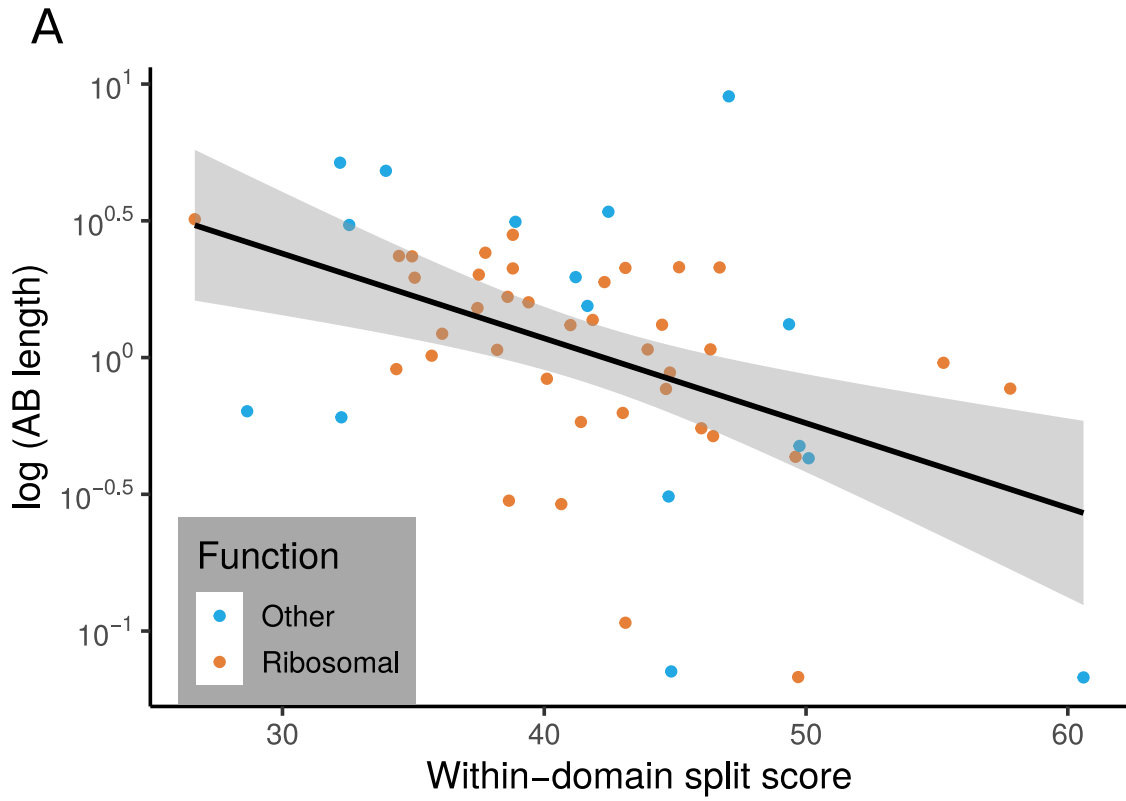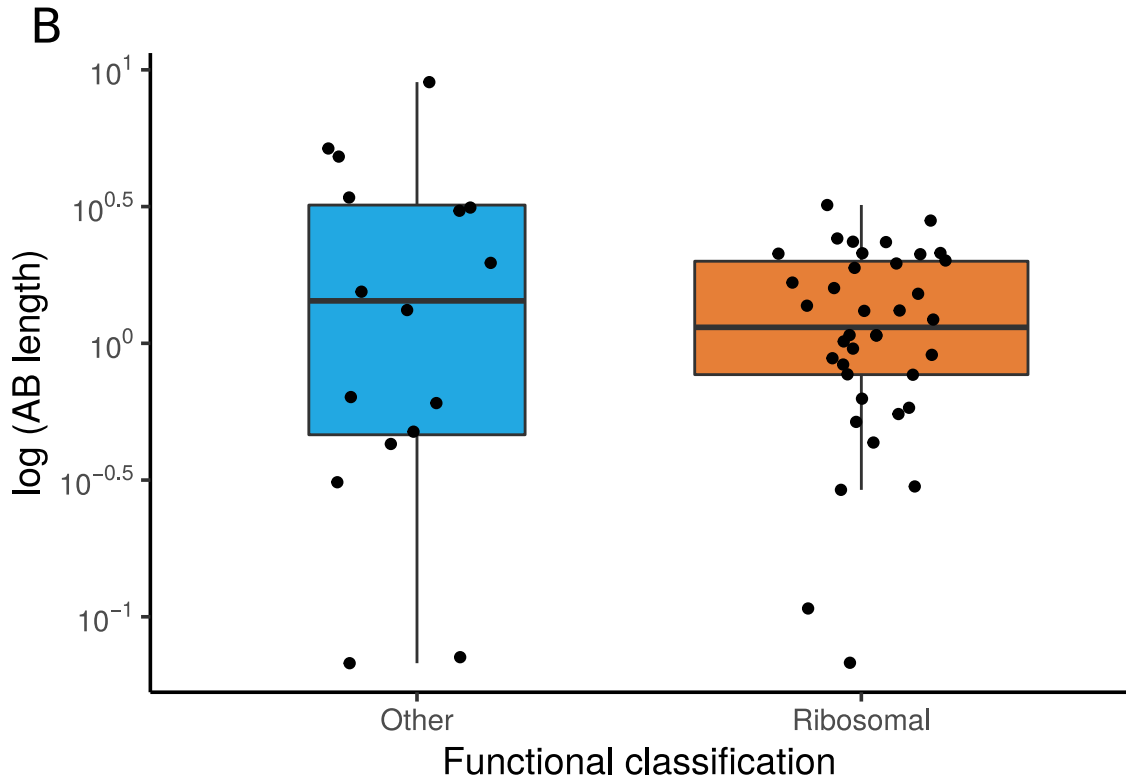

**Figure 2. The relationship between marker gene verticality, AB branch length, and functional category.** (A) Vertically-evolving phylogenetic markers have longer AB branches. The plot shows the relationship between a proxy for marker gene verticality, within-domain split score (a lower split score denotes better recovery of established within-domain relationships, see Methods), and AB branch length (in expected number of substitutions/site) for the 54 marker genes. Marker genes with higher split scores (that split established monophyletic groups into multiple subclades) have shorter AB branch lengths ( $p = 0.0311$ ,  $R = 0.294$ ). Split scores of ribosomal and non-ribosomal markers were statistically indistinguishable ( $p = 0.828$ , Figure 2-Figure Supplement 1). (B) Among vertically-evolving marker genes, ribosomal genes do not have a longer AB branch length. The plot shows functional classification of markers against AB branch length using 54 vertically-evolving markers. We did not obtain a significant difference between AB branch lengths for ribosomal and non-ribosomal genes ( $p = 0.6191$ , Wilcoxon rank-sum test).

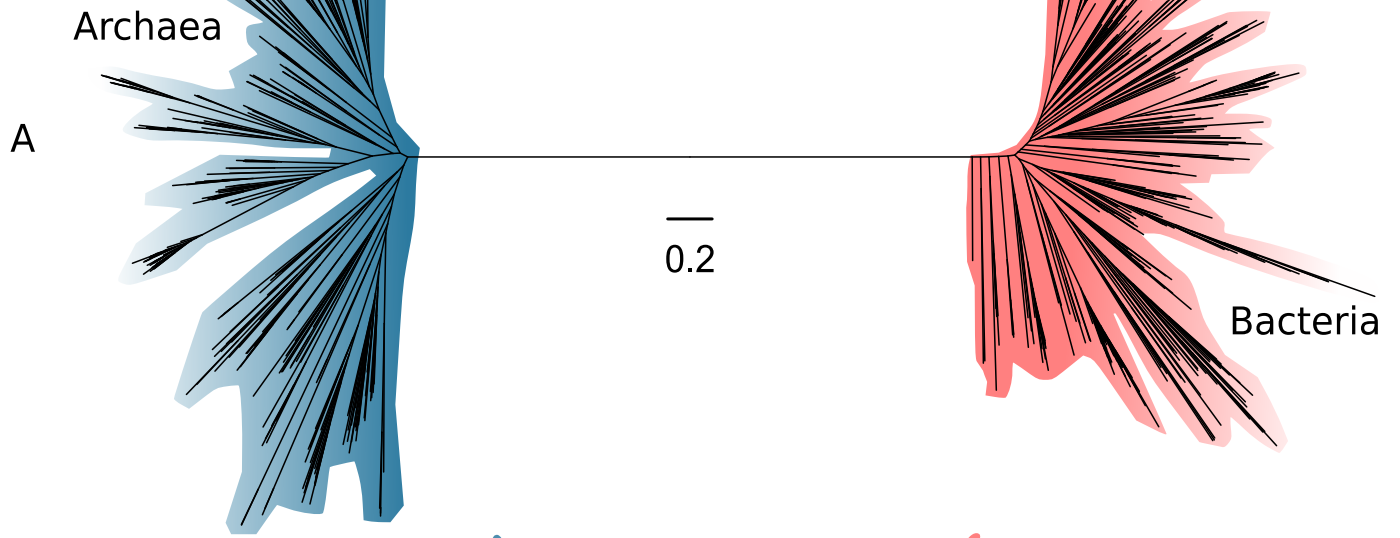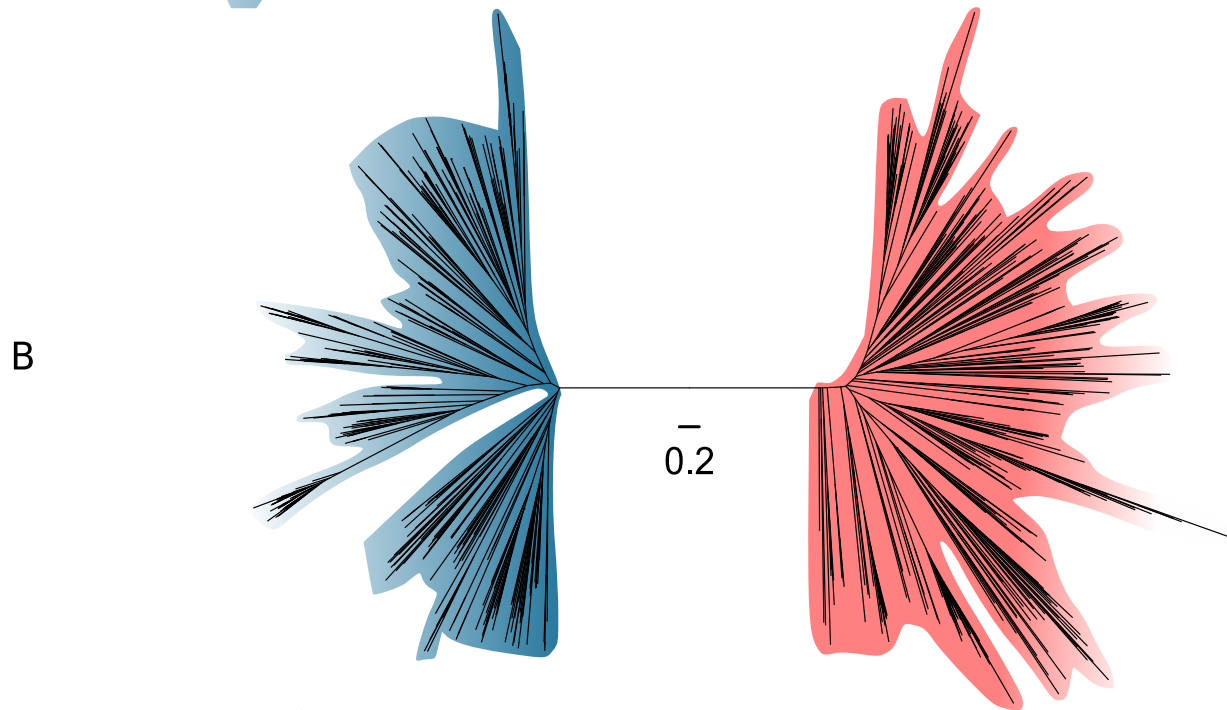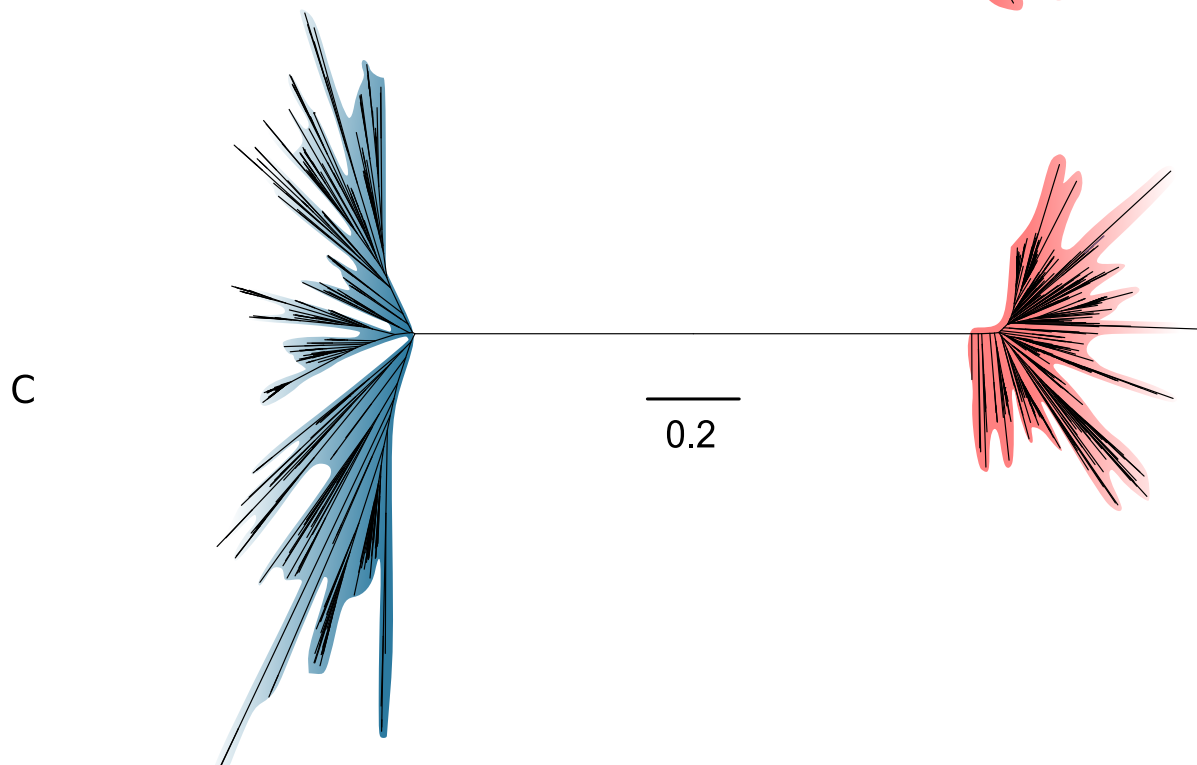

**Figure 3. Slow- and fast-evolving sites support different shapes for the universal tree.** (A) Tree of Archaea (blue) and Bacteria (red) inferred from a concatenation of 27 core genes using the best-fitting model (LG+C60+G4+F); (B) Tree inferred from the fastest-evolving sites; (C) Tree inferred from the slowest-evolving sites. To facilitate comparison of relative diversity, scale bars are provided separately for each panel; for a version of this figure with a common scale bar for all three panels, see Figure 3-Figure Supplement 1. Slow-evolving sites support a relatively long inter-domain branch and less diversity within the domains (that is, shorter between-taxa branch lengths within domains). This suggests that substitution saturation (overwriting of earlier changes) may reduce the relative length of the AB branch at fast-evolving sites and genes.

302 Notably, the proportion of inferred substitutions that occur along the AB branch differs between  
303 the slow-evolving and fast-evolving sites. As would be expected, the total tree length measured  
304 in substitutions per site is shorter from the slow-evolving sites, but the relative AB branch length  
305 is longer (1.2 substitutions/site, or ~2% of all inferred substitutions, compared to 2.6  
306 substitutions/site, or ~0.04% of all inferred substitutions for the fastest-evolving sites; see Figure  
307 3-Figure Supplement 1 for absolute tree size comparisons). Since we would not expect the  
308 distribution of substitutions over the tree to differ between slow-evolving and fast-evolving sites,  
309 this result suggests that some ancient changes along the AB branch at fast-evolving sites have  
310 been overwritten by more recent events in evolution --- that is, that substitutional saturation leads  
311 to an underestimate of the AB branch length (this is the case for both the expanded marker set,  
312 and the 27 marker set (Figure 3-Figure Supplement 2).

313  
314 Another factor that has been shown to lead to underestimation of genetic distance on deep  
315 branches is a failure to adequately model the site-specific features of sequence evolution (Lartillot  
316 and Philippe, 2004; Schrepf et al., 2020; Wang et al., 2018; Williams et al., 2020; Zhu et al.,  
317 2019). Amino acid preferences vary across the sites of a sequence alignment, due to variation in  
318 the underlying functional constraints (Lartillot and Philippe, 2004; Quang et al., 2008; Wang et al.,  
319 2008). The consequence is that, at many alignment sites, only a subset of the twenty possible  
320 amino acids are tolerated by selection. Standard substitution models such as LG+G4+F are site-  
321 homogeneous, and approximate the composition of all sites using the average composition  
322 across the entire alignment. Such models underestimate the rate of evolution at highly  
323 constrained sites because they do not account for the high number of multiple substitutions that  
324 occur at such sites. The effect is that site-homogeneous models underestimate branch lengths  
325 when fit to site-heterogeneous data. Site-heterogeneous models have been developed that  
326 account for site-specific amino acid preferences, and these generally show improved fit to real  
327 protein sequence data (reviewed in (Williams et al., 2021)). To evaluate the impact of substitution  
328 models on estimates of AB branch length, we assessed the fit of a range of models to the full  
329 concatenation using the Bayesian information criterion (BIC) in IQ-TREE 2. The AB branch length  
330 inferred under the best-fit model, the site-heterogeneous LG+C60+G4+F model, was 2.52  
331 substitutions/site, ~1.7-fold greater than the branch length inferred from the site-homogeneous  
332 LG+G4+F model (1.45 substitutions/site). Thus, substitution model fit has a major effect on the  
333 estimated length of the AB branch, with better-fitting models supporting a longer branch length  
334 (Table 1). The same trends are evident when better-fitting site-heterogeneous models are used  
335 to analyse the expanded marker set: considering only the top 5% of genes by  $\Delta$ LL score, the AB  
336 branch length is 1.2 under LG+G4+F, but increases to 2.4 under the best-fitting LG+C60+G4+F  
337 model (Figure 3-Figure Supplement 3). These results are consistent with (Zhu et al., 2019), who  
338 also noted that AB branch length increases as model fit improves for the expanded marker  
339 dataset.

340  
341 Overall, these results indicate that difficulties with modelling sequence evolution, either due to  
342 substitutional saturation or failure to model variation in site compositions, lead to an under-  
343 estimation of the AB branch length, both in published analyses and for the analyses of the new  
344 dataset presented here. As substitution models improve, we would therefore expect estimates of  
345 the AB branch length to increase further.

346

| Substitution model | BIC ( $\Delta$ BIC) | AB branch length |
|--------------------|---------------------|------------------|
| LG+G4+F            | 5935950.053         | 1.4491           |
| LG+C20+G4+F        | (152046.1)          | 2.1394           |
| LG+C40+G4+F        | (179126.7)          | 2.4697           |
| LG+C60+G4+F        | (189063.8)          | 2.5178           |

347 **Table 1. The inferred AB branch length from a concatenation of the top 27 markers using**  
348 **a simple model versus models which account for site compositional heterogeneity.** Models  
349 that account for across-site compositional heterogeneity fit the data better (as assessed by lower  
350 BIC scores) and infer a longer AB branch length.

351

### 352 ***A phylogeny of Archaea and Bacteria inferred from 27 vertically-evolving marker genes***

353

354 The phylogeny of the primary domains of life inferred from the 27 most vertically-evolving genes  
355 using the best-fitting LG+C60+G4+F model (Figure 4) is consistent with recent single-domain  
356 trees inferred for Archaea and Bacteria independently (Coleman et al., 2021; Dombrowski et al.,  
357 2020; Williams et al., 2017), although the deep relationships within Bacteria are poorly resolved,  
358 with the exception of the monophyly of Gracilicutes (Figure 4). Our results are also in good  
359 agreement with a recent estimate of the universal tree based on a different marker gene selection  
360 approach (Martinez-Gutierrez and Aylward, 2021). In that study, marker genes were selected  
361 based on Tree Certainty, a metric that quantifies phylogenetic signal based on the extent to which  
362 markers distinguish between different resolutions of conflicting relationships (Salichos and Rokas,  
363 2013).

364

365 Our analysis placed the Candidate Phyla Radiation (CPR) (Brown et al., 2015) as a sister lineage  
366 to Chloroflexi (Chloroflexota) rather than as a deep-branching bacterial superphylum. While this  
367 contrasts with initial trees suggesting that CPR may represent an early diverging sister lineage of  
368 all other Bacteria (Brown et al., 2015; Castelle and Banfield, 2018; Hug et al., 2016), our finding  
369 is consistent with recent analyses that have instead recovered CPR within the Terrabacteria  
370 (Coleman et al., 2021; Martinez-Gutierrez and Aylward, 2021; Taib et al., 2020). Together, these  
371 analyses suggest that the deep-branching position of CPR in some trees may be a result of long  
372 branch attraction, a possibility that has been raised previously (Hug et al., 2016; Méheust et al.,  
373 2019).

374

375 The deep branches of the archaeal subtree are well-resolved in the ML tree and recover clades  
376 of DPANN (albeit at 51% bootstrap support), Asgard (100% bootstrap support), and TACK  
377 Archaea (75% bootstrap support), in agreement with a range of previous studies (Dombrowski et  
378 al., 2020; Guy and Ettema, 2011; Raymann et al., 2015; Williams et al., 2017). We also find  
379 support for the placement of Methanonatronarchaeia (Sorokin et al., 2017) distant to Halobacteria  
380 within the Methanotecta, in agreement with recent analyses and suggesting their initial placement  
381 with Halobacteria (Sorokin et al., 2017) may be an artifact of compositional attraction (Aouad et  
382 al., 2019; Dombrowski et al., 2020; Feng et al., 2021; Martijn et al., 2020). Notably, the  
383 Hadesarchaea (92% bootstrap support) and a clade comprising Theionarchaea,  
384 Methanofastidiosa, and Thermococcales (92% bootstrap support) branch basal to the clade  
385 comprising TACK and Asgard Archaea in our analysis, rather than with other Euryarchaeota.

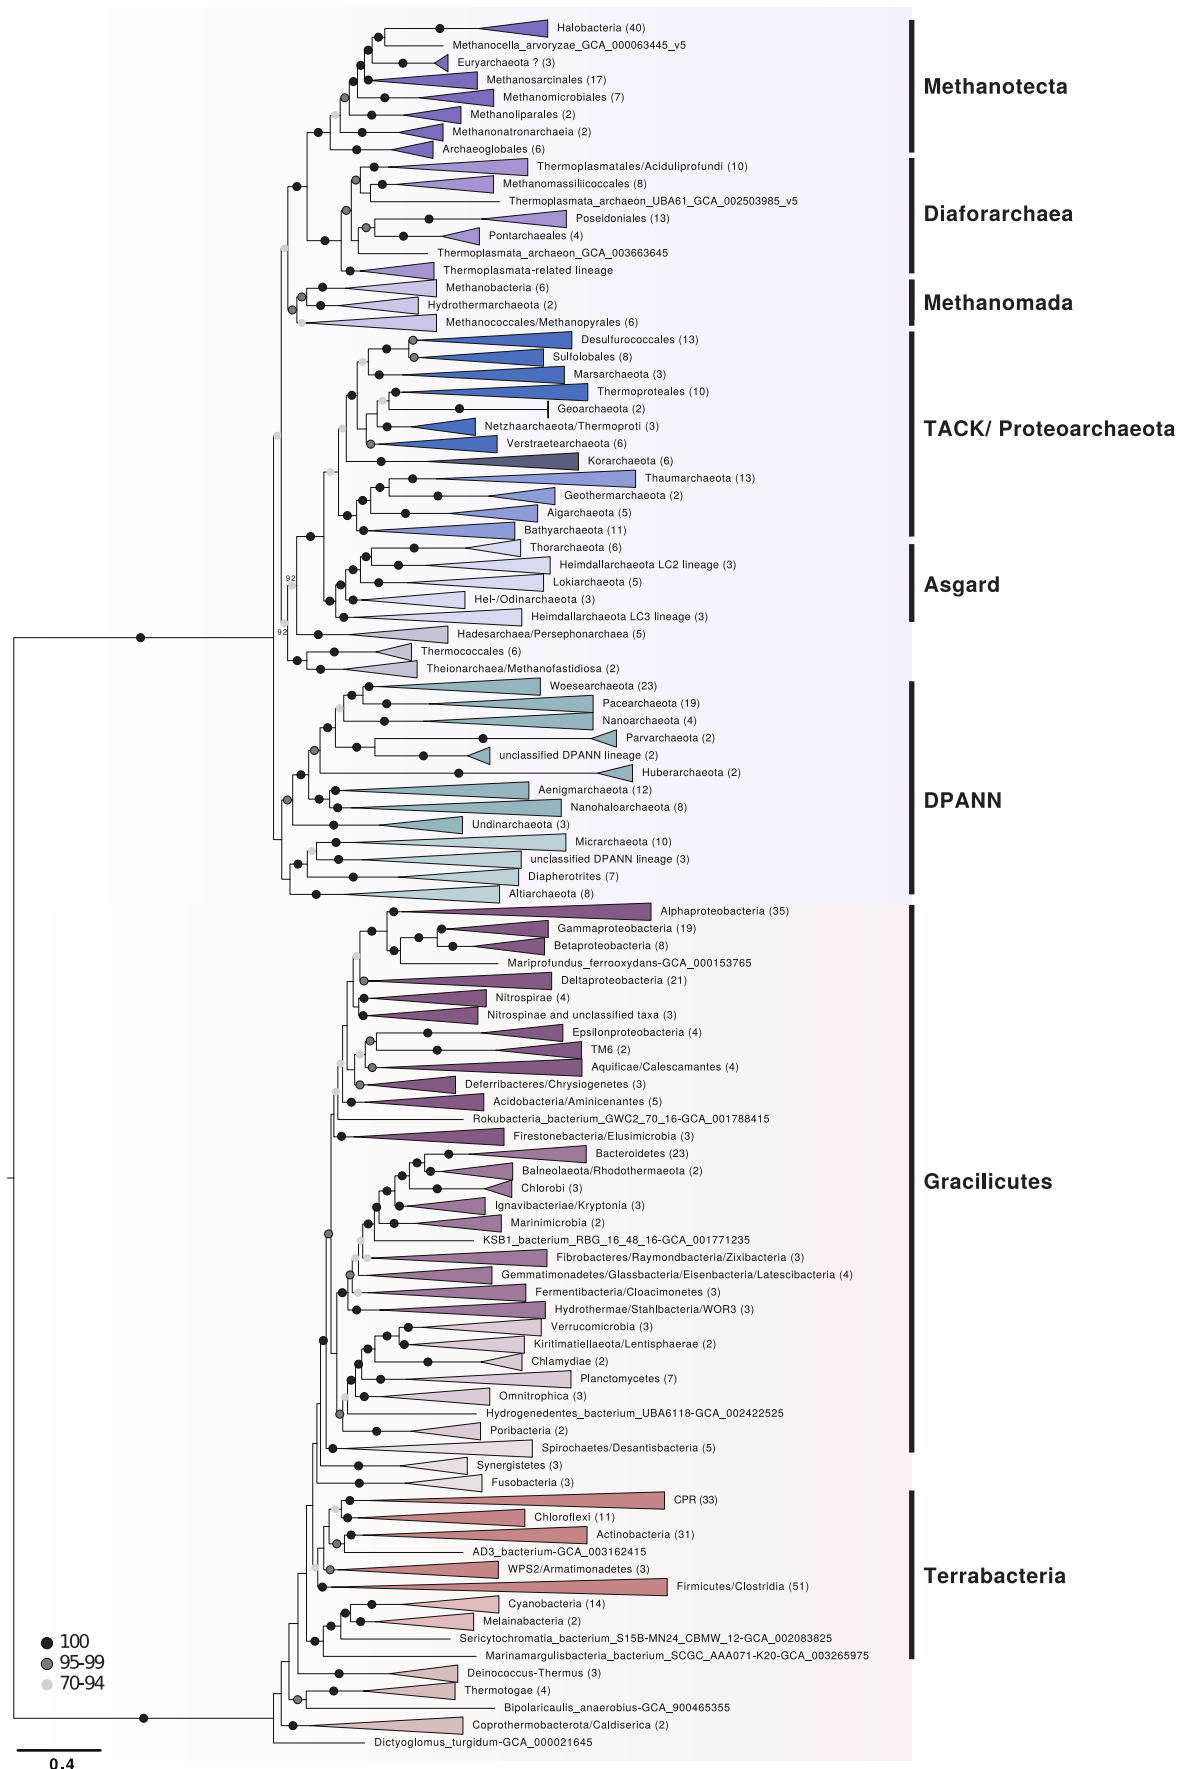



**Figure 4: A phylogeny of Archaea and Bacteria inferred from a concatenation of 27 marker genes.** Consistent with some recent studies (Dombrowski et al., 2020; Guy and Ettema, 2011; Raymann et al., 2015; Williams et al., 2017), we recovered the DPANN, TACK and Asgard Archaea as monophyletic groups. Although the deep branches within Bacteria are poorly resolved, we recovered a sister group relationship between CPR and Chloroflexota, consistent with recent reports (Taib et al., 2020, Coleman et al., 2021). The tree was inferred using the best-fitting LG+C60+G4+F model in IQ-TREE 2 (Minh et al., 2020). Branch lengths are proportional to the expected number of substitutions per site. Support values are ultrafast (UFBoot2) bootstraps (Hoang et al., 2018). Numbers in parenthesis refer to the number of taxa within each collapsed clade. Please note that collapsed taxa in the Archaea and Bacteria roughly correspond to order- and phylum-level lineages, respectively.

386 These positions have been previously reported (Adam et al., 2017; Raymann et al., 2015;  
387 Williams et al., 2017), though the extent of euryarchaeotal paraphyly and the lineages involved  
388 has varied among analyses.

389  
390 A basal placement of DPANN within Archaea is sometimes viewed with suspicion (Aouad et al.,  
391 2018) because DPANN genomes are reduced and appear to be fast-evolving, properties that may  
392 cause LBA artifacts (Dombrowski et al., 2019) when analyses include Bacteria. However, in  
393 contrast to CPR, with which DPANN share certain ecological and genomic similarities (e.g. host  
394 dependency, small genomes, limited metabolic potential), the early divergence of DPANN from  
395 the archaeal branch has received support from a number of recent studies ((Baker et al., 2020;  
396 Beam et al., 2020; Dombrowski et al., 2020; Rinke et al., 2021; Williams et al., 2017; Zaremba-  
397 Niedzwiedzka et al., 2017) though the inclusion of certain lineages within this radiation remains  
398 controversial (Aouad et al. 2018; Feng et al., 2021). While more in-depth analyses will be needed  
399 to further illuminate the evolutionary history of DPANN and establish which archaeal clades  
400 constitute this lineage, our work is in agreement with current literature and a recently established  
401 phylogeny-informed archaeal taxonomy (Rinke et al., 2021).

402  
403 A broader observation from our analysis is that the phylogenetic diversity of the archaeal and  
404 bacterial domains, measured as substitutions per site in this consensus set of vertically-evolving  
405 marker genes, appears to be similar (Figure 3A; the mean root to tip distance for archaea: 2.38,  
406 for bacteria: 2.41, the range of root to tip distances for archaea: 1.79-3.01, for bacteria: 1.70-  
407 3.17). Considering only the slowest-evolving category of sites, branch lengths within Archaea are  
408 actually longer than within Bacteria (Figure 3C). This result differs from some published trees  
409 (Hug et al., 2016; Zhu et al., 2019) in which the phylogenetic diversity of Bacteria has appeared  
410 to be significantly greater than that of Archaea. By contrast to those earlier studies, we analysed  
411 a set of 350 genomes from each domain, an approach which may tend to reduce the differences  
412 between them. While we had to significantly downsample the sequenced diversity of Bacteria,  
413 our sampling nonetheless included representatives from all known major lineages of both  
414 domains (Figure 4-Figure Supplements 1,2, see Figure 1-Figure Supplements 14,15,16 for a  
415 comparison with the expanded marker set), and so might be expected to recover a difference in  
416 diversity, if present. Our analyses and a number of previous studies (Hug et al., 2016; Parks et  
417 al., 2018; Petitjean et al., 2014; Zhu et al., 2019) indicate that the choice of marker genes has a  
418 profound impact on the apparent phylogenetic diversity of certain prokaryotic groups; for instance,  
419 in the proportion of bacterial diversity composed of CPR (Hug et al., 2016; Parks et al., 2017).  
420 Our results demonstrate that slow and fast-evolving sites from the same set of marker genes  
421 support different tree shapes and branch lengths; it therefore seems possible that between-  
422 dataset differences are due, at least in part, to evolutionary rate variation within and between  
423 marker genes.

424  
425 ***Difficulties in estimating the age of the last universal common ancestor***

426  
427 While a consensus may be emerging on the topology of the universal tree, estimates of the ages  
428 of the deepest branches, and their lengths in geological time, remain highly uncertain. The fossil  
429 record of early life is incomplete and difficult to interpret (Wacey, 2009), and in this context  
430 molecular clock methods provide a means of combining the abundant genetic data available for  
431 modern organisms with the limited fossil record to improve our understanding of early evolution  
432 (Betts et al., 2018). The 381 gene dataset was suggested to be (Zhu et al., 2019) useful for  
433 inferring deep divergence times, because age estimates of the last universal common ancestor

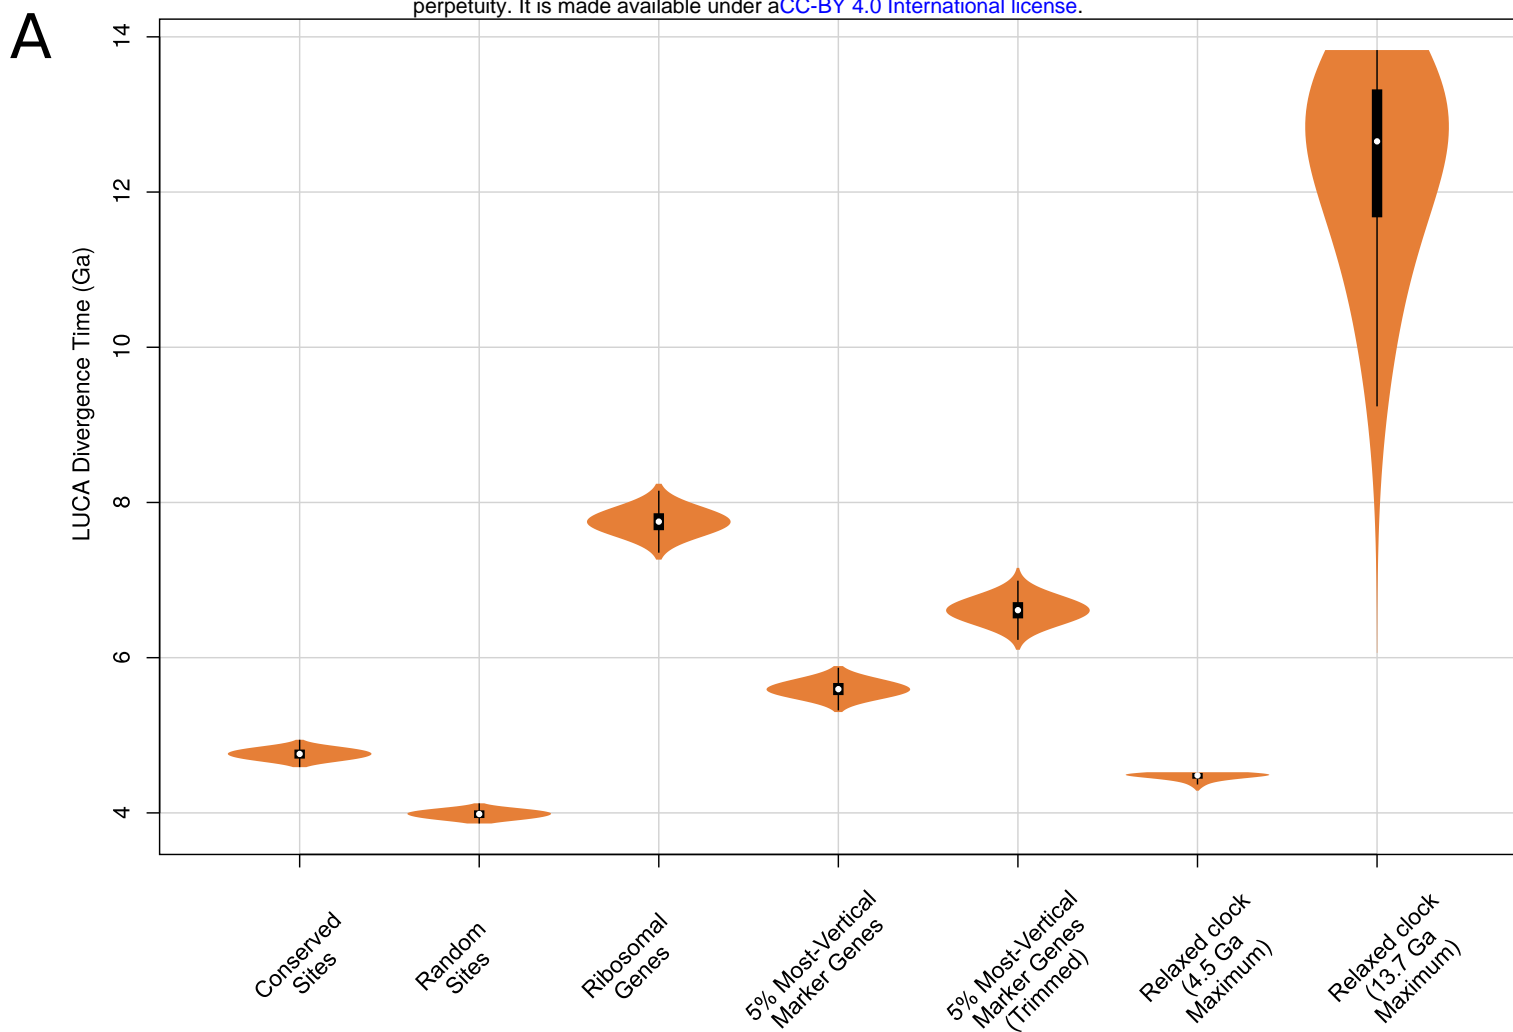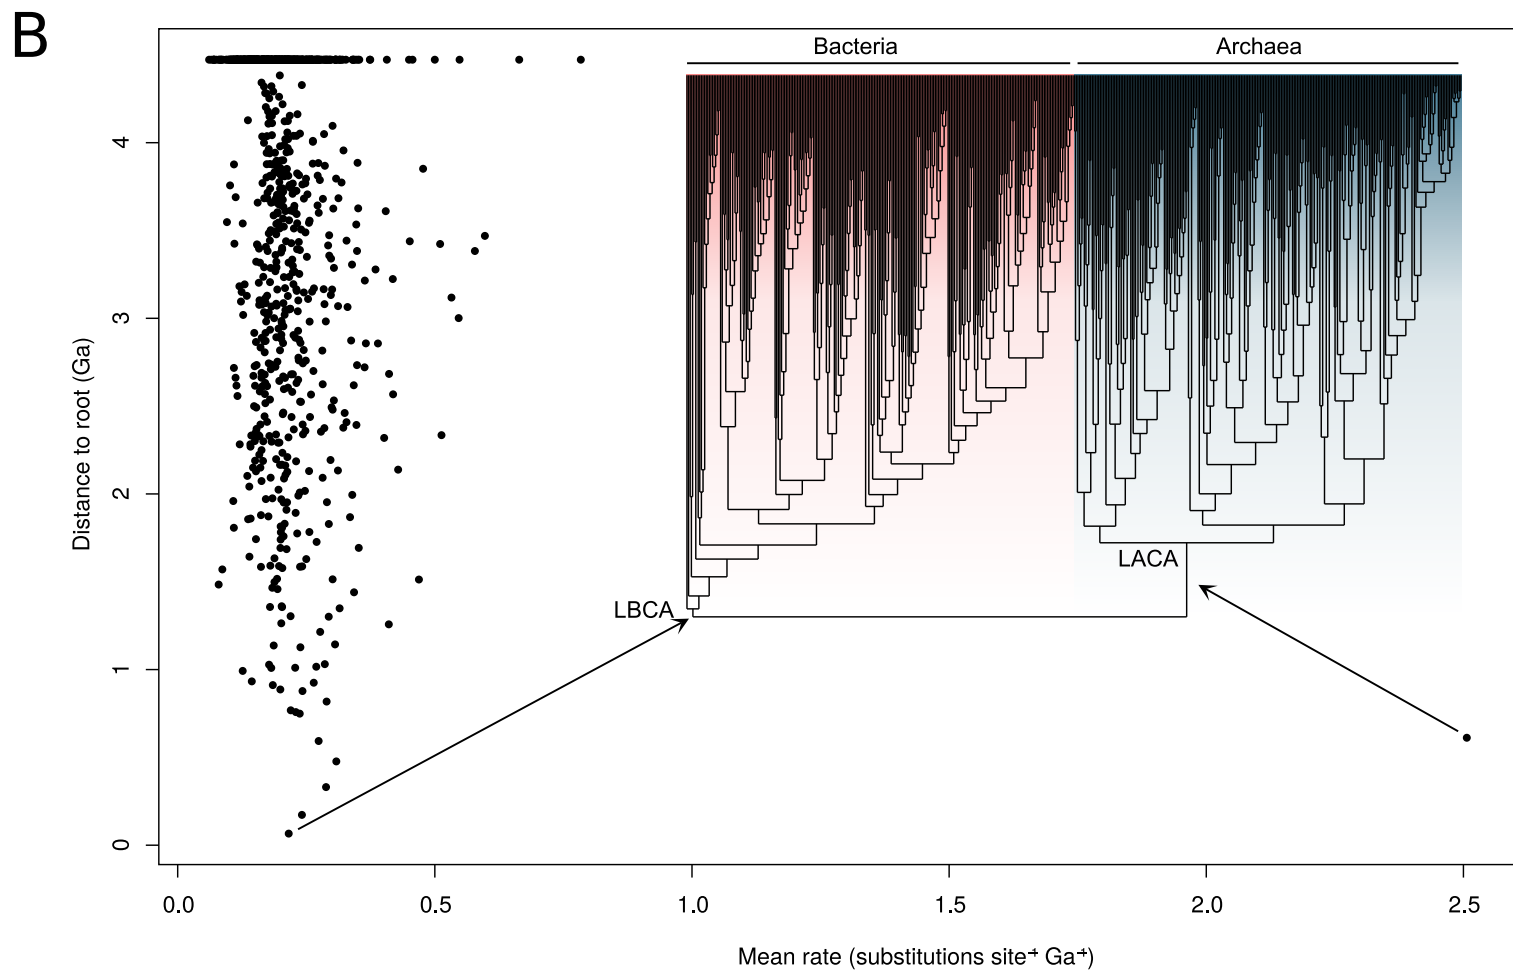

**Figure 5. Molecular clock estimates of LUCA and LACA age are uncertain due to a lack of deep calibrations and maximum ages for microbial clades.** (A) Posterior node age estimates from Bayesian molecular clock analyses of 1) Conserved sites as estimated previously (Zhu et al., 2019); 2) Random sites (Zhu et al., 2019) 3) Ribosomal genes (Zhu et al., 2019) 4) The top 5% of marker gene families according to their  $\Delta$ LL score (including only 1 ribosomal protein) and 5) The same top 5% of marker genes trimmed using BMGE (Crisuolo and Gribaldo, 2010) to remove poorly-aligned sites. In each case, a strict molecular clock was applied, with the age of the Cyanobacteria-Melainabacteria split constrained between 2.5 and 2.6 Ga. In 6) and 7) an expanded set of fossil calibrations were implemented with a relaxed (lognormal) molecular clock. In 6) a soft maximum age of 4.520 Ga was applied, representing the age of the moon-forming impact (Kleine et al., 2005). In 7) a soft maximum age corresponding to the estimated age of the universe (Planck Collaboration et al., 2018) was applied. (B) Inferred rates of molecular evolution along the phylogeny in a relaxed clock analysis where the maximum age was set to 4.520 Ga. The rate of evolution along the archaea stem lineage was a clear outlier (mean = 2.51, 95% HPD = 1.6-3.5 subs. site<sup>-1</sup> Ga<sup>-1</sup>).

434 (LUCA) from this dataset using a strict molecular clock were in agreement with the geological  
435 record: a root (LUCA) age of 3.6-4.2 Ga was inferred from the entire 381 gene dataset, consistent  
436 with the earliest fossil evidence for life (Betts et al., 2018; Sugitani et al., 2015). By contrast,  
437 analysis of ribosomal markers alone (Zhu et al., 2019) supported a root age of ~7 Ga, which might  
438 be considered implausible because it is older than the age of the Earth and Solar System (with  
439 the moon-forming impact occurring ~4.52 Ga (Barboni et al., 2017; Hanan and Tilton, 1987)).

440  
441 The published molecular clock analyses (Zhu et al., 2019) made use of concatenation-based  
442 branch lengths in which topological disagreement among sites is not modelled, and are likely to  
443 be affected by the impact of non-vertical marker genes and substitutional saturation on branch  
444 length estimation discussed above. Consistent with this hypothesis, divergence time inference  
445 using the same method on the 5% most-vertical subset of the expanded marker set (as  
446 determined by  $\Delta$ LL; this set of 20 genes includes only one ribosomal protein, see Supplementary  
447 File 5a), resulted in age estimates for LUCA that exceed the age of the Earth, >~5.5Ga (Figure  
448 5), approaching the age inferred from the ribosomal genes (7.46-8.03 Ga). These results (Figure  
449 5) suggest that the apparent agreement between the fossil record and divergence times estimated  
450 from the expanded gene set may be due, at least in part, to the shortening of the AB branch due  
451 to phylogenetic incongruence among marker genes.

452  
453 In the original analyses, the age of LUCA was estimated using a strict clock with a single  
454 calibration constraining the split between Cyanobacteria and Melainabacteria derived from  
455 estimates of the Great Oxidation Event and a secondary estimate of the age of cyanobacteria  
456 derived from an independent analysis (Shih et al., 2017). The combination of a strict clock and  
457 only two calibrations is not sufficient to capture the variation in evolutionary rate over deep  
458 timescales (Drummond et al., 2006). To investigate whether additional calibrations might help to  
459 improve age estimates for deep nodes in the universal tree, we performed analyses on our new  
460 27 marker gene dataset using two different relaxed clock models (with branchwise independent  
461 and autocorrelated rates) and 7 additional calibrations (Supplementary File 5b). Unfortunately, all  
462 of these were minimum age calibrations with the exception of the root (for which the moon-forming  
463 impact 4.52Ga (Kleine et al., 2005) provides a reasonable maximum), due to the difficulty of  
464 establishing uncontroversial maximum ages for microbial clades. Maximum age constraints are  
465 essential to inform faster rates of evolution because, in combination with more abundant minimum  
466 age constraints, they imply that a given number of substitutions must have accumulated in at most  
467 a certain interval of time. In the absence of other maximum age constraints, the only lower bound  
468 on the rate of molecular evolution is provided by the maximum age constraint on the root (LUCA).

469  
470 These new analyses indicated that even with additional minimum age calibrations, the age of  
471 LUCA inferred from the 27-gene dataset was unrealistically old, falling close to the maximum age  
472 constraint in all analyses even when the maximum was set to the age of the known universe  
473 (13.7Ga (Planck Collaboration et al., 2018); Figure 5). Inspection of the inferred rates of molecular  
474 evolution across the tree (Figure 5B) provides some insight into these results: the mean rate is  
475 low (mean = 0.21, 95% credibility interval = 0.19-0.22 subs. site<sup>-1</sup> Ga<sup>-1</sup>), so that long branches  
476 (such as the AB stem), in the absence of other information, are interpreted as evidence of a long  
477 period of geological time. These low rates likely result both from the limited number of calibrations  
478 and, in particular, the lack of maximum age constraints.

479  
480 An interesting outlier among inferred rates is the LUCA to LACA branch, which has a rate tenfold  
481 greater than the average (mean = 2.51, 95% HPD = 1.6-3.5 subs. site<sup>-1</sup> Ga<sup>-1</sup>). The reason is that

482 calibrations within Bacteria imply that LBCA cannot be younger than 3.227 Ga (Manzimnyama  
483 Banded Ironstone Formation provides evidence of cyanobacterial oxygenation (Satkoski et al.,  
484 2015), Supplementary File 5b)); as a result, with a 4.52Ga maximum the LUCA to LBCA branch  
485 cannot be longer than 1.28Ga. By contrast, the early branches of the archaeal tree are poorly  
486 constrained by fossil evidence. Analysis without the 3.227Ga constraint resulted in overlapping  
487 age estimates for LBCA (4.47-3.53Ga) and LACA (4.37-3.44Ga). Finally, analysis of the archaeal  
488 and bacterial subtrees independently (that is, without the AB branch, rooted on LACA and LBCA,  
489 respectively) resulted in LBCA and LACA ages that abut the maximum root age (LBCA: 4.52-  
490 4.38Ga; LACA: 4.52-4.14Ga). This analysis demonstrates that, under these analysis conditions,  
491 the inferred age of the root (whether corresponding to LUCA, LACA or LBCA) is strongly  
492 influenced by the prior assumptions about the maximum age of the root.

493  
494 In sum, the agreement between fossils and age estimates from the expanded gene set appears  
495 to result from the impact of phylogenetic incongruence on branch length estimates. Under more  
496 flexible modelling assumptions the limitations of current clock methods for estimating the age of  
497 LUCA become manifest: the sequence data only contain limited information about the age of the  
498 root, with posterior estimates driven by the prior assumptions about the maximum age of the root.  
499 This analysis implies several possible ways to improve age estimates of deep branches in future  
500 analyses. More calibrations, particularly maximum age constraints and calibrations within  
501 Archaea, are essential to refine the current estimates. Given the difficulties in establishing  
502 maximum ages for archaeal and bacterial clades, constraints from other sources such as donor-  
503 recipient age constraints inferred from HGTs (Davin et al., 2018; Fournier et al., 2021; Szöllösi et  
504 al., 2021; Wolfe and Fournier, 2018), or clock models that capture biological opinion about rate  
505 shifts in early evolution, may be particularly valuable.

## 506 507 Conclusion

508  
509 Our analysis of a range of published marker gene datasets (Petitjean et al., 2014; Spang et al.,  
510 2015; Williams et al., 2020; Zhu et al., 2019) indicates that the choice of markers and the fit of the  
511 substitution model are both important for inference of deep phylogeny from concatenations, in  
512 agreement with an existing body of literature (reviewed in (Kapli et al., 2021, 2020; Williams et  
513 al., 2021). We established a set of 27 highly vertically evolving marker gene families and found  
514 no evidence that ribosomal genes overestimate stem length; since they appear to be transferred  
515 less frequently than other genes, our analysis affirms that ribosomal proteins are useful markers  
516 for deep phylogeny. In general, high-verticality markers, regardless of functional category,  
517 supported a longer AB branch length. Furthermore, our phylogeny was consistent with recent  
518 work on early prokaryotic evolution, resolving the major clades within Archaea and nesting the  
519 CPR within Terrabacteria. Notably, our analyses suggested that both the true Archaea-Bacteria  
520 branch length (Figure 6A), and the phylogenetic diversity of Archaea, may be underestimated by  
521 even the best current models, a finding that is consistent with a root for the tree of life between  
522 the two prokaryotic domains.

523  
524 Phylogenies inferred from “core” genes involved in translation and other conserved cellular  
525 processes have provided one of the few available windows into the earliest period of archaeal  
526 and bacterial evolution. However, core genes comprise only a small proportion of prokaryotic  
527 genomes, and have sometimes been viewed as outliers (Zhu et al., 2019) in the sense that they  
528 are unusually vertical among prokaryotic gene families. This means that they are among the few

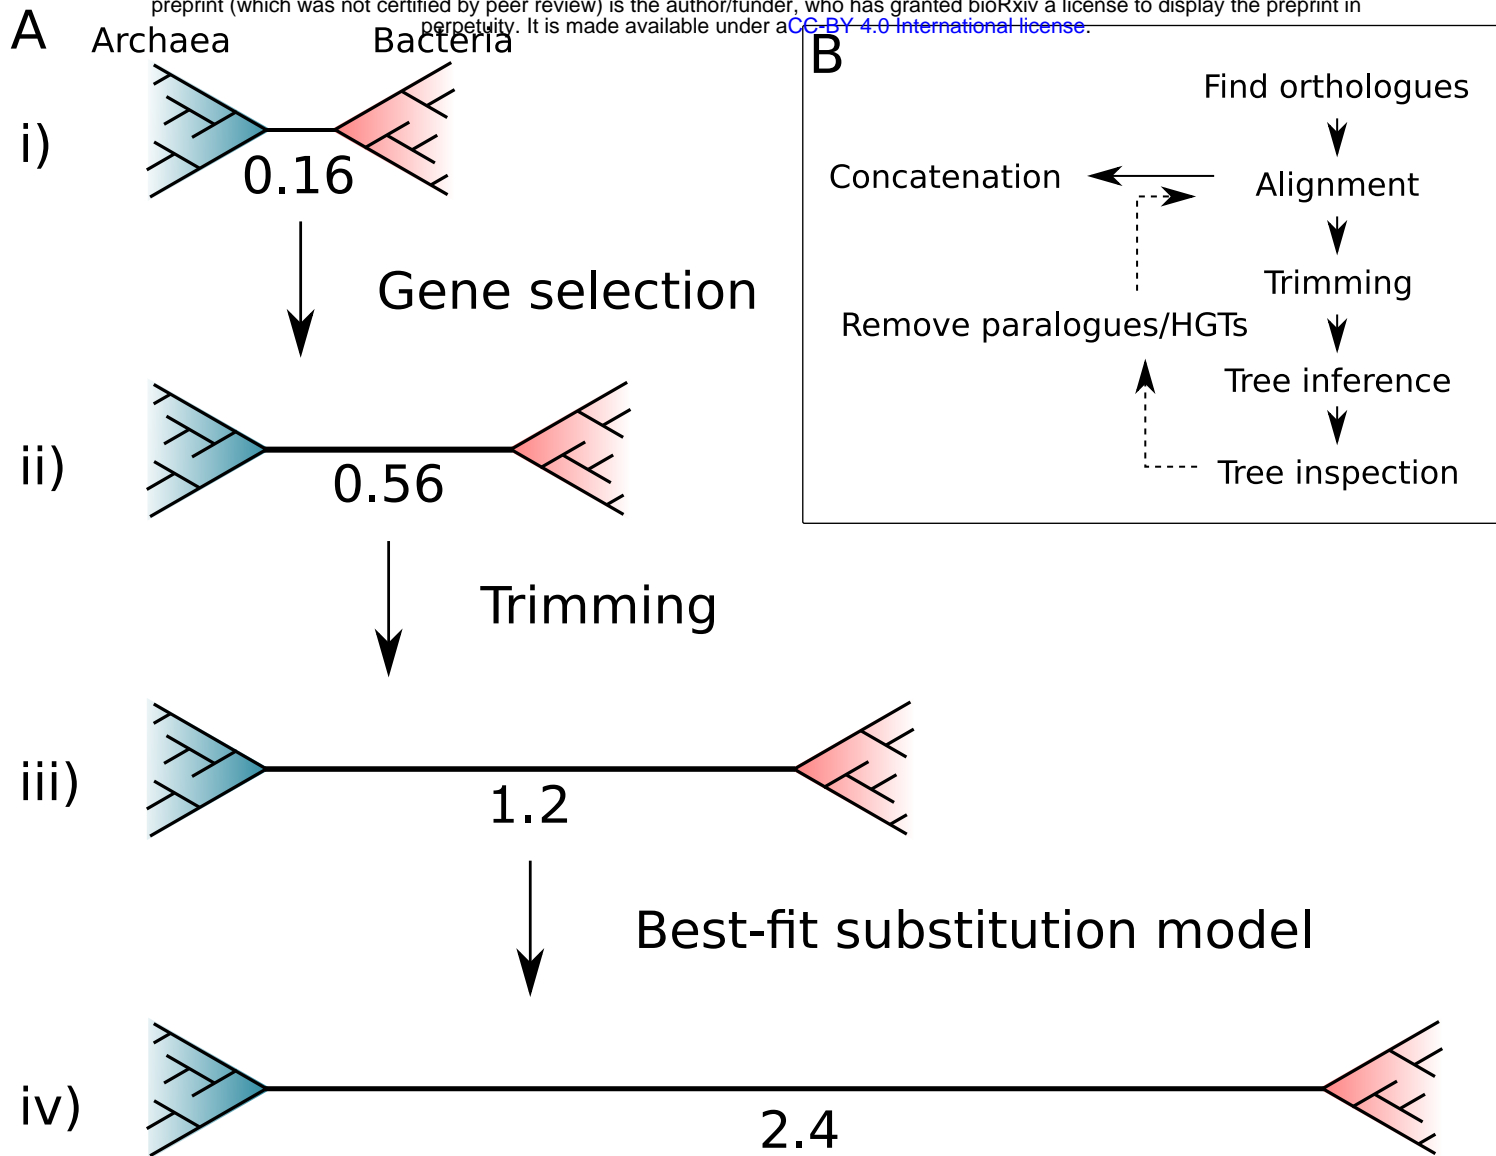

**Figure 6. The impact of marker gene choice, phylogenetic congruence, alignment trimming, and substitution model fit on estimates of the Archaea-Bacteria branch length.** (A) Analysis using a site-homogeneous model (LG+G4+F) on the complete 381 gene expanded set (i) results in an AB branch substantially shorter than previous estimates. Removing the genes most seriously affected by inter-domain gene transfer (ii), trimming poorly-aligned sites (iii) using BMGE (Criscuolo and Gribaldo, 2010) in the original alignments (see below), and using the best-fitting site-heterogeneous model (iv) (LG+C60+G4+F) substantially increase the estimated AB length, such that it is comparable with published estimates from the “core” set: 3.3 (Williams et al., 2020) and the consensus set of 27 markers identified in the present study: 2.5. Branch lengths measured in expected number of substitutions/site. (B) Workflow for iterative manual curation of marker gene families for concatenation analysis. After inference and inspection of initial orthologue trees, several rounds of manual inspection and removal of HGTs and distant paralogues were carried out. These sequences were removed from the initial set of orthologues before alignment and trimming. For a detailed discussion of some of these issues, and practical guidelines on phylogenomic analysis of multi-gene datasets, see (Kapli et al., 2020) for a useful review.



529 prokaryotic gene families amenable to concatenation methods, which are useful for pooling signal  
530 from individual weakly-resolved gene trees but which make the assumption that all sites evolve  
531 on the same underlying tree. If other gene families are included in concatenations, the results can  
532 be difficult to predict because differences in topology across sites are not modelled. Our analyses  
533 of the 381 gene expanded set suggest that this incongruence can lead to under-estimation of the  
534 evolutionary distance between Archaea and Bacteria, in the sense of the branch length separating  
535 the archaeal and bacterial domains. We note that alternative conceptions of evolutionary distance  
536 are possible; for example, in a phenetic sense of overall genome similarity, extensive HGT will  
537 increase the evolutionary proximity (Zhu et al., 2019) of the domains so that Archaea and Bacteria  
538 may become intermixed at the single gene level. While such data can encode an important  
539 evolutionary signal, it is not amenable to concatenation analysis. At the same time, it is clearly  
540 unsatisfactory to base our view of early evolution on a relatively small set of genes that appear to  
541 experience selective pressures rather distinct from the forces at play more broadly in prokaryotic  
542 genome evolution. These limitations are particularly unfortunate given the wealth of genome data  
543 now available to test hypotheses about early evolution. Exploring the evolutionary signal in more  
544 of the genome than hitherto is clearly a worthwhile endeavour. New methods, including more  
545 realistic models of gene duplication, transfer and loss (Morel et al., 2021; Szöllösi et al., 2013),  
546 and extensions to supertree methods to model paralogy (Zhang et al., 2020) and gene transfer,  
547 promise to enable genome-wide inference of prokaryotic history and evolutionary processes using  
548 methods that can account for the varying evolutionary histories of individual gene families.

## 549 Methods

550

### 551 **Data**

552

553 We downloaded the individual alignments from (Zhu et al., 2019)  
554 (<https://github.com/biocore/wol/tree/master/data/>), along with the genome metadata and the  
555 individual newick files. We checked each published tree for domain monophyly, and also  
556 performed approximately unbiased (AU) (Shimodaira, 2002) tests to assess support for domain  
557 monophyly on the underlying sequence alignments using IQ-TREE 2.0.6 (Minh et al., 2020). The  
558 phylogenetic analyses were carried out using the ‘reduced’ subset of 1000 taxa outlined by the  
559 authors (Zhu et al., 2019), for computational tractability. These markers were trimmed according  
560 to the protocol in the original paper (Zhu et al., 2019), i.e sites with >90% gaps were removed,  
561 followed by removal of sequences with >66% gaps.

562

563 We also downloaded the Williams et al.(Williams et al., 2020) (“core”), Petitjean et al. (Petitjean  
564 et al., 2014) (“non-ribosomal”) and Coleman et al. (Coleman et al., 2021) (“bacterial”) datasets  
565 from their original publications.

566

### 567 **Annotations**

568

569 Proteins used for phylogenetic analyses by Zhu *et al.*(Zhu et al., 2019), were annotated to  
570 investigate the selection of sequences comprising each of the marker gene families. To this end,  
571 we downloaded the protein sequences provided by the authors from the following repository:  
572 <https://github.com/biocore/wol/tree/master/data/alignments/genes>. To obtain reliable  
573 annotations, we analysed all sequences per gene family using several published databases,  
574 including the arCOGs (version from 2014)(Seemann, 2014), KOs from the KEGG Automatic  
575 Annotation Server (KAAS; downloaded April 2019)(Aramaki et al., 2020), the Pfam database  
576 (Release 31.0)(Bateman et al., 2004), the TIGRFAM database (Release 15.0)(Haft et al., 2003),  
577 the Carbohydrate-Active enZymes (CAZy) database (downloaded from dbCAN2 in September  
578 2019)(Cantarel et al., 2009), the MEROPs database (Release 12.0)(Rawlings et al., 2016),(Saier  
579 et al., 2006), the hydrogenase database (HydDB; downloaded in November 2018)(Søndergaard  
580 et al., 2016), the NCBI- non-redundant (nr) database (downloaded in November 2018), and the  
581 NCBI COGs database (version from 2020). Additionally, all proteins were scanned for protein  
582 domains using InterProScan (v5.29-68.0; settings: --iprlookup --goterms) (Jones et al., 2014).

583

584 Individual database searches were conducted as follows: arCOGs were assigned using PSI-  
585 BLAST v2.7.1+ (settings: -evalue 1e-4 -show\_gis -outfmt 6 -max\_target\_seqs 1000 -dbsize  
586 100000000 -comp\_based\_stats F -seg no)(Altschul et al., 1997). KOs (settings: -E 1e-5), PFAMs  
587 (settings: -E 1e-10), TIGRFAMs (settings: -E 1e-20) and CAZymes (settings: -E 1e-20) were  
588 identified in all archaeal genomes using hmmsearch v3.1b2(Finn et al., 2011). The MEROPs and  
589 HydDB databases were searched using BLASTp v2.7.1 (settings: -outfmt 6, -evalue 1e-20).  
590 Protein sequences were searched against the NCBI\_nr database using DIAMOND v0.9.22.123  
591 (settings: -more-sensitive -e-value 1e-5 -seq 100 -no-self-hits -taxonmap  
592 prot.accession2taxid.gz)(Buchfink et al., 2015). For all database searches the best hit for each  
593 protein was selected based on the highest e-value and bitscore and all results are summarized  
594 in Supplementary File 1 and full results are in the Data Supplement:  
595 Expanded\_Bacterial\_Core\_Nonribosomal\_analyses/

596 Annotation\_Tables/0\_Annotation\_tables\_full/All\_Zhu\_marker\_annotations\_16-12-2020.tsv.zip.  
597 For InterProScan we report multiple hits corresponding to the individual domains of a protein  
598 using a custom script (parse\_IPRdomains\_vs2\_GO\_2.py).

599  
600 Assigned sequence annotations were summarized and all distinct KOs and Pfams were collected  
601 and counted for each marker gene. KOs and Pfams with their corresponding descriptions were  
602 mapped to the marker gene file downloaded from the repository:  
603 <https://github.com/biocore/wol/blob/master/data/markers/metadata.xlsx> and used in  
604 summarization of the 381 marker gene protein trees (Supplementary File 1).

605  
606 For manual inspection of single marker gene trees, KO and Pfam annotations were mapped to  
607 the tips of the published marker protein trees, downloaded from the repository:  
608 <https://github.com/biocore/wol/tree/master/data/trees/genes>. Briefly, the Genome ID, Pfam, Pfam  
609 description, KO, KO description, and NCBI Taxonomy string were collected from each marker  
610 gene annotation table and were used to generate mapping files unique to each marker gene  
611 phylogeny, which links the Genome ID to the annotation information  
612 (GenomeID|Domain|Pfam|Pfam Description|KO|KO Description). An in-house perl script  
613 `replace_tree_names.pl`

614 ([https://github.com/ndombrowski/Phylogeny\\_tutorial/tree/main/Input\\_files/5\\_required\\_Scripts](https://github.com/ndombrowski/Phylogeny_tutorial/tree/main/Input_files/5_required_Scripts))  
615 was used to append the summarized protein annotations to the corresponding tips in each marker  
616 gene tree. Annotated marker gene phylogenies were manually inspected using the following  
617 criteria including: 1) retention of reciprocal domain monophyly (Archaea and Bacteria) and 2) for  
618 the presence or absence of potential paralogous families. Paralogous groups and misannotated  
619 families present in the gene trees were highlighted and violations of search criteria were recorded  
620 in Supplementary File 1.

621  
622 ***Phylogenetic analyses***

623  
624 *COG assignment for the Core, Non-Ribosomal, and Bacterial marker genes*

625  
626 First, all gene sequences in the three published marker sets (core, non-ribosomal, and bacterial)  
627 were annotated using the NCBI COGs database (version from 2020). Sequences were assigned  
628 a COG family using `hmmsearch v3.3.2` (Finn et al., 2011) (settings: `-E 1e-5`) and the best hit for  
629 each protein sequence was selected based on the highest e-value and bit score. To assign the  
630 appropriate COG family for each marker gene, we quantified the percentage distribution of all  
631 unique COGs per gene, and selected the family representing the majority of sequences in each  
632 marker gene.

633  
634 Accounting for overlap, this resulted in 95 unique COG families from the original 119 total marker  
635 genes across all three published datasets (Supplementary File 2). Orthologues corresponding to  
636 these 95 COG families were identified in the 700 genomes (350 Archaea, 350 Bacteria,  
637 Supplementary File 3) using `hmmsearch v3.3.2` (settings: `-E 1e-5`). The reported BinID and  
638 protein accession were used to extract the sequences from the 700 genomes, which were used  
639 for subsequent phylogenetic analyses.

640  
641 *Marker gene inspection and analysis*

642

643 We aligned these 95 marker gene sequence sets using MAFFT-L-INS-i 7.475 (Katoh and Toh,  
644 2008) and removed poorly-aligned positions with BMGE 1.12 (Criscuolo and Gribaldo, 2010). We  
645 inferred initial maximum likelihood trees (LG+G4+F) for all 95 markers and mapped the KO and  
646 Pfam domains and descriptions, inferred from annotation of the 700 genomes, to the  
647 corresponding tips (see above). Manual inspection took into consideration monophyly of Archaea  
648 and Bacteria and the presence of paralogs, and other signs of contamination (HGT, LBA).  
649 Accordingly, single gene trees that failed to meet reciprocal domain monophyly were excluded,  
650 and any instances of HGT, paralogous sequences, and LBA artefacts were manually removed  
651 from the remaining trees resulting in 54 markers across the three published datasets that were  
652 subject to subsequent phylogenetic analysis (LG+C20+G4+F) and further refinement (see below).

653

#### 654 *Ranking markers based on split score*

655

656 We applied an automated marker gene ranking procedure devised previously (the split score,  
657 (Dombrowski et al., 2020)) to rank each of the 54 markers that satisfied reciprocal monophyly  
658 based on the extent to which they recovered established phylum-, class- or, order-level  
659 relationships within the archaeal and bacterial domains (Supplementary File 4).

660 The script quantifies the number of splits, or occurrences where a taxon fails to cluster within its  
661 expected taxonomic lineage, across all gene phylogenies. Briefly, we assessed monophyletic  
662 clustering using phylum-, class-, and order-level clades within Archaea (Cluster1) in combination  
663 with Cluster0 (phylum) or Cluster3 (i.e. on class-level if defined and otherwise on phylum-level;  
664 Supplementary File 4) for Bacteria. We then ranked the marker genes using the following split  
665 score criteria: the number of splits per taxon and the splits normalized to the species count. The  
666 percentage of split phylogenetic groups was used to determine the highest ranking (top 50%)  
667 markers.

668

#### 669 *Concatenation*

670

671 Based on the split score ranking of the 54 marker genes (above), the top 50% (27 markers,  
672 Supplementary File 4) marker genes were manually inspected using criteria as defined above,  
673 and contaminating sequences were manually removed from the individual sequence files.  
674 Following inspection, marker protein sequences were aligned using MAFFT-L-INS-i 7.475 (Katoh  
675 and Standley, 2013) and trimmed using BMGE (version 1.12, under default settings) (Criscuolo  
676 and Gribaldo, 2010). We concatenated the 27 markers into a supermatrix, which was used to  
677 infer a maximum-likelihood tree (Figure 5, under LG+C60+G4+F), evolutionary rates (see below),  
678 and rate-category supermatrices as well as to perform model performance tests (see below).

679

#### 680 *Constraint analysis*

681

682 We performed a maximum likelihood free topology search using IQ-TREE 2.0.6 (Minh et al., 2020)  
683 under the LG+G4+F model, with 1000 ultrafast bootstrap replicates (Hoang et al., 2018) on each  
684 of the markers from the expanded, bacterial, core and non-ribosomal sets. We also performed a  
685 constrained analysis with the same model, in order to find the maximum likelihood tree in which  
686 Archaea and Bacteria were reciprocally monophyletic. We then compared both trees using the  
687 approximately unbiased (AU) Shimodaira (2002) test in IQ-TREE 2.0.6 (Minh et al., 2020) with  
688 10,000 RELL (Shimodaira, 2002) bootstrap replicates. To evaluate the relationship between  
689 marker gene verticality and AB branch length, we calculated the difference in log-likelihood  
690 between the constrained and unconstrained trees in order to rank the genes from the expanded

691 marker set. We then concatenated the top 20 markers (with the lowest difference in log-likelihood  
692 between the constrained and unconstrained trees) and iteratively added 5 markers with the next  
693 smallest difference in log-likelihood to the concatenate, this was repeated until we had  
694 concatenates up to 100 markers (with the lowest difference in log-likelihood) we inferred trees  
695 under LG+C10+G4+F in IQ-TREE 2.0.6, with 1000 ultrafast bootstrap replicates and calculated  
696 AB length.

697

#### 698 *Site and gene evolutionary rates*

699

700 We inferred rates using the --rate option in IQ-TREE 2.0.6 (Minh et al., 2020) for both the 381  
701 marker concatenation from Zhu (Zhu et al., 2019) and the top 5% of marker genes based on the  
702 results of difference in log-likelihood between the constrained tree and free-tree search in the  
703 constraint analysis (above). We also used this method to explore the differences in rates for the  
704 27 marker set. We built concatenates for sites in the slowest and fastest rate categories, and  
705 inferred branch lengths from each of these concatenates using the tree inferred from the  
706 corresponding dataset as a fixed topology.

707

#### 708 *Substitution model fit*

709

710 Model fit tests were undertaken using the top 5% concatenate described above, with the  
711 alignment being trimmed with BMGE 1.12 (Criscuolo and Gribaldo, 2010) with default settings  
712 (BLOSUM62, entropy 0.5) for all of the analyses except the 'untrimmed' LG+G4+F run, other  
713 models on the trimmed alignment were LG+G4+F, LG+R4+F and  
714 LG+C10,20,30,40,50,60+G4+F, with 1000 ultrafast(Hoang et al., 2018) bootstrap replicates.  
715 Model fitting was done using ModelFinder (Kalyaanamoorthy et al., 2017) in IQ-TREE 2.0.6 (Minh  
716 et al., 2020). For the model testing for the 27 concatenation, we performed a model finder analysis  
717 (-m MFP) including additional complex models of evolution, (i.e.  
718 LG+C60+G4+F, LG+C50+G4+F, LG+C40+G4+F, LG+C30+G4+F, LG+C20+G4+F, LG+C10+G4+  
719 F, LG+G4+F, LG+R4+F) to the default, to find the best fitting model for the analysis. This revealed  
720 that, according to AIC, BIC and cAIC, LG+C60+G4+F was the best fitting model. For comparison,  
721 we also performed analyses using the following models:  
722 LG+G4+F, LG+C20+G4+F, LG+C40+G4+F (Table 1).

723

#### 724 *Molecular clock analyses*

725

726 Molecular clock analyses were devised to test the effect of genetic distance on the inferred age  
727 of LUCA. Following the approach of Zhu et al (Zhu et al., 2019), we subsampled the alignment to  
728 100 species. Five alternative alignments were analysed, representing conserved sites across the  
729 entire alignment, randomly selected sites across the entire alignment, only ribosomal marker  
730 genes, the top 5% of marker genes according to  $\Delta$ LL and the top 5% of marker genes further  
731 trimmed under default settings in BMGE 1.12 (Criscuolo and Gribaldo, 2010). Divergence time  
732 analyses were performed in MCMCTree (Yang, 2007) under a strict clock model. We used the  
733 normal approximation approach, with branch lengths estimated in codeml under the LG+G4  
734 model. In each case, a fixed tree topology was used alongside a single calibration on the  
735 Cyanobacteria-Melainabacteria split. The calibration was modelled as a uniform prior distribution  
736 between 2.5 and 2.6 Ga, with a 2.5% probability that either bound could be exceeded. For each  
737 alignment, four independent MCMC chains were run for 2,000,000 generations to achieve  
738 convergence.

739 We repeated clock analyses under a relaxed (independent rates drawn from a lognormal  
740 distribution) clock model with an expanded sampling of fossil calibration (Supplementary File 5b).  
741 We repeated the analyses with two approaches to defining the maximum age calibration. The first  
742 used the moon-forming impact (4.52Ga), under the provision that no forms of life are likely to have  
743 survived this event. The second relaxed this assumption, instead using the estimated age of the  
744 universe (13.7Ga) as a maximum. Analyses were performed as above.

745

746 *Split score analysis for expanded set markers*

747

748 We used the previously described split score ranking procedure to quantify the number of  
749 taxonomic splits in the 381 marker gene phylogenies generated using the 1000-taxa subsample  
750 defined by Zhu et al. (Zhu et al., 2019). Taxonomic clusters were assigned using the Genome  
751 Taxonomy Database (GTDB) taxonomic ranks downloaded from the repository:  
752 <https://github.com/biocore/wol/tree/master/data/taxonomy/gtdb>. Lineage-level monophyly was  
753 defined at the class-level for all archaea (Arc1) and the phylum level for all bacteria (Bac0)  
754 (Supplementary File 1).

755 Of the original 10,575 genomes, 843 lacked corresponding GTDB assignments. For complete  
756 taxonomic coverage of the dataset, we used the GTDB Toolkit (GTDB-Tk) v0.3.2 (Chaumeil et  
757 al., 2019) to classify these genomes based on GTDB release 202. One of the 843 unclassified  
758 taxa (gid: G000715975) failed the GTDB-Tk quality control check resulting in no assignment,  
759 therefore we manually assigned this taxon to the Actinobacteriota based on the corresponding  
760 affiliation to the Actinobacteria in the NCBI taxonomic ranks provided in the genomic metadata  
761 downloaded from the repository: <https://github.com/biocore/wol/blob/master/data/genomes/>.  
762 Additionally, two archaeal taxa within the Poseidoniiia\_A (gids: G001629155, G001629165)  
763 were manually assigned to the archaeal class MGII (Supplementary File 1).

764

765 *Plotting*

766

767 Split score statistical analyses were performed using R 3.6.3 (R Core Team, 2020). All other  
768 statistical analyses were performed using R 4.0.4 (R Core Team, 2021), and data were plotted  
769 with ggplot2 (Wickham, 2009).

770

## 771 **Data and code availability**

772

773 All of the data, including sequence alignments, trees, annotation files, and scripts associated with  
774 this manuscript have been deposited in the FigShare repository at DOI:  
775 10.6084/m9.figshare.13395470.

## 1018 Acknowledgements

1019  
1020 This work was supported by the Gordon and Betty Moore Foundation through grant GBMF9741  
1021 to TAW, AS and GJSz. ERRM was supported by a Royal Society Enhancement Award  
1022 (RGEA\180199) to TAW. CP was supported by NERC grant NE/P00251X/1 to TAW. TAW  
1023 was supported by a Royal Society University Research Fellowship (URF\R\201024). GJSz  
1024 received funding from the European Research Council under the European Union's Horizon  
1025 2020 research and innovation program under Grant Agreement 714774 and Grant GINOP-  
1026 2.3.2.-15-2016-00057. AS received funding from the Swedish Research Council (VR starting  
1027 grant 2016-03559), the NWO-I foundation of the Netherlands Organisation for Scientific  
1028 Research (WISE fellowship) and the European Research Council (ERC Starting grant 947317,  
1029 ASymbEL). ND was supported through the WISE fellowship, ERC StG 947317 and GBMF9741  
1030 to AS.

## 1031 References

- 1032
- 1033 Adam PS, Borrel G, Brochier-Armanet C, Gribaldo S. 2017. The growing tree of Archaea: new  
1034 perspectives on their diversity, evolution and ecology. *ISME J* **11**:2407–2425.
- 1035 Altschul SF, Madden TL, Schäffer AA, Zhang J, Zhang Z, Miller W, Lipman DJ. 1997. Gapped  
1036 BLAST and PSI-BLAST: a new generation of protein database search programs. *Nucleic  
1037 Acids Res* **25**:3389–3402.
- 1038 Aouad M, Borrel G, Brochier-Armanet C, Gribaldo S. 2019. Evolutionary placement of  
1039 Methanonatronarchaeia. *Nat Microbiol.* **4**, 558-559.
- 1040 Aouad M, Taib N, Oudart A, Lecocq M, Gouy M, Brochier-Armanet C. 2018. Extreme halophilic  
1041 archaea derive from two distinct methanogen Class II lineages. *Mol Phylogenet Evol*  
1042 **127**:46–54.
- 1043 Aramaki T, Blanc-Mathieu R, Endo H, Ohkubo K, Kanehisa M, Goto S, Ogata H. 2020.  
1044 KofamKOALA: KEGG Ortholog assignment based on profile HMM and adaptive score  
1045 threshold. *Bioinformatics* **36**:2251–2252.
- 1046 Baker BJ, De Anda V, Seitz KW, Dombrowski N, Santoro AE, Lloyd KG. 2020. Diversity,  
1047 ecology and evolution of Archaea. *Nat Microbiol* **5**, 887-900.
- 1048 Barboni M, Boehnke P, Keller B, Kohl IE, Schoene B, Young ED, McKeegan KD. 2017. Early  
1049 formation of the Moon 4.51 billion years ago. *Sci Adv* **3**:e1602365.
- 1050 Bateman A, Coin L, Durbin R, Finn RD, Hollich V, Griffiths-Jones S, Khanna A, Marshall M,  
1051 Moxon S, Sonnhammer ELL, Studholme DJ, Yeats C, Eddy SR. 2004. The Pfam protein  
1052 families database. *Nucleic Acids Res* **32**:D138–41.
- 1053 Beam JP, Becraft ED, Brown JM, Schulz F, Jarett JK, Bezuidt O, Poulton NJ, Clark K, Dunfield  
1054 PF, Ravin NV, Spear JR, Hedlund BP, Kormas KA, Sievert SM, Elshahed MS, Barton HA,  
1055 Stott MB, Eisen JA, Moser DP, Onstott TC, Woyke T, Stepanauskas R. 2020. Ancestral  
1056 absence of electron transport chains in Patescibacteria and DPANN. *Front Microbiol* **11**,  
1057 1848
- 1058 Betts HC, Puttick MN, Clark JW, Williams TA, Donoghue PCJ, Pisani D. 2018. Integrated  
1059 genomic and fossil evidence illuminates life's early evolution and eukaryote origin. *Nat Ecol  
1060 Evol* **2**:1556–1562.
- 1061 Brown CT, Hug LA, Thomas BC, Sharon I, Castelle CJ, Singh A, Wilkins MJ, Wrighton KC,  
1062 Williams KH, Banfield JF. 2015. Unusual biology across a group comprising more than 15%  
1063 of domain Bacteria. *Nature* **523**:208–211.
- 1064 Buchfink B, Xie C, Huson DH. 2015. Fast and sensitive protein alignment using DIAMOND. *Nat  
1065 Methods* **12**:59–60.
- 1066 Cantarel BL, Coutinho PM, Rancurel C, Bernard T, Lombard V, Henrissat B. 2009. The  
1067 Carbohydrate-Active EnZymes database (CAZy): an expert resource for Glycogenomics.  
1068 *Nucleic Acids Res* **37**:D233–8.
- 1069 Castelle CJ, Banfield JF. 2018. Major New Microbial Groups Expand Diversity and Alter our  
1070 Understanding of the Tree of Life. *Cell* **172**:1181–1197.
- 1071 Chaumeil P-A, Mussig AJ, Hugenholtz P, Parks DH. 2019. GTDB-Tk: a toolkit to classify  
1072 genomes with the Genome Taxonomy Database. *Bioinformatics.* **36**:1925-1927
- 1073 Ciccarelli FD, Doerks T, von Mering C, Creevey CJ, Snel B, Bork P. 2006. Toward automatic  
1074 reconstruction of a highly resolved tree of life. *Science* **311**:1283–1287.
- 1075 Coleman GA, Davín AA, Mahendrarajah T, Spang A, Hugenholtz P, Szöllösi GJ, Williams TA.  
1076 2021. A rooted phylogeny resolves early bacterial evolution. *Science* **372**.
- 1077 Cox CJ, Foster PG, Hirt RP, Harris SR, Embley TM. 2008. The archaeobacterial origin of  
1078 eukaryotes. *Proc Natl Acad Sci U S A* **105**:20356–20361.
- 1079 Creevey CJ, Doerks T, Fitzpatrick DA, Raes J, Bork P. 2011. Universally distributed single-copy  
1080 genes indicate a constant rate of horizontal transfer. *PLoS One* **6**:e22099.
- 1081 Crisuolo A, Gribaldo S. 2010. BMGE (Block Mapping and Gathering with Entropy): a new  
1082 software for selection of phylogenetic informative regions from multiple sequence  
1083 alignments. *BMC Evol Biol* **10**:210.



- 1084 Da Cunha V, Gaia M, Gabelle D, Nasir A, Forterre P. 2017. Lokiarchaea are close relatives of  
1085 Euryarchaeota, not bridging the gap between prokaryotes and eukaryotes. *PLoS Genet*  
1086 **13**:e1006810.
- 1087 Dagan T, Martin W. 2006. The tree of one percent. *Genome Biol* **7**:118.
- 1088 Davín AA, Tannier E, Williams TA, Boussau B, Daubin V, Szöllösi GJ. 2018. Gene transfers can  
1089 date the tree of life. *Nat Ecol Evol* **2**:904-909.
- 1090 Dombrowski N, Lee J-H, Williams TA, Offre P, Spang A. 2019. Genomic diversity, lifestyles and  
1091 evolutionary origins of DPANN archaea. *FEMS Microbiol Lett* **366**:fnz008.
- 1092 Dombrowski N, Williams TA, Sun J, Woodcroft BJ, Lee J-H, Minh BQ, Rinke C, Spang A. 2020.  
1093 Undinarchaeota illuminate DPANN phylogeny and the impact of gene transfer on archaeal  
1094 evolution. *Nat Commun* **11**:1–15.
- 1095 Drummond AJ, Ho SYW, Phillips MJ, Rambaut A. 2006. Relaxed phylogenetics and dating with  
1096 confidence. *PLoS Biol* **4**:699–710.
- 1097 Feng Y, Neri U, Gosselin S, Louyakis AS, Papke RT, Gophna U, Gogarten JP. 2021. The  
1098 Evolutionary Origins of Extreme Halophilic Archaeal Lineages. *Genome Biol Evol*  
1099 **13**:evab166
- 1100 Finn RD, Clements J, Eddy SR. 2011. HMMER web server: interactive sequence similarity  
1101 searching. *Nucleic Acids Res* **39**:W29–W37.
- 1102 Foster PG. 2004. Modeling compositional heterogeneity. *Syst Biol* **53**:485–495.
- 1103 Fournier GP, Gogarten JP. 2010. Rooting the ribosomal tree of life. *Mol Biol Evol* **27**:1792–  
1104 1801.
- 1105 Fournier GP, Moore KR, Rangel LT, Payette JG, Momper L, Bosak T. 2021. The Archean origin  
1106 of oxygenic photosynthesis and extant cyanobacterial lineages. *Proc Biol Sci*  
1107 **288**:20210675.
- 1108 Galperin MY, Kristensen DM, Makarova KS, Wolf YI, Koonin EV. 2019. Microbial genome  
1109 analysis: the COG approach. *Brief Bioinform* **20**:1063–1070.
- 1110 Gogarten JP, Kibak H, Dittrich P, Taiz L, Bowman EJ, Bowman BJ, Manolson MF, Poole RJ,  
1111 Date T, Oshima T, Konishi J, Denda K, Yoshida M. 1989. Evolution of the vacuolar H+  
1112 ATPase: implications for the origin of eukaryotes. *Proc Natl Acad Sci U S A* **86**:6661–6665.
- 1113 Gouy R, Baurain D, Philippe H. 2015. Rooting the tree of life: the phylogenetic jury is still out.  
1114 *Philos Trans R Soc Lond B Biol Sci* **370**:20140329.
- 1115 Guy L, Ettema TJG. 2011. The archaeal “TACK” superphylum and the origin of eukaryotes.  
1116 *Trends Microbiol* **19**:580–587.
- 1117 Haft DH, Selengut JD, White O. 2003. The TIGRFAMs database of protein families. *Nucleic*  
1118 *Acids Res* **31**:371–373.
- 1119 Hanan BB, Tilton GR. 1987. 60025: relict of primitive lunar crust? *Earth Planet Sci Lett* **84**:15–  
1120 21.
- 1121 Harris JK, Kelley ST, Spiegelman GB, Pace NR. 2003. The genetic core of the universal  
1122 ancestor. *Genome Res* **13**:407–412.
- 1123 Hoang DT, Chernomor O, von Haeseler A, Minh BQ, Vinh LS. 2018. UFBoot2: Improving the  
1124 Ultrafast Bootstrap Approximation. *Mol Biol Evol* **35**:518–522.
- 1125 Horita J, Berndt ME. 1999. Abiogenic methane formation and isotopic fractionation under  
1126 hydrothermal conditions. *Science* **285**:1055–1057.
- 1127 Hug LA, Baker BJ, Anantharaman K, Brown CT, Probst AJ, Castelle CJ, Butterfield CN,  
1128 HERNSDORF AW, Amano Y, Ise K, Suzuki Y, Dudek N, Relman DA, Finstad KM, Amundson  
1129 R, Thomas BC, Banfield JF. 2016. A new view of the tree of life. *Nat Microbiol* **1**:16048
- 1130 Iwabe N, Kuma K, Hasegawa M, Osawa S, Miyata T. 1989. Evolutionary relationship of  
1131 archaeobacteria, eubacteria, and eukaryotes inferred from phylogenetic trees of duplicated  
1132 genes. *Proc Natl Acad Sci U S A* **86**:9355–9359.
- 1133 Jeffroy O, Brinkmann H, Delsuc F, Philippe H. 2006. Phylogenomics: the beginning of  
1134 incongruence? *Trends Genet* **22**:225–231.
- 1135 Jones P, Binns D, Chang H-Y, Fraser M, Li W, McAnulla C, McWilliam H, Maslen J, Mitchell A,  
1136 Nuka G, Pesseat S, Quinn AF, Sangrador-Vegas A, Scheremetjew M, Yong S-Y, Lopez R,  
1137 Hunter S. 2014. InterProScan 5: genome-scale protein function classification.  
1138 *Bioinformatics* **30**:1236–1240.

- 1139 Kalyaanamoorthy S, Minh BQ, Wong TKF, von Haeseler A, Jermiin LS. 2017. ModelFinder: fast  
1140 model selection for accurate phylogenetic estimates. *Nat Methods* **14**:587–589.
- 1141 Kapli P, Flouri T, Telford MJ. 2021. Systematic errors in phylogenetic trees. *Curr Biol* **31**:R59–  
1142 R64.
- 1143 Kapli P, Yang Z, Telford MJ. 2020. Phylogenetic tree building in the genomic age. *Nat Rev*  
1144 *Genet* **21**:428–444.
- 1145 Katoh K, Standley DM. 2013. MAFFT multiple sequence alignment software version 7:  
1146 improvements in performance and usability. *Mol Biol Evol* **30**:772–780.
- 1147 Katoh K, Toh H. 2008. Recent developments in the MAFFT multiple sequence alignment  
1148 program. *Brief Bioinf* **9**:286–298.
- 1149 Kleine T, Palme H, Mezger K, Halliday AN. 2005. Hf-W chronometry of lunar metals and the  
1150 age and early differentiation of the Moon. *Science* **310**:1671–1674.
- 1151 Koonin EV. 2003. Comparative genomics, minimal gene-sets and the last universal common  
1152 ancestor. *Nat Rev Microbiol* **1**:127–136.
- 1153 Lartillot N, Brinkmann H, Philippe H. 2007. Suppression of long-branch attraction artefacts in the  
1154 animal phylogeny using a site-heterogeneous model. *BMC Evol Biol* **7**:S4.
- 1155 Lartillot N, Philippe H. 2004. A Bayesian mixture model for across-site heterogeneities in the  
1156 amino-acid replacement process. *Mol Biol Evol* **21**:1095–1109.
- 1157 Lepland A, Arrhenius G, Cornell D. 2002. Apatite in early Archean Isua supracrustal rocks,  
1158 southern West Greenland: its origin, association with graphite and potential as a biomarker.  
1159 *Precambrian Res* **118**:221–241.
- 1160 Liu Y, Makarova KS, Huang W-C, Wolf YI, Nikolskaya AN, Zhang X, Cai M, Zhang C-J, Xu W,  
1161 Luo Z, Cheng L, Koonin EV, Li M. 2021. Expanded diversity of Asgard archaea and their  
1162 relationships with eukaryotes. *Nature* **593**:553–557.
- 1163 Martijn J, Schön ME, Lind AE, Vosseberg J, Williams TA, Spang A, Ettema TJG. 2020.  
1164 Hikarchaeia demonstrate an intermediate stage in the methanogen-to-halophile transition.  
1165 *Nat Commun* **11**:5490.
- 1166 Martinez-Gutierrez CA, Aylward FO. 2021. Phylogenetic Signal, Congruence, and Uncertainty  
1167 across Bacteria and Archaea. *Mol Biol Evol*. doi:10.1093/molbev/msab254
- 1168 Méheust R, Burstein D, Castelle CJ, Banfield JF. 2019. The distinction of CPR bacteria from  
1169 other bacteria based on protein family content. *Nat Commun* **10**:4173.
- 1170 Minh BQ, Schmidt HA, Chernomor O, Schrempf D, Woodhams MD, von Haeseler A, Lanfear R.  
1171 2020. IQ-TREE 2: New Models and Efficient Methods for Phylogenetic Inference in the  
1172 Genomic Era. *Mol Biol Evol* **37**:1530–1534.
- 1173 Mirarab S, Reaz R, Bayzid MS, Zimmermann T, Swenson MS, Warnow T. 2014. ASTRAL:  
1174 genome-scale coalescent-based species tree estimation. *Bioinformatics* **30**:i541–8.
- 1175 Morel B, Schade P, Lutteropp S, Williams TA, Szöllösi GJ, Stamatakis A. 2021. SpeciesRax: A  
1176 tool for maximum likelihood species tree inference from gene family trees under  
1177 duplication, transfer, and loss. *bioRxiv*. doi:10.1101/2021.03.29.437460
- 1178 Mukherjee S, Seshadri R, Varghese NJ, Eloe-Fadrosh EA, Meier-Kolthoff JP, Göker M, Coates  
1179 RC, Hadjithomas M, Pavlopoulos GA, Paez-Espino D, Yoshikuni Y, Visel A, Whitman WB,  
1180 Garrity GM, Eisen JA, Hugenholtz P, Pati A, Ivanova NN, Woyke T, Klenk H-P, Kyrpides  
1181 NC. 2017. 1,003 reference genomes of bacterial and archaeal isolates expand coverage of  
1182 the tree of life. *Nat Biotechnol* **35**:676–683.
- 1183 Parks DH, Chuvochina M, Waite DW, Rinke C, Skarshewski A, Chaumeil P-A, Hugenholtz P.  
1184 2018. A standardized bacterial taxonomy based on genome phylogeny substantially revises  
1185 the tree of life. *Nat Biotechnol* **36**:996–1004. doi:10.1038/nbt.4229
- 1186 Parks DH, Rinke C, Chuvochina M, Chaumeil P-A, Woodcroft BJ, Evans PN, Hugenholtz P,  
1187 Tyson GW. 2017. Recovery of nearly 8,000 metagenome-assembled genomes  
1188 substantially expands the tree of life. *Nat Microbiol* **2**:1533–1542.
- 1189 Petitjean C, Deschamps P, López-García P, Moreira D. 2014. Rooting the domain archaea by  
1190 phylogenomic analysis supports the foundation of the new kingdom Proteoarchaeota.  
1191 *Genome Biol Evol* **7**:191–204.
- 1192 Planck Collaboration, Aghanim N, Akrami Y, Ashdown M, Aumont J, Baccigalupi C, Ballardini  
1193 M, Banday AJ, Barreiro RB, Bartolo N, Basak S, Battye R, Benabed K, Bernard J-P,

- 1194 Bersanelli M, Bielewicz P, Bock JJ, Bond JR, Borrill J, Bouchet FR, Boulanger F, Bucher M,  
1195 Burigana C, Butler RC, Calabrese E, Cardoso J-F, Carron J, Challinor A, Chiang HC,  
1196 Chluba J, Colombo LPL, Combet C, Contreras D, Crill BP, Cuttaia F, de Bernardis P, de  
1197 Zotti G, Delabrouille J, Delouis J-M, Di Valentino E, Diego JM, Doré O, Douspis M, Ducout  
1198 A, Dupac X, Dusini S, Efstathiou G, Elsner F, Enßlin TA, Eriksen HK, Fantaye Y, Farhang  
1199 M, Fergusson J, Fernandez-Cobos R, Finelli F, Forastieri F, Frailis M, Fraise AA,  
1200 Franceschi E, Frolov A, Galeotta S, Galli S, Ganga K, Génova-Santos RT, Gerbino M,  
1201 Ghosh T, González-Nuevo J, Górski KM, Gratton S, Gruppuso A, Gudmundsson JE,  
1202 Hamann J, Handley W, Hansen FK, Herranz D, Hildebrandt SR, Hivon E, Huang Z, Jaffe  
1203 AH, Jones WC, Karakci A, Keihänen E, Keskitalo R, Kiiveri K, Kim J, Kisner TS, Knox L,  
1204 Krachmalnicoff N, Kunz M, Kurki-Suonio H, Lagache G, Lamarre J-M, Lasenby A, Lattanzi  
1205 M, Lawrence CR, Le Jeune M, Lemos P, Lesgourgues J, Levrier F, Lewis A, Liguori M, Lilje  
1206 PB, Lilley M, Lindholm V, López-Cañiego M, Lubin PM, Ma Y-Z, Macías-Pérez JF, Maggio  
1207 G, Maino D, Mandolesi N, Mangilli A, Marcos-Caballero A, Maris M, Martin PG, Martinelli  
1208 M, Martínez-González E, Matarrese S, Mauri N, McEwen JD, Meinhold PR, Melchiorri A,  
1209 Mennella A, Migliaccio M, Millea M, Mitra S, Miville-Deschênes M-A, Molinari D, Montier L,  
1210 Morgante G, Moss A, Natoli P, Nørgaard-Nielsen HU, Pagano L, Paoletti D, Partridge B,  
1211 Patanchon G, Peiris HV, Perrotta F, Pettorino V, Piacentini F, Polastri L, Polenta G, Puget  
1212 J-L, Rachen JP, Reinecke M, Remazeilles M, Renzi A, Rocha G, Rosset C, Roudier G,  
1213 Rubiño-Martín JA, Ruiz-Granados B, Salvati L, Sandri M, Savelainen M, Scott D, Shellard  
1214 EPS, Sirignano C, Sirri G, Spencer LD, Sunyaev R, Suur-Uski A-S, Tauber JA, Tavagnacco  
1215 D, Tenti M, Toffolatti L, Tomasi M, Trombetti T, Valenziano L, Valiviita J, Van Tent B, Vibert  
1216 L, Vielva P, Villa F, Vittorio N, Wandelt BD, Wehus IK, White M, White SDM, Zacchei A,  
1217 Zonca A. 2018. Planck 2018 results. VI. Cosmological parameters. *arXiv [astro-phCO]*.  
1218 doi:10.1051/0004-6361/201833910
- 1219 Pühler G, Leffers H, Gropp F, Palm P, Klenk HP, Lottspeich F, Garrett RA, Zillig W. 1989.  
1220 Archaeobacterial DNA-dependent RNA polymerases testify to the evolution of the eukaryotic  
1221 nuclear genome. *Proc Natl Acad Sci U S A* **86**:4569–4573.
- 1222 Puigbò P, Wolf YI, Koonin EV. 2009. Search for a “Tree of Life” in the thicket of the phylogenetic  
1223 forest. *J Biol* **8**:59.
- 1224 Quang LS, Gascuel O, Lartillot N. 2008. Empirical profile mixture models for phylogenetic  
1225 reconstruction. *Bioinformatics* **24**:2317–2323.
- 1226 Ramulu HG, Groussin M, Talla E, Planel R, Daubin V, Brochier-Armanet C. 2014. Ribosomal  
1227 proteins: toward a next generation standard for prokaryotic systematics? *Mol Phylogenet*  
1228 *Evol* **75**:103–117.
- 1229 Rawlings ND, Barrett AJ, Finn R. 2016. Twenty years of the MEROPS database of proteolytic  
1230 enzymes, their substrates and inhibitors. *Nucleic Acids Res* **44**:D343–50.
- 1231 Raymann K, Brochier-Armanet C, Gribaldo S. 2015. The two-domain tree of life is linked to a  
1232 new root for the Archaea. *Proc Natl Acad Sci U S A* **112**:6670–6675.
- 1233 R Core Team. 2021. R: A language and environment for statistical computing. R Foundation for  
1234 Statistical Computing, Vienna, Austria. URL <https://www.R-project.org/>.
- 1235 Rinke C, Chuvochina M, Mussig AJ, Chaumeil P-A, Davín AA, Waite DW, Whitman WB, Parks  
1236 DH, Hugenholtz P. 2021. A standardized archaeal taxonomy for the Genome Taxonomy  
1237 Database. *Nat Microbiol* **6**:946–959.
- 1238 Saier MH Jr, Tran CV, Barabote RD. 2006. TCDB: the Transporter Classification Database for  
1239 membrane transport protein analyses and information. *Nucleic Acids Res* **34**:D181–6.
- 1240 Salichos L, Rokas A. 2013. Inferring ancient divergences requires genes with strong  
1241 phylogenetic signals. *Nature* **497**:327–331.
- 1242 Satkoski AM, Beukes NJ, Li W, Beard BL, Johnson CM. 2015. A redox-stratified ocean 3.2  
1243 billion years ago. *Earth Planet Sci Lett* **430**:43–53.
- 1244 Schrepf D, Lartillot N, Szöllösi G. 2020. Scalable empirical mixture models that account for  
1245 across-site compositional heterogeneity. *Mol Biol Evol* **37**:3616–3631.
- 1246 Seemann T. 2014. Prokka: rapid prokaryotic genome annotation. *Bioinformatics* **30**:2068–2069.
- 1247 Segata N, Börnigen D, Morgan XC, Huttenhower C. 2013. PhyloPhlAn is a new method for  
1248 improved phylogenetic and taxonomic placement of microbes. *Nat Commun* **4**:2304.

- 1249 Shih PM, Hemp J, Ward LM, Matzke NJ, Fischer WW. 2017. Crown group Oxyphotobacteria  
1250 postdate the rise of oxygen. *Geobiology* **15**:19–29.
- 1251 Shimodaira H. 2002. An approximately unbiased test of phylogenetic tree selection. *Syst Biol*  
1252 **51**:492–508.
- 1253 Søndergaard D, Pedersen CNS, Greening C. 2016. HydDB: A web tool for hydrogenase  
1254 classification and analysis. *Sci Rep* **6**:34212.
- 1255 Sorokin DY, Makarova KS, Abbas B, Ferrer M, Golyshin PN, Galinski EA, Ciordia S, Mena MC,  
1256 Merkel AY, Wolf YI, van Loosdrecht MCM, Koonin EV. 2017. Discovery of extremely  
1257 halophilic, methyl-reducing euryarchaea provides insights into the evolutionary origin of  
1258 methanogenesis. *Nat Microbiol* **2**:17081.
- 1259 Spang A, Saw JH, Jørgensen SL, Zaremba-Niedzwiedzka K, Martijn J, Lind AE, van Eijk R,  
1260 Schleper C, Guy L, Ettema TJG. 2015. Complex archaea that bridge the gap between  
1261 prokaryotes and eukaryotes. *Nature* **521**:173–179.
- 1262 Sugitani K, Mimura K, Takeuchi M, Lepot K, Ito S. 2015. Early evolution of large micro-  
1263 organisms with cytological complexity revealed by microanalyses of 3.4 Ga organic-walled  
1264 microfossils. *Geobiology* **13**:507–521.
- 1265 Szöllösi GJ, Höhna S, Williams TA, Schrempf D, Daubin V, Boussau B. 2021. Relative time  
1266 constraints improve molecular dating. *Syst Biol*. doi:10.1093/sysbio/syab084
- 1267 Szöllösi GJ, Rosikiewicz W, Boussau B, Tannier E, Daubin V. 2013. Efficient exploration of the  
1268 space of reconciled gene trees. *Syst Biol* **62**:901–912.
- 1269 Taib N, Megrian D, Witwinowski J, Adam P, Poppleton D, Borrel G, Beloin C, Gribaldo S. 2020.  
1270 Genome-wide analysis of the Firmicutes illuminates the diderm/monoderm transition. *Nat*  
1271 *Ecol Evol* **4**:1661-1672.
- 1272 Theobald DL. 2010. A formal test of the theory of universal common ancestry. *Nature* **465**:219–  
1273 222.
- 1274 Tourasse NJ, Gouy M. 1999. Accounting for Evolutionary Rate Variation among Sequence Sites  
1275 Consistently Changes Universal Phylogenies Deduced from rRNA and Protein-Coding  
1276 Genes. *Mol Phylogenet Evol* **13**:159–168.
- 1277 Tria FDK, Landan G, Dagan T. 2017. Phylogenetic rooting using minimal ancestor deviation.  
1278 *Nat Ecol Evol* **1**:193.
- 1279 Valas RE, Bourne PE. 2011. The origin of a derived superkingdom: how a gram-positive  
1280 bacterium crossed the desert to become an archaeon. *Biol Direct* **6**:16.
- 1281 van Zuilen MA, Lepland A, Arrhenius G. 2002. Reassessing the evidence for the earliest traces  
1282 of life. *Nature* **418**:627–630.
- 1283 Wacey D. 2009. Early Life on Earth: A Practical Guide. Amsterdam, The Netherlands: Springer  
1284 Science & Business Media.
- 1285 Wang H-C, Li K, Susko E, Roger AJ. 2008. A class frequency mixture model that adjusts for  
1286 site-specific amino acid frequencies and improves inference of protein phylogeny. *BMC*  
1287 *Evol Biol* **8**:331.
- 1288 Wang H-C, Minh BQ, Susko E, Roger AJ. 2018. Modeling Site Heterogeneity with Posterior  
1289 Mean Site Frequency Profiles Accelerates Accurate Phylogenomic Estimation. *Syst Biol*  
1290 **67**:216–235.
- 1291 Wickham H. 2009. ggplot2: Elegant graphics for data analysis. New York, USA: Springer-Verlag
- 1292 Williams TA, Foster PG, Nye TMW, Cox CJ, Embley TM. 2012. A congruent phylogenomic  
1293 signal places eukaryotes within the Archaea. *Proc Biol Sci* **279**:4870–4879.
- 1294 Williams TA, Cox CJ, Foster PG, Szöllösi GJ, Embley TM. 2020. Phylogenomics provides  
1295 robust support for a two-domains tree of life. *Nat Ecol Evol* **4**:138–147.
- 1296 Williams TA, Schrempf D, Szöllösi GJ, Cox CJ, Foster PG, Embley TM. 2021. Inferring the deep  
1297 past from molecular data. *Genome Biol Evol*. **13**:evab067. doi:10.1093/gbe/evab067
- 1298 Williams TA, Szöllösi GJ, Spang A, Foster PG, Heaps SE, Boussau B, Ettema TJG, Embley  
1299 TM. 2017. Integrative modeling of gene and genome evolution roots the archaeal tree of  
1300 life. *Proc Natl Acad Sci U S A* **114**:E4602–E4611.
- 1301 Wolfe JM, Fournier GP. 2018. Horizontal gene transfer constrains the timing of methanogen  
1302 evolution. *Nat Ecol Evol* **2**: 897-903. doi:10.1038/s41559-018-0513-7
- 1303 Yang Z. 2007. PAML 4: phylogenetic analysis by maximum likelihood. *Mol Biol Evol* **24**:1586–

- 1304 1591.  
1305 Zaremba-Niedzwiedzka K, Caceres EF, Saw JH, Bäckström D, Juzokaite L, Vancaester E, Seitz  
1306 KW, Anantharaman K, Starnawski P, Kjeldsen KU, Stott MB, Nunoura T, Banfield JF,  
1307 Schramm A, Baker BJ, Spang A, Ettema TJG. 2017. Asgard archaea illuminate the origin  
1308 of eukaryotic cellular complexity. *Nature* **541**:353.  
1309 Zhang C, Scornavacca C, Molloy EK, Mirarab S. 2020. ASTRAL-Pro: Quartet-Based Species-  
1310 Tree Inference despite Paralogy. *Mol Biol Evol* **37**:3292-3307  
1311 Zhu Q, Mai U, Pfeiffer W, Janssen S, Asnicar F, Sanders JG, Belda-Ferre P, Al-Ghalith GA,  
1312 Kopylova E, McDonald D, Kosciolk T, Yin JB, Huang S, Salam N, Jiao J-Y, Wu Z, Xu ZZ,  
1313 Cantrell K, Yang Y, Sayyari E, Rabiee M, Morton JT, Podell S, Knights D, Li W-J,  
1314 Huttenhower C, Segata N, Smarr L, Mirarab S, Knight R. 2019. Phylogenomics of 10,575  
1315 genomes reveals evolutionary proximity between domains Bacteria and Archaea. *Nat*  
1316 *Commun* **10**:5477.
