# Supplementary material for: An estimate of the deepest branches of the tree of life from ancient vertically-evolving genes
Source: bioRxiv preprint, doi:10.1101/2021.01.19.427276, version 4 (2021-11-26)
Supplement: Supplementary File 4 [file 427276_file28.xlsx]

## Sheet: README
Sheet	Description
Monophyletic_lineage_definition	Monophyletic lineages for Archaea and Bacteria used for split-score ranking procedure (for the Williams, Petitjean, and Coleman markers), specifically the first field in the taxonomic string. Arc1 clades represent Archaeal classes and orders as described in Dombrowski et al., 2020. Bac0 clades correspond to Bacterial phyla and Bac3 corresponds to Bacterial class with the phyla substituted for sel…
95_Arc1Bac0_stats_summary	Marker gene ranking statistics on the 95 markers using the split-scores based on Arc1Bac0 monophyletic clade definitions.
95_Arc1Bac3_stats_summary	Marker gene ranking statistics on the 95 markers using the split-scores based on Arc1Bac3 monophyletic clade definitions.
27Top_v3_Arc1Bac0_stats_summary	Marker gene ranking statistics on the Top 50% (27 best) markers after manual inspection, using the split-scores based on Arc1Bac0 monophyletic clade definitions.
27Top_v3_Arc1Bac3_stats_summary	Marker gene ranking statistics on the Top 50% (27 best) markers after manual inspection, using the split-scores based on Arc1Bac3 monophyletic clade definitions.
27Worst_Arc1Bac0_stats_summary	Marker gene ranking statistics on the Bottom 50% (27 worst) markers after manual inspection, using the split-scores based on Arc1Bac0 monophyletic clade definitions.
27Worst_Arc1Bac3_stats_summary	Marker gene ranking statistics on the Bottom 50% (27 worst) markers after manual inspection, using the split-scores based on Arc1Bac3 monophyletic clade definitions.
Splitscore_ABlength_treelength	Splitscore to AB-branch length calculations. Here the average total split-score to species was calculated using the total-splits-to-species from Arc1Bac0 and Arc1Bac3 (27Top_V2_Arc1Bac0 and 27Top_V2_Arc1Bac0). AB length (col H) was used to generate Fig 3.
Zhu_gtdb_ranks_9732taxa	GTDB taxonomic ranks for 9732 (or the original 10,575) taxa provided by the Zhu et al. (2019).
gtdbtk.arcbac.r202.summary.meta	GTDB-Toolkit (Tk) v3.2.0 , release2020; taxonomic assignments for 843 taxa excluded from the original GTDB metadata due to poor classification.
gtdb_tax_full_clade_definitions	Combined GTDB taxonomic metadata for all 10,575 taxa (9732 original, 843 classified via GTDB-Tk) included in Zhu et al. (2019). Manual changes to three taxa (gids: G001715285, G001629155, G001629165) are highlighted in orange. Monophyletic clade definitions for SplitScore analysis are defined in column K (Cluster1Arc_Cluster0Bac) and column B (Kingdom(gtdb) --> Domain). Taxonomic strings for Spli…
names_to_replace_Arc1Bac0_final	Mapping file that links the gid to the taxonomic string used in the SplitScore analysis using Archaeal class and Bacterial phylum.
names_to_replace_Domain_final	Mapping file that links the gid to the taxonomic string used in the SplitScore analysis using Domain (Bacteria/Archaea).
unique_clades	Unique phylum- and class-level definitions of all 10,575 taxa in the Zhu et al. (2019) dataset.
distribution_by_phyla	Count and percent distribution of phylum-level assignments for all 10,575 taxa.
distribution_by_class	Count and percent distribution of class-level assignments for all 10,575 taxa.
Arc1Bac0_Zhu_stats_summary	SplitScore statistical summary used to rank markers by the taxonomic splits at the Archaeal class-level and Bacterial phylum-level.
ArcBac_Domain_Zhu_stats_summary	Splitscore statisical summary used to rank markers based on taxonomic splits at the Domain-level. 325 of the original 381 markers are present in this analysis, with 56 markers excluded due to no Archaeal representatives.
ArcBac_Domain_Zhu_stats_sum_all	SplitScore statistical summary used to rank markers by the taxonomic splits using Domain assignments for Archaea and Bacteria; this table has metadata for all markers including those that were not included in the statistical analysis due to lack of Archaea.
list_of_bad_markers_by_Domain	List of 56 markers that did not contain any Archaeal representatives.

## Sheet: Monophyletic_lineage_definition
accession	Cluster0	Cluster1	Cluster2	Cluster3	Domain	Superphylum	Phylum	Class	Order	Family	Genus	Species	BinID	Arc1Bac0_Names_to_replace_for_stats (using Cluster1 for Archaea, Cluster0 (phylum) for Bacteria)	Arc1Bac3_Names_to_replace_for_stats (using Cluster1 for Archaea, and Cluster3 (class/phylum) for Bacteria)
GCA_000306765.2	Halobacteria	Haloferacales	Halobacteria	Haloferacales	Archaea	Euryarchaeota	Euryarchaeota	Halobacteria	Haloferacales	Haloferacaceae	Haloferax	Haloferax_mediterranei	GCA_000306765	Haloferacales|Euryarchaeota|Euryarchaeota|Halobacteria|Haloferacales|Haloferacaceae|Haloferax|Haloferax_mediterranei|GCA_000306765	Haloferacales|Euryarchaeota|Euryarchaeota|Halobacteria|Haloferacales|Haloferacaceae|Haloferax|Haloferax_mediterranei|GCA_000306765
GCA_000025685.1	Halobacteria	Haloferacales	Halobacteria	Haloferacales	Archaea	Euryarchaeota	Euryarchaeota	Halobacteria	Haloferacales	Haloferacaceae	Haloferax	Haloferax_volcanii	GCA_000025685	Haloferacales|Euryarchaeota|Euryarchaeota|Halobacteria|Haloferacales|Haloferacaceae|Haloferax|Haloferax_volcanii|GCA_000025685	Haloferacales|Euryarchaeota|Euryarchaeota|Halobacteria|Haloferacales|Haloferacaceae|Haloferax|Haloferax_volcanii|GCA_000025685
GCA_000172995.2	Halobacteria	Haloferacales	Halobacteria	Haloferacales	Archaea	Euryarchaeota	Euryarchaeota	Halobacteria	Haloferacales	Haloferacaceae	Halogeometricum	Halogeometricum_borinquense	GCA_000172995	Haloferacales|Euryarchaeota|Euryarchaeota|Halobacteria|Haloferacales|Haloferacaceae|Halogeometricum|Halogeometricum_borinquense|GCA_000172995	Haloferacales|Euryarchaeota|Euryarchaeota|Halobacteria|Haloferacales|Haloferacaceae|Halogeometricum|Halogeometricum_borinquense|GCA_000172995
GCA_003351065.1	Halobacteria	Haloferacales	Halobacteria	Haloferacales	Archaea	Euryarchaeota	Euryarchaeota	Halobacteria	Haloferacales	Haloferacaceae	Halopelagius	Halopelagius_longus	GCA_003351065	Haloferacales|Euryarchaeota|Euryarchaeota|Halobacteria|Haloferacales|Haloferacaceae|Halopelagius|Halopelagius_longus|GCA_003351065	Haloferacales|Euryarchaeota|Euryarchaeota|Halobacteria|Haloferacales|Haloferacaceae|Halopelagius|Halopelagius_longus|GCA_003351065
GCA_900107665.1	Halobacteria	Haloferacales	Halobacteria	Haloferacales	Archaea	Euryarchaeota	Euryarchaeota	Halobacteria	Haloferacales	Haloferacaceae	Haloplanus	Haloplanus_vescus	GCA_900107665	Haloferacales|Euryarchaeota|Euryarchaeota|Halobacteria|Haloferacales|Haloferacaceae|Haloplanus|Haloplanus_vescus|GCA_900107665	Haloferacales|Euryarchaeota|Euryarchaeota|Halobacteria|Haloferacales|Haloferacaceae|Haloplanus|Haloplanus_vescus|GCA_900107665
GCA_001469955.1	Halobacteria	Haloferacales	Halobacteria	Haloferacales	Archaea	Euryarchaeota	Euryarchaeota	Halobacteria	Haloferacales	Haloferacaceae	Haloprofundus	Haloprofundus_marisrubri	GCA_001469955	Haloferacales|Euryarchaeota|Euryarchaeota|Halobacteria|Haloferacales|Haloferacaceae|Haloprofundus|Haloprofundus_marisrubri|GCA_001469955	Haloferacales|Euryarchaeota|Euryarchaeota|Halobacteria|Haloferacales|Haloferacaceae|Haloprofundus|Haloprofundus_marisrubri|GCA_001469955
GCA_000237865.1	Halobacteria	Haloferacales	Halobacteria	Haloferacales	Archaea	Euryarchaeota	Euryarchaeota	Halobacteria	Haloferacales	Haloferacaceae	Haloquadratum	Haloquadratum_walsbyi	GCA_000237865	Haloferacales|Euryarchaeota|Euryarchaeota|Halobacteria|Haloferacales|Haloferacaceae|Haloquadratum|Haloquadratum_walsbyi|GCA_000237865	Haloferacales|Euryarchaeota|Euryarchaeota|Halobacteria|Haloferacales|Haloferacaceae|Haloquadratum|Haloquadratum_walsbyi|GCA_000237865
GCA_002788215.1	Halobacteria	Haloferacales	Halobacteria	Haloferacales	Archaea	Euryarchaeota	Euryarchaeota	Halobacteria	Haloferacales	Halorubraceae	Halohasta	Halohasta_litchfieldiae	GCA_002788215	Haloferacales|Euryarchaeota|Euryarchaeota|Halobacteria|Haloferacales|Halorubraceae|Halohasta|Halohasta_litchfieldiae|GCA_002788215	Haloferacales|Euryarchaeota|Euryarchaeota|Halobacteria|Haloferacales|Halorubraceae|Halohasta|Halohasta_litchfieldiae|GCA_002788215
GCA_001282785.1	Halobacteria	Haloferacales	Halobacteria	Haloferacales	Archaea	Euryarchaeota	Euryarchaeota	Halobacteria	Haloferacales	Halorubraceae	Halolamina	Halolamina_sediminis	GCA_001282785	Haloferacales|Euryarchaeota|Euryarchaeota|Halobacteria|Haloferacales|Halorubraceae|Halolamina|Halolamina_sediminis|GCA_001282785	Haloferacales|Euryarchaeota|Euryarchaeota|Halobacteria|Haloferacales|Halorubraceae|Halolamina|Halolamina_sediminis|GCA_001282785
GCA_900108505.1	Halobacteria	Haloferacales	Halobacteria	Haloferacales	Archaea	Euryarchaeota	Euryarchaeota	Halobacteria	Haloferacales	Halorubraceae	Halopenitus	Halopenitus_malekzadehii	GCA_900108505	Haloferacales|Euryarchaeota|Euryarchaeota|Halobacteria|Haloferacales|Halorubraceae|Halopenitus|Halopenitus_malekzadehii|GCA_900108505	Haloferacales|Euryarchaeota|Euryarchaeota|Halobacteria|Haloferacales|Halorubraceae|Halopenitus|Halopenitus_malekzadehii|GCA_900108505
GCA_000337035.1	Halobacteria	Haloferacales	Halobacteria	Haloferacales	Archaea	Euryarchaeota	Euryarchaeota	Halobacteria	Haloferacales	Halorubraceae	Halorubrum	Halorubrum_coriense	GCA_000337035	Haloferacales|Euryarchaeota|Euryarchaeota|Halobacteria|Haloferacales|Halorubraceae|Halorubrum|Halorubrum_coriense|GCA_000337035	Haloferacales|Euryarchaeota|Euryarchaeota|Halobacteria|Haloferacales|Halorubraceae|Halorubrum|Halorubrum_coriense|GCA_000337035
GCA_002252985.1	Halobacteria	Haloferacales	Halobacteria	Haloferacales	Archaea	Euryarchaeota	Euryarchaeota	Halobacteria	Haloferacales	Halorubraceae	Halorubrum	Halorubrum_halodurans	GCA_002252985	Haloferacales|Euryarchaeota|Euryarchaeota|Halobacteria|Haloferacales|Halorubraceae|Halorubrum|Halorubrum_halodurans|GCA_002252985	Haloferacales|Euryarchaeota|Euryarchaeota|Halobacteria|Haloferacales|Halorubraceae|Halorubrum|Halorubrum_halodurans|GCA_002252985
GCA_000022205.1	Halobacteria	Haloferacales	Halobacteria	Haloferacales	Archaea	Euryarchaeota	Euryarchaeota	Halobacteria	Haloferacales	Halorubraceae	Halorubrum	Halorubrum_lacusprofundi	GCA_000022205	Haloferacales|Euryarchaeota|Euryarchaeota|Halobacteria|Haloferacales|Halorubraceae|Halorubrum|Halorubrum_lacusprofundi|GCA_000022205	Haloferacales|Euryarchaeota|Euryarchaeota|Halobacteria|Haloferacales|Halorubraceae|Halorubrum|Halorubrum_lacusprofundi|GCA_000022205
GCA_000337915.1	Halobacteria	Haloferacales	Halobacteria	Haloferacales	Archaea	Euryarchaeota	Euryarchaeota	Halobacteria	Haloferacales	Halorubraceae	Halorubrum	Halorubrum_saccharovorum	GCA_000337915	Haloferacales|Euryarchaeota|Euryarchaeota|Halobacteria|Haloferacales|Halorubraceae|Halorubrum|Halorubrum_saccharovorum|GCA_000337915	Haloferacales|Euryarchaeota|Euryarchaeota|Halobacteria|Haloferacales|Halorubraceae|Halorubrum|Halorubrum_saccharovorum|GCA_000337915
GCA_002906575.1	Halobacteria	Haloferacales	Halobacteria	Haloferacales	Archaea	Euryarchaeota	Euryarchaeota	Halobacteria	Haloferacales	Halorubraceae	Salinigranum	Salinigranum_rubrum	GCA_002906575	Haloferacales|Euryarchaeota|Euryarchaeota|Halobacteria|Haloferacales|Halorubraceae|Salinigranum|Salinigranum_rubrum|GCA_002906575	Haloferacales|Euryarchaeota|Euryarchaeota|Halobacteria|Haloferacales|Halorubraceae|Salinigranum|Salinigranum_rubrum|GCA_002906575
GCA_000755225.1	Halobacteria	Halobacteriales	Halobacteria	Halobacteriales	Archaea	Euryarchaeota	Euryarchaeota	Halobacteria	Halobacteriales	Haloarculaceae	Halapricum	Halapricum_salinum	GCA_000755225	Halobacteriales|Euryarchaeota|Euryarchaeota|Halobacteria|Halobacteriales|Haloarculaceae|Halapricum|Halapricum_salinum|GCA_000755225	Halobacteriales|Euryarchaeota|Euryarchaeota|Halobacteria|Halobacteriales|Haloarculaceae|Halapricum|Halapricum_salinum|GCA_000755225
GCA_003634715.1	Halobacteria	Halobacteriales	Halobacteria	Halobacteriales	Archaea	Euryarchaeota	Euryarchaeota	Halobacteria	Halobacteriales	Haloarculaceae	Haloarcula	Haloarcula_quadrata	GCA_003634715	Halobacteriales|Euryarchaeota|Euryarchaeota|Halobacteria|Halobacteriales|Haloarculaceae|Haloarcula|Haloarcula_quadrata|GCA_003634715	Halobacteriales|Euryarchaeota|Euryarchaeota|Halobacteria|Halobacteriales|Haloarculaceae|Haloarcula|Haloarcula_quadrata|GCA_003634715
GCA_900114435.1	Halobacteria	Halobacteriales	Halobacteria	Halobacteriales	Archaea	Euryarchaeota	Euryarchaeota	Halobacteria	Halobacteriales	Haloarculaceae	Halomicrobium	Halomicrobium_zhouii	GCA_900114435	Halobacteriales|Euryarchaeota|Euryarchaeota|Halobacteria|Halobacteriales|Haloarculaceae|Halomicrobium|Halomicrobium_zhouii|GCA_900114435	Halobacteriales|Euryarchaeota|Euryarchaeota|Halobacteria|Halobacteriales|Haloarculaceae|Halomicrobium|Halomicrobium_zhouii|GCA_900114435
GCA_000470655.1	Halobacteria	Halobacteriales	Halobacteria	Halobacteriales	Archaea	Euryarchaeota	Euryarchaeota	Halobacteria	Halobacteriales	Haloarculaceae	Halorhabdus	Halorhabdus_tiamatea	GCA_000470655	Halobacteriales|Euryarchaeota|Euryarchaeota|Halobacteria|Halobacteriales|Haloarculaceae|Halorhabdus|Halorhabdus_tiamatea|GCA_000470655	Halobacteriales|Euryarchaeota|Euryarchaeota|Halobacteria|Halobacteriales|Haloarculaceae|Halorhabdus|Halorhabdus_tiamatea|GCA_000470655
GCA_000337455.1	Halobacteria	Halobacteriales	Halobacteria	Halobacteriales	Archaea	Euryarchaeota	Euryarchaeota	Halobacteria	Halobacteriales	Haloarculaceae	Halosimplex	Halosimplex_carlsbadense	GCA_000337455	Halobacteriales|Euryarchaeota|Euryarchaeota|Halobacteria|Halobacteriales|Haloarculaceae|Halosimplex|Halosimplex_carlsbadense|GCA_000337455	Halobacteriales|Euryarchaeota|Euryarchaeota|Halobacteria|Halobacteriales|Haloarculaceae|Halosimplex|Halosimplex_carlsbadense|GCA_000337455
GCA_000026045.1	Halobacteria	Halobacteriales	Halobacteria	Halobacteriales	Archaea	Euryarchaeota	Euryarchaeota	Halobacteria	Halobacteriales	Haloarculaceae	Natronomonas	Natronomonas_pharaonis	GCA_000026045	Halobacteriales|Euryarchaeota|Euryarchaeota|Halobacteria|Halobacteriales|Haloarculaceae|Natronomonas|Natronomonas_pharaonis|GCA_000026045	Halobacteriales|Euryarchaeota|Euryarchaeota|Halobacteria|Halobacteriales|Haloarculaceae|Natronomonas|Natronomonas_pharaonis|GCA_000026045
GCA_000187225.2	Halobacteria	Halobacteriales	Halobacteria	Halobacteriales	Archaea	Euryarchaeota	Euryarchaeota	Halobacteria	Halobacteriales	Halobacteriaceae	Haladaptatus	Haladaptatus_paucihalophilus	GCA_000187225	Halobacteriales|Euryarchaeota|Euryarchaeota|Halobacteria|Halobacteriales|Halobacteriaceae|Haladaptatus|Haladaptatus_paucihalophilus|GCA_000187225	Halobacteriales|Euryarchaeota|Euryarchaeota|Halobacteria|Halobacteriales|Halobacteriaceae|Haladaptatus|Haladaptatus_paucihalophilus|GCA_000187225
GCA_000196895.1	Halobacteria	Halobacteriales	Halobacteria	Halobacteriales	Archaea	Euryarchaeota	Euryarchaeota	Halobacteria	Halobacteriales	Halobacteriaceae	Halalkalicoccus	Halalkalicoccus_jeotgali	GCA_000196895	Halobacteriales|Euryarchaeota|Euryarchaeota|Halobacteria|Halobacteriales|Halobacteriaceae|Halalkalicoccus|Halalkalicoccus_jeotgali|GCA_000196895	Halobacteriales|Euryarchaeota|Euryarchaeota|Halobacteria|Halobacteriales|Halobacteriaceae|Halalkalicoccus|Halalkalicoccus_jeotgali|GCA_000196895
GCA_001011115.1	Halobacteria	Halobacteriales	Halobacteria	Halobacteriales	Archaea	Euryarchaeota	Euryarchaeota	Halobacteria	Halobacteriales	Halobacteriaceae	Halanaeroarchaeum	Halanaeroarchaeum_sulfurireducens	GCA_001011115	Halobacteriales|Euryarchaeota|Euryarchaeota|Halobacteria|Halobacteriales|Halobacteriaceae|Halanaeroarchaeum|Halanaeroarchaeum_sulfurireducens|GCA_001011115	Halobacteriales|Euryarchaeota|Euryarchaeota|Halobacteria|Halobacteriales|Halobacteriaceae|Halanaeroarchaeum|Halanaeroarchaeum_sulfurireducens|GCA_001011115
GCA_000006805.1	Halobacteria	Halobacteriales	Halobacteria	Halobacteriales	Archaea	Euryarchaeota	Euryarchaeota	Halobacteria	Halobacteriales	Halobacteriaceae	Halobacterium	Halobacterium_salinarum	GCA_000006805	Halobacteriales|Euryarchaeota|Euryarchaeota|Halobacteria|Halobacteriales|Halobacteriaceae|Halobacterium|Halobacterium_salinarum|GCA_000006805	Halobacteriales|Euryarchaeota|Euryarchaeota|Halobacteria|Halobacteriales|Halobacteriaceae|Halobacterium|Halobacterium_salinarum|GCA_000006805
GCA_001886955.1	Halobacteria	Halobacteriales	Halobacteria	Halobacteriales	Archaea	Euryarchaeota	Euryarchaeota	Halobacteria	Halobacteriales	Halobacteriaceae	Halodesulfurarchaeum	Halodesulfurarchaeum_formicicum	GCA_001886955	Halobacteriales|Euryarchaeota|Euryarchaeota|Halobacteria|Halobacteriales|Halobacteriaceae|Halodesulfurarchaeum|Halodesulfurarchaeum_formicicum|GCA_001886955	Halobacteriales|Euryarchaeota|Euryarchaeota|Halobacteria|Halobacteriales|Halobacteriaceae|Halodesulfurarchaeum|Halodesulfurarchaeum_formicicum|GCA_001886955
GCA_003675855.1	Halobacteria	Halobacteriales	Halobacteria	Halobacteriales	Archaea	Euryarchaeota	Euryarchaeota	Halobacteria	Halobacteriales	Halobacteriaceae	Halostella	Halostella_salina	GCA_003675855	Halobacteriales|Euryarchaeota|Euryarchaeota|Halobacteria|Halobacteriales|Halobacteriaceae|Halostella|Halostella_salina|GCA_003675855	Halobacteriales|Euryarchaeota|Euryarchaeota|Halobacteria|Halobacteriales|Halobacteriaceae|Halostella|Halostella_salina|GCA_003675855
GCA_900100385.1	Halobacteria	Halobacteriales	Halobacteria	Halobacteriales	Archaea	Euryarchaeota	Euryarchaeota	Halobacteria	Halobacteriales	Halobacteriaceae	Halovenus	Halovenus_aranensis	GCA_900100385	Halobacteriales|Euryarchaeota|Euryarchaeota|Halobacteria|Halobacteriales|Halobacteriaceae|Halovenus|Halovenus_aranensis|GCA_900100385	Halobacteriales|Euryarchaeota|Euryarchaeota|Halobacteria|Halobacteriales|Halobacteriaceae|Halovenus|Halovenus_aranensis|GCA_900100385
GCA_000334895.1	Halobacteria	Halobacteriales	Halobacteria	Halobacteriales	Archaea	Euryarchaeota	Euryarchaeota	Halobacteria	Halobacteriales	Halococcaceae	Halococcus	Halococcus_agarilyticus	GCA_000334895	Halobacteriales|Euryarchaeota|Euryarchaeota|Halobacteria|Halobacteriales|Halococcaceae|Halococcus|Halococcus_agarilyticus|GCA_000334895	Halobacteriales|Euryarchaeota|Euryarchaeota|Halobacteria|Halobacteriales|Halococcaceae|Halococcus|Halococcus_agarilyticus|GCA_000334895
GCA_000226975.3	Halobacteria	Natrialbales	Halobacteria	Natrialbales	Archaea	Euryarchaeota	Euryarchaeota	Halobacteria	Natrialbales	Natrialbaceae	Halobiforma	Halobiforma_lacisalsi	GCA_000226975	Natrialbales|Euryarchaeota|Euryarchaeota|Halobacteria|Natrialbales|Natrialbaceae|Halobiforma|Halobiforma_lacisalsi|GCA_000226975	Natrialbales|Euryarchaeota|Euryarchaeota|Halobacteria|Natrialbales|Natrialbaceae|Halobiforma|Halobiforma_lacisalsi|GCA_000226975
GCA_000217715.1	Halobacteria	Natrialbales	Halobacteria	Natrialbales	Archaea	Euryarchaeota	Euryarchaeota	Halobacteria	Natrialbales	Natrialbaceae	Halopiger	Halopiger_xanaduensis	GCA_000217715	Natrialbales|Euryarchaeota|Euryarchaeota|Halobacteria|Natrialbales|Natrialbaceae|Halopiger|Halopiger_xanaduensis|GCA_000217715	Natrialbales|Euryarchaeota|Euryarchaeota|Halobacteria|Natrialbales|Natrialbaceae|Halopiger|Halopiger_xanaduensis|GCA_000217715
GCA_000517625.1	Halobacteria	Natrialbales	Halobacteria	Natrialbales	Archaea	Euryarchaeota	Euryarchaeota	Halobacteria	Natrialbales	Natrialbaceae	Halostagnicola	Halostagnicola_larsenii	GCA_000517625	Natrialbales|Euryarchaeota|Euryarchaeota|Halobacteria|Natrialbales|Natrialbaceae|Halostagnicola|Halostagnicola_larsenii|GCA_000517625	Natrialbales|Euryarchaeota|Euryarchaeota|Halobacteria|Natrialbales|Natrialbaceae|Halostagnicola|Halostagnicola_larsenii|GCA_000517625
GCA_000025325.1	Halobacteria	Natrialbales	Halobacteria	Natrialbales	Archaea	Euryarchaeota	Euryarchaeota	Halobacteria	Natrialbales	Natrialbaceae	Haloterrigena	Haloterrigena_turkmenica	GCA_000025325	Natrialbales|Euryarchaeota|Euryarchaeota|Halobacteria|Natrialbales|Natrialbaceae|Haloterrigena|Haloterrigena_turkmenica|GCA_000025325	Natrialbales|Euryarchaeota|Euryarchaeota|Halobacteria|Natrialbales|Natrialbaceae|Haloterrigena|Haloterrigena_turkmenica|GCA_000025325
GCA_000328525.1	Halobacteria	Natrialbales	Halobacteria	Natrialbales	Archaea	Euryarchaeota	Euryarchaeota	Halobacteria	Natrialbales	Natrialbaceae	Halovivax	Halovivax_ruber	GCA_000328525	Natrialbales|Euryarchaeota|Euryarchaeota|Halobacteria|Natrialbales|Natrialbaceae|Halovivax|Halovivax_ruber|GCA_000328525	Natrialbales|Euryarchaeota|Euryarchaeota|Halobacteria|Natrialbales|Natrialbaceae|Halovivax|Halovivax_ruber|GCA_000328525
GCA_003841485.1	Halobacteria	Natrialbales	Halobacteria	Natrialbales	Archaea	Euryarchaeota	Euryarchaeota	Halobacteria	Natrialbales	Natrialbaceae	Natrarchaeobius	Natrarchaeobius_halalkaliphilus	GCA_003841485	Natrialbales|Euryarchaeota|Euryarchaeota|Halobacteria|Natrialbales|Natrialbaceae|Natrarchaeobius|Natrarchaeobius_halalkaliphilus|GCA_003841485	Natrialbales|Euryarchaeota|Euryarchaeota|Halobacteria|Natrialbales|Natrialbaceae|Natrarchaeobius|Natrarchaeobius_halalkaliphilus|GCA_003841485
GCA_000025625.1	Halobacteria	Natrialbales	Halobacteria	Natrialbales	Archaea	Euryarchaeota	Euryarchaeota	Halobacteria	Natrialbales	Natrialbaceae	Natrialba	Natrialba_magadii	GCA_000025625	Natrialbales|Euryarchaeota|Euryarchaeota|Halobacteria|Natrialbales|Natrialbaceae|Natrialba|Natrialba_magadii|GCA_000025625	Natrialbales|Euryarchaeota|Euryarchaeota|Halobacteria|Natrialbales|Natrialbaceae|Natrialba|Natrialba_magadii|GCA_000025625
GCA_000230735.3	Halobacteria	Natrialbales	Halobacteria	Natrialbales	Archaea	Euryarchaeota	Euryarchaeota	Halobacteria	Natrialbales	Natrialbaceae	Natrinema	Natrinema_pellirubrum	GCA_000230735	Natrialbales|Euryarchaeota|Euryarchaeota|Halobacteria|Natrialbales|Natrialbaceae|Natrinema|Natrinema_pellirubrum|GCA_000230735	Natrialbales|Euryarchaeota|Euryarchaeota|Halobacteria|Natrialbales|Natrialbaceae|Natrinema|Natrinema_pellirubrum|GCA_000230735
GCA_000230715.3	Halobacteria	Natrialbales	Halobacteria	Natrialbales	Archaea	Euryarchaeota	Euryarchaeota	Halobacteria	Natrialbales	Natrialbaceae	Natronobacterium	Natronobacterium_gregoryi	GCA_000230715	Natrialbales|Euryarchaeota|Euryarchaeota|Halobacteria|Natrialbales|Natrialbaceae|Natronobacterium|Natronobacterium_gregoryi|GCA_000230715	Natrialbales|Euryarchaeota|Euryarchaeota|Halobacteria|Natrialbales|Natrialbaceae|Natronobacterium|Natronobacterium_gregoryi|GCA_000230715
GCA_000328685.1	Halobacteria	Natrialbales	Halobacteria	Natrialbales	Archaea	Euryarchaeota	Euryarchaeota	Halobacteria	Natrialbales	Natrialbaceae	Natronococcus	Natronococcus_occultus	GCA_000328685	Natrialbales|Euryarchaeota|Euryarchaeota|Halobacteria|Natrialbales|Natrialbaceae|Natronococcus|Natronococcus_occultus|GCA_000328685	Natrialbales|Euryarchaeota|Euryarchaeota|Halobacteria|Natrialbales|Natrialbaceae|Natronococcus|Natronococcus_occultus|GCA_000328685
GCA_000337235.1	Halobacteria	Natrialbales	Halobacteria	Natrialbales	Archaea	Euryarchaeota	Euryarchaeota	Halobacteria	Natrialbales	Natrialbaceae	Natronorubrum	Natronorubrum_tibetense	GCA_000337235	Natrialbales|Euryarchaeota|Euryarchaeota|Halobacteria|Natrialbales|Natrialbaceae|Natronorubrum|Natronorubrum_tibetense|GCA_000337235	Natrialbales|Euryarchaeota|Euryarchaeota|Halobacteria|Natrialbales|Natrialbaceae|Natronorubrum|Natronorubrum_tibetense|GCA_000337235
GCA_000015765.1	Methanomicrobiales	Methanomicrobiales	Methanomicrobia	Methanomicrobiales	Archaea	Euryarchaeota	Euryarchaeota	Methanomicrobia	Methanomicrobiales	Methanocorpusculaceae	Methanocorpusculum	Methanocorpusculum_labreanum	GCA_000015765	Methanomicrobiales|Euryarchaeota|Euryarchaeota|Methanomicrobia|Methanomicrobiales|Methanocorpusculaceae|Methanocorpusculum|Methanocorpusculum_labreanum|GCA_000015765	Methanomicrobiales|Euryarchaeota|Euryarchaeota|Methanomicrobia|Methanomicrobiales|Methanocorpusculaceae|Methanocorpusculum|Methanocorpusculum_labreanum|GCA_000015765
GCA_001571405.1	Methanomicrobiales	Methanomicrobiales	Methanomicrobia	Methanomicrobiales	Archaea	Euryarchaeota	Euryarchaeota	Methanomicrobia	Methanomicrobiales	Methanomicrobiaceae	Methanoculleus	Methanoculleus_thermophilus	GCA_001571405	Methanomicrobiales|Euryarchaeota|Euryarchaeota|Methanomicrobia|Methanomicrobiales|Methanomicrobiaceae|Methanoculleus|Methanoculleus_thermophilus|GCA_001571405	Methanomicrobiales|Euryarchaeota|Euryarchaeota|Methanomicrobia|Methanomicrobiales|Methanomicrobiaceae|Methanoculleus|Methanoculleus_thermophilus|GCA_001571405
GCA_001571385.1	Methanomicrobiales	Methanomicrobiales	Methanomicrobia	Methanomicrobiales	Archaea	Euryarchaeota	Euryarchaeota	Methanomicrobia	Methanomicrobiales	Methanomicrobiaceae	Methanofollis	Methanofollis_ethanolicus	GCA_001571385	Methanomicrobiales|Euryarchaeota|Euryarchaeota|Methanomicrobia|Methanomicrobiales|Methanomicrobiaceae|Methanofollis|Methanofollis_ethanolicus|GCA_001571385	Methanomicrobiales|Euryarchaeota|Euryarchaeota|Methanomicrobia|Methanomicrobiales|Methanomicrobiaceae|Methanofollis|Methanofollis_ethanolicus|GCA_001571385
GCA_000235685.3	Methanomicrobiales	Methanomicrobiales	Methanomicrobia	Methanomicrobiales	Archaea	Euryarchaeota	Euryarchaeota	Methanomicrobia	Methanomicrobiales	Methanoregulaceae	Methanolinea	Methanolinea_tarda	GCA_000235685	Methanomicrobiales|Euryarchaeota|Euryarchaeota|Methanomicrobia|Methanomicrobiales|Methanoregulaceae|Methanolinea|Methanolinea_tarda|GCA_000235685	Methanomicrobiales|Euryarchaeota|Euryarchaeota|Methanomicrobia|Methanomicrobiales|Methanoregulaceae|Methanolinea|Methanolinea_tarda|GCA_000235685
GCA_000327485.1	Methanomicrobiales	Methanomicrobiales	Methanomicrobia	Methanomicrobiales	Archaea	Euryarchaeota	Euryarchaeota	Methanomicrobia	Methanomicrobiales	Methanoregulaceae	Methanoregula	Methanoregula_formicica	GCA_000327485	Methanomicrobiales|Euryarchaeota|Euryarchaeota|Methanomicrobia|Methanomicrobiales|Methanoregulaceae|Methanoregula|Methanoregula_formicica|GCA_000327485	Methanomicrobiales|Euryarchaeota|Euryarchaeota|Methanomicrobia|Methanomicrobiales|Methanoregulaceae|Methanoregula|Methanoregula_formicica|GCA_000327485
GCA_000021965.1	Methanomicrobiales	Methanomicrobiales	Methanomicrobia	Methanomicrobiales	Archaea	Euryarchaeota	Euryarchaeota	Methanomicrobia	Methanomicrobiales	Methanoregulaceae	Methanosphaerula	Methanosphaerula_palustris	GCA_000021965	Methanomicrobiales|Euryarchaeota|Euryarchaeota|Methanomicrobia|Methanomicrobiales|Methanoregulaceae|Methanosphaerula|Methanosphaerula_palustris|GCA_000021965	Methanomicrobiales|Euryarchaeota|Euryarchaeota|Methanomicrobia|Methanomicrobiales|Methanoregulaceae|Methanosphaerula|Methanosphaerula_palustris|GCA_000021965
GCA_000013445.1	Methanomicrobiales	Methanomicrobiales	Methanomicrobia	Methanomicrobiales	Archaea	Euryarchaeota	Euryarchaeota	Methanomicrobia	Methanomicrobiales	Methanospirillaceae	Methanospirillum	Methanospirillum_hungatei	GCA_000013445	Methanomicrobiales|Euryarchaeota|Euryarchaeota|Methanomicrobia|Methanomicrobiales|Methanospirillaceae|Methanospirillum|Methanospirillum_hungatei|GCA_000013445	Methanomicrobiales|Euryarchaeota|Euryarchaeota|Methanomicrobia|Methanomicrobiales|Methanospirillaceae|Methanospirillum|Methanospirillum_hungatei|GCA_000013445
GCA_000685155.1	Methanosarcinales	Methanosarcinales	Methanomicrobia	Methanosarcinales	Archaea	Euryarchaeota	Euryarchaeota	Methanomicrobia	Methanosarcinales	Methanoperedenaceae	Candidatus_Methanoperedens	Candidatus_Methanoperedens_nitroreducens	GCA_000685155	Methanosarcinales|Euryarchaeota|Euryarchaeota|Methanomicrobia|Methanosarcinales|Methanoperedenaceae|Candidatus_Methanoperedens|Candidatus_Methanoperedens_nitroreducens|GCA_000685155	Methanosarcinales|Euryarchaeota|Euryarchaeota|Methanomicrobia|Methanosarcinales|Methanoperedenaceae|Candidatus_Methanoperedens|Candidatus_Methanoperedens_nitroreducens|GCA_000685155
GCA_003104905.1	Methanosarcinales	Methanosarcinales	Methanomicrobia	Methanosarcinales	Archaea	Euryarchaeota	Euryarchaeota	Methanomicrobia	Methanosarcinales	Methanoperedenaceae	none	Candidatus_Methanoperedenaceae_archaeon	GCA_003104905	Methanosarcinales|Euryarchaeota|Euryarchaeota|Methanomicrobia|Methanosarcinales|Methanoperedenaceae|none|Candidatus_Methanoperedenaceae_archaeon|GCA_003104905	Methanosarcinales|Euryarchaeota|Euryarchaeota|Methanomicrobia|Methanosarcinales|Methanoperedenaceae|none|Candidatus_Methanoperedenaceae_archaeon|GCA_003104905
GCA_004363215.1	Methanosarcinales	Methanosarcinales	Methanomicrobia	Methanosarcinales	Archaea	Euryarchaeota	Euryarchaeota	Methanomicrobia	Methanosarcinales	Methanosarcinaceae	Methanimicrococcus	Methanimicrococcus_blatticola	GCA_004363215	Methanosarcinales|Euryarchaeota|Euryarchaeota|Methanomicrobia|Methanosarcinales|Methanosarcinaceae|Methanimicrococcus|Methanimicrococcus_blatticola|GCA_004363215	Methanosarcinales|Euryarchaeota|Euryarchaeota|Methanomicrobia|Methanosarcinales|Methanosarcinaceae|Methanimicrococcus|Methanimicrococcus_blatticola|GCA_004363215
GCA_000013725.1	Methanosarcinales	Methanosarcinales	Methanomicrobia	Methanosarcinales	Archaea	Euryarchaeota	Euryarchaeota	Methanomicrobia	Methanosarcinales	Methanosarcinaceae	Methanococcoides	Methanococcoides_burtonii	GCA_000013725	Methanosarcinales|Euryarchaeota|Euryarchaeota|Methanomicrobia|Methanosarcinales|Methanosarcinaceae|Methanococcoides|Methanococcoides_burtonii|GCA_000013725	Methanosarcinales|Euryarchaeota|Euryarchaeota|Methanomicrobia|Methanosarcinales|Methanosarcinaceae|Methanococcoides|Methanococcoides_burtonii|GCA_000013725
GCA_000196655.1	Methanosarcinales	Methanosarcinales	Methanomicrobia	Methanosarcinales	Archaea	Euryarchaeota	Euryarchaeota	Methanomicrobia	Methanosarcinales	Methanosarcinaceae	Methanohalobium	Methanohalobium_evestigatum	GCA_000196655	Methanosarcinales|Euryarchaeota|Euryarchaeota|Methanomicrobia|Methanosarcinales|Methanosarcinaceae|Methanohalobium|Methanohalobium_evestigatum|GCA_000196655	Methanosarcinales|Euryarchaeota|Euryarchaeota|Methanomicrobia|Methanosarcinales|Methanosarcinaceae|Methanohalobium|Methanohalobium_evestigatum|GCA_000196655
GCA_001889405.1	Methanosarcinales	Methanosarcinales	Methanomicrobia	Methanosarcinales	Archaea	Euryarchaeota	Euryarchaeota	Methanomicrobia	Methanosarcinales	Methanosarcinaceae	Methanohalophilus	Methanohalophilus_halophilus	GCA_001889405	Methanosarcinales|Euryarchaeota|Euryarchaeota|Methanomicrobia|Methanosarcinales|Methanosarcinaceae|Methanohalophilus|Methanohalophilus_halophilus|GCA_001889405	Methanosarcinales|Euryarchaeota|Euryarchaeota|Methanomicrobia|Methanosarcinales|Methanosarcinaceae|Methanohalophilus|Methanohalophilus_halophilus|GCA_001889405
GCA_000306725.1	Methanosarcinales	Methanosarcinales	Methanomicrobia	Methanosarcinales	Archaea	Euryarchaeota	Euryarchaeota	Methanomicrobia	Methanosarcinales	Methanosarcinaceae	Methanolobus	Methanolobus_psychrophilus	GCA_000306725	Methanosarcinales|Euryarchaeota|Euryarchaeota|Methanomicrobia|Methanosarcinales|Methanosarcinaceae|Methanolobus|Methanolobus_psychrophilus|GCA_000306725	Methanosarcinales|Euryarchaeota|Euryarchaeota|Methanomicrobia|Methanosarcinales|Methanosarcinaceae|Methanolobus|Methanolobus_psychrophilus|GCA_000306725
GCA_000328665.1	Methanosarcinales	Methanosarcinales	Methanomicrobia	Methanosarcinales	Archaea	Euryarchaeota	Euryarchaeota	Methanomicrobia	Methanosarcinales	Methanosarcinaceae	Methanomethylovorans	Methanomethylovorans_hollandica	GCA_000328665	Methanosarcinales|Euryarchaeota|Euryarchaeota|Methanomicrobia|Methanosarcinales|Methanosarcinaceae|Methanomethylovorans|Methanomethylovorans_hollandica|GCA_000328665	Methanosarcinales|Euryarchaeota|Euryarchaeota|Methanomicrobia|Methanosarcinales|Methanosarcinaceae|Methanomethylovorans|Methanomethylovorans_hollandica|GCA_000328665
GCA_000217995.1	Methanosarcinales	Methanosarcinales	Methanomicrobia	Methanosarcinales	Archaea	Euryarchaeota	Euryarchaeota	Methanomicrobia	Methanosarcinales	Methanosarcinaceae	Methanosalsum	Methanosalsum_zhilinae	GCA_000217995	Methanosarcinales|Euryarchaeota|Euryarchaeota|Methanomicrobia|Methanosarcinales|Methanosarcinaceae|Methanosalsum|Methanosalsum_zhilinae|GCA_000217995	Methanosarcinales|Euryarchaeota|Euryarchaeota|Methanomicrobia|Methanosarcinales|Methanosarcinaceae|Methanosalsum|Methanosalsum_zhilinae|GCA_000217995
GCA_000007345.1	Methanosarcinales	Methanosarcinales	Methanomicrobia	Methanosarcinales	Archaea	Euryarchaeota	Euryarchaeota	Methanomicrobia	Methanosarcinales	Methanosarcinaceae	Methanosarcina	Methanosarcina_acetivorans	GCA_000007345	Methanosarcinales|Euryarchaeota|Euryarchaeota|Methanomicrobia|Methanosarcinales|Methanosarcinaceae|Methanosarcina|Methanosarcina_acetivorans|GCA_000007345	Methanosarcinales|Euryarchaeota|Euryarchaeota|Methanomicrobia|Methanosarcinales|Methanosarcinaceae|Methanosarcina|Methanosarcina_acetivorans|GCA_000007345
GCA_000970025.1	Methanosarcinales	Methanosarcinales	Methanomicrobia	Methanosarcinales	Archaea	Euryarchaeota	Euryarchaeota	Methanomicrobia	Methanosarcinales	Methanosarcinaceae	Methanosarcina	Methanosarcina_barkeri	GCA_000970025	Methanosarcinales|Euryarchaeota|Euryarchaeota|Methanomicrobia|Methanosarcinales|Methanosarcinaceae|Methanosarcina|Methanosarcina_barkeri|GCA_000970025	Methanosarcinales|Euryarchaeota|Euryarchaeota|Methanomicrobia|Methanosarcinales|Methanosarcinaceae|Methanosarcina|Methanosarcina_barkeri|GCA_000970025
GCA_000970205.1	Methanosarcinales	Methanosarcinales	Methanomicrobia	Methanosarcinales	Archaea	Euryarchaeota	Euryarchaeota	Methanomicrobia	Methanosarcinales	Methanosarcinaceae	Methanosarcina	Methanosarcina_mazei	GCA_000970205	Methanosarcinales|Euryarchaeota|Euryarchaeota|Methanomicrobia|Methanosarcinales|Methanosarcinaceae|Methanosarcina|Methanosarcina_mazei|GCA_000970205	Methanosarcinales|Euryarchaeota|Euryarchaeota|Methanomicrobia|Methanosarcinales|Methanosarcinaceae|Methanosarcina|Methanosarcina_mazei|GCA_000970205
GCA_001509375.1	Methanosarcinales	Methanosarcinales	Methanomicrobia	Methanosarcinales	Archaea	Euryarchaeota	Euryarchaeota	Methanomicrobia	Methanosarcinales	Methanotrichaceae	Methanothrix	Methanosaeta_harundinacea	GCA_001509375	Methanosarcinales|Euryarchaeota|Euryarchaeota|Methanomicrobia|Methanosarcinales|Methanotrichaceae|Methanothrix|Methanosaeta_harundinacea|GCA_001509375	Methanosarcinales|Euryarchaeota|Euryarchaeota|Methanomicrobia|Methanosarcinales|Methanotrichaceae|Methanothrix|Methanosaeta_harundinacea|GCA_001509375
GCA_000204415.1	Methanosarcinales	Methanosarcinales	Methanomicrobia	Methanosarcinales	Archaea	Euryarchaeota	Euryarchaeota	Methanomicrobia	Methanosarcinales	Methanotrichaceae	Methanothrix	Methanothrix_soehngenii	GCA_000204415	Methanosarcinales|Euryarchaeota|Euryarchaeota|Methanomicrobia|Methanosarcinales|Methanotrichaceae|Methanothrix|Methanothrix_soehngenii|GCA_000204415	Methanosarcinales|Euryarchaeota|Euryarchaeota|Methanomicrobia|Methanosarcinales|Methanotrichaceae|Methanothrix|Methanothrix_soehngenii|GCA_000204415
GCA_000711905.1	Methanosarcinales	Methanosarcinales	Methanomicrobia	Methanosarcinales	Archaea	Euryarchaeota	Euryarchaeota	Methanomicrobia	Methanosarcinales	Methermicoccaceae	Methermicoccus	Methermicoccus_shengliensis	GCA_000711905	Methanosarcinales|Euryarchaeota|Euryarchaeota|Methanomicrobia|Methanosarcinales|Methermicoccaceae|Methermicoccus|Methermicoccus_shengliensis|GCA_000711905	Methanosarcinales|Euryarchaeota|Euryarchaeota|Methanomicrobia|Methanosarcinales|Methermicoccaceae|Methermicoccus|Methermicoccus_shengliensis|GCA_000711905
GCA_000063445.1	Methanocellales	Methanocellales	Methanomicrobia	Methanocellales	Archaea	Euryarchaeota	Euryarchaeota	Methanomicrobia	Methanocellales	Methanocellaceae	Methanocella	Methanocella_arvoryzae	GCA_000063445	Methanocellales|Euryarchaeota|Euryarchaeota|Methanomicrobia|Methanocellales|Methanocellaceae|Methanocella|Methanocella_arvoryzae|GCA_000063445	Methanocellales|Euryarchaeota|Euryarchaeota|Methanomicrobia|Methanocellales|Methanocellaceae|Methanocella|Methanocella_arvoryzae|GCA_000063445
GCA_003132625.1	Methanocellales2	Methanocellales2	Methanomicrobia	Methanocellales2	Archaea	Euryarchaeota	Euryarchaeota	Methanomicrobia	Methanocellales2	none	none	Euryarchaeota_archaeon	GCA_003132625	Methanocellales2|Euryarchaeota|Euryarchaeota|Methanomicrobia|Methanocellales2|none|none|Euryarchaeota_archaeon|GCA_003132625	Methanocellales2|Euryarchaeota|Euryarchaeota|Methanomicrobia|Methanocellales2|none|none|Euryarchaeota_archaeon|GCA_003132625
GCA_003141075.1	Methanocellales2	Methanocellales2	Methanomicrobia	Methanocellales2	Archaea	Euryarchaeota	Euryarchaeota	Methanomicrobia	Methanocellales2	none	none	Euryarchaeota_archaeon	GCA_003141075	Methanocellales2|Euryarchaeota|Euryarchaeota|Methanomicrobia|Methanocellales2|none|none|Euryarchaeota_archaeon|GCA_003141075	Methanocellales2|Euryarchaeota|Euryarchaeota|Methanomicrobia|Methanocellales2|none|none|Euryarchaeota_archaeon|GCA_003141075
GCA_003170935.1	Methanocellales2	Methanocellales2	Methanomicrobia	Methanocellales2	Archaea	Euryarchaeota	Euryarchaeota	Methanomicrobia	Methanocellales2	none	none	Euryarchaeota_archaeon	GCA_003170935	Methanocellales2|Euryarchaeota|Euryarchaeota|Methanomicrobia|Methanocellales2|none|none|Euryarchaeota_archaeon|GCA_003170935	Methanocellales2|Euryarchaeota|Euryarchaeota|Methanomicrobia|Methanocellales2|none|none|Euryarchaeota_archaeon|GCA_003170935
GCA_001766825.1	Syntrophoarchaeales	Syntrophoarchaeales	Methanomicrobia	Syntrophoarchaeales	Archaea	Euryarchaeota	Euryarchaeota	Methanomicrobia	Methanosarcinales	none	Candidatus_Syntrophoarchaeum	Candidatus_Syntrophoarchaeum_butanivorans	GCA_001766825	Syntrophoarchaeales|Euryarchaeota|Euryarchaeota|Methanomicrobia|Methanosarcinales|none|Candidatus_Syntrophoarchaeum|Candidatus_Syntrophoarchaeum_butanivorans|GCA_001766825	Syntrophoarchaeales|Euryarchaeota|Euryarchaeota|Methanomicrobia|Methanosarcinales|none|Candidatus_Syntrophoarchaeum|Candidatus_Syntrophoarchaeum_butanivorans|GCA_001766825
GCA_001766815.1	Syntrophoarchaeales	Syntrophoarchaeales	Methanomicrobia	Syntrophoarchaeales	Archaea	Euryarchaeota	Euryarchaeota	Methanomicrobia	Methanosarcinales	none	Candidatus_Syntrophoarchaeum	Candidatus_Syntrophoarchaeum_caldarius	GCA_001766815	Syntrophoarchaeales|Euryarchaeota|Euryarchaeota|Methanomicrobia|Methanosarcinales|none|Candidatus_Syntrophoarchaeum|Candidatus_Syntrophoarchaeum_caldarius|GCA_001766815	Syntrophoarchaeales|Euryarchaeota|Euryarchaeota|Methanomicrobia|Methanosarcinales|none|Candidatus_Syntrophoarchaeum|Candidatus_Syntrophoarchaeum_caldarius|GCA_001766815
GCA_000008665.1	Archaeoglobales	Archaeoglobales	Archaeoglobi	Archaeoglobales	Archaea	Euryarchaeota	Euryarchaeota	Archaeoglobi	Archaeoglobales	Archaeoglobaceae	Archaeoglobus	Archaeoglobus_fulgidus	GCA_000008665	Archaeoglobales|Euryarchaeota|Euryarchaeota|Archaeoglobi|Archaeoglobales|Archaeoglobaceae|Archaeoglobus|Archaeoglobus_fulgidus|GCA_000008665	Archaeoglobales|Euryarchaeota|Euryarchaeota|Archaeoglobi|Archaeoglobales|Archaeoglobaceae|Archaeoglobus|Archaeoglobus_fulgidus|GCA_000008665
GCA_000025285.1	Archaeoglobales	Archaeoglobales	Archaeoglobi	Archaeoglobales	Archaea	Euryarchaeota	Euryarchaeota	Archaeoglobi	Archaeoglobales	Archaeoglobaceae	Archaeoglobus	Archaeoglobus_profundus	GCA_000025285	Archaeoglobales|Euryarchaeota|Euryarchaeota|Archaeoglobi|Archaeoglobales|Archaeoglobaceae|Archaeoglobus|Archaeoglobus_profundus|GCA_000025285	Archaeoglobales|Euryarchaeota|Euryarchaeota|Archaeoglobi|Archaeoglobales|Archaeoglobaceae|Archaeoglobus|Archaeoglobus_profundus|GCA_000025285
GCA_000385565.1	Archaeoglobales	Archaeoglobales	Archaeoglobi	Archaeoglobales	Archaea	Euryarchaeota	Euryarchaeota	Archaeoglobi	Archaeoglobales	Archaeoglobaceae	Archaeoglobus	Archaeoglobus_sulfaticallidus	GCA_000385565	Archaeoglobales|Euryarchaeota|Euryarchaeota|Archaeoglobi|Archaeoglobales|Archaeoglobaceae|Archaeoglobus|Archaeoglobus_sulfaticallidus|GCA_000385565	Archaeoglobales|Euryarchaeota|Euryarchaeota|Archaeoglobi|Archaeoglobales|Archaeoglobaceae|Archaeoglobus|Archaeoglobus_sulfaticallidus|GCA_000385565
GCA_000194625.1	Archaeoglobales	Archaeoglobales	Archaeoglobi	Archaeoglobales	Archaea	Euryarchaeota	Euryarchaeota	Archaeoglobi	Archaeoglobales	Archaeoglobaceae	Archaeoglobus	Archaeoglobus_veneficus	GCA_000194625	Archaeoglobales|Euryarchaeota|Euryarchaeota|Archaeoglobi|Archaeoglobales|Archaeoglobaceae|Archaeoglobus|Archaeoglobus_veneficus|GCA_000194625	Archaeoglobales|Euryarchaeota|Euryarchaeota|Archaeoglobi|Archaeoglobales|Archaeoglobaceae|Archaeoglobus|Archaeoglobus_veneficus|GCA_000194625
GCA_000025505.1	Archaeoglobales	Archaeoglobales	Archaeoglobi	Archaeoglobales	Archaea	Euryarchaeota	Euryarchaeota	Archaeoglobi	Archaeoglobales	Archaeoglobaceae	Ferroglobus	Ferroglobus_placidus	GCA_000025505	Archaeoglobales|Euryarchaeota|Euryarchaeota|Archaeoglobi|Archaeoglobales|Archaeoglobaceae|Ferroglobus|Ferroglobus_placidus|GCA_000025505	Archaeoglobales|Euryarchaeota|Euryarchaeota|Archaeoglobi|Archaeoglobales|Archaeoglobaceae|Ferroglobus|Ferroglobus_placidus|GCA_000025505
GCA_000789255.1	Archaeoglobales	Archaeoglobales	Archaeoglobi	Archaeoglobales	Archaea	Euryarchaeota	Euryarchaeota	Archaeoglobi	Archaeoglobales	Archaeoglobaceae	Geoglobus	Geoglobus_acetivorans	GCA_000789255	Archaeoglobales|Euryarchaeota|Euryarchaeota|Archaeoglobi|Archaeoglobales|Archaeoglobaceae|Geoglobus|Geoglobus_acetivorans|GCA_000789255	Archaeoglobales|Euryarchaeota|Euryarchaeota|Archaeoglobi|Archaeoglobales|Archaeoglobaceae|Geoglobus|Geoglobus_acetivorans|GCA_000789255
GCA_004212075.1	Methanoliparales	Methanoliparales	Methanoliparia	Methanoliparales	Archaea	Euryarchaeota	Euryarchaeota	Methanoliparia	Methanoliparales	Methanoliparaceae	Candidatus_Methanoliparum	Candidatus_Methanoliparum_thermophilum	GCA_004212075	Methanoliparales|Euryarchaeota|Euryarchaeota|Methanoliparia|Methanoliparales|Methanoliparaceae|Candidatus_Methanoliparum|Candidatus_Methanoliparum_thermophilum|GCA_004212075	Methanoliparales|Euryarchaeota|Euryarchaeota|Methanoliparia|Methanoliparales|Methanoliparaceae|Candidatus_Methanoliparum|Candidatus_Methanoliparum_thermophilum|GCA_004212075
GCA_004212085.1	Methanoliparales	Methanoliparales	Methanoliparia	Methanoliparales	Archaea	Euryarchaeota	Euryarchaeota	Methanoliparia	Methanoliparales	Methanollivieraceae	Candidatus_Methanolliviera	Candidatus_Methanolliviera_hydrocarbonicum	GCA_004212085	Methanoliparales|Euryarchaeota|Euryarchaeota|Methanoliparia|Methanoliparales|Methanollivieraceae|Candidatus_Methanolliviera|Candidatus_Methanolliviera_hydrocarbonicum|GCA_004212085	Methanoliparales|Euryarchaeota|Euryarchaeota|Methanoliparia|Methanoliparales|Methanollivieraceae|Candidatus_Methanolliviera|Candidatus_Methanolliviera_hydrocarbonicum|GCA_004212085
GCA_001914405.1	Methanonatronarchaeales	Methanonatronarchaeia	Methanonatronarchaeia	Methanonatronarchaeia	Archaea	Euryarchaeota	Euryarchaeota	Methanonatronarchaeia	Methanonatronarchaeales	Methanonatronarchaeaceae	Candidatus_Methanohalarchaeum	Candidatus_Methanohalarchaeum_thermophilum	GCA_001914405	Methanonatronarchaeia|Euryarchaeota|Euryarchaeota|Methanonatronarchaeia|Methanonatronarchaeales|Methanonatronarchaeaceae|Candidatus_Methanohalarchaeum|Candidatus_Methanohalarchaeum_thermophilum|GCA_001914405	Methanonatronarchaeia|Euryarchaeota|Euryarchaeota|Methanonatronarchaeia|Methanonatronarchaeales|Methanonatronarchaeaceae|Candidatus_Methanohalarchaeum|Candidatus_Methanohalarchaeum_thermophilum|GCA_001914405
GCA_002153915.1	Methanonatronarchaeales	Methanonatronarchaeia	Methanonatronarchaeia	Methanonatronarchaeia	Archaea	Euryarchaeota	Euryarchaeota	Methanonatronarchaeia	Methanonatronarchaeales	Methanonatronarchaeaceae	Methanonatronarchaeum	Methanonatronarchaeum_thermophilum	GCA_002153915	Methanonatronarchaeia|Euryarchaeota|Euryarchaeota|Methanonatronarchaeia|Methanonatronarchaeales|Methanonatronarchaeaceae|Methanonatronarchaeum|Methanonatronarchaeum_thermophilum|GCA_002153915	Methanonatronarchaeia|Euryarchaeota|Euryarchaeota|Methanonatronarchaeia|Methanonatronarchaeales|Methanonatronarchaeaceae|Methanonatronarchaeum|Methanonatronarchaeum_thermophilum|GCA_002153915
GCA_003193925.1	Poseidoniales	Poseidoniales	Poseidoniia	Poseidoniales	Archaea	Euryarchaeota	Euryarchaeota	Poseidoniia	Poseidoniales	Candidatus_Thalassarchaeaceae	none	Candidatus_Thalassarchaeum_betae_Cayman_51_deep	GCA_003193925	Poseidoniales|Euryarchaeota|Euryarchaeota|Poseidoniia|Poseidoniales|Candidatus_Thalassarchaeaceae|none|Candidatus_Thalassarchaeum_betae_Cayman_51_deep|GCA_003193925	Poseidoniales|Euryarchaeota|Euryarchaeota|Poseidoniia|Poseidoniales|Candidatus_Thalassarchaeaceae|none|Candidatus_Thalassarchaeum_betae_Cayman_51_deep|GCA_003193925
GCA_003324635.1	Poseidoniales	Poseidoniales	Poseidoniia	Poseidoniales	Archaea	Euryarchaeota	Euryarchaeota	Poseidoniia	Poseidoniales	none	none	Candidatus_Poseidoniales_archaeon	GCA_003324635	Poseidoniales|Euryarchaeota|Euryarchaeota|Poseidoniia|Poseidoniales|none|none|Candidatus_Poseidoniales_archaeon|GCA_003324635	Poseidoniales|Euryarchaeota|Euryarchaeota|Poseidoniia|Poseidoniales|none|none|Candidatus_Poseidoniales_archaeon|GCA_003324635
GCA_003602595.1	Poseidoniales	Poseidoniales	Poseidoniia	Poseidoniales	Archaea	Euryarchaeota	Euryarchaeota	Poseidoniia	Poseidoniales	none	none	Candidatus_Poseidoniales_archaeon	GCA_003602595	Poseidoniales|Euryarchaeota|Euryarchaeota|Poseidoniia|Poseidoniales|none|none|Candidatus_Poseidoniales_archaeon|GCA_003602595	Poseidoniales|Euryarchaeota|Euryarchaeota|Poseidoniia|Poseidoniales|none|none|Candidatus_Poseidoniales_archaeon|GCA_003602595
GCA_002502415.1	Poseidoniales	Poseidoniales	Poseidoniia	Poseidoniales	Archaea	Euryarchaeota	Euryarchaeota	Poseidoniia	Poseidoniales	none	none	Euryarchaeota_archaeon_UBA131	GCA_002502415	Poseidoniales|Euryarchaeota|Euryarchaeota|Poseidoniia|Poseidoniales|none|none|Euryarchaeota_archaeon_UBA131|GCA_002502415	Poseidoniales|Euryarchaeota|Euryarchaeota|Poseidoniia|Poseidoniales|none|none|Euryarchaeota_archaeon_UBA131|GCA_002502415
GCA_002504435.1	Poseidoniales	Poseidoniales	Poseidoniia	Poseidoniales	Archaea	Euryarchaeota	Euryarchaeota	Poseidoniia	Poseidoniales	none	none	Euryarchaeota_archaeon_UBA438	GCA_002504435	Poseidoniales|Euryarchaeota|Euryarchaeota|Poseidoniia|Poseidoniales|none|none|Euryarchaeota_archaeon_UBA438|GCA_002504435	Poseidoniales|Euryarchaeota|Euryarchaeota|Poseidoniia|Poseidoniales|none|none|Euryarchaeota_archaeon_UBA438|GCA_002504435
GCA_002507425.1	Poseidoniales	Poseidoniales	Poseidoniia	Poseidoniales	Archaea	Euryarchaeota	Euryarchaeota	Poseidoniia	Poseidoniales	none	none	Euryarchaeota_archaeon_UBA53	GCA_002507425	Poseidoniales|Euryarchaeota|Euryarchaeota|Poseidoniia|Poseidoniales|none|none|Euryarchaeota_archaeon_UBA53|GCA_002507425	Poseidoniales|Euryarchaeota|Euryarchaeota|Poseidoniia|Poseidoniales|none|none|Euryarchaeota_archaeon_UBA53|GCA_002507425
GCA_002494605.1	Poseidoniales	Poseidoniales	Poseidoniia	Poseidoniales	Archaea	Euryarchaeota	Euryarchaeota	Poseidoniia	Poseidoniales	none	none	Euryarchaeota_archaeon_UBA553	GCA_002494605	Poseidoniales|Euryarchaeota|Euryarchaeota|Poseidoniia|Poseidoniales|none|none|Euryarchaeota_archaeon_UBA553|GCA_002494605	Poseidoniales|Euryarchaeota|Euryarchaeota|Poseidoniia|Poseidoniales|none|none|Euryarchaeota_archaeon_UBA553|GCA_002494605
GCA_002497405.1	Poseidoniales	Poseidoniales	Poseidoniia	Poseidoniales	Archaea	Euryarchaeota	Euryarchaeota	Poseidoniia	Poseidoniales	none	none	Euryarchaeota_archaeon_UBA63	GCA_002497405	Poseidoniales|Euryarchaeota|Euryarchaeota|Poseidoniia|Poseidoniales|none|none|Euryarchaeota_archaeon_UBA63|GCA_002497405	Poseidoniales|Euryarchaeota|Euryarchaeota|Poseidoniia|Poseidoniales|none|none|Euryarchaeota_archaeon_UBA63|GCA_002497405
GCA_002457155.1	Poseidoniales	Poseidoniales	Poseidoniia	Poseidoniales	Archaea	Euryarchaeota	Euryarchaeota	Poseidoniia	Poseidoniales	none	none	Marine_Group_II_euryarchaeote_MED-G35	GCA_002457155	Poseidoniales|Euryarchaeota|Euryarchaeota|Poseidoniia|Poseidoniales|none|none|Marine_Group_II_euryarchaeote_MED-G35|GCA_002457155	Poseidoniales|Euryarchaeota|Euryarchaeota|Poseidoniia|Poseidoniales|none|none|Marine_Group_II_euryarchaeote_MED-G35|GCA_002457155
GCA_002457595.1	Poseidoniales	Poseidoniales	Poseidoniia	Poseidoniales	Archaea	Euryarchaeota	Euryarchaeota	Poseidoniia	Poseidoniales	none	none	Marine_Group_II_euryarchaeote_MED-G36	GCA_002457595	Poseidoniales|Euryarchaeota|Euryarchaeota|Poseidoniia|Poseidoniales|none|none|Marine_Group_II_euryarchaeote_MED-G36|GCA_002457595	Poseidoniales|Euryarchaeota|Euryarchaeota|Poseidoniia|Poseidoniales|none|none|Marine_Group_II_euryarchaeote_MED-G36|GCA_002457595
GCA_002457555.1	Poseidoniales	Poseidoniales	Poseidoniia	Poseidoniales	Archaea	Euryarchaeota	Euryarchaeota	Poseidoniia	Poseidoniales	none	none	Marine_Group_II_euryarchaeote_MED-G37	GCA_002457555	Poseidoniales|Euryarchaeota|Euryarchaeota|Poseidoniia|Poseidoniales|none|none|Marine_Group_II_euryarchaeote_MED-G37|GCA_002457555	Poseidoniales|Euryarchaeota|Euryarchaeota|Poseidoniia|Poseidoniales|none|none|Marine_Group_II_euryarchaeote_MED-G37|GCA_002457555
GCA_001629205.1	Poseidoniales	Poseidoniales	Poseidoniia	Poseidoniales	Archaea	Euryarchaeota	Euryarchaeota	Poseidoniia	Poseidoniales	none	none	Marine_group_II_euryarchaeote_REDSEA-S30_B12	GCA_001629205	Poseidoniales|Euryarchaeota|Euryarchaeota|Poseidoniia|Poseidoniales|none|none|Marine_group_II_euryarchaeote_REDSEA-S30_B12|GCA_001629205	Poseidoniales|Euryarchaeota|Euryarchaeota|Poseidoniia|Poseidoniales|none|none|Marine_group_II_euryarchaeote_REDSEA-S30_B12|GCA_001629205
GCA_000246735.1	Poseidoniales	Poseidoniales	Poseidoniia	Poseidoniales	Archaea	Euryarchaeota	Euryarchaeota	Poseidoniia	Poseidoniales	none	none	uncultured_Candidatus_Poseidoniales_archaeon	GCA_000246735	Poseidoniales|Euryarchaeota|Euryarchaeota|Poseidoniia|Poseidoniales|none|none|uncultured_Candidatus_Poseidoniales_archaeon|GCA_000246735	Poseidoniales|Euryarchaeota|Euryarchaeota|Poseidoniia|Poseidoniales|none|none|uncultured_Candidatus_Poseidoniales_archaeon|GCA_000246735
GCA_004195655.1	Pontarchaeales	Pontarchaeales	Poseidoniia	Pontarchaeales	Archaea	Euryarchaeota	Euryarchaeota	Poseidoniia	Pontarchaeales	none	none	Euryarchaeota_archaeon	GCA_004195655	Pontarchaeales|Euryarchaeota|Euryarchaeota|Poseidoniia|Pontarchaeales|none|none|Euryarchaeota_archaeon|GCA_004195655	Pontarchaeales|Euryarchaeota|Euryarchaeota|Poseidoniia|Pontarchaeales|none|none|Euryarchaeota_archaeon|GCA_004195655
GCA_002506485.1	Pontarchaeales	Pontarchaeales	Poseidoniia	Pontarchaeales	Archaea	Euryarchaeota	Euryarchaeota	Poseidoniia	Pontarchaeales	none	none	Euryarchaeota_archaeon_UBA136	GCA_002506485	Pontarchaeales|Euryarchaeota|Euryarchaeota|Poseidoniia|Pontarchaeales|none|none|Euryarchaeota_archaeon_UBA136|GCA_002506485	Pontarchaeales|Euryarchaeota|Euryarchaeota|Poseidoniia|Pontarchaeales|none|none|Euryarchaeota_archaeon_UBA136|GCA_002506485
GCA_002509165.1	Pontarchaeales	Pontarchaeales	Poseidoniia	Pontarchaeales	Archaea	Euryarchaeota	Euryarchaeota	Poseidoniia	Pontarchaeales	none	none	Euryarchaeota_archaeon_UBA488	GCA_002509165	Pontarchaeales|Euryarchaeota|Euryarchaeota|Poseidoniia|Pontarchaeales|none|none|Euryarchaeota_archaeon_UBA488|GCA_002509165	Pontarchaeales|Euryarchaeota|Euryarchaeota|Poseidoniia|Pontarchaeales|none|none|Euryarchaeota_archaeon_UBA488|GCA_002509165
GCA_001875355.1	Pontarchaeales	Pontarchaeales	Poseidoniia	Pontarchaeales	Archaea	Euryarchaeota	Euryarchaeota	Poseidoniia	Pontarchaeales	none	none	Marine_Group_III_euryarchaeote_CG-Epi3	GCA_001875355	Pontarchaeales|Euryarchaeota|Euryarchaeota|Poseidoniia|Pontarchaeales|none|none|Marine_Group_III_euryarchaeote_CG-Epi3|GCA_001875355	Pontarchaeales|Euryarchaeota|Euryarchaeota|Poseidoniia|Pontarchaeales|none|none|Marine_Group_III_euryarchaeote_CG-Epi3|GCA_001875355
GCA_000800805.1	Methanomassiliicoccales	Methanomassiliicoccales	Thermoplasmata	Methanomassiliicoccales	Archaea	Euryarchaeota	Euryarchaeota	Thermoplasmata	Methanomassiliicoccales	Methanomassiliicoccaceae	Candidatus_Methanoplasma	Candidatus_Methanoplasma_termitum	GCA_000800805	Methanomassiliicoccales|Euryarchaeota|Euryarchaeota|Thermoplasmata|Methanomassiliicoccales|Methanomassiliicoccaceae|Candidatus_Methanoplasma|Candidatus_Methanoplasma_termitum|GCA_000800805	Methanomassiliicoccales|Euryarchaeota|Euryarchaeota|Thermoplasmata|Methanomassiliicoccales|Methanomassiliicoccaceae|Candidatus_Methanoplasma|Candidatus_Methanoplasma_termitum|GCA_000800805
GCA_000404225.1	Methanomassiliicoccales	Methanomassiliicoccales	Thermoplasmata	Methanomassiliicoccales	Archaea	Euryarchaeota	Euryarchaeota	Thermoplasmata	Methanomassiliicoccales	Methanomassiliicoccaceae	Methanomassiliicoccus	Candidatus_Methanomassiliicoccus_intestinalis	GCA_000404225	Methanomassiliicoccales|Euryarchaeota|Euryarchaeota|Thermoplasmata|Methanomassiliicoccales|Methanomassiliicoccaceae|Methanomassiliicoccus|Candidatus_Methanomassiliicoccus_intestinalis|GCA_000404225	Methanomassiliicoccales|Euryarchaeota|Euryarchaeota|Thermoplasmata|Methanomassiliicoccales|Methanomassiliicoccaceae|Methanomassiliicoccus|Candidatus_Methanomassiliicoccus_intestinalis|GCA_000404225
GCA_000308215.1	Methanomassiliicoccales	Methanomassiliicoccales	Thermoplasmata	Methanomassiliicoccales	Archaea	Euryarchaeota	Euryarchaeota	Thermoplasmata	Methanomassiliicoccales	Methanomassiliicoccaceae	Methanomassiliicoccus	Methanomassiliicoccus_luminyensis	GCA_000308215	Methanomassiliicoccales|Euryarchaeota|Euryarchaeota|Thermoplasmata|Methanomassiliicoccales|Methanomassiliicoccaceae|Methanomassiliicoccus|Methanomassiliicoccus_luminyensis|GCA_000308215	Methanomassiliicoccales|Euryarchaeota|Euryarchaeota|Thermoplasmata|Methanomassiliicoccales|Methanomassiliicoccaceae|Methanomassiliicoccus|Methanomassiliicoccus_luminyensis|GCA_000308215
GCA_004525545.1	Methanomassiliicoccales	Methanomassiliicoccales	Thermoplasmata	Methanomassiliicoccales	Archaea	Euryarchaeota	Euryarchaeota	Thermoplasmata	Methanomassiliicoccales	Methanomassiliicoccaceae	Methanomassiliicoccus	Methanomassiliicoccus_sp_	GCA_004525545	Methanomassiliicoccales|Euryarchaeota|Euryarchaeota|Thermoplasmata|Methanomassiliicoccales|Methanomassiliicoccaceae|Methanomassiliicoccus|Methanomassiliicoccus_sp_|GCA_004525545	Methanomassiliicoccales|Euryarchaeota|Euryarchaeota|Thermoplasmata|Methanomassiliicoccales|Methanomassiliicoccaceae|Methanomassiliicoccus|Methanomassiliicoccus_sp_|GCA_004525545
GCA_002496345.1	Methanomassiliicoccales	Methanomassiliicoccales	Thermoplasmata	Methanomassiliicoccales	Archaea	Euryarchaeota	Euryarchaeota	Thermoplasmata	Methanomassiliicoccales	Methanomassiliicoccaceae	Methanomassiliicoccus	Methanomassiliicoccus_sp__UBA382	GCA_002496345	Methanomassiliicoccales|Euryarchaeota|Euryarchaeota|Thermoplasmata|Methanomassiliicoccales|Methanomassiliicoccaceae|Methanomassiliicoccus|Methanomassiliicoccus_sp__UBA382|GCA_002496345	Methanomassiliicoccales|Euryarchaeota|Euryarchaeota|Thermoplasmata|Methanomassiliicoccales|Methanomassiliicoccaceae|Methanomassiliicoccus|Methanomassiliicoccus_sp__UBA382|GCA_002496345
GCA_002506995.1	Methanomassiliicoccales	Methanomassiliicoccales	Thermoplasmata	Methanomassiliicoccales	Archaea	Euryarchaeota	Euryarchaeota	Thermoplasmata	Methanomassiliicoccales	Methanomassiliicoccaceae	none	Methanomassiliicoccaceae_archaeon_UBA427	GCA_002506995	Methanomassiliicoccales|Euryarchaeota|Euryarchaeota|Thermoplasmata|Methanomassiliicoccales|Methanomassiliicoccaceae|none|Methanomassiliicoccaceae_archaeon_UBA427|GCA_002506995	Methanomassiliicoccales|Euryarchaeota|Euryarchaeota|Thermoplasmata|Methanomassiliicoccales|Methanomassiliicoccaceae|none|Methanomassiliicoccaceae_archaeon_UBA427|GCA_002506995
GCA_000300255.2	Methanomassiliicoccales	Methanomassiliicoccales	Thermoplasmata	Methanomassiliicoccales	Archaea	Euryarchaeota	Euryarchaeota	Thermoplasmata	Methanomassiliicoccales	Methanomethylophilaceae	Candidatus_Methanomethylophilus	Candidatus_Methanomethylophilus_alvus	GCA_000300255	Methanomassiliicoccales|Euryarchaeota|Euryarchaeota|Thermoplasmata|Methanomassiliicoccales|Methanomethylophilaceae|Candidatus_Methanomethylophilus|Candidatus_Methanomethylophilus_alvus|GCA_000300255	Methanomassiliicoccales|Euryarchaeota|Euryarchaeota|Thermoplasmata|Methanomassiliicoccales|Methanomethylophilaceae|Candidatus_Methanomethylophilus|Candidatus_Methanomethylophilus_alvus|GCA_000300255
GCA_002503985.1	Methanomassiliicoccales	Methanomassiliicoccales	Thermoplasmata	Methanomassiliicoccales	Archaea	Euryarchaeota	Euryarchaeota	Thermoplasmata	Methanomassiliicoccales	none	none	Thermoplasmata_archaeon_UBA61	GCA_002503985	Methanomassiliicoccales|Euryarchaeota|Euryarchaeota|Thermoplasmata|Methanomassiliicoccales|none|none|Thermoplasmata_archaeon_UBA61|GCA_002503985	Methanomassiliicoccales|Euryarchaeota|Euryarchaeota|Thermoplasmata|Methanomassiliicoccales|none|none|Thermoplasmata_archaeon_UBA61|GCA_002503985
GCA_000350305.1	Methanomassiliicoccales	Methanomassiliicoccales	Thermoplasmata	Methanomassiliicoccales	Archaea	Euryarchaeota	Euryarchaeota	Thermoplasmata	Methanomassiliicoccales	none	none	Thermoplasmatales_archaeon_BRNA1	GCA_000350305	Methanomassiliicoccales|Euryarchaeota|Euryarchaeota|Thermoplasmata|Methanomassiliicoccales|none|none|Thermoplasmatales_archaeon_BRNA1|GCA_000350305	Methanomassiliicoccales|Euryarchaeota|Euryarchaeota|Thermoplasmata|Methanomassiliicoccales|none|none|Thermoplasmatales_archaeon_BRNA1|GCA_000350305
GCA_900090055.1	Thermoplasmatales	Thermoplasmatales	Thermoplasmata	Thermoplasmatales	Archaea	Euryarchaeota	Euryarchaeota	Thermoplasmata	Thermoplasmatales	Cuniculiplasmataceae	Cuniculiplasma	Cuniculiplasma_divulgatum	GCA_900090055	Thermoplasmatales|Euryarchaeota|Euryarchaeota|Thermoplasmata|Thermoplasmatales|Cuniculiplasmataceae|Cuniculiplasma|Cuniculiplasma_divulgatum|GCA_900090055	Thermoplasmatales|Euryarchaeota|Euryarchaeota|Thermoplasmata|Thermoplasmatales|Cuniculiplasmataceae|Cuniculiplasma|Cuniculiplasma_divulgatum|GCA_900090055
GCA_002078355.1	Thermoplasmatales	Thermoplasmatales	Thermoplasmata	Thermoplasmatales	Archaea	Euryarchaeota	Euryarchaeota	Thermoplasmata	Thermoplasmatales	Ferroplasmaceae	Ferroplasma	Ferroplasma_acidiphilum	GCA_002078355	Thermoplasmatales|Euryarchaeota|Euryarchaeota|Thermoplasmata|Thermoplasmatales|Ferroplasmaceae|Ferroplasma|Ferroplasma_acidiphilum|GCA_002078355	Thermoplasmatales|Euryarchaeota|Euryarchaeota|Thermoplasmata|Thermoplasmatales|Ferroplasmaceae|Ferroplasma|Ferroplasma_acidiphilum|GCA_002078355
GCA_000447225.1	Thermoplasmatales	Thermoplasmatales	Thermoplasmata	Thermoplasmatales	Archaea	Euryarchaeota	Euryarchaeota	Thermoplasmata	Thermoplasmatales	none	none	Thermoplasmatales_archaeon_A-plasma	GCA_000447225	Thermoplasmatales|Euryarchaeota|Euryarchaeota|Thermoplasmata|Thermoplasmatales|none|none|Thermoplasmatales_archaeon_A-plasma|GCA_000447225	Thermoplasmatales|Euryarchaeota|Euryarchaeota|Thermoplasmata|Thermoplasmatales|none|none|Thermoplasmatales_archaeon_A-plasma|GCA_000447225
GCA_002204705.1	Thermoplasmatales	Thermoplasmatales	Thermoplasmata	Thermoplasmatales	Archaea	Euryarchaeota	Euryarchaeota	Thermoplasmata	Thermoplasmatales	none	none	Thermoplasmatales_archaeon_B_DKE	GCA_002204705	Thermoplasmatales|Euryarchaeota|Euryarchaeota|Thermoplasmata|Thermoplasmatales|none|none|Thermoplasmatales_archaeon_B_DKE|GCA_002204705	Thermoplasmatales|Euryarchaeota|Euryarchaeota|Thermoplasmata|Thermoplasmatales|none|none|Thermoplasmatales_archaeon_B_DKE|GCA_002204705
GCA_002503205.1	Thermoplasmatales	Thermoplasmatales	Thermoplasmata	Thermoplasmatales	Archaea	Euryarchaeota	Euryarchaeota	Thermoplasmata	Thermoplasmatales	none	none	Thermoplasmatales_archaeon_UBA447	GCA_002503205	Thermoplasmatales|Euryarchaeota|Euryarchaeota|Thermoplasmata|Thermoplasmatales|none|none|Thermoplasmatales_archaeon_UBA447|GCA_002503205	Thermoplasmatales|Euryarchaeota|Euryarchaeota|Thermoplasmata|Thermoplasmatales|none|none|Thermoplasmatales_archaeon_UBA447|GCA_002503205
GCA_000008265.1	Thermoplasmatales	Thermoplasmatales	Thermoplasmata	Thermoplasmatales	Archaea	Euryarchaeota	Euryarchaeota	Thermoplasmata	Thermoplasmatales	Picrophilaceae	Picrophilus	Picrophilus_torridus	GCA_000008265	Thermoplasmatales|Euryarchaeota|Euryarchaeota|Thermoplasmata|Thermoplasmatales|Picrophilaceae|Picrophilus|Picrophilus_torridus|GCA_000008265	Thermoplasmatales|Euryarchaeota|Euryarchaeota|Thermoplasmata|Thermoplasmatales|Picrophilaceae|Picrophilus|Picrophilus_torridus|GCA_000008265
GCA_000195915.1	Thermoplasmatales	Thermoplasmatales	Thermoplasmata	Thermoplasmatales	Archaea	Euryarchaeota	Euryarchaeota	Thermoplasmata	Thermoplasmatales	Thermoplasmataceae	Thermoplasma	Thermoplasma_acidophilum	GCA_000195915	Thermoplasmatales|Euryarchaeota|Euryarchaeota|Thermoplasmata|Thermoplasmatales|Thermoplasmataceae|Thermoplasma|Thermoplasma_acidophilum|GCA_000195915	Thermoplasmatales|Euryarchaeota|Euryarchaeota|Thermoplasmata|Thermoplasmatales|Thermoplasmataceae|Thermoplasma|Thermoplasma_acidophilum|GCA_000195915
GCA_000011185.1	Thermoplasmatales	Thermoplasmatales	Thermoplasmata	Thermoplasmatales	Archaea	Euryarchaeota	Euryarchaeota	Thermoplasmata	Thermoplasmatales	Thermoplasmataceae	Thermoplasma	Thermoplasma_volcanium	GCA_000011185	Thermoplasmatales|Euryarchaeota|Euryarchaeota|Thermoplasmata|Thermoplasmatales|Thermoplasmataceae|Thermoplasma|Thermoplasma_volcanium|GCA_000011185	Thermoplasmatales|Euryarchaeota|Euryarchaeota|Thermoplasmata|Thermoplasmatales|Thermoplasmataceae|Thermoplasma|Thermoplasma_volcanium|GCA_000011185
GCA_003663645.1	Thermoplasmata	Thermoplasmata	Thermoplasmata	Thermoplasmata	Archaea	Euryarchaeota	Euryarchaeota	Thermoplasmata	none	none	none	Thermoplasmata_archaeon	GCA_003663645	Thermoplasmata|Euryarchaeota|Euryarchaeota|Thermoplasmata|none|none|none|Thermoplasmata_archaeon|GCA_003663645	Thermoplasmata|Euryarchaeota|Euryarchaeota|Thermoplasmata|none|none|none|Thermoplasmata_archaeon|GCA_003663645
GCA_002838935.1	Thermoplasmata	Thermoplasmata	Thermoplasmata	Thermoplasmata	Archaea	Euryarchaeota	Euryarchaeota	Thermoplasmata	none	none	none	Thermoplasmata_archaeon_HGW-Thermoplasmata-1	GCA_002838935	Thermoplasmata|Euryarchaeota|Euryarchaeota|Thermoplasmata|none|none|none|Thermoplasmata_archaeon_HGW-Thermoplasmata-1|GCA_002838935	Thermoplasmata|Euryarchaeota|Euryarchaeota|Thermoplasmata|none|none|none|Thermoplasmata_archaeon_HGW-Thermoplasmata-1|GCA_002838935
GCA_002900535.1	Thermoplasmata	Thermoplasmata	Thermoplasmata	Thermoplasmata	Archaea	Euryarchaeota	Euryarchaeota	Thermoplasmata	none	none	none	Thermoplasmata_archaeon_M9B1D	GCA_002900535	Thermoplasmata|Euryarchaeota|Euryarchaeota|Thermoplasmata|none|none|none|Thermoplasmata_archaeon_M9B1D|GCA_002900535	Thermoplasmata|Euryarchaeota|Euryarchaeota|Thermoplasmata|none|none|none|Thermoplasmata_archaeon_M9B1D|GCA_002900535
GCA_002011355.1	Thermoplasmata	Thermoplasmata	Thermoplasmata	Thermoplasmata	Archaea	Euryarchaeota	Euryarchaeota	Thermoplasmata	Thermoplasmatales	none	none	Thermoplasmatales_archaeon_JdFR-43	GCA_002011355	Thermoplasmata|Euryarchaeota|Euryarchaeota|Thermoplasmata|Thermoplasmatales|none|none|Thermoplasmatales_archaeon_JdFR-43|GCA_002011355	Thermoplasmata|Euryarchaeota|Euryarchaeota|Thermoplasmata|Thermoplasmatales|none|none|Thermoplasmatales_archaeon_JdFR-43|GCA_002011355
GCA_000025665.1	Acidiprofundales	Acidiprofundales	none	Acidiprofundales	Archaea	Euryarchaeota	Euryarchaeota	none	none	none	Aciduliprofundum	Aciduliprofundum_boonei	GCA_000025665	Acidiprofundales|Euryarchaeota|Euryarchaeota|none|none|none|Aciduliprofundum|Aciduliprofundum_boonei|GCA_000025665	Acidiprofundales|Euryarchaeota|Euryarchaeota|none|none|none|Aciduliprofundum|Aciduliprofundum_boonei|GCA_000025665
GCA_002878135.1	Acidiprofundales	Acidiprofundales	none	Acidiprofundales	Archaea	Euryarchaeota	Euryarchaeota	none	none	none	Aciduliprofundum	Aciduliprofundum_sp_	GCA_002878135	Acidiprofundales|Euryarchaeota|Euryarchaeota|none|none|none|Aciduliprofundum|Aciduliprofundum_sp_|GCA_002878135	Acidiprofundales|Euryarchaeota|Euryarchaeota|none|none|none|Aciduliprofundum|Aciduliprofundum_sp_|GCA_002878135
GCA_000214725.1	Methanobacteriales	Methanobacteriales	Methanobacteria	Methanobacteriales	Archaea	Euryarchaeota	Euryarchaeota	Methanobacteria	Methanobacteriales	Methanobacteriaceae	Methanobacterium	Methanobacterium_paludis	GCA_000214725	Methanobacteriales|Euryarchaeota|Euryarchaeota|Methanobacteria|Methanobacteriales|Methanobacteriaceae|Methanobacterium|Methanobacterium_paludis|GCA_000214725	Methanobacteriales|Euryarchaeota|Euryarchaeota|Methanobacteria|Methanobacteriales|Methanobacteriaceae|Methanobacterium|Methanobacterium_paludis|GCA_000214725
GCA_000529525.1	Methanobacteriales	Methanobacteriales	Methanobacteria	Methanobacteriales	Archaea	Euryarchaeota	Euryarchaeota	Methanobacteria	Methanobacteriales	Methanobacteriaceae	Methanobrevibacter	Methanobrevibacter_oralis	GCA_000529525	Methanobacteriales|Euryarchaeota|Euryarchaeota|Methanobacteria|Methanobacteriales|Methanobacteriaceae|Methanobrevibacter|Methanobrevibacter_oralis|GCA_000529525	Methanobacteriales|Euryarchaeota|Euryarchaeota|Methanobacteria|Methanobacteriales|Methanobacteriaceae|Methanobrevibacter|Methanobrevibacter_oralis|GCA_000529525
GCA_000016525.1	Methanobacteriales	Methanobacteriales	Methanobacteria	Methanobacteriales	Archaea	Euryarchaeota	Euryarchaeota	Methanobacteria	Methanobacteriales	Methanobacteriaceae	Methanobrevibacter	Methanobrevibacter_smithii	GCA_000016525	Methanobacteriales|Euryarchaeota|Euryarchaeota|Methanobacteria|Methanobacteriales|Methanobacteriaceae|Methanobrevibacter|Methanobrevibacter_smithii|GCA_000016525	Methanobacteriales|Euryarchaeota|Euryarchaeota|Methanobacteria|Methanobacteriales|Methanobacteriaceae|Methanobrevibacter|Methanobrevibacter_smithii|GCA_000016525
GCA_000012545.1	Methanobacteriales	Methanobacteriales	Methanobacteria	Methanobacteriales	Archaea	Euryarchaeota	Euryarchaeota	Methanobacteria	Methanobacteriales	Methanobacteriaceae	Methanosphaera	Methanosphaera_stadtmanae	GCA_000012545	Methanobacteriales|Euryarchaeota|Euryarchaeota|Methanobacteria|Methanobacteriales|Methanobacteriaceae|Methanosphaera|Methanosphaera_stadtmanae|GCA_000012545	Methanobacteriales|Euryarchaeota|Euryarchaeota|Methanobacteria|Methanobacteriales|Methanobacteriaceae|Methanosphaera|Methanosphaera_stadtmanae|GCA_000012545
GCA_000145295.1	Methanobacteriales	Methanobacteriales	Methanobacteria	Methanobacteriales	Archaea	Euryarchaeota	Euryarchaeota	Methanobacteria	Methanobacteriales	Methanobacteriaceae	Methanothermobacter	Methanothermobacter_marburgensis	GCA_000145295	Methanobacteriales|Euryarchaeota|Euryarchaeota|Methanobacteria|Methanobacteriales|Methanobacteriaceae|Methanothermobacter|Methanothermobacter_marburgensis|GCA_000145295	Methanobacteriales|Euryarchaeota|Euryarchaeota|Methanobacteria|Methanobacteriales|Methanobacteriaceae|Methanothermobacter|Methanothermobacter_marburgensis|GCA_000145295
GCA_000166095.1	Methanobacteriales	Methanobacteriales	Methanobacteria	Methanobacteriales	Archaea	Euryarchaeota	Euryarchaeota	Methanobacteria	Methanobacteriales	Methanothermaceae	Methanothermus	Methanothermus_fervidus	GCA_000166095	Methanobacteriales|Euryarchaeota|Euryarchaeota|Methanobacteria|Methanobacteriales|Methanothermaceae|Methanothermus|Methanothermus_fervidus|GCA_000166095	Methanobacteriales|Euryarchaeota|Euryarchaeota|Methanobacteria|Methanobacteriales|Methanothermaceae|Methanothermus|Methanothermus_fervidus|GCA_000166095
GCA_002011125.1	Hydrothermarchaeota	Hydrothermarchaeota	Hydrothermarchaeota	Hydrothermarchaeota	Archaea	Euryarchaeota	Euryarchaeota	Hydrothermarchaeota	none	none	none	Candidatus_Hydrothermarchaeota_archaeon_JdFR-18	GCA_002011125	Hydrothermarchaeota|Euryarchaeota|Euryarchaeota|Hydrothermarchaeota|none|none|none|Candidatus_Hydrothermarchaeota_archaeon_JdFR-18|GCA_002011125	Hydrothermarchaeota|Euryarchaeota|Euryarchaeota|Hydrothermarchaeota|none|none|none|Candidatus_Hydrothermarchaeota_archaeon_JdFR-18|GCA_002011125
GCA_003230355.1	Hydrothermarchaeota	Hydrothermarchaeota	none	Hydrothermarchaeota	Archaea	Euryarchaeota	Hydrothermarchaeota	none	none	none	none	Euryarchaeota_archaeon	GCA_003230355	Hydrothermarchaeota|Euryarchaeota|Hydrothermarchaeota|none|none|none|none|Euryarchaeota_archaeon|GCA_003230355	Hydrothermarchaeota|Euryarchaeota|Hydrothermarchaeota|none|none|none|none|Euryarchaeota_archaeon|GCA_003230355
GCA_000023985.1	Methanococcales	Methanococcales	Methanococci	Methanococcales	Archaea	Euryarchaeota	Euryarchaeota	Methanococci	Methanococcales	Methanocaldococcaceae	Methanocaldococcus	Methanocaldococcus_fervens	GCA_000023985	Methanococcales|Euryarchaeota|Euryarchaeota|Methanococci|Methanococcales|Methanocaldococcaceae|Methanocaldococcus|Methanocaldococcus_fervens|GCA_000023985	Methanococcales|Euryarchaeota|Euryarchaeota|Methanococci|Methanococcales|Methanocaldococcaceae|Methanocaldococcus|Methanocaldococcus_fervens|GCA_000023985
GCA_000092305.1	Methanococcales	Methanococcales	Methanococci	Methanococcales	Archaea	Euryarchaeota	Euryarchaeota	Methanococci	Methanococcales	Methanocaldococcaceae	Methanocaldococcus	Methanocaldococcus_infernus	GCA_000092305	Methanococcales|Euryarchaeota|Euryarchaeota|Methanococci|Methanococcales|Methanocaldococcaceae|Methanocaldococcus|Methanocaldococcus_infernus|GCA_000092305	Methanococcales|Euryarchaeota|Euryarchaeota|Methanococci|Methanococcales|Methanocaldococcaceae|Methanocaldococcus|Methanocaldococcus_infernus|GCA_000092305
GCA_000214415.1	Methanococcales	Methanococcales	Methanococci	Methanococcales	Archaea	Euryarchaeota	Euryarchaeota	Methanococci	Methanococcales	Methanocaldococcaceae	Methanotorris	Methanotorris_igneus	GCA_000214415	Methanococcales|Euryarchaeota|Euryarchaeota|Methanococci|Methanococcales|Methanocaldococcaceae|Methanotorris|Methanotorris_igneus|GCA_000214415	Methanococcales|Euryarchaeota|Euryarchaeota|Methanococci|Methanococcales|Methanocaldococcaceae|Methanotorris|Methanotorris_igneus|GCA_000214415
GCA_000017185.1	Methanococcales	Methanococcales	Methanococci	Methanococcales	Archaea	Euryarchaeota	Euryarchaeota	Methanococci	Methanococcales	Methanococcaceae	Methanococcus	Methanococcus_aeolicus	GCA_000017185	Methanococcales|Euryarchaeota|Euryarchaeota|Methanococci|Methanococcales|Methanococcaceae|Methanococcus|Methanococcus_aeolicus|GCA_000017185	Methanococcales|Euryarchaeota|Euryarchaeota|Methanococci|Methanococcales|Methanococcaceae|Methanococcus|Methanococcus_aeolicus|GCA_000017185
GCA_000017165.1	Methanococcales	Methanococcales	Methanococci	Methanococcales	Archaea	Euryarchaeota	Euryarchaeota	Methanococci	Methanococcales	Methanococcaceae	Methanococcus	Methanococcus_vannielii	GCA_000017165	Methanococcales|Euryarchaeota|Euryarchaeota|Methanococci|Methanococcales|Methanococcaceae|Methanococcus|Methanococcus_vannielii|GCA_000017165	Methanococcales|Euryarchaeota|Euryarchaeota|Methanococci|Methanococcales|Methanococcaceae|Methanococcus|Methanococcus_vannielii|GCA_000017165
GCA_000007185.1	Methanopyrales	Methanopyrales	Methanopyri	Methanopyrales	Archaea	Euryarchaeota	Euryarchaeota	Methanopyri	Methanopyrales	Methanopyraceae	Methanopyrus	Methanopyrus_kandleri	GCA_000007185	Methanopyrales|Euryarchaeota|Euryarchaeota|Methanopyri|Methanopyrales|Methanopyraceae|Methanopyrus|Methanopyrus_kandleri|GCA_000007185	Methanopyrales|Euryarchaeota|Euryarchaeota|Methanopyri|Methanopyrales|Methanopyraceae|Methanopyrus|Methanopyrus_kandleri|GCA_000007185
GCA_000725425.1	Thermococcales	Thermococcales	Thermococci	Thermococcales	Archaea	Euryarchaeota	Euryarchaeota	Thermococci	Thermococcales	Thermococcaceae	Palaeococcus	Palaeococcus_pacificus	GCA_000725425	Thermococcales|Euryarchaeota|Euryarchaeota|Thermococci|Thermococcales|Thermococcaceae|Palaeococcus|Palaeococcus_pacificus|GCA_000725425	Thermococcales|Euryarchaeota|Euryarchaeota|Thermococci|Thermococcales|Thermococcaceae|Palaeococcus|Palaeococcus_pacificus|GCA_000725425
GCA_000007305.1	Thermococcales	Thermococcales	Thermococci	Thermococcales	Archaea	Euryarchaeota	Euryarchaeota	Thermococci	Thermococcales	Thermococcaceae	Pyrococcus	Pyrococcus_furiosus	GCA_000007305	Thermococcales|Euryarchaeota|Euryarchaeota|Thermococci|Thermococcales|Thermococcaceae|Pyrococcus|Pyrococcus_furiosus|GCA_000007305	Thermococcales|Euryarchaeota|Euryarchaeota|Thermococci|Thermococcales|Thermococcaceae|Pyrococcus|Pyrococcus_furiosus|GCA_000007305
GCA_000011105.1	Thermococcales	Thermococcales	Thermococci	Thermococcales	Archaea	Euryarchaeota	Euryarchaeota	Thermococci	Thermococcales	Thermococcaceae	Pyrococcus	Pyrococcus_horikoshii	GCA_000011105	Thermococcales|Euryarchaeota|Euryarchaeota|Thermococci|Thermococcales|Thermococcaceae|Pyrococcus|Pyrococcus_horikoshii|GCA_000011105	Thermococcales|Euryarchaeota|Euryarchaeota|Thermococci|Thermococcales|Thermococcaceae|Pyrococcus|Pyrococcus_horikoshii|GCA_000011105
GCA_000151105.2	Thermococcales	Thermococcales	Thermococci	Thermococcales	Archaea	Euryarchaeota	Euryarchaeota	Thermococci	Thermococcales	Thermococcaceae	Thermococcus	Thermococcus_barophilus	GCA_000151105	Thermococcales|Euryarchaeota|Euryarchaeota|Thermococci|Thermococcales|Thermococcaceae|Thermococcus|Thermococcus_barophilus|GCA_000151105	Thermococcales|Euryarchaeota|Euryarchaeota|Thermococci|Thermococcales|Thermococcaceae|Thermococcus|Thermococcus_barophilus|GCA_000151105
GCA_000246985.3	Thermococcales	Thermococcales	Thermococci	Thermococcales	Archaea	Euryarchaeota	Euryarchaeota	Thermococci	Thermococcales	Thermococcaceae	Thermococcus	Thermococcus_litoralis	GCA_000246985	Thermococcales|Euryarchaeota|Euryarchaeota|Thermococci|Thermococcales|Thermococcaceae|Thermococcus|Thermococcus_litoralis|GCA_000246985	Thermococcales|Euryarchaeota|Euryarchaeota|Thermococci|Thermococcales|Thermococcaceae|Thermococcus|Thermococcus_litoralis|GCA_000246985
GCA_002214545.1	Thermococcales	Thermococcales	Thermococci	Thermococcales	Archaea	Euryarchaeota	Euryarchaeota	Thermococci	Thermococcales	Thermococcaceae	Thermococcus	Thermococcus_thioreducens	GCA_002214545	Thermococcales|Euryarchaeota|Euryarchaeota|Thermococci|Thermococcales|Thermococcaceae|Thermococcus|Thermococcus_thioreducens|GCA_002214545	Thermococcales|Euryarchaeota|Euryarchaeota|Thermococci|Thermococcales|Thermococcaceae|Thermococcus|Thermococcus_thioreducens|GCA_002214545
GCA_001587575.1	Methanofastidiosa	Methanofastidiosa	Thermococci	Methanofastidiosa	Archaea	Euryarchaeota	Euryarchaeota	Thermococci	Methanofastidiosa	none	none	Arc_I_group_archaeon_BMIXfssc0709_Meth_Bin006	GCA_001587575	Methanofastidiosa|Euryarchaeota|Euryarchaeota|Thermococci|Methanofastidiosa|none|none|Arc_I_group_archaeon_BMIXfssc0709_Meth_Bin006|GCA_001587575	Methanofastidiosa|Euryarchaeota|Euryarchaeota|Thermococci|Methanofastidiosa|none|none|Arc_I_group_archaeon_BMIXfssc0709_Meth_Bin006|GCA_001587575
GCA_001595815.1	Theionarchaea	Theionarchaea	Theionarchaea	Theionarchaea	Archaea	Euryarchaeota	Euryarchaeota	Theionarchaea	none	none	none	Theionarchaea_archaeon_DG-70-1	GCA_001595815	Theionarchaea|Euryarchaeota|Euryarchaeota|Theionarchaea|none|none|none|Theionarchaea_archaeon_DG-70-1|GCA_001595815	Theionarchaea|Euryarchaeota|Euryarchaeota|Theionarchaea|none|none|none|Theionarchaea_archaeon_DG-70-1|GCA_001595815
GCA_004347835.1	Hadesarchaea	Hadesarchaea	Hadesarchaea	Hadesarchaea	Archaea	Euryarchaeota	Euryarchaeota	Hadesarchaea	none	none	none	Hadesarchaea_archaeon	GCA_004347835	Hadesarchaea|Euryarchaeota|Euryarchaeota|Hadesarchaea|none|none|none|Hadesarchaea_archaeon|GCA_004347835	Hadesarchaea|Euryarchaeota|Euryarchaeota|Hadesarchaea|none|none|none|Hadesarchaea_archaeon|GCA_004347835
GCA_001515185.1	Hadesarchaea	Hadesarchaea	Hadesarchaea	Hadesarchaea	Archaea	Euryarchaeota	Euryarchaeota	Hadesarchaea	none	none	none	Hadesarchaea_archaeon_DG-33	GCA_001515185	Hadesarchaea|Euryarchaeota|Euryarchaeota|Hadesarchaea|none|none|none|Hadesarchaea_archaeon_DG-33|GCA_001515185	Hadesarchaea|Euryarchaeota|Euryarchaeota|Hadesarchaea|none|none|none|Hadesarchaea_archaeon_DG-33|GCA_001515185
GCA_001515205.2	Hadesarchaea	Hadesarchaea	Hadesarchaea	Hadesarchaea	Archaea	Euryarchaeota	Euryarchaeota	Hadesarchaea	none	none	none	Hadesarchaea_archaeon_YNP_45	GCA_001515205	Hadesarchaea|Euryarchaeota|Euryarchaeota|Hadesarchaea|none|none|none|Hadesarchaea_archaeon_YNP_45|GCA_001515205	Hadesarchaea|Euryarchaeota|Euryarchaeota|Hadesarchaea|none|none|none|Hadesarchaea_archaeon_YNP_45|GCA_001515205
GCA_001549215.1	Persephonarchaea	Persephonarchaea	Persephonarchaea	Persephonarchaea	Archaea	Euryarchaeota	Euryarchaeota	Persephonarchaea	none	none	none	candidate_division_MSBL1_archaeon_SCGC-AAA261F19	GCA_001549215	Persephonarchaea|Euryarchaeota|Euryarchaeota|Persephonarchaea|none|none|none|candidate_division_MSBL1_archaeon_SCGC-AAA261F19|GCA_001549215	Persephonarchaea|Euryarchaeota|Euryarchaeota|Persephonarchaea|none|none|none|candidate_division_MSBL1_archaeon_SCGC-AAA261F19|GCA_001549215
GCA_001549225.1	Persephonarchaea	Persephonarchaea	Persephonarchaea	Persephonarchaea	Archaea	Euryarchaeota	Euryarchaeota	Persephonarchaea	none	none	none	candidate_division_MSBL1_archaeon_SCGC-AAA261O19	GCA_001549225	Persephonarchaea|Euryarchaeota|Euryarchaeota|Persephonarchaea|none|none|none|candidate_division_MSBL1_archaeon_SCGC-AAA261O19|GCA_001549225	Persephonarchaea|Euryarchaeota|Euryarchaeota|Persephonarchaea|none|none|none|candidate_division_MSBL1_archaeon_SCGC-AAA261O19|GCA_001549225
GCA_003649375.1	Thermoproteales	Thermoproteales	Thermoprotei	Thermoproteales	Archaea	TACK	Crenarchaeota	Thermoprotei	none	none	none	Thermoprotei_archaeon	GCA_003649375	Thermoproteales|TACK|Crenarchaeota|Thermoprotei|none|none|none|Thermoprotei_archaeon|GCA_003649375	Thermoproteales|TACK|Crenarchaeota|Thermoprotei|none|none|none|Thermoprotei_archaeon|GCA_003649375
GCA_003650785.1	Thermoproteales	Thermoproteales	Thermoprotei	Thermoproteales	Archaea	TACK	Crenarchaeota	Thermoprotei	none	none	none	Thermoprotei_archaeon	GCA_003650785	Thermoproteales|TACK|Crenarchaeota|Thermoprotei|none|none|none|Thermoprotei_archaeon|GCA_003650785	Thermoproteales|TACK|Crenarchaeota|Thermoprotei|none|none|none|Thermoprotei_archaeon|GCA_003650785
GCA_000015225.1	Thermoproteales	Thermoproteales	Thermoprotei	Thermoproteales	Archaea	TACK	Crenarchaeota	Thermoprotei	Thermoproteales	Thermofilaceae	Thermofilum	Thermofilum_pendens	GCA_000015225	Thermoproteales|TACK|Crenarchaeota|Thermoprotei|Thermoproteales|Thermofilaceae|Thermofilum|Thermofilum_pendens|GCA_000015225	Thermoproteales|TACK|Crenarchaeota|Thermoprotei|Thermoproteales|Thermofilaceae|Thermofilum|Thermofilum_pendens|GCA_000015225
GCA_000018305.1	Thermoproteales	Thermoproteales	Thermoprotei	Thermoproteales	Archaea	TACK	Crenarchaeota	Thermoprotei	Thermoproteales	Thermoproteaceae	Caldivirga	Caldivirga_maquilingensis	GCA_000018305	Thermoproteales|TACK|Crenarchaeota|Thermoprotei|Thermoproteales|Thermoproteaceae|Caldivirga|Caldivirga_maquilingensis|GCA_000018305	Thermoproteales|TACK|Crenarchaeota|Thermoprotei|Thermoproteales|Thermoproteaceae|Caldivirga|Caldivirga_maquilingensis|GCA_000018305
GCA_000015805.1	Thermoproteales	Thermoproteales	Thermoprotei	Thermoproteales	Archaea	TACK	Crenarchaeota	Thermoprotei	Thermoproteales	Thermoproteaceae	Pyrobaculum	Pyrobaculum_calidifontis	GCA_000015805	Thermoproteales|TACK|Crenarchaeota|Thermoprotei|Thermoproteales|Thermoproteaceae|Pyrobaculum|Pyrobaculum_calidifontis|GCA_000015805	Thermoproteales|TACK|Crenarchaeota|Thermoprotei|Thermoproteales|Thermoproteaceae|Pyrobaculum|Pyrobaculum_calidifontis|GCA_000015805
GCA_000234805.1	Thermoproteales	Thermoproteales	Thermoprotei	Thermoproteales	Archaea	TACK	Crenarchaeota	Thermoprotei	Thermoproteales	Thermoproteaceae	Pyrobaculum	Pyrobaculum_ferrireducens	GCA_000234805	Thermoproteales|TACK|Crenarchaeota|Thermoprotei|Thermoproteales|Thermoproteaceae|Pyrobaculum|Pyrobaculum_ferrireducens|GCA_000234805	Thermoproteales|TACK|Crenarchaeota|Thermoprotei|Thermoproteales|Thermoproteaceae|Pyrobaculum|Pyrobaculum_ferrireducens|GCA_000234805
GCA_001315925.1	Thermoproteales	Thermoproteales	Thermoprotei	Thermoproteales	Archaea	TACK	Crenarchaeota	Thermoprotei	Thermoproteales	Thermoproteaceae	Thermocladium	Thermocladium_modestius	GCA_001315925	Thermoproteales|TACK|Crenarchaeota|Thermoprotei|Thermoproteales|Thermoproteaceae|Thermocladium|Thermocladium_modestius|GCA_001315925	Thermoproteales|TACK|Crenarchaeota|Thermoprotei|Thermoproteales|Thermoproteaceae|Thermocladium|Thermocladium_modestius|GCA_001315925
GCA_000193375.1	Thermoproteales	Thermoproteales	Thermoprotei	Thermoproteales	Archaea	TACK	Crenarchaeota	Thermoprotei	Thermoproteales	Thermoproteaceae	Thermoproteus	Thermoproteus_uzoniensis	GCA_000193375	Thermoproteales|TACK|Crenarchaeota|Thermoprotei|Thermoproteales|Thermoproteaceae|Thermoproteus|Thermoproteus_uzoniensis|GCA_000193375	Thermoproteales|TACK|Crenarchaeota|Thermoprotei|Thermoproteales|Thermoproteaceae|Thermoproteus|Thermoproteus_uzoniensis|GCA_000193375
GCA_000148385.1	Thermoproteales	Thermoproteales	Thermoprotei	Thermoproteales	Archaea	TACK	Crenarchaeota	Thermoprotei	Thermoproteales	Thermoproteaceae	Vulcanisaeta	Vulcanisaeta_distributa	GCA_000148385	Thermoproteales|TACK|Crenarchaeota|Thermoprotei|Thermoproteales|Thermoproteaceae|Vulcanisaeta|Vulcanisaeta_distributa|GCA_000148385	Thermoproteales|TACK|Crenarchaeota|Thermoprotei|Thermoproteales|Thermoproteaceae|Vulcanisaeta|Vulcanisaeta_distributa|GCA_000148385
GCA_001748385.1	Thermoproteales	Thermoproteales	Thermoprotei	Thermoproteales	Archaea	TACK	Crenarchaeota	Thermoprotei	Thermoproteales	Thermoproteaceae	Vulcanisaeta	Vulcanisaeta_thermophila	GCA_001748385	Thermoproteales|TACK|Crenarchaeota|Thermoprotei|Thermoproteales|Thermoproteaceae|Vulcanisaeta|Vulcanisaeta_thermophila|GCA_001748385	Thermoproteales|TACK|Crenarchaeota|Thermoprotei|Thermoproteales|Thermoproteaceae|Vulcanisaeta|Vulcanisaeta_thermophila|GCA_001748385
GCA_000398765.1	Geoarchaeales	Geoarchaeales	Thermoprotei	Geoarchaeales	Archaea	TACK	Crenarchaeota	Thermoprotei	Geoarchaeales	Geoarchaeaceae	none	Crenarchaeota_archaeon_SCGC_AAA471-O08	GCA_000398765	Geoarchaeales|TACK|Crenarchaeota|Thermoprotei|Geoarchaeales|Geoarchaeaceae|none|Crenarchaeota_archaeon_SCGC_AAA471-O08|GCA_000398765	Geoarchaeales|TACK|Crenarchaeota|Thermoprotei|Geoarchaeales|Geoarchaeaceae|none|Crenarchaeota_archaeon_SCGC_AAA471-O08|GCA_000398765
GCA_000402095.1	Geoarchaeales	Geoarchaeales	Thermoprotei	Geoarchaeales	Archaea	TACK	Crenarchaeota	Thermoprotei	Geoarchaeales	none	none	Crenarchaeota_archaeon_SCGC_AAA471-L13	GCA_000402095	Geoarchaeales|TACK|Crenarchaeota|Thermoprotei|Geoarchaeales|none|none|Crenarchaeota_archaeon_SCGC_AAA471-L13|GCA_000402095	Geoarchaeales|TACK|Crenarchaeota|Thermoprotei|Geoarchaeales|none|none|Crenarchaeota_archaeon_SCGC_AAA471-L13|GCA_000402095
GCA_004347915.1	Nezhaarchaeota	Nezhaarchaeota	none	Nezhaarchaeota	Archaea	TACK	Nezhaarchaeota	none	none	none	none	Candidatus_Nezhaarchaeota_archaeon_WYZ-LMO7	GCA_004347915	Nezhaarchaeota|TACK|Nezhaarchaeota|none|none|none|none|Candidatus_Nezhaarchaeota_archaeon_WYZ-LMO7|GCA_004347915	Nezhaarchaeota|TACK|Nezhaarchaeota|none|none|none|none|Candidatus_Nezhaarchaeota_archaeon_WYZ-LMO7|GCA_004347915
GCA_003649605.1	Nezhaarchaeota	Nezhaarchaeota	Thermoprotei	Nezhaarchaeota	Archaea	TACK	Nezhaarchaeota	Thermoprotei	none	none	none	Thermoprotei_archaeon	GCA_003649605	Nezhaarchaeota|TACK|Nezhaarchaeota|Thermoprotei|none|none|none|Thermoprotei_archaeon|GCA_003649605	Nezhaarchaeota|TACK|Nezhaarchaeota|Thermoprotei|none|none|none|Thermoprotei_archaeon|GCA_003649605
GCA_003650865.1	Nezhaarchaeota	Nezhaarchaeota	Thermoprotei	Nezhaarchaeota	Archaea	TACK	Nezhaarchaeota	Thermoprotei	none	none	none	Thermoprotei_archaeon	GCA_003650865	Nezhaarchaeota|TACK|Nezhaarchaeota|Thermoprotei|none|none|none|Thermoprotei_archaeon|GCA_003650865	Nezhaarchaeota|TACK|Nezhaarchaeota|Thermoprotei|none|none|none|Thermoprotei_archaeon|GCA_003650865
GCA_001717005.1	Verstraetearchaeota	Verstraetearchaeota	Methanomethylia	Verstraetearchaeota	Archaea	TACK	Verstraetearchaeota	Methanomethylia	Methanomethyliales	Methanomethyliaceae	Candidatus_Methanomethylicus	Candidatus_Methanomethylicus_mesodigestum	GCA_001717005	Verstraetearchaeota|TACK|Verstraetearchaeota|Methanomethylia|Methanomethyliales|Methanomethyliaceae|Candidatus_Methanomethylicus|Candidatus_Methanomethylicus_mesodigestum|GCA_001717005	Verstraetearchaeota|TACK|Verstraetearchaeota|Methanomethylia|Methanomethyliales|Methanomethyliaceae|Candidatus_Methanomethylicus|Candidatus_Methanomethylicus_mesodigestum|GCA_001717005
GCA_001717025.1	Verstraetearchaeota	Verstraetearchaeota	Methanomethylia	Verstraetearchaeota	Archaea	TACK	Verstraetearchaeota	Methanomethylia	Methanomethyliales	Methanomethyliaceae	Candidatus_Methanomethylicus	Candidatus_Methanomethylicus_oleusabulum	GCA_001717025	Verstraetearchaeota|TACK|Verstraetearchaeota|Methanomethylia|Methanomethyliales|Methanomethyliaceae|Candidatus_Methanomethylicus|Candidatus_Methanomethylicus_oleusabulum|GCA_001717025	Verstraetearchaeota|TACK|Verstraetearchaeota|Methanomethylia|Methanomethyliales|Methanomethyliaceae|Candidatus_Methanomethylicus|Candidatus_Methanomethylicus_oleusabulum|GCA_001717025
GCA_001717015.1	Verstraetearchaeota	Verstraetearchaeota	Methanomethylia	Verstraetearchaeota	Archaea	TACK	Verstraetearchaeota	Methanomethylia	Methanomethyliales	Methanomethyliaceae	Candidatus_Methanosuratus	Candidatus_Methanosuratus_petracarbonis	GCA_001717015	Verstraetearchaeota|TACK|Verstraetearchaeota|Methanomethylia|Methanomethyliales|Methanomethyliaceae|Candidatus_Methanosuratus|Candidatus_Methanosuratus_petracarbonis|GCA_001717015	Verstraetearchaeota|TACK|Verstraetearchaeota|Methanomethylia|Methanomethyliales|Methanomethyliaceae|Candidatus_Methanosuratus|Candidatus_Methanosuratus_petracarbonis|GCA_001717015
GCA_004028775.1	Verstraetearchaeota	Verstraetearchaeota	Methanomethylia	Verstraetearchaeota	Archaea	TACK	Verstraetearchaeota	Methanomethylia	Methanomethyliales	Methanomethyliaceae	Candidatus_Methanosuratus	Candidatus_Methanosuratus_subterraneum	GCA_004028775	Verstraetearchaeota|TACK|Verstraetearchaeota|Methanomethylia|Methanomethyliales|Methanomethyliaceae|Candidatus_Methanosuratus|Candidatus_Methanosuratus_subterraneum|GCA_004028775	Verstraetearchaeota|TACK|Verstraetearchaeota|Methanomethylia|Methanomethyliales|Methanomethyliaceae|Candidatus_Methanosuratus|Candidatus_Methanosuratus_subterraneum|GCA_004028775
GCA_003649185.1	Verstraetearchaeota	Verstraetearchaeota	none	Verstraetearchaeota	Archaea	TACK	Verstraetearchaeota	none	none	none	none	Candidatus_Verstraetearchaeota_archaeon	GCA_003649185	Verstraetearchaeota|TACK|Verstraetearchaeota|none|none|none|none|Candidatus_Verstraetearchaeota_archaeon|GCA_003649185	Verstraetearchaeota|TACK|Verstraetearchaeota|none|none|none|none|Candidatus_Verstraetearchaeota_archaeon|GCA_003649185
GCA_004348015.1	Verstraetearchaeota	Verstraetearchaeota	none	Verstraetearchaeota	Archaea	TACK	Verstraetearchaeota	none	none	none	none	Candidatus_Verstraetearchaeota_archaeon	GCA_004348015	Verstraetearchaeota|TACK|Verstraetearchaeota|none|none|none|none|Candidatus_Verstraetearchaeota_archaeon|GCA_004348015	Verstraetearchaeota|TACK|Verstraetearchaeota|none|none|none|none|Candidatus_Verstraetearchaeota_archaeon|GCA_004348015
GCA_003431325.1	Desulfurococcales	Desulfurococcales	Thermoprotei	Desulfurococcales	Archaea	TACK	Crenarchaeota	Thermoprotei	Desulfurococcales	Acidilobaceae	Acidilobus	Acidilobus_sp__7A	GCA_003431325	Desulfurococcales|TACK|Crenarchaeota|Thermoprotei|Desulfurococcales|Acidilobaceae|Acidilobus|Acidilobus_sp__7A|GCA_003431325	Desulfurococcales|TACK|Crenarchaeota|Thermoprotei|Desulfurococcales|Acidilobaceae|Acidilobus|Acidilobus_sp__7A|GCA_003431325
GCA_000317795.1	Desulfurococcales	Desulfurococcales	Thermoprotei	Desulfurococcales	Archaea	TACK	Crenarchaeota	Thermoprotei	Desulfurococcales	Caldisphaeraceae	Caldisphaera	Caldisphaera_lagunensis	GCA_000317795	Desulfurococcales|TACK|Crenarchaeota|Thermoprotei|Desulfurococcales|Caldisphaeraceae|Caldisphaera|Caldisphaera_lagunensis|GCA_000317795	Desulfurococcales|TACK|Crenarchaeota|Thermoprotei|Desulfurococcales|Caldisphaeraceae|Caldisphaera|Caldisphaera_lagunensis|GCA_000317795
GCA_000011125.1	Desulfurococcales	Desulfurococcales	Thermoprotei	Desulfurococcales	Archaea	TACK	Crenarchaeota	Thermoprotei	Desulfurococcales	Desulfurococcaceae	Aeropyrum	Aeropyrum_pernix	GCA_000011125	Desulfurococcales|TACK|Crenarchaeota|Thermoprotei|Desulfurococcales|Desulfurococcaceae|Aeropyrum|Aeropyrum_pernix|GCA_000011125	Desulfurococcales|TACK|Crenarchaeota|Thermoprotei|Desulfurococcales|Desulfurococcaceae|Aeropyrum|Aeropyrum_pernix|GCA_000011125
GCA_000020905.1	Desulfurococcales	Desulfurococcales	Thermoprotei	Desulfurococcales	Archaea	TACK	Crenarchaeota	Thermoprotei	Desulfurococcales	Desulfurococcaceae	Desulfurococcus	Desulfurococcus_amylolyticus	GCA_000020905	Desulfurococcales|TACK|Crenarchaeota|Thermoprotei|Desulfurococcales|Desulfurococcaceae|Desulfurococcus|Desulfurococcus_amylolyticus|GCA_000020905	Desulfurococcales|TACK|Crenarchaeota|Thermoprotei|Desulfurococcales|Desulfurococcaceae|Desulfurococcus|Desulfurococcus_amylolyticus|GCA_000020905
GCA_000017945.1	Desulfurococcales	Desulfurococcales	Thermoprotei	Desulfurococcales	Archaea	TACK	Crenarchaeota	Thermoprotei	Desulfurococcales	Desulfurococcaceae	Ignicoccus	Ignicoccus_hospitalis	GCA_000017945	Desulfurococcales|TACK|Crenarchaeota|Thermoprotei|Desulfurococcales|Desulfurococcaceae|Ignicoccus|Ignicoccus_hospitalis|GCA_000017945	Desulfurococcales|TACK|Crenarchaeota|Thermoprotei|Desulfurococcales|Desulfurococcaceae|Ignicoccus|Ignicoccus_hospitalis|GCA_000017945
GCA_001481685.1	Desulfurococcales	Desulfurococcales	Thermoprotei	Desulfurococcales	Archaea	TACK	Crenarchaeota	Thermoprotei	Desulfurococcales	Desulfurococcaceae	Ignicoccus	Ignicoccus_islandicus	GCA_001481685	Desulfurococcales|TACK|Crenarchaeota|Thermoprotei|Desulfurococcales|Desulfurococcaceae|Ignicoccus|Ignicoccus_islandicus|GCA_001481685	Desulfurococcales|TACK|Crenarchaeota|Thermoprotei|Desulfurococcales|Desulfurococcaceae|Ignicoccus|Ignicoccus_islandicus|GCA_001481685
GCA_000015945.1	Desulfurococcales	Desulfurococcales	Thermoprotei	Desulfurococcales	Archaea	TACK	Crenarchaeota	Thermoprotei	Desulfurococcales	Desulfurococcaceae	Staphylothermus	Staphylothermus_marinus	GCA_000015945	Desulfurococcales|TACK|Crenarchaeota|Thermoprotei|Desulfurococcales|Desulfurococcaceae|Staphylothermus|Staphylothermus_marinus|GCA_000015945	Desulfurococcales|TACK|Crenarchaeota|Thermoprotei|Desulfurococcales|Desulfurococcaceae|Staphylothermus|Staphylothermus_marinus|GCA_000015945
GCA_000264495.1	Desulfurococcales	Desulfurococcales	Thermoprotei	Desulfurococcales	Archaea	TACK	Crenarchaeota	Thermoprotei	Desulfurococcales	Desulfurococcaceae	Thermogladius	Thermogladius_calderae	GCA_000264495	Desulfurococcales|TACK|Crenarchaeota|Thermoprotei|Desulfurococcales|Desulfurococcaceae|Thermogladius|Thermogladius_calderae|GCA_000264495	Desulfurococcales|TACK|Crenarchaeota|Thermoprotei|Desulfurococcales|Desulfurococcaceae|Thermogladius|Thermogladius_calderae|GCA_000264495
GCA_000092185.1	Desulfurococcales	Desulfurococcales	Thermoprotei	Desulfurococcales	Archaea	TACK	Crenarchaeota	Thermoprotei	Desulfurococcales	Desulfurococcaceae	Thermosphaera	Thermosphaera_aggregans	GCA_000092185	Desulfurococcales|TACK|Crenarchaeota|Thermoprotei|Desulfurococcales|Desulfurococcaceae|Thermosphaera|Thermosphaera_aggregans|GCA_000092185	Desulfurococcales|TACK|Crenarchaeota|Thermoprotei|Desulfurococcales|Desulfurococcaceae|Thermosphaera|Thermosphaera_aggregans|GCA_000092185
GCA_000258425.1	Desulfurococcales	Desulfurococcales	Thermoprotei	Desulfurococcales	Archaea	TACK	Crenarchaeota	Thermoprotei	Desulfurococcales	Fervidicoccaceae	Fervidicoccus	Fervidicoccus_fontis	GCA_000258425	Desulfurococcales|TACK|Crenarchaeota|Thermoprotei|Desulfurococcales|Fervidicoccaceae|Fervidicoccus|Fervidicoccus_fontis|GCA_000258425	Desulfurococcales|TACK|Crenarchaeota|Thermoprotei|Desulfurococcales|Fervidicoccaceae|Fervidicoccus|Fervidicoccus_fontis|GCA_000258425
GCA_000015145.1	Desulfurococcales	Desulfurococcales	Thermoprotei	Desulfurococcales	Archaea	TACK	Crenarchaeota	Thermoprotei	Desulfurococcales	Pyrodictiaceae	Hyperthermus	Hyperthermus_butylicus	GCA_000015145	Desulfurococcales|TACK|Crenarchaeota|Thermoprotei|Desulfurococcales|Pyrodictiaceae|Hyperthermus|Hyperthermus_butylicus|GCA_000015145	Desulfurococcales|TACK|Crenarchaeota|Thermoprotei|Desulfurococcales|Pyrodictiaceae|Hyperthermus|Hyperthermus_butylicus|GCA_000015145
GCA_001462395.1	Desulfurococcales	Desulfurococcales	Thermoprotei	Desulfurococcales	Archaea	TACK	Crenarchaeota	Thermoprotei	Desulfurococcales	Pyrodictiaceae	Pyrodictium	Pyrodictium_occultum	GCA_001462395	Desulfurococcales|TACK|Crenarchaeota|Thermoprotei|Desulfurococcales|Pyrodictiaceae|Pyrodictium|Pyrodictium_occultum|GCA_001462395	Desulfurococcales|TACK|Crenarchaeota|Thermoprotei|Desulfurococcales|Pyrodictiaceae|Pyrodictium|Pyrodictium_occultum|GCA_001462395
GCA_000223395.1	Desulfurococcales	Desulfurococcales	Thermoprotei	Desulfurococcales	Archaea	TACK	Crenarchaeota	Thermoprotei	Desulfurococcales	Pyrodictiaceae	Pyrolobus	Pyrolobus_fumarii	GCA_000223395	Desulfurococcales|TACK|Crenarchaeota|Thermoprotei|Desulfurococcales|Pyrodictiaceae|Pyrolobus|Pyrolobus_fumarii|GCA_000223395	Desulfurococcales|TACK|Crenarchaeota|Thermoprotei|Desulfurococcales|Pyrodictiaceae|Pyrolobus|Pyrolobus_fumarii|GCA_000223395
GCA_000389735.1	Sulfolobales	Sulfolobales	Thermoprotei	Sulfolobales	Archaea	TACK	Crenarchaeota	Thermoprotei	Sulfolobales	none	none	Sulfolobales_archaeon_Acd1	GCA_000389735	Sulfolobales|TACK|Crenarchaeota|Thermoprotei|Sulfolobales|none|none|Sulfolobales_archaeon_Acd1|GCA_000389735	Sulfolobales|TACK|Crenarchaeota|Thermoprotei|Sulfolobales|none|none|Sulfolobales_archaeon_Acd1|GCA_000389735
GCA_000213215.1	Sulfolobales	Sulfolobales	Thermoprotei	Sulfolobales	Archaea	TACK	Crenarchaeota	Thermoprotei	Sulfolobales	Sulfolobaceae	Acidianus	Acidianus_hospitalis	GCA_000213215	Sulfolobales|TACK|Crenarchaeota|Thermoprotei|Sulfolobales|Sulfolobaceae|Acidianus|Acidianus_hospitalis|GCA_000213215	Sulfolobales|TACK|Crenarchaeota|Thermoprotei|Sulfolobales|Sulfolobaceae|Acidianus|Acidianus_hospitalis|GCA_000213215
GCA_003201765.1	Sulfolobales	Sulfolobales	Thermoprotei	Sulfolobales	Archaea	TACK	Crenarchaeota	Thermoprotei	Sulfolobales	Sulfolobaceae	Acidianus	Acidianus_sulfidivorans	GCA_003201765	Sulfolobales|TACK|Crenarchaeota|Thermoprotei|Sulfolobales|Sulfolobaceae|Acidianus|Acidianus_sulfidivorans|GCA_003201765	Sulfolobales|TACK|Crenarchaeota|Thermoprotei|Sulfolobales|Sulfolobaceae|Acidianus|Acidianus_sulfidivorans|GCA_003201765
GCA_000016605.1	Sulfolobales	Sulfolobales	Thermoprotei	Sulfolobales	Archaea	TACK	Crenarchaeota	Thermoprotei	Sulfolobales	Sulfolobaceae	Metallosphaera	Metallosphaera_sedula	GCA_000016605	Sulfolobales|TACK|Crenarchaeota|Thermoprotei|Sulfolobales|Sulfolobaceae|Metallosphaera|Metallosphaera_sedula|GCA_000016605	Sulfolobales|TACK|Crenarchaeota|Thermoprotei|Sulfolobales|Sulfolobaceae|Metallosphaera|Metallosphaera_sedula|GCA_000016605
GCA_003852135.1	Sulfolobales	Sulfolobales	Thermoprotei	Sulfolobales	Archaea	TACK	Crenarchaeota	Thermoprotei	Sulfolobales	Sulfolobaceae	Saccharolobus	Saccharolobus_solfataricus	GCA_003852135	Sulfolobales|TACK|Crenarchaeota|Thermoprotei|Sulfolobales|Sulfolobaceae|Saccharolobus|Saccharolobus_solfataricus|GCA_003852135	Sulfolobales|TACK|Crenarchaeota|Thermoprotei|Sulfolobales|Sulfolobaceae|Saccharolobus|Saccharolobus_solfataricus|GCA_003852135
GCA_000012285.1	Sulfolobales	Sulfolobales	Thermoprotei	Sulfolobales	Archaea	TACK	Crenarchaeota	Thermoprotei	Sulfolobales	Sulfolobaceae	Sulfolobus	Sulfolobus_acidocaldarius	GCA_000012285	Sulfolobales|TACK|Crenarchaeota|Thermoprotei|Sulfolobales|Sulfolobaceae|Sulfolobus|Sulfolobus_acidocaldarius|GCA_000012285	Sulfolobales|TACK|Crenarchaeota|Thermoprotei|Sulfolobales|Sulfolobaceae|Sulfolobus|Sulfolobus_acidocaldarius|GCA_000012285
GCA_003086455.1	Sulfolobales	Sulfolobales	Thermoprotei	Sulfolobales	Archaea	TACK	Crenarchaeota	Thermoprotei	Sulfolobales	Sulfolobaceae	Sulfolobus	Sulfolobus_islandicus	GCA_003086455	Sulfolobales|TACK|Crenarchaeota|Thermoprotei|Sulfolobales|Sulfolobaceae|Sulfolobus|Sulfolobus_islandicus|GCA_003086455	Sulfolobales|TACK|Crenarchaeota|Thermoprotei|Sulfolobales|Sulfolobaceae|Sulfolobus|Sulfolobus_islandicus|GCA_003086455
GCA_003056265.1	Sulfolobales	Sulfolobales	Thermoprotei	Sulfolobales	Archaea	TACK	Crenarchaeota	Thermoprotei	Sulfolobales	Sulfolobaceae	Zestosphaera	Zestosphaera_tikiterensis	GCA_003056265	Sulfolobales|TACK|Crenarchaeota|Thermoprotei|Sulfolobales|Sulfolobaceae|Zestosphaera|Zestosphaera_tikiterensis|GCA_003056265	Sulfolobales|TACK|Crenarchaeota|Thermoprotei|Sulfolobales|Sulfolobaceae|Zestosphaera|Zestosphaera_tikiterensis|GCA_003056265
GCA_002507085.1	Marsarchaeota	Marsarchaeota	none	Marsarchaeota	Archaea	TACK	Marsarchaeota	none	none	none	none	archaeon_UBA168	GCA_002507085	Marsarchaeota|TACK|Marsarchaeota|none|none|none|none|archaeon_UBA168|GCA_002507085	Marsarchaeota|TACK|Marsarchaeota|none|none|none|none|archaeon_UBA168|GCA_002507085
GCA_003019445.1	Marsarchaeota	Marsarchaeota	none	Marsarchaeota	Archaea	TACK	Marsarchaeota	none	none	none	none	Candidatus_Marsarchaeota_G1_archaeon_OSP_B	GCA_003019445	Marsarchaeota|TACK|Marsarchaeota|none|none|none|none|Candidatus_Marsarchaeota_G1_archaeon_OSP_B|GCA_003019445	Marsarchaeota|TACK|Marsarchaeota|none|none|none|none|Candidatus_Marsarchaeota_G1_archaeon_OSP_B|GCA_003019445
GCA_003019535.1	Marsarchaeota	Marsarchaeota	none	Marsarchaeota	Archaea	TACK	Marsarchaeota	none	none	none	none	Candidatus_Marsarchaeota_G2_archaeon_ECH_B_1	GCA_003019535	Marsarchaeota|TACK|Marsarchaeota|none|none|none|none|Candidatus_Marsarchaeota_G2_archaeon_ECH_B_1|GCA_003019535	Marsarchaeota|TACK|Marsarchaeota|none|none|none|none|Candidatus_Marsarchaeota_G2_archaeon_ECH_B_1|GCA_003019535
GCA_900248165.1	Thaumarchaeota	Thaumarchaeota	Nitrososphaeria	Thaumarchaeota	Archaea	TACK	Thaumarchaeota	Nitrososphaeria	Nitrosocaldales	Nitrosocaldaceae	Candidatus_Nitrosocaldus	Candidatus_Nitrosocaldus_cavascurensis	GCA_900248165	Thaumarchaeota|TACK|Thaumarchaeota|Nitrososphaeria|Nitrosocaldales|Nitrosocaldaceae|Candidatus_Nitrosocaldus|Candidatus_Nitrosocaldus_cavascurensis|GCA_900248165	Thaumarchaeota|TACK|Thaumarchaeota|Nitrososphaeria|Nitrosocaldales|Nitrosocaldaceae|Candidatus_Nitrosocaldus|Candidatus_Nitrosocaldus_cavascurensis|GCA_900248165
GCA_000802205.2	Thaumarchaeota	Thaumarchaeota	Nitrososphaeria	Thaumarchaeota	Archaea	TACK	Thaumarchaeota	Nitrososphaeria	Nitrososphaerales	Nitrososphaeraceae	Candidatus_Nitrosocosmicus	Candidatus_Nitrosocosmicus_oleophilus	GCA_000802205	Thaumarchaeota|TACK|Thaumarchaeota|Nitrososphaeria|Nitrososphaerales|Nitrososphaeraceae|Candidatus_Nitrosocosmicus|Candidatus_Nitrosocosmicus_oleophilus|GCA_000802205	Thaumarchaeota|TACK|Thaumarchaeota|Nitrososphaeria|Nitrososphaerales|Nitrososphaeraceae|Candidatus_Nitrosocosmicus|Candidatus_Nitrosocosmicus_oleophilus|GCA_000802205
GCA_000303155.1	Thaumarchaeota	Thaumarchaeota	Nitrososphaeria	Thaumarchaeota	Archaea	TACK	Thaumarchaeota	Nitrososphaeria	Nitrososphaerales	Nitrososphaeraceae	Nitrososphaera	Candidatus_Nitrososphaera_gargensis	GCA_000303155	Thaumarchaeota|TACK|Thaumarchaeota|Nitrososphaeria|Nitrososphaerales|Nitrososphaeraceae|Nitrososphaera|Candidatus_Nitrososphaera_gargensis|GCA_000303155	Thaumarchaeota|TACK|Thaumarchaeota|Nitrososphaeria|Nitrososphaerales|Nitrososphaeraceae|Nitrososphaera|Candidatus_Nitrososphaera_gargensis|GCA_000303155
GCA_000698785.1	Thaumarchaeota	Thaumarchaeota	Nitrososphaeria	Thaumarchaeota	Archaea	TACK	Thaumarchaeota	Nitrososphaeria	Nitrososphaerales	Nitrososphaeraceae	Nitrososphaera	Nitrososphaera_viennensis	GCA_000698785	Thaumarchaeota|TACK|Thaumarchaeota|Nitrososphaeria|Nitrososphaerales|Nitrososphaeraceae|Nitrososphaera|Nitrososphaera_viennensis|GCA_000698785	Thaumarchaeota|TACK|Thaumarchaeota|Nitrososphaeria|Nitrososphaerales|Nitrososphaeraceae|Nitrososphaera|Nitrososphaera_viennensis|GCA_000698785
GCA_000200715.1	Thaumarchaeota	Thaumarchaeota	none	Thaumarchaeota	Archaea	TACK	Thaumarchaeota	none	Cenarchaeales	Cenarchaeaceae	Cenarchaeum	Cenarchaeum_symbiosum	GCA_000200715	Thaumarchaeota|TACK|Thaumarchaeota|none|Cenarchaeales|Cenarchaeaceae|Cenarchaeum|Cenarchaeum_symbiosum|GCA_000200715	Thaumarchaeota|TACK|Thaumarchaeota|none|Cenarchaeales|Cenarchaeaceae|Cenarchaeum|Cenarchaeum_symbiosum|GCA_000200715
GCA_003702465.1	Thaumarchaeota	Thaumarchaeota	none	Thaumarchaeota	Archaea	TACK	Thaumarchaeota	none	Nitrosopumilales	Nitrosopumilaceae	Candidatus_Nitrosomarinus	Candidatus_Nitrosomarinus_sp_	GCA_003702465	Thaumarchaeota|TACK|Thaumarchaeota|none|Nitrosopumilales|Nitrosopumilaceae|Candidatus_Nitrosomarinus|Candidatus_Nitrosomarinus_sp_|GCA_003702465	Thaumarchaeota|TACK|Thaumarchaeota|none|Nitrosopumilales|Nitrosopumilaceae|Candidatus_Nitrosomarinus|Candidatus_Nitrosomarinus_sp_|GCA_003702465
GCA_000220175.2	Thaumarchaeota	Thaumarchaeota	none	Thaumarchaeota	Archaea	TACK	Thaumarchaeota	none	Nitrosopumilales	Nitrosopumilaceae	Nitrosarchaeum	Nitrosarchaeum_koreense	GCA_000220175	Thaumarchaeota|TACK|Thaumarchaeota|none|Nitrosopumilales|Nitrosopumilaceae|Nitrosarchaeum|Nitrosarchaeum_koreense|GCA_000220175	Thaumarchaeota|TACK|Thaumarchaeota|none|Nitrosopumilales|Nitrosopumilaceae|Nitrosarchaeum|Nitrosarchaeum_koreense|GCA_000220175
GCA_000018465.1	Thaumarchaeota	Thaumarchaeota	none	Thaumarchaeota	Archaea	TACK	Thaumarchaeota	none	Nitrosopumilales	Nitrosopumilaceae	Nitrosopumilus	Nitrosopumilus_maritimus	GCA_000018465	Thaumarchaeota|TACK|Thaumarchaeota|none|Nitrosopumilales|Nitrosopumilaceae|Nitrosopumilus|Nitrosopumilus_maritimus|GCA_000018465	Thaumarchaeota|TACK|Thaumarchaeota|none|Nitrosopumilales|Nitrosopumilaceae|Nitrosopumilus|Nitrosopumilus_maritimus|GCA_000018465
GCA_900620265.1	Thaumarchaeota	Thaumarchaeota	none	Thaumarchaeota	Archaea	TACK	Thaumarchaeota	none	Nitrosopumilales	Nitrosopumilaceae	none	Nitrosopumilaceae_archaeon	GCA_900620265	Thaumarchaeota|TACK|Thaumarchaeota|none|Nitrosopumilales|Nitrosopumilaceae|none|Nitrosopumilaceae_archaeon|GCA_900620265	Thaumarchaeota|TACK|Thaumarchaeota|none|Nitrosopumilales|Nitrosopumilaceae|none|Nitrosopumilaceae_archaeon|GCA_900620265
GCA_000812185.1	Thaumarchaeota	Thaumarchaeota	none	Thaumarchaeota	Archaea	TACK	Thaumarchaeota	none	none	none	Candidatus_Nitrosopelagicus	Candidatus_Nitrosopelagicus_brevis	GCA_000812185	Thaumarchaeota|TACK|Thaumarchaeota|none|none|none|Candidatus_Nitrosopelagicus|Candidatus_Nitrosopelagicus_brevis|GCA_000812185	Thaumarchaeota|TACK|Thaumarchaeota|none|none|none|Candidatus_Nitrosopelagicus|Candidatus_Nitrosopelagicus_brevis|GCA_000812185
GCA_900065925.1	Thaumarchaeota	Thaumarchaeota	none	Thaumarchaeota	Archaea	TACK	Thaumarchaeota	none	none	none	Candidatus_Nitrosotalea	Candidatus_Nitrosotalea_devanaterra	GCA_900065925	Thaumarchaeota|TACK|Thaumarchaeota|none|none|none|Candidatus_Nitrosotalea|Candidatus_Nitrosotalea_devanaterra|GCA_900065925	Thaumarchaeota|TACK|Thaumarchaeota|none|none|none|Candidatus_Nitrosotalea|Candidatus_Nitrosotalea_devanaterra|GCA_900065925
GCA_002787055.1	Thaumarchaeota	Thaumarchaeota	none	Thaumarchaeota	Archaea	TACK	Thaumarchaeota	none	none	none	Candidatus_Nitrosotenuis	Candidatus_Nitrosotenuis_aquarius	GCA_002787055	Thaumarchaeota|TACK|Thaumarchaeota|none|none|none|Candidatus_Nitrosotenuis|Candidatus_Nitrosotenuis_aquarius|GCA_002787055	Thaumarchaeota|TACK|Thaumarchaeota|none|none|none|Candidatus_Nitrosotenuis|Candidatus_Nitrosotenuis_aquarius|GCA_002787055
GCA_001830115.1	Thaumarchaeota	Thaumarchaeota	none	Thaumarchaeota	Archaea	TACK	Thaumarchaeota	none	none	none	none	Thaumarchaeota_archaeon_RBG_16_49_8	GCA_001830115	Thaumarchaeota|TACK|Thaumarchaeota|none|none|none|none|Thaumarchaeota_archaeon_RBG_16_49_8|GCA_001830115	Thaumarchaeota|TACK|Thaumarchaeota|none|none|none|none|Thaumarchaeota_archaeon_RBG_16_49_8|GCA_001830115
B21_G17	Geothermarchaeota	Geothermarchaeota	none	Geothermarchaeota	Archaea	TACK	Geothermarchaeota	none	none	none	Candidatus_Geothermarchaeota	Candidatus_Geothermarchaeota_archaeon_B21_G17	B21_G17	Geothermarchaeota|TACK|Geothermarchaeota|none|none|none|Candidatus_Geothermarchaeota|Candidatus_Geothermarchaeota_archaeon_B21_G17|B21_G17	Geothermarchaeota|TACK|Geothermarchaeota|none|none|none|Candidatus_Geothermarchaeota|Candidatus_Geothermarchaeota_archaeon_B21_G17|B21_G17
GCA_002011075.1	Geothermarchaeota	Geothermarchaeota	none	Geothermarchaeota	Archaea	TACK	Geothermarchaeota	none	none	none	none	Candidatus_Geothermarchaeota_archaeon_JdFR-13	GCA_002011075	Geothermarchaeota|TACK|Geothermarchaeota|none|none|none|none|Candidatus_Geothermarchaeota_archaeon_JdFR-13|GCA_002011075	Geothermarchaeota|TACK|Geothermarchaeota|none|none|none|none|Candidatus_Geothermarchaeota_archaeon_JdFR-13|GCA_002011075
GCA_000270325.1	Aigarchaeota	Aigarchaeota	none	Aigarchaeota	Archaea	TACK	Aigarchaeota	none	none	none	Candidatus_Caldiarchaeum	Candidatus_Caldiarchaeum_subterraneum	GCA_000270325	Aigarchaeota|TACK|Aigarchaeota|none|none|none|Candidatus_Caldiarchaeum|Candidatus_Caldiarchaeum_subterraneum|GCA_000270325	Aigarchaeota|TACK|Aigarchaeota|none|none|none|Candidatus_Caldiarchaeum|Candidatus_Caldiarchaeum_subterraneum|GCA_000270325
GCA_000405685.1	Aigarchaeota	Aigarchaeota	none	Aigarchaeota	Archaea	TACK	Aigarchaeota	none	none	none	none	Aigarchaeota_archaeon_JGI_0000106-J15	GCA_000405685	Aigarchaeota|TACK|Aigarchaeota|none|none|none|none|Aigarchaeota_archaeon_JGI_0000106-J15|GCA_000405685	Aigarchaeota|TACK|Aigarchaeota|none|none|none|none|Aigarchaeota_archaeon_JGI_0000106-J15|GCA_000405685
GCA_003056285.1	Aigarchaeota	Aigarchaeota	none	Aigarchaeota	Archaea	TACK	Aigarchaeota	none	none	none	none	Aigarchaeota_archaeon_NZ13_MG1	GCA_003056285	Aigarchaeota|TACK|Aigarchaeota|none|none|none|none|Aigarchaeota_archaeon_NZ13_MG1|GCA_003056285	Aigarchaeota|TACK|Aigarchaeota|none|none|none|none|Aigarchaeota_archaeon_NZ13_MG1|GCA_003056285
GCA_000405905.1	Aigarchaeota	Aigarchaeota	none	Aigarchaeota	Archaea	TACK	Aigarchaeota	none	none	none	none	Aigarchaeota_archaeon_SCGC_AAA471-F17	GCA_000405905	Aigarchaeota|TACK|Aigarchaeota|none|none|none|none|Aigarchaeota_archaeon_SCGC_AAA471-F17|GCA_000405905	Aigarchaeota|TACK|Aigarchaeota|none|none|none|none|Aigarchaeota_archaeon_SCGC_AAA471-F17|GCA_000405905
GCA_003660725.1	Aigarchaeota	Aigarchaeota	none	Aigarchaeota	Archaea	TACK	Aigarchaeota	none	none	none	none	Thaumarchaeota_archaeon	GCA_003660725	Aigarchaeota|TACK|Aigarchaeota|none|none|none|none|Thaumarchaeota_archaeon|GCA_003660725	Aigarchaeota|TACK|Aigarchaeota|none|none|none|none|Thaumarchaeota_archaeon|GCA_003660725
GCA_003601605.1	Bathyarchaeota	Bathyarchaeota	none	Bathyarchaeota	Archaea	TACk	Bathyarchaeota	none	none	none	none	Candidatus_Bathyarchaeota_archaeon	GCA_003601605	Bathyarchaeota|TACk|Bathyarchaeota|none|none|none|none|Candidatus_Bathyarchaeota_archaeon|GCA_003601605	Bathyarchaeota|TACk|Bathyarchaeota|none|none|none|none|Candidatus_Bathyarchaeota_archaeon|GCA_003601605
GCA_003604315.1	Bathyarchaeota	Bathyarchaeota	none	Bathyarchaeota	Archaea	TACk	Bathyarchaeota	none	none	none	none	Candidatus_Bathyarchaeota_archaeon	GCA_003604315	Bathyarchaeota|TACk|Bathyarchaeota|none|none|none|none|Candidatus_Bathyarchaeota_archaeon|GCA_003604315	Bathyarchaeota|TACk|Bathyarchaeota|none|none|none|none|Candidatus_Bathyarchaeota_archaeon|GCA_003604315
GCA_003662455.1	Bathyarchaeota	Bathyarchaeota	none	Bathyarchaeota	Archaea	TACk	Bathyarchaeota	none	none	none	none	Candidatus_Bathyarchaeota_archaeon	GCA_003662455	Bathyarchaeota|TACk|Bathyarchaeota|none|none|none|none|Candidatus_Bathyarchaeota_archaeon|GCA_003662455	Bathyarchaeota|TACk|Bathyarchaeota|none|none|none|none|Candidatus_Bathyarchaeota_archaeon|GCA_003662455
GCA_003662715.1	Bathyarchaeota	Bathyarchaeota	none	Bathyarchaeota	Archaea	TACk	Bathyarchaeota	none	none	none	none	Candidatus_Bathyarchaeota_archaeon	GCA_003662715	Bathyarchaeota|TACk|Bathyarchaeota|none|none|none|none|Candidatus_Bathyarchaeota_archaeon|GCA_003662715	Bathyarchaeota|TACk|Bathyarchaeota|none|none|none|none|Candidatus_Bathyarchaeota_archaeon|GCA_003662715
GCA_005888705.1	Bathyarchaeota	Bathyarchaeota	none	Bathyarchaeota	Archaea	TACk	Bathyarchaeota	none	none	none	none	Candidatus_Bathyarchaeota_archaeon	GCA_005888705	Bathyarchaeota|TACk|Bathyarchaeota|none|none|none|none|Candidatus_Bathyarchaeota_archaeon|GCA_005888705	Bathyarchaeota|TACk|Bathyarchaeota|none|none|none|none|Candidatus_Bathyarchaeota_archaeon|GCA_005888705
GCA_005888735.1	Bathyarchaeota	Bathyarchaeota	none	Bathyarchaeota	Archaea	TACk	Bathyarchaeota	none	none	none	none	Candidatus_Bathyarchaeota_archaeon	GCA_005888735	Bathyarchaeota|TACk|Bathyarchaeota|none|none|none|none|Candidatus_Bathyarchaeota_archaeon|GCA_005888735	Bathyarchaeota|TACk|Bathyarchaeota|none|none|none|none|Candidatus_Bathyarchaeota_archaeon|GCA_005888735
GCA_007049995.1	Bathyarchaeota	Bathyarchaeota	none	Bathyarchaeota	Archaea	TACk	Bathyarchaeota	none	none	none	none	Candidatus_Bathyarchaeota_archaeon	GCA_007049995	Bathyarchaeota|TACk|Bathyarchaeota|none|none|none|none|Candidatus_Bathyarchaeota_archaeon|GCA_007049995	Bathyarchaeota|TACk|Bathyarchaeota|none|none|none|none|Candidatus_Bathyarchaeota_archaeon|GCA_007049995
GCA_002490245.1	Bathyarchaeota	Bathyarchaeota	none	Bathyarchaeota	Archaea	TACk	Bathyarchaeota	none	none	none	none	Candidatus_Bathyarchaeota_archaeon_B24-2	GCA_002490245	Bathyarchaeota|TACk|Bathyarchaeota|none|none|none|none|Candidatus_Bathyarchaeota_archaeon_B24-2|GCA_002490245	Bathyarchaeota|TACk|Bathyarchaeota|none|none|none|none|Candidatus_Bathyarchaeota_archaeon_B24-2|GCA_002490245
GCA_001399795.1	Bathyarchaeota	Bathyarchaeota	none	Bathyarchaeota	Archaea	TACk	Bathyarchaeota	none	none	none	none	Candidatus_Bathyarchaeota_archaeon_BA2	GCA_001399795	Bathyarchaeota|TACk|Bathyarchaeota|none|none|none|none|Candidatus_Bathyarchaeota_archaeon_BA2|GCA_001399795	Bathyarchaeota|TACk|Bathyarchaeota|none|none|none|none|Candidatus_Bathyarchaeota_archaeon_BA2|GCA_001399795
GCA_001775965.1	Bathyarchaeota	Bathyarchaeota	none	Bathyarchaeota	Archaea	TACk	Bathyarchaeota	none	none	none	none	Candidatus_Bathyarchaeota_archaeon_RBG_13_60_20	GCA_001775965	Bathyarchaeota|TACk|Bathyarchaeota|none|none|none|none|Candidatus_Bathyarchaeota_archaeon_RBG_13_60_20|GCA_001775965	Bathyarchaeota|TACk|Bathyarchaeota|none|none|none|none|Candidatus_Bathyarchaeota_archaeon_RBG_13_60_20|GCA_001775965
GCA_001775995.1	Bathyarchaeota	Bathyarchaeota	none	Bathyarchaeota	Archaea	TACk	Bathyarchaeota	none	none	none	none	Candidatus_Bathyarchaeota_archaeon_RBG_16_48_13	GCA_001775995	Bathyarchaeota|TACk|Bathyarchaeota|none|none|none|none|Candidatus_Bathyarchaeota_archaeon_RBG_16_48_13|GCA_001775995	Bathyarchaeota|TACk|Bathyarchaeota|none|none|none|none|Candidatus_Bathyarchaeota_archaeon_RBG_16_48_13|GCA_001775995
GCA_000019605.1	Korarchaeota	Korarchaeota	none	Korarchaeota	Archaea	TACK	Korarchaeota	none	none	none	Candidatus_Korarchaeum	Candidatus_Korarchaeum_cryptofilum	GCA_000019605	Korarchaeota|TACK|Korarchaeota|none|none|none|Candidatus_Korarchaeum|Candidatus_Korarchaeum_cryptofilum|GCA_000019605	Korarchaeota|TACK|Korarchaeota|none|none|none|Candidatus_Korarchaeum|Candidatus_Korarchaeum_cryptofilum|GCA_000019605
GCA_003947435.1	Korarchaeota	Korarchaeota	none	Korarchaeota	Archaea	TACK	Korarchaeota	none	none	none	Candidatus_Methanodesulfokores	Candidatus_Methanodesulfokores_washburnensis	GCA_003947435	Korarchaeota|TACK|Korarchaeota|none|none|none|Candidatus_Methanodesulfokores|Candidatus_Methanodesulfokores_washburnensis|GCA_003947435	Korarchaeota|TACK|Korarchaeota|none|none|none|Candidatus_Methanodesulfokores|Candidatus_Methanodesulfokores_washburnensis|GCA_003947435
GCA_003661285.1	Korarchaeota	Korarchaeota	none	Korarchaeota	Archaea	TACK	Korarchaeota	none	none	none	none	Candidatus_Korarchaeota_archaeon	GCA_003661285	Korarchaeota|TACK|Korarchaeota|none|none|none|none|Candidatus_Korarchaeota_archaeon|GCA_003661285	Korarchaeota|TACK|Korarchaeota|none|none|none|none|Candidatus_Korarchaeota_archaeon|GCA_003661285
GCA_003661365.1	Korarchaeota	Korarchaeota	none	Korarchaeota	Archaea	TACK	Korarchaeota	none	none	none	none	Candidatus_Korarchaeota_archaeon	GCA_003661365	Korarchaeota|TACK|Korarchaeota|none|none|none|none|Candidatus_Korarchaeota_archaeon|GCA_003661365	Korarchaeota|TACK|Korarchaeota|none|none|none|none|Candidatus_Korarchaeota_archaeon|GCA_003661365
GCA_003661385.1	Korarchaeota	Korarchaeota	none	Korarchaeota	Archaea	TACK	Korarchaeota	none	none	none	none	Candidatus_Korarchaeota_archaeon	GCA_003661385	Korarchaeota|TACK|Korarchaeota|none|none|none|none|Candidatus_Korarchaeota_archaeon|GCA_003661385	Korarchaeota|TACK|Korarchaeota|none|none|none|none|Candidatus_Korarchaeota_archaeon|GCA_003661385
GCA_003344655.1	Korarchaeota	Korarchaeota	none	Korarchaeota	Archaea	TACK	Korarchaeota	none	none	none	none	Candidatus_Korarchaeota_archaeon_NZ13-K	GCA_003344655	Korarchaeota|TACK|Korarchaeota|none|none|none|none|Candidatus_Korarchaeota_archaeon_NZ13-K|GCA_003344655	Korarchaeota|TACK|Korarchaeota|none|none|none|none|Candidatus_Korarchaeota_archaeon_NZ13-K|GCA_003344655
GCA_004376705.1	Lokiarchaeota	Lokiarchaeota	none	Lokiarchaeota	Archaea	Asgard	Lokiarchaeota	none	none	none	none	Candidatus_Lokiarchaeota_archaeon	GCA_004376705	Lokiarchaeota|Asgard|Lokiarchaeota|none|none|none|none|Candidatus_Lokiarchaeota_archaeon|GCA_004376705	Lokiarchaeota|Asgard|Lokiarchaeota|none|none|none|none|Candidatus_Lokiarchaeota_archaeon|GCA_004376705
GCA_004524425.1	Lokiarchaeota	Lokiarchaeota	none	Lokiarchaeota	Archaea	Asgard	Lokiarchaeota	none	none	none	none	Candidatus_Lokiarchaeota_archaeon	GCA_004524425	Lokiarchaeota|Asgard|Lokiarchaeota|none|none|none|none|Candidatus_Lokiarchaeota_archaeon|GCA_004524425	Lokiarchaeota|Asgard|Lokiarchaeota|none|none|none|none|Candidatus_Lokiarchaeota_archaeon|GCA_004524425
GCA_004524545.1	Lokiarchaeota	Lokiarchaeota	none	Lokiarchaeota	Archaea	Asgard	Lokiarchaeota	none	none	none	none	Candidatus_Lokiarchaeota_archaeon	GCA_004524545	Lokiarchaeota|Asgard|Lokiarchaeota|none|none|none|none|Candidatus_Lokiarchaeota_archaeon|GCA_004524545	Lokiarchaeota|Asgard|Lokiarchaeota|none|none|none|none|Candidatus_Lokiarchaeota_archaeon|GCA_004524545
GCA_004524725.1	Lokiarchaeota	Lokiarchaeota	none	Lokiarchaeota	Archaea	Asgard	Lokiarchaeota	none	none	none	none	Candidatus_Lokiarchaeota_archaeon	GCA_004524725	Lokiarchaeota|Asgard|Lokiarchaeota|none|none|none|none|Candidatus_Lokiarchaeota_archaeon|GCA_004524725	Lokiarchaeota|Asgard|Lokiarchaeota|none|none|none|none|Candidatus_Lokiarchaeota_archaeon|GCA_004524725
GCA_001940655.1	Lokiarchaeota	Lokiarchaeota	none	Lokiarchaeota	Archaea	Asgard	Lokiarchaeota	none	none	none	none	Candidatus_Lokiarchaeota_archaeon_CR_4	GCA_001940655	Lokiarchaeota|Asgard|Lokiarchaeota|none|none|none|none|Candidatus_Lokiarchaeota_archaeon_CR_4|GCA_001940655	Lokiarchaeota|Asgard|Lokiarchaeota|none|none|none|none|Candidatus_Lokiarchaeota_archaeon_CR_4|GCA_001940655
GCA_005191415.1	Helarchaeota	Helarchaeota	none	Helarchaeota	Archaea	Asgard	Helarchaeota	none	none	none	none	Candidatus_Helarchaeota_ASGARD_archaeon_Hel_GB_A	GCA_005191415	Helarchaeota|Asgard|Helarchaeota|none|none|none|none|Candidatus_Helarchaeota_ASGARD_archaeon_Hel_GB_A|GCA_005191415	Helarchaeota|Asgard|Helarchaeota|none|none|none|none|Candidatus_Helarchaeota_ASGARD_archaeon_Hel_GB_A|GCA_005191415
GCA_005191425.1	Helarchaeota	Helarchaeota	none	Helarchaeota	Archaea	Asgard	Helarchaeota	none	none	none	none	Candidatus_Helarchaeota_ASGARD_archaeon_Hel_GB_B	GCA_005191425	Helarchaeota|Asgard|Helarchaeota|none|none|none|none|Candidatus_Helarchaeota_ASGARD_archaeon_Hel_GB_B|GCA_005191425	Helarchaeota|Asgard|Helarchaeota|none|none|none|none|Candidatus_Helarchaeota_ASGARD_archaeon_Hel_GB_B|GCA_005191425
GCA_001940665.1	Odinarchaeota	Odinarchaeota	none	Odinarchaeota	Archaea	Asgard	Odinarchaeota	none	none	none	none	Candidatus_Odinarchaeota_archaeon_LCB_4	GCA_001940665	Odinarchaeota|Asgard|Odinarchaeota|none|none|none|none|Candidatus_Odinarchaeota_archaeon_LCB_4|GCA_001940665	Odinarchaeota|Asgard|Odinarchaeota|none|none|none|none|Candidatus_Odinarchaeota_archaeon_LCB_4|GCA_001940665
GCA_004524435.1	Thorarchaeota	Thorarchaeota	none	Thorarchaeota	Archaea	Asgard	Thorarchaeota	none	none	none	none	Candidatus_Thorarchaeota_archaeon	GCA_004524435	Thorarchaeota|Asgard|Thorarchaeota|none|none|none|none|Candidatus_Thorarchaeota_archaeon|GCA_004524435	Thorarchaeota|Asgard|Thorarchaeota|none|none|none|none|Candidatus_Thorarchaeota_archaeon|GCA_004524435
GCA_004524565.1	Thorarchaeota	Thorarchaeota	none	Thorarchaeota	Archaea	Asgard	Thorarchaeota	none	none	none	none	Candidatus_Thorarchaeota_archaeon	GCA_004524565	Thorarchaeota|Asgard|Thorarchaeota|none|none|none|none|Candidatus_Thorarchaeota_archaeon|GCA_004524565	Thorarchaeota|Asgard|Thorarchaeota|none|none|none|none|Candidatus_Thorarchaeota_archaeon|GCA_004524565
GCA_004524595.1	Thorarchaeota	Thorarchaeota	none	Thorarchaeota	Archaea	Asgard	Thorarchaeota	none	none	none	none	Candidatus_Thorarchaeota_archaeon	GCA_004524595	Thorarchaeota|Asgard|Thorarchaeota|none|none|none|none|Candidatus_Thorarchaeota_archaeon|GCA_004524595	Thorarchaeota|Asgard|Thorarchaeota|none|none|none|none|Candidatus_Thorarchaeota_archaeon|GCA_004524595
GCA_001940705.1	Thorarchaeota	Thorarchaeota	none	Thorarchaeota	Archaea	Asgard	Thorarchaeota	none	none	none	none	Candidatus_Thorarchaeota_archaeon_AB_25	GCA_001940705	Thorarchaeota|Asgard|Thorarchaeota|none|none|none|none|Candidatus_Thorarchaeota_archaeon_AB_25|GCA_001940705	Thorarchaeota|Asgard|Thorarchaeota|none|none|none|none|Candidatus_Thorarchaeota_archaeon_AB_25|GCA_001940705
GCA_002825515.1	Thorarchaeota	Thorarchaeota	none	Thorarchaeota	Archaea	Asgard	Thorarchaeota	none	none	none	none	Candidatus_Thorarchaeota_archaeon_MP11T_1	GCA_002825515	Thorarchaeota|Asgard|Thorarchaeota|none|none|none|none|Candidatus_Thorarchaeota_archaeon_MP11T_1|GCA_002825515	Thorarchaeota|Asgard|Thorarchaeota|none|none|none|none|Candidatus_Thorarchaeota_archaeon_MP11T_1|GCA_002825515
GCA_002825535.1	Thorarchaeota	Thorarchaeota	none	Thorarchaeota	Archaea	Asgard	Thorarchaeota	none	none	none	none	Candidatus_Thorarchaeota_archaeon_MP9T_1	GCA_002825535	Thorarchaeota|Asgard|Thorarchaeota|none|none|none|none|Candidatus_Thorarchaeota_archaeon_MP9T_1|GCA_002825535	Thorarchaeota|Asgard|Thorarchaeota|none|none|none|none|Candidatus_Thorarchaeota_archaeon_MP9T_1|GCA_002825535
GCA_002728275.1	Heimdallarchaeota	Heimdallarchaeota	none	Heimdallarchaeota	Archaea	Asgard	Heimdallarchaeota	none	none	none	none	Candidatus_Heimdallarchaeota_archaeon	GCA_002728275	Heimdallarchaeota|Asgard|Heimdallarchaeota|none|none|none|none|Candidatus_Heimdallarchaeota_archaeon|GCA_002728275	Heimdallarchaeota|Asgard|Heimdallarchaeota|none|none|none|none|Candidatus_Heimdallarchaeota_archaeon|GCA_002728275
GCA_003662885.1	Heimdallarchaeota	Heimdallarchaeota	none	Heimdallarchaeota	Archaea	Asgard	Heimdallarchaeota	none	none	none	none	Candidatus_Heimdallarchaeota_archaeon	GCA_003662885	Heimdallarchaeota|Asgard|Heimdallarchaeota|none|none|none|none|Candidatus_Heimdallarchaeota_archaeon|GCA_003662885	Heimdallarchaeota|Asgard|Heimdallarchaeota|none|none|none|none|Candidatus_Heimdallarchaeota_archaeon|GCA_003662885
GCA_001940755.1	Heimdallarchaeota	Heimdallarchaeota	none	Heimdallarchaeota	Archaea	Asgard	Heimdallarchaeota	none	none	none	none	Candidatus_Heimdallarchaeota_archaeon_AB_125	GCA_001940755	Heimdallarchaeota|Asgard|Heimdallarchaeota|none|none|none|none|Candidatus_Heimdallarchaeota_archaeon_AB_125|GCA_001940755	Heimdallarchaeota|Asgard|Heimdallarchaeota|none|none|none|none|Candidatus_Heimdallarchaeota_archaeon_AB_125|GCA_001940755
GCA_003144275.1	Heimdallarchaeota	Heimdallarchaeota	none	Heimdallarchaeota	Archaea	Asgard	Heimdallarchaeota	none	none	none	none	Candidatus_Heimdallarchaeota_archaeon_B3_Heim	GCA_003144275	Heimdallarchaeota|Asgard|Heimdallarchaeota|none|none|none|none|Candidatus_Heimdallarchaeota_archaeon_B3_Heim|GCA_003144275	Heimdallarchaeota|Asgard|Heimdallarchaeota|none|none|none|none|Candidatus_Heimdallarchaeota_archaeon_B3_Heim|GCA_003144275
GCA_001940725.1	Heimdallarchaeota	Heimdallarchaeota	none	Heimdallarchaeota	Archaea	Asgard	Heimdallarchaeota	none	none	none	none	Candidatus_Heimdallarchaeota_archaeon_LC_2	GCA_001940725	Heimdallarchaeota|Asgard|Heimdallarchaeota|none|none|none|none|Candidatus_Heimdallarchaeota_archaeon_LC_2|GCA_001940725	Heimdallarchaeota|Asgard|Heimdallarchaeota|none|none|none|none|Candidatus_Heimdallarchaeota_archaeon_LC_2|GCA_001940725
GCA_001940645.1	Heimdallarchaeota	Heimdallarchaeota	none	Heimdallarchaeota	Archaea	Asgard	Heimdallarchaeota	none	none	none	none	Candidatus_Heimdallarchaeota_archaeon_LC_3	GCA_001940645	Heimdallarchaeota|Asgard|Heimdallarchaeota|none|none|none|none|Candidatus_Heimdallarchaeota_archaeon_LC_3|GCA_001940645	Heimdallarchaeota|Asgard|Heimdallarchaeota|none|none|none|none|Candidatus_Heimdallarchaeota_archaeon_LC_3|GCA_001940645
GCA_000830315.1	Woesearchaeota	Woesearchaeota	none	Woesearchaeota	Archaea	DPANN	Woesearchaeota	none	none	none	none	archaeon_GW2011_AR20	GCA_000830315	Woesearchaeota|DPANN|Woesearchaeota|none|none|none|none|archaeon_GW2011_AR20|GCA_000830315	Woesearchaeota|DPANN|Woesearchaeota|none|none|none|none|archaeon_GW2011_AR20|GCA_000830315
GCA_002686295.1	Woesearchaeota	Woesearchaeota	none	Woesearchaeota	Archaea	DPANN	Woesearchaeota	none	none	none	none	Candidatus_Woesearchaeota_archaeon	GCA_002686295	Woesearchaeota|DPANN|Woesearchaeota|none|none|none|none|Candidatus_Woesearchaeota_archaeon|GCA_002686295	Woesearchaeota|DPANN|Woesearchaeota|none|none|none|none|Candidatus_Woesearchaeota_archaeon|GCA_002686295
GCA_002686855.1	Woesearchaeota	Woesearchaeota	none	Woesearchaeota	Archaea	DPANN	Woesearchaeota	none	none	none	none	Candidatus_Woesearchaeota_archaeon	GCA_002686855	Woesearchaeota|DPANN|Woesearchaeota|none|none|none|none|Candidatus_Woesearchaeota_archaeon|GCA_002686855	Woesearchaeota|DPANN|Woesearchaeota|none|none|none|none|Candidatus_Woesearchaeota_archaeon|GCA_002686855
GCA_002687275.1	Woesearchaeota	Woesearchaeota	none	Woesearchaeota	Archaea	DPANN	Woesearchaeota	none	none	none	none	Candidatus_Woesearchaeota_archaeon	GCA_002687275	Woesearchaeota|DPANN|Woesearchaeota|none|none|none|none|Candidatus_Woesearchaeota_archaeon|GCA_002687275	Woesearchaeota|DPANN|Woesearchaeota|none|none|none|none|Candidatus_Woesearchaeota_archaeon|GCA_002687275
GCA_002687795.1	Woesearchaeota	Woesearchaeota	none	Woesearchaeota	Archaea	DPANN	Woesearchaeota	none	none	none	none	Candidatus_Woesearchaeota_archaeon	GCA_002687795	Woesearchaeota|DPANN|Woesearchaeota|none|none|none|none|Candidatus_Woesearchaeota_archaeon|GCA_002687795	Woesearchaeota|DPANN|Woesearchaeota|none|none|none|none|Candidatus_Woesearchaeota_archaeon|GCA_002687795
GCA_002688315.1	Woesearchaeota	Woesearchaeota	none	Woesearchaeota	Archaea	DPANN	Woesearchaeota	none	none	none	none	Candidatus_Woesearchaeota_archaeon	GCA_002688315	Woesearchaeota|DPANN|Woesearchaeota|none|none|none|none|Candidatus_Woesearchaeota_archaeon|GCA_002688315	Woesearchaeota|DPANN|Woesearchaeota|none|none|none|none|Candidatus_Woesearchaeota_archaeon|GCA_002688315
GCA_002867475.1	Woesearchaeota	Woesearchaeota	none	Woesearchaeota	Archaea	DPANN	Woesearchaeota	none	none	none	none	Candidatus_Woesearchaeota_archaeon	GCA_002867475	Woesearchaeota|DPANN|Woesearchaeota|none|none|none|none|Candidatus_Woesearchaeota_archaeon|GCA_002867475	Woesearchaeota|DPANN|Woesearchaeota|none|none|none|none|Candidatus_Woesearchaeota_archaeon|GCA_002867475
GCA_003560545.1	Woesearchaeota	Woesearchaeota	none	Woesearchaeota	Archaea	DPANN	Woesearchaeota	none	none	none	none	Candidatus_Woesearchaeota_archaeon	GCA_003560545	Woesearchaeota|DPANN|Woesearchaeota|none|none|none|none|Candidatus_Woesearchaeota_archaeon|GCA_003560545	Woesearchaeota|DPANN|Woesearchaeota|none|none|none|none|Candidatus_Woesearchaeota_archaeon|GCA_003560545
GCA_003694495.1	Woesearchaeota	Woesearchaeota	none	Woesearchaeota	Archaea	DPANN	Woesearchaeota	none	none	none	none	Candidatus_Woesearchaeota_archaeon	GCA_003694495	Woesearchaeota|DPANN|Woesearchaeota|none|none|none|none|Candidatus_Woesearchaeota_archaeon|GCA_003694495	Woesearchaeota|DPANN|Woesearchaeota|none|none|none|none|Candidatus_Woesearchaeota_archaeon|GCA_003694495
GCA_003695435.1	Woesearchaeota	Woesearchaeota	none	Woesearchaeota	Archaea	DPANN	Woesearchaeota	none	none	none	none	Candidatus_Woesearchaeota_archaeon	GCA_003695435	Woesearchaeota|DPANN|Woesearchaeota|none|none|none|none|Candidatus_Woesearchaeota_archaeon|GCA_003695435	Woesearchaeota|DPANN|Woesearchaeota|none|none|none|none|Candidatus_Woesearchaeota_archaeon|GCA_003695435
GCA_007116645.1	Woesearchaeota	Woesearchaeota	none	Woesearchaeota	Archaea	DPANN	Woesearchaeota	none	none	none	none	Candidatus_Woesearchaeota_archaeon	GCA_007116645	Woesearchaeota|DPANN|Woesearchaeota|none|none|none|none|Candidatus_Woesearchaeota_archaeon|GCA_007116645	Woesearchaeota|DPANN|Woesearchaeota|none|none|none|none|Candidatus_Woesearchaeota_archaeon|GCA_007116645
GCA_007116655.1	Woesearchaeota	Woesearchaeota	none	Woesearchaeota	Archaea	DPANN	Woesearchaeota	none	none	none	none	Candidatus_Woesearchaeota_archaeon	GCA_007116655	Woesearchaeota|DPANN|Woesearchaeota|none|none|none|none|Candidatus_Woesearchaeota_archaeon|GCA_007116655	Woesearchaeota|DPANN|Woesearchaeota|none|none|none|none|Candidatus_Woesearchaeota_archaeon|GCA_007116655
GCA_007117065.1	Woesearchaeota	Woesearchaeota	none	Woesearchaeota	Archaea	DPANN	Woesearchaeota	none	none	none	none	Candidatus_Woesearchaeota_archaeon	GCA_007117065	Woesearchaeota|DPANN|Woesearchaeota|none|none|none|none|Candidatus_Woesearchaeota_archaeon|GCA_007117065	Woesearchaeota|DPANN|Woesearchaeota|none|none|none|none|Candidatus_Woesearchaeota_archaeon|GCA_007117065
GCA_007131205.1	Woesearchaeota	Woesearchaeota	none	Woesearchaeota	Archaea	DPANN	Woesearchaeota	none	none	none	none	Candidatus_Woesearchaeota_archaeon	GCA_007131205	Woesearchaeota|DPANN|Woesearchaeota|none|none|none|none|Candidatus_Woesearchaeota_archaeon|GCA_007131205	Woesearchaeota|DPANN|Woesearchaeota|none|none|none|none|Candidatus_Woesearchaeota_archaeon|GCA_007131205
GCA_002792115.1	Woesearchaeota	Woesearchaeota	none	Woesearchaeota	Archaea	DPANN	Woesearchaeota	none	none	none	none	Candidatus_Woesearchaeota_archaeon_CG_4_10_14_0_2_um_filter_33_13	GCA_002792115	Woesearchaeota|DPANN|Woesearchaeota|none|none|none|none|Candidatus_Woesearchaeota_archaeon_CG_4_10_14_0_2_um_filter_33_13|GCA_002792115	Woesearchaeota|DPANN|Woesearchaeota|none|none|none|none|Candidatus_Woesearchaeota_archaeon_CG_4_10_14_0_2_um_filter_33_13|GCA_002792115
GCA_001871415.1	Woesearchaeota	Woesearchaeota	none	Woesearchaeota	Archaea	DPANN	Woesearchaeota	none	none	none	none	Candidatus_Woesearchaeota_archaeon_CG1_02_57_44	GCA_001871415	Woesearchaeota|DPANN|Woesearchaeota|none|none|none|none|Candidatus_Woesearchaeota_archaeon_CG1_02_57_44|GCA_001871415	Woesearchaeota|DPANN|Woesearchaeota|none|none|none|none|Candidatus_Woesearchaeota_archaeon_CG1_02_57_44|GCA_001871415
GCA_002762795.1	Woesearchaeota	Woesearchaeota	none	Woesearchaeota	Archaea	DPANN	Woesearchaeota	none	none	none	none	Candidatus_Woesearchaeota_archaeon_CG10_big_fil_rev_8_21_14_0_10_37_12	GCA_002762795	Woesearchaeota|DPANN|Woesearchaeota|none|none|none|none|Candidatus_Woesearchaeota_archaeon_CG10_big_fil_rev_8_21_14_0_10_37_12|GCA_002762795	Woesearchaeota|DPANN|Woesearchaeota|none|none|none|none|Candidatus_Woesearchaeota_archaeon_CG10_big_fil_rev_8_21_14_0_10_37_12|GCA_002762795
GCA_002505945.1	Woesearchaeota	Woesearchaeota	none	Woesearchaeota	Archaea	DPANN	Woesearchaeota	none	none	none	none	Candidatus_Woesearchaeota_archaeon_UBA119	GCA_002505945	Woesearchaeota|DPANN|Woesearchaeota|none|none|none|none|Candidatus_Woesearchaeota_archaeon_UBA119|GCA_002505945	Woesearchaeota|DPANN|Woesearchaeota|none|none|none|none|Candidatus_Woesearchaeota_archaeon_UBA119|GCA_002505945
GCA_002503705.1	Woesearchaeota	Woesearchaeota	none	Woesearchaeota	Archaea	DPANN	Woesearchaeota	none	none	none	none	Candidatus_Woesearchaeota_archaeon_UBA153	GCA_002503705	Woesearchaeota|DPANN|Woesearchaeota|none|none|none|none|Candidatus_Woesearchaeota_archaeon_UBA153|GCA_002503705	Woesearchaeota|DPANN|Woesearchaeota|none|none|none|none|Candidatus_Woesearchaeota_archaeon_UBA153|GCA_002503705
GCA_002505585.1	Woesearchaeota	Woesearchaeota	none	Woesearchaeota	Archaea	DPANN	Woesearchaeota	none	none	none	none	Candidatus_Woesearchaeota_archaeon_UBA489	GCA_002505585	Woesearchaeota|DPANN|Woesearchaeota|none|none|none|none|Candidatus_Woesearchaeota_archaeon_UBA489|GCA_002505585	Woesearchaeota|DPANN|Woesearchaeota|none|none|none|none|Candidatus_Woesearchaeota_archaeon_UBA489|GCA_002505585
GCA_002498125.1	Woesearchaeota	Woesearchaeota	none	Woesearchaeota	Archaea	DPANN	Woesearchaeota	none	none	none	none	Candidatus_Woesearchaeota_archaeon_UBA525	GCA_002498125	Woesearchaeota|DPANN|Woesearchaeota|none|none|none|none|Candidatus_Woesearchaeota_archaeon_UBA525|GCA_002498125	Woesearchaeota|DPANN|Woesearchaeota|none|none|none|none|Candidatus_Woesearchaeota_archaeon_UBA525|GCA_002498125
GCA_002687825.1	Woesearchaeota	Woesearchaeota	none	Woesearchaeota	Archaea	DPANN	Woesearchaeota	none	none	none	none	Nanoarchaeota_archaeon	GCA_002687825	Woesearchaeota|DPANN|Woesearchaeota|none|none|none|none|Nanoarchaeota_archaeon|GCA_002687825	Woesearchaeota|DPANN|Woesearchaeota|none|none|none|none|Nanoarchaeota_archaeon|GCA_002687825
GCA_000402515.1	Woesearchaeota	Woesearchaeota	none	Woesearchaeota	Archaea	DPANN	Woesearchaeota	none	none	none	none	Nanoarchaeota_archaeon_SCGC_AAA011-G17	GCA_000402515	Woesearchaeota|DPANN|Woesearchaeota|none|none|none|none|Nanoarchaeota_archaeon_SCGC_AAA011-G17|GCA_000402515	Woesearchaeota|DPANN|Woesearchaeota|none|none|none|none|Nanoarchaeota_archaeon_SCGC_AAA011-G17|GCA_000402515
GCA_000806055.1	Pacearchaeota	Pacearchaeota	none	Pacearchaeota	Archaea	DPANN	Pacearchaeota	none	none	none	none	archaeon_GW2011_AR1	GCA_000806055	Pacearchaeota|DPANN|Pacearchaeota|none|none|none|none|archaeon_GW2011_AR1|GCA_000806055	Pacearchaeota|DPANN|Pacearchaeota|none|none|none|none|archaeon_GW2011_AR1|GCA_000806055
GCA_000805965.1	Pacearchaeota	Pacearchaeota	none	Pacearchaeota	Archaea	DPANN	Pacearchaeota	none	none	none	none	archaeon_GW2011_AR13	GCA_000805965	Pacearchaeota|DPANN|Pacearchaeota|none|none|none|none|archaeon_GW2011_AR13|GCA_000805965	Pacearchaeota|DPANN|Pacearchaeota|none|none|none|none|archaeon_GW2011_AR13|GCA_000805965
GCA_002686355.1	Pacearchaeota	Pacearchaeota	none	Pacearchaeota	Archaea	DPANN	Pacearchaeota	none	none	none	none	Candidatus_Pacearchaeota_archaeon	GCA_002686355	Pacearchaeota|DPANN|Pacearchaeota|none|none|none|none|Candidatus_Pacearchaeota_archaeon|GCA_002686355	Pacearchaeota|DPANN|Pacearchaeota|none|none|none|none|Candidatus_Pacearchaeota_archaeon|GCA_002686355
GCA_002688415.1	Pacearchaeota	Pacearchaeota	none	Pacearchaeota	Archaea	DPANN	Pacearchaeota	none	none	none	none	Candidatus_Pacearchaeota_archaeon	GCA_002688415	Pacearchaeota|DPANN|Pacearchaeota|none|none|none|none|Candidatus_Pacearchaeota_archaeon|GCA_002688415	Pacearchaeota|DPANN|Pacearchaeota|none|none|none|none|Candidatus_Pacearchaeota_archaeon|GCA_002688415
GCA_002688875.1	Pacearchaeota	Pacearchaeota	none	Pacearchaeota	Archaea	DPANN	Pacearchaeota	none	none	none	none	Candidatus_Pacearchaeota_archaeon	GCA_002688875	Pacearchaeota|DPANN|Pacearchaeota|none|none|none|none|Candidatus_Pacearchaeota_archaeon|GCA_002688875	Pacearchaeota|DPANN|Pacearchaeota|none|none|none|none|Candidatus_Pacearchaeota_archaeon|GCA_002688875
GCA_002689985.1	Pacearchaeota	Pacearchaeota	none	Pacearchaeota	Archaea	DPANN	Pacearchaeota	none	none	none	none	Candidatus_Pacearchaeota_archaeon	GCA_002689985	Pacearchaeota|DPANN|Pacearchaeota|none|none|none|none|Candidatus_Pacearchaeota_archaeon|GCA_002689985	Pacearchaeota|DPANN|Pacearchaeota|none|none|none|none|Candidatus_Pacearchaeota_archaeon|GCA_002689985
GCA_002731115.1	Pacearchaeota	Pacearchaeota	none	Pacearchaeota	Archaea	DPANN	Pacearchaeota	none	none	none	none	Candidatus_Pacearchaeota_archaeon	GCA_002731115	Pacearchaeota|DPANN|Pacearchaeota|none|none|none|none|Candidatus_Pacearchaeota_archaeon|GCA_002731115	Pacearchaeota|DPANN|Pacearchaeota|none|none|none|none|Candidatus_Pacearchaeota_archaeon|GCA_002731115
GCA_002790905.1	Pacearchaeota	Pacearchaeota	none	Pacearchaeota	Archaea	DPANN	Pacearchaeota	none	none	none	none	Candidatus_Pacearchaeota_archaeon_CG_4_9_14_3_um_filter_35_19	GCA_002790905	Pacearchaeota|DPANN|Pacearchaeota|none|none|none|none|Candidatus_Pacearchaeota_archaeon_CG_4_9_14_3_um_filter_35_19|GCA_002790905	Pacearchaeota|DPANN|Pacearchaeota|none|none|none|none|Candidatus_Pacearchaeota_archaeon_CG_4_9_14_3_um_filter_35_19|GCA_002790905
GCA_002780285.1	Pacearchaeota	Pacearchaeota	none	Pacearchaeota	Archaea	DPANN	Pacearchaeota	none	none	none	none	Candidatus_Pacearchaeota_archaeon_CG06_land_8_20_14_3_00_35_12	GCA_002780285	Pacearchaeota|DPANN|Pacearchaeota|none|none|none|none|Candidatus_Pacearchaeota_archaeon_CG06_land_8_20_14_3_00_35_12|GCA_002780285	Pacearchaeota|DPANN|Pacearchaeota|none|none|none|none|Candidatus_Pacearchaeota_archaeon_CG06_land_8_20_14_3_00_35_12|GCA_002780285
GCA_002763155.1	Pacearchaeota	Pacearchaeota	none	Pacearchaeota	Archaea	DPANN	Pacearchaeota	none	none	none	none	Candidatus_Pacearchaeota_archaeon_CG10_big_fil_rev_8_21_14_0_10_30_48	GCA_002763155	Pacearchaeota|DPANN|Pacearchaeota|none|none|none|none|Candidatus_Pacearchaeota_archaeon_CG10_big_fil_rev_8_21_14_0_10_30_48|GCA_002763155	Pacearchaeota|DPANN|Pacearchaeota|none|none|none|none|Candidatus_Pacearchaeota_archaeon_CG10_big_fil_rev_8_21_14_0_10_30_48|GCA_002763155
GCA_002763115.1	Pacearchaeota	Pacearchaeota	none	Pacearchaeota	Archaea	DPANN	Pacearchaeota	none	none	none	none	Candidatus_Pacearchaeota_archaeon_CG10_big_fil_rev_8_21_14_0_10_31_59	GCA_002763115	Pacearchaeota|DPANN|Pacearchaeota|none|none|none|none|Candidatus_Pacearchaeota_archaeon_CG10_big_fil_rev_8_21_14_0_10_31_59|GCA_002763115	Pacearchaeota|DPANN|Pacearchaeota|none|none|none|none|Candidatus_Pacearchaeota_archaeon_CG10_big_fil_rev_8_21_14_0_10_31_59|GCA_002763115
GCA_002763085.1	Pacearchaeota	Pacearchaeota	none	Pacearchaeota	Archaea	DPANN	Pacearchaeota	none	none	none	none	Candidatus_Pacearchaeota_archaeon_CG10_big_fil_rev_8_21_14_0_10_32_14	GCA_002763085	Pacearchaeota|DPANN|Pacearchaeota|none|none|none|none|Candidatus_Pacearchaeota_archaeon_CG10_big_fil_rev_8_21_14_0_10_32_14|GCA_002763085	Pacearchaeota|DPANN|Pacearchaeota|none|none|none|none|Candidatus_Pacearchaeota_archaeon_CG10_big_fil_rev_8_21_14_0_10_32_14|GCA_002763085
GCA_002763075.1	Pacearchaeota	Pacearchaeota	none	Pacearchaeota	Archaea	DPANN	Pacearchaeota	none	none	none	none	Candidatus_Pacearchaeota_archaeon_CG10_big_fil_rev_8_21_14_0_10_34_76	GCA_002763075	Pacearchaeota|DPANN|Pacearchaeota|none|none|none|none|Candidatus_Pacearchaeota_archaeon_CG10_big_fil_rev_8_21_14_0_10_34_76|GCA_002763075	Pacearchaeota|DPANN|Pacearchaeota|none|none|none|none|Candidatus_Pacearchaeota_archaeon_CG10_big_fil_rev_8_21_14_0_10_34_76|GCA_002763075
GCA_002254495.1	Pacearchaeota	Pacearchaeota	none	Pacearchaeota	Archaea	DPANN	Pacearchaeota	none	none	none	none	Candidatus_Pacearchaeota_archaeon_ex4484_26	GCA_002254495	Pacearchaeota|DPANN|Pacearchaeota|none|none|none|none|Candidatus_Pacearchaeota_archaeon_ex4484_26|GCA_002254495	Pacearchaeota|DPANN|Pacearchaeota|none|none|none|none|Candidatus_Pacearchaeota_archaeon_ex4484_26|GCA_002254495
GCA_002254805.1	Pacearchaeota	Pacearchaeota	none	Pacearchaeota	Archaea	DPANN	Pacearchaeota	none	none	none	none	Candidatus_Pacearchaeota_archaeon_ex4484_31	GCA_002254805	Pacearchaeota|DPANN|Pacearchaeota|none|none|none|none|Candidatus_Pacearchaeota_archaeon_ex4484_31|GCA_002254805	Pacearchaeota|DPANN|Pacearchaeota|none|none|none|none|Candidatus_Pacearchaeota_archaeon_ex4484_31|GCA_002254805
GCA_001786415.1	Pacearchaeota	Pacearchaeota	none	Pacearchaeota	Archaea	DPANN	Pacearchaeota	none	none	none	none	Candidatus_Pacearchaeota_archaeon_RBG_19FT_COMBO_34_9	GCA_001786415	Pacearchaeota|DPANN|Pacearchaeota|none|none|none|none|Candidatus_Pacearchaeota_archaeon_RBG_19FT_COMBO_34_9|GCA_001786415	Pacearchaeota|DPANN|Pacearchaeota|none|none|none|none|Candidatus_Pacearchaeota_archaeon_RBG_19FT_COMBO_34_9|GCA_001786415
GCA_002496015.1	Pacearchaeota	Pacearchaeota	none	Pacearchaeota	Archaea	DPANN	Pacearchaeota	none	none	none	none	Candidatus_Pacearchaeota_archaeon_UBA73	GCA_002496015	Pacearchaeota|DPANN|Pacearchaeota|none|none|none|none|Candidatus_Pacearchaeota_archaeon_UBA73|GCA_002496015	Pacearchaeota|DPANN|Pacearchaeota|none|none|none|none|Candidatus_Pacearchaeota_archaeon_UBA73|GCA_002496015
GCA_002497285.1	Pacearchaeota	Pacearchaeota	none	Pacearchaeota	Archaea	DPANN	Pacearchaeota	none	none	none	none	Candidatus_Pacearchaeota_archaeon_UBA92	GCA_002497285	Pacearchaeota|DPANN|Pacearchaeota|none|none|none|none|Candidatus_Pacearchaeota_archaeon_UBA92|GCA_002497285	Pacearchaeota|DPANN|Pacearchaeota|none|none|none|none|Candidatus_Pacearchaeota_archaeon_UBA92|GCA_002497285
GCA_002762835.1	Pacearchaeota	Pacearchaeota	none	Pacearchaeota	Archaea	DPANN	Pacearchaeota	none	none	none	none	Candidatus_Woesearchaeota_archaeon_CG10_big_fil_rev_8_21_14_0_10_34_12	GCA_002762835	Pacearchaeota|DPANN|Pacearchaeota|none|none|none|none|Candidatus_Woesearchaeota_archaeon_CG10_big_fil_rev_8_21_14_0_10_34_12|GCA_002762835	Pacearchaeota|DPANN|Pacearchaeota|none|none|none|none|Candidatus_Woesearchaeota_archaeon_CG10_big_fil_rev_8_21_14_0_10_34_12|GCA_002762835
GCA_000008085.1	Nanoarchaeota	Nanoarchaeota	none	Nanoarchaeota	Archaea	DPANN	Nanoarchaeota	none	Nanoarchaeales	Nanoarchaeaceae	Nanoarchaeum	Nanoarchaeum_equitans	GCA_000008085	Nanoarchaeota|DPANN|Nanoarchaeota|none|Nanoarchaeales|Nanoarchaeaceae|Nanoarchaeum|Nanoarchaeum_equitans|GCA_000008085	Nanoarchaeota|DPANN|Nanoarchaeota|none|Nanoarchaeales|Nanoarchaeaceae|Nanoarchaeum|Nanoarchaeum_equitans|GCA_000008085
GCA_000387965.1	Nanoarchaeota	Nanoarchaeota	none	Nanoarchaeota	Archaea	DPANN	Nanoarchaeota	none	Nanoarchaeales	Nanopusillaceae	Candidatus_Nanobsidianus	Candidatus_Nanobsidianus_stetteri	GCA_000387965	Nanoarchaeota|DPANN|Nanoarchaeota|none|Nanoarchaeales|Nanopusillaceae|Candidatus_Nanobsidianus|Candidatus_Nanobsidianus_stetteri|GCA_000387965	Nanoarchaeota|DPANN|Nanoarchaeota|none|Nanoarchaeales|Nanopusillaceae|Candidatus_Nanobsidianus|Candidatus_Nanobsidianus_stetteri|GCA_000387965
GCA_001552015.1	Nanoarchaeota	Nanoarchaeota	none	Nanoarchaeota	Archaea	DPANN	Nanoarchaeota	none	Nanoarchaeales	Nanopusillaceae	Candidatus_Nanopusillus	Candidatus_Nanopusillus_acidilobi_7A	GCA_001552015	Nanoarchaeota|DPANN|Nanoarchaeota|none|Nanoarchaeales|Nanopusillaceae|Candidatus_Nanopusillus|Candidatus_Nanopusillus_acidilobi_7A|GCA_001552015	Nanoarchaeota|DPANN|Nanoarchaeota|none|Nanoarchaeales|Nanopusillaceae|Candidatus_Nanopusillus|Candidatus_Nanopusillus_acidilobi_7A|GCA_001552015
GCA_003568775.1	Nanoarchaeota	Nanoarchaeota	none	Nanoarchaeota	Archaea	DPANN	Nanoarchaeota	none	none	none	Candidatus_Nanoclepta	Candidatus_Nanoclepta_minutus	GCA_003568775	Nanoarchaeota|DPANN|Nanoarchaeota|none|none|none|Candidatus_Nanoclepta|Candidatus_Nanoclepta_minutus|GCA_003568775	Nanoarchaeota|DPANN|Nanoarchaeota|none|none|none|Candidatus_Nanoclepta|Candidatus_Nanoclepta_minutus|GCA_003568775
GCA_002503995.1	Parvarchaeota	Parvarchaeota	none	Parvarchaeota	Archaea	DPANN	Parvarchaeota	none	none	none	none	Candidatus_Parvarchaeota_archaeon_UBA265	GCA_002503995	Parvarchaeota|DPANN|Parvarchaeota|none|none|none|none|Candidatus_Parvarchaeota_archaeon_UBA265|GCA_002503995	Parvarchaeota|DPANN|Parvarchaeota|none|none|none|none|Candidatus_Parvarchaeota_archaeon_UBA265|GCA_002503995
GCA_002499655.1	Parvarchaeota	Parvarchaeota	none	Parvarchaeota	Archaea	DPANN	Parvarchaeota	none	none	none	none	Candidatus_Parvarchaeota_archaeon_UBA506	GCA_002499655	Parvarchaeota|DPANN|Parvarchaeota|none|none|none|none|Candidatus_Parvarchaeota_archaeon_UBA506|GCA_002499655	Parvarchaeota|DPANN|Parvarchaeota|none|none|none|none|Candidatus_Parvarchaeota_archaeon_UBA506|GCA_002499655
GCA_007130955.1	DeepParv	DeepParv	none	DeepParv	Archaea	DPANN	DeepParv	none	none	none	none	Candidatus_Woesearchaeota_archaeon	GCA_007130955	DeepParv|DPANN|DeepParv|none|none|none|none|Candidatus_Woesearchaeota_archaeon|GCA_007130955	DeepParv|DPANN|DeepParv|none|none|none|none|Candidatus_Woesearchaeota_archaeon|GCA_007130955
GCA_007133845.1	DeepParv	DeepParv	none	DeepParv	Archaea	DPANN	DeepParv	none	none	none	none	Candidatus_Woesearchaeota_archaeon	GCA_007133845	DeepParv|DPANN|DeepParv|none|none|none|none|Candidatus_Woesearchaeota_archaeon|GCA_007133845	DeepParv|DPANN|DeepParv|none|none|none|none|Candidatus_Woesearchaeota_archaeon|GCA_007133845
GCA_002785105.1	Huberarchaea	Huberarchaea	none	Huberarchaea	Archaea	DPANN	Huberarchaea	none	none	none	Candidatus_Huberiarchaeum	Candidatus_Huberiarchaeum_crystalense	GCA_002785105	Huberarchaea|DPANN|Huberarchaea|none|none|none|Candidatus_Huberiarchaeum|Candidatus_Huberiarchaeum_crystalense|GCA_002785105	Huberarchaea|DPANN|Huberarchaea|none|none|none|Candidatus_Huberiarchaeum|Candidatus_Huberiarchaeum_crystalense|GCA_002785105
GCA_002841675.1	Huberarchaea	Huberarchaea	none	Huberarchaea	Archaea	DPANN	Huberarchaea	none	none	none	none	Euryarchaeota_archaeon_HGW-Euryarchaeota-1	GCA_002841675	Huberarchaea|DPANN|Huberarchaea|none|none|none|none|Euryarchaeota_archaeon_HGW-Euryarchaeota-1|GCA_002841675	Huberarchaea|DPANN|Huberarchaea|none|none|none|none|Euryarchaeota_archaeon_HGW-Euryarchaeota-1|GCA_002841675
GCA_000405245.1	Aenigmarchaeota	Aenigmarchaeota	none	Aenigmarchaeota	Archaea	DPANN	Aenigmarchaeota	none	none	none	Candidatus_Aenigmarchaeum	Candidatus_Aenigmarchaeum_subterraneum	GCA_000405245	Aenigmarchaeota|DPANN|Aenigmarchaeota|none|none|none|Candidatus_Aenigmarchaeum|Candidatus_Aenigmarchaeum_subterraneum|GCA_000405245	Aenigmarchaeota|DPANN|Aenigmarchaeota|none|none|none|Candidatus_Aenigmarchaeum|Candidatus_Aenigmarchaeum_subterraneum|GCA_000405245
GCA_003554235.1	Aenigmarchaeota	Aenigmarchaeota	none	Aenigmarchaeota	Archaea	DPANN	Aenigmarchaeota	none	none	none	none	Candidatus_Aenigmarchaeota_archaeon	GCA_003554235	Aenigmarchaeota|DPANN|Aenigmarchaeota|none|none|none|none|Candidatus_Aenigmarchaeota_archaeon|GCA_003554235	Aenigmarchaeota|DPANN|Aenigmarchaeota|none|none|none|none|Candidatus_Aenigmarchaeota_archaeon|GCA_003554235
GCA_003554845.1	Aenigmarchaeota	Aenigmarchaeota	none	Aenigmarchaeota	Archaea	DPANN	Aenigmarchaeota	none	none	none	none	Candidatus_Aenigmarchaeota_archaeon	GCA_003554845	Aenigmarchaeota|DPANN|Aenigmarchaeota|none|none|none|none|Candidatus_Aenigmarchaeota_archaeon|GCA_003554845	Aenigmarchaeota|DPANN|Aenigmarchaeota|none|none|none|none|Candidatus_Aenigmarchaeota_archaeon|GCA_003554845
GCA_003663225.1	Aenigmarchaeota	Aenigmarchaeota	none	Aenigmarchaeota	Archaea	DPANN	Aenigmarchaeota	none	none	none	none	Candidatus_Aenigmarchaeota_archaeon	GCA_003663225	Aenigmarchaeota|DPANN|Aenigmarchaeota|none|none|none|none|Candidatus_Aenigmarchaeota_archaeon|GCA_003663225	Aenigmarchaeota|DPANN|Aenigmarchaeota|none|none|none|none|Candidatus_Aenigmarchaeota_archaeon|GCA_003663225
GCA_003663325.1	Aenigmarchaeota	Aenigmarchaeota	none	Aenigmarchaeota	Archaea	DPANN	Aenigmarchaeota	none	none	none	none	Candidatus_Aenigmarchaeota_archaeon	GCA_003663325	Aenigmarchaeota|DPANN|Aenigmarchaeota|none|none|none|none|Candidatus_Aenigmarchaeota_archaeon|GCA_003663325	Aenigmarchaeota|DPANN|Aenigmarchaeota|none|none|none|none|Candidatus_Aenigmarchaeota_archaeon|GCA_003663325
GCA_003663345.1	Aenigmarchaeota	Aenigmarchaeota	none	Aenigmarchaeota	Archaea	DPANN	Aenigmarchaeota	none	none	none	none	Candidatus_Aenigmarchaeota_archaeon	GCA_003663345	Aenigmarchaeota|DPANN|Aenigmarchaeota|none|none|none|none|Candidatus_Aenigmarchaeota_archaeon|GCA_003663345	Aenigmarchaeota|DPANN|Aenigmarchaeota|none|none|none|none|Candidatus_Aenigmarchaeota_archaeon|GCA_003663345
GCA_003663355.1	Aenigmarchaeota	Aenigmarchaeota	none	Aenigmarchaeota	Archaea	DPANN	Aenigmarchaeota	none	none	none	none	Candidatus_Aenigmarchaeota_archaeon	GCA_003663355	Aenigmarchaeota|DPANN|Aenigmarchaeota|none|none|none|none|Candidatus_Aenigmarchaeota_archaeon|GCA_003663355	Aenigmarchaeota|DPANN|Aenigmarchaeota|none|none|none|none|Candidatus_Aenigmarchaeota_archaeon|GCA_003663355
GCA_003663445.1	Aenigmarchaeota	Aenigmarchaeota	none	Aenigmarchaeota	Archaea	DPANN	Aenigmarchaeota	none	none	none	none	Candidatus_Aenigmarchaeota_archaeon	GCA_003663445	Aenigmarchaeota|DPANN|Aenigmarchaeota|none|none|none|none|Candidatus_Aenigmarchaeota_archaeon|GCA_003663445	Aenigmarchaeota|DPANN|Aenigmarchaeota|none|none|none|none|Candidatus_Aenigmarchaeota_archaeon|GCA_003663445
GCA_003663475.1	Aenigmarchaeota	Aenigmarchaeota	none	Aenigmarchaeota	Archaea	DPANN	Aenigmarchaeota	none	none	none	none	Candidatus_Aenigmarchaeota_archaeon	GCA_003663475	Aenigmarchaeota|DPANN|Aenigmarchaeota|none|none|none|none|Candidatus_Aenigmarchaeota_archaeon|GCA_003663475	Aenigmarchaeota|DPANN|Aenigmarchaeota|none|none|none|none|Candidatus_Aenigmarchaeota_archaeon|GCA_003663475
GCA_002789635.1	Aenigmarchaeota	Aenigmarchaeota	none	Aenigmarchaeota	Archaea	DPANN	Aenigmarchaeota	none	none	none	none	Candidatus_Aenigmarchaeota_archaeon_CG_4_9_14_3_um_filter_37_18	GCA_002789635	Aenigmarchaeota|DPANN|Aenigmarchaeota|none|none|none|none|Candidatus_Aenigmarchaeota_archaeon_CG_4_9_14_3_um_filter_37_18|GCA_002789635	Aenigmarchaeota|DPANN|Aenigmarchaeota|none|none|none|none|Candidatus_Aenigmarchaeota_archaeon_CG_4_9_14_3_um_filter_37_18|GCA_002789635
GCA_002254545.1	Aenigmarchaeota	Aenigmarchaeota	none	Aenigmarchaeota	Archaea	DPANN	Aenigmarchaeota	none	none	none	none	Candidatus_Aenigmarchaeota_archaeon_ex4484_224	GCA_002254545	Aenigmarchaeota|DPANN|Aenigmarchaeota|none|none|none|none|Candidatus_Aenigmarchaeota_archaeon_ex4484_224|GCA_002254545	Aenigmarchaeota|DPANN|Aenigmarchaeota|none|none|none|none|Candidatus_Aenigmarchaeota_archaeon_ex4484_224|GCA_002254545
GCA_001784635.1	Aenigmarchaeota	Aenigmarchaeota	none	Aenigmarchaeota	Archaea	DPANN	Aenigmarchaeota	none	none	none	none	Candidatus_Micrarchaeota_archaeon_RBG_16_49_10	GCA_001784635	Aenigmarchaeota|DPANN|Aenigmarchaeota|none|none|none|none|Candidatus_Micrarchaeota_archaeon_RBG_16_49_10|GCA_001784635	Aenigmarchaeota|DPANN|Aenigmarchaeota|none|none|none|none|Candidatus_Micrarchaeota_archaeon_RBG_16_49_10|GCA_001784635
GCA_000220355.1	Nanohaloarchaeota	Nanohaloarchaeota	Nanohaloarchaea	Nanohaloarchaeota	Archaea	DPANN	Nanohaloarchaeota	Nanohaloarchaea	none	none	Candidatus_Nanosalinarum	Candidatus_Nanosalinarum_sp__J07AB56	GCA_000220355	Nanohaloarchaeota|DPANN|Nanohaloarchaeota|Nanohaloarchaea|none|none|Candidatus_Nanosalinarum|Candidatus_Nanosalinarum_sp__J07AB56|GCA_000220355	Nanohaloarchaeota|DPANN|Nanohaloarchaeota|Nanohaloarchaea|none|none|Candidatus_Nanosalinarum|Candidatus_Nanosalinarum_sp__J07AB56|GCA_000220355
GCA_001563875.1	Nanohaloarchaeota	Nanohaloarchaeota	Nanohaloarchaea	Nanohaloarchaeota	Archaea	DPANN	Nanohaloarchaeota	Nanohaloarchaea	none	none	none	Nanohaloarchaea_archaeon_B1-Br10_U2g1	GCA_001563875	Nanohaloarchaeota|DPANN|Nanohaloarchaeota|Nanohaloarchaea|none|none|none|Nanohaloarchaea_archaeon_B1-Br10_U2g1|GCA_001563875	Nanohaloarchaeota|DPANN|Nanohaloarchaeota|Nanohaloarchaea|none|none|none|Nanohaloarchaea_archaeon_B1-Br10_U2g1|GCA_001563875
GCA_001564145.1	Nanohaloarchaeota	Nanohaloarchaeota	Nanohaloarchaea	Nanohaloarchaeota	Archaea	DPANN	Nanohaloarchaeota	Nanohaloarchaea	none	none	none	Nanohaloarchaea_archaeon_B1-Br10_U2g29	GCA_001564145	Nanohaloarchaeota|DPANN|Nanohaloarchaeota|Nanohaloarchaea|none|none|none|Nanohaloarchaea_archaeon_B1-Br10_U2g29|GCA_001564145	Nanohaloarchaeota|DPANN|Nanohaloarchaeota|Nanohaloarchaea|none|none|none|Nanohaloarchaea_archaeon_B1-Br10_U2g29|GCA_001564145
GCA_001564035.1	Nanohaloarchaeota	Nanohaloarchaeota	Nanohaloarchaea	Nanohaloarchaeota	Archaea	DPANN	Nanohaloarchaeota	Nanohaloarchaea	none	none	none	Nanohaloarchaea_archaeon_PL-Br10_U2g27	GCA_001564035	Nanohaloarchaeota|DPANN|Nanohaloarchaeota|Nanohaloarchaea|none|none|none|Nanohaloarchaea_archaeon_PL-Br10_U2g27|GCA_001564035	Nanohaloarchaeota|DPANN|Nanohaloarchaeota|Nanohaloarchaea|none|none|none|Nanohaloarchaea_archaeon_PL-Br10_U2g27|GCA_001564035
GCA_001761425.1	Nanohaloarchaeota	Nanohaloarchaeota	Nanohaloarchaea	Nanohaloarchaeota	Archaea	DPANN	Nanohaloarchaeota	Nanohaloarchaea	none	none	none	Nanohaloarchaea_archaeon_SG9	GCA_001761425	Nanohaloarchaeota|DPANN|Nanohaloarchaeota|Nanohaloarchaea|none|none|none|Nanohaloarchaea_archaeon_SG9|GCA_001761425	Nanohaloarchaeota|DPANN|Nanohaloarchaeota|Nanohaloarchaea|none|none|none|Nanohaloarchaea_archaeon_SG9|GCA_001761425
GCA_003009815.1	Nanohaloarchaeota	Nanohaloarchaeota	Nanohaloarchaea	Nanohaloarchaeota	Archaea	DPANN	Nanohaloarchaeota	Nanohaloarchaea	none	none	none	Nanohaloarchaea_archaeon_SW_4_43_9	GCA_003009815	Nanohaloarchaeota|DPANN|Nanohaloarchaeota|Nanohaloarchaea|none|none|none|Nanohaloarchaea_archaeon_SW_4_43_9|GCA_003009815	Nanohaloarchaeota|DPANN|Nanohaloarchaeota|Nanohaloarchaea|none|none|none|Nanohaloarchaea_archaeon_SW_4_43_9|GCA_003009815
GCA_003660865.1	Nanohaloarchaeota	Nanohaloarchaeota	none	Nanohaloarchaeota	Archaea	DPANN	Nanohaloarchaeota	none	none	none	none	Candidatus_Nanohaloarchaeota_archaeon	GCA_003660865	Nanohaloarchaeota|DPANN|Nanohaloarchaeota|none|none|none|none|Candidatus_Nanohaloarchaeota_archaeon|GCA_003660865	Nanohaloarchaeota|DPANN|Nanohaloarchaeota|none|none|none|none|Candidatus_Nanohaloarchaeota_archaeon|GCA_003660865
GCA_003660905.1	Nanohaloarchaeota	Nanohaloarchaeota	none	Nanohaloarchaeota	Archaea	DPANN	Nanohaloarchaeota	none	none	none	none	Candidatus_Nanohaloarchaeota_archaeon	GCA_003660905	Nanohaloarchaeota|DPANN|Nanohaloarchaeota|none|none|none|none|Candidatus_Nanohaloarchaeota_archaeon|GCA_003660905	Nanohaloarchaeota|DPANN|Nanohaloarchaeota|none|none|none|none|Candidatus_Nanohaloarchaeota_archaeon|GCA_003660905
GCA_002494525.1	UAP2	Undinarchaeota	none	Undinarchaeota	Archaea	DPANN	UAP2	none	none	none	none	archaeon_UBA490	GCA_002494525	Undinarchaeota|DPANN|UAP2|none|none|none|none|archaeon_UBA490|GCA_002494525	Undinarchaeota|DPANN|UAP2|none|none|none|none|archaeon_UBA490|GCA_002494525
GCA_002502135.1	UAP2	Undinarchaeota	none	Undinarchaeota	Archaea	DPANN	UAP2	none	none	none	none	archaeon_UBA543	GCA_002502135	Undinarchaeota|DPANN|UAP2|none|none|none|none|archaeon_UBA543|GCA_002502135	Undinarchaeota|DPANN|UAP2|none|none|none|none|archaeon_UBA543|GCA_002502135
GCA_002495465.1	UAP2	Undinarchaeota	none	Undinarchaeota	Archaea	DPANN	UAP2	none	none	none	none	archaeon_UBA55	GCA_002495465	Undinarchaeota|DPANN|UAP2|none|none|none|none|archaeon_UBA55|GCA_002495465	Undinarchaeota|DPANN|UAP2|none|none|none|none|archaeon_UBA55|GCA_002495465
GCA_002214165.1	Micrarchaeota	Micrarchaeota	none	Micrarchaeota	Archaea	DPANN	Micrarchaeota	none	none	none	Candidatus_Mancarchaeum	Candidatus_Mancarchaeum_acidiphilum_Mia14	GCA_002214165	Micrarchaeota|DPANN|Micrarchaeota|none|none|none|Candidatus_Mancarchaeum|Candidatus_Mancarchaeum_acidiphilum_Mia14|GCA_002214165	Micrarchaeota|DPANN|Micrarchaeota|none|none|none|Candidatus_Mancarchaeum|Candidatus_Mancarchaeum_acidiphilum_Mia14|GCA_002214165
GCA_001896515.1	Micrarchaeota	Micrarchaeota	none	Micrarchaeota	Archaea	DPANN	Micrarchaeota	none	none	none	Candidatus_Micrarchaeum	Candidatus_Micrarchaeum_sp__AZ1	GCA_001896515	Micrarchaeota|DPANN|Micrarchaeota|none|none|none|Candidatus_Micrarchaeum|Candidatus_Micrarchaeum_sp__AZ1|GCA_001896515	Micrarchaeota|DPANN|Micrarchaeota|none|none|none|Candidatus_Micrarchaeum|Candidatus_Micrarchaeum_sp__AZ1|GCA_001896515
GCA_003660965.1	Micrarchaeota	Micrarchaeota	none	Micrarchaeota	Archaea	DPANN	Micrarchaeota	none	none	none	none	Candidatus_Micrarchaeota_archaeon	GCA_003660965	Micrarchaeota|DPANN|Micrarchaeota|none|none|none|none|Candidatus_Micrarchaeota_archaeon|GCA_003660965	Micrarchaeota|DPANN|Micrarchaeota|none|none|none|none|Candidatus_Micrarchaeota_archaeon|GCA_003660965
GCA_002792955.1	Micrarchaeota	Micrarchaeota	none	Micrarchaeota	Archaea	DPANN	Micrarchaeota	none	none	none	none	Candidatus_Micrarchaeota_archaeon_CG_4_10_14_0_2_um_filter_49_7	GCA_002792955	Micrarchaeota|DPANN|Micrarchaeota|none|none|none|none|Candidatus_Micrarchaeota_archaeon_CG_4_10_14_0_2_um_filter_49_7|GCA_002792955	Micrarchaeota|DPANN|Micrarchaeota|none|none|none|none|Candidatus_Micrarchaeota_archaeon_CG_4_10_14_0_2_um_filter_49_7|GCA_002792955
GCA_002792915.1	Micrarchaeota	Micrarchaeota	none	Micrarchaeota	Archaea	DPANN	Micrarchaeota	none	none	none	none	Candidatus_Micrarchaeota_archaeon_CG_4_10_14_0_2_um_filter_60_11	GCA_002792915	Micrarchaeota|DPANN|Micrarchaeota|none|none|none|none|Candidatus_Micrarchaeota_archaeon_CG_4_10_14_0_2_um_filter_60_11|GCA_002792915	Micrarchaeota|DPANN|Micrarchaeota|none|none|none|none|Candidatus_Micrarchaeota_archaeon_CG_4_10_14_0_2_um_filter_60_11|GCA_002792915
GCA_002763275.1	Micrarchaeota	Micrarchaeota	none	Micrarchaeota	Archaea	DPANN	Micrarchaeota	none	none	none	none	Candidatus_Micrarchaeota_archaeon_CG09_land_8_20_14_0_10_55_25	GCA_002763275	Micrarchaeota|DPANN|Micrarchaeota|none|none|none|none|Candidatus_Micrarchaeota_archaeon_CG09_land_8_20_14_0_10_55_25|GCA_002763275	Micrarchaeota|DPANN|Micrarchaeota|none|none|none|none|Candidatus_Micrarchaeota_archaeon_CG09_land_8_20_14_0_10_55_25|GCA_002763275
GCA_001871475.1	Micrarchaeota	Micrarchaeota	none	Micrarchaeota	Archaea	DPANN	Micrarchaeota	none	none	none	none	Candidatus_Micrarchaeota_archaeon_CG1_02_47_40	GCA_001871475	Micrarchaeota|DPANN|Micrarchaeota|none|none|none|none|Candidatus_Micrarchaeota_archaeon_CG1_02_47_40|GCA_001871475	Micrarchaeota|DPANN|Micrarchaeota|none|none|none|none|Candidatus_Micrarchaeota_archaeon_CG1_02_47_40|GCA_001871475
GCA_001871495.1	Micrarchaeota	Micrarchaeota	none	Micrarchaeota	Archaea	DPANN	Micrarchaeota	none	none	none	none	Candidatus_Micrarchaeota_archaeon_CG1_02_51_15	GCA_001871495	Micrarchaeota|DPANN|Micrarchaeota|none|none|none|none|Candidatus_Micrarchaeota_archaeon_CG1_02_51_15|GCA_001871495	Micrarchaeota|DPANN|Micrarchaeota|none|none|none|none|Candidatus_Micrarchaeota_archaeon_CG1_02_51_15|GCA_001871495
GCA_002778455.1	Micrarchaeota	Micrarchaeota	none	Micrarchaeota	Archaea	DPANN	Micrarchaeota	none	none	none	none	Candidatus_Micrarchaeota_archaeon_CG10_big_fil_rev_8_21_14_0_10_45_29	GCA_002778455	Micrarchaeota|DPANN|Micrarchaeota|none|none|none|none|Candidatus_Micrarchaeota_archaeon_CG10_big_fil_rev_8_21_14_0_10_45_29|GCA_002778455	Micrarchaeota|DPANN|Micrarchaeota|none|none|none|none|Candidatus_Micrarchaeota_archaeon_CG10_big_fil_rev_8_21_14_0_10_45_29|GCA_002778455
GCA_002507385.1	Micrarchaeota	Micrarchaeota	none	Micrarchaeota	Archaea	DPANN	Micrarchaeota	none	none	none	none	Candidatus_Micrarchaeota_archaeon_UBA97	GCA_002507385	Micrarchaeota|DPANN|Micrarchaeota|none|none|none|none|Candidatus_Micrarchaeota_archaeon_UBA97|GCA_002507385	Micrarchaeota|DPANN|Micrarchaeota|none|none|none|none|Candidatus_Micrarchaeota_archaeon_UBA97|GCA_002507385
GCA_003553825.1	DeepDiapherotrites	DeepDiapherotrites	none	DeepDiapherotrites	Archaea	DPANN	DeepDiapherotrites	none	none	none	none	Candidatus_Diapherotrites_archaeon	GCA_003553825	DeepDiapherotrites|DPANN|DeepDiapherotrites|none|none|none|none|Candidatus_Diapherotrites_archaeon|GCA_003553825	DeepDiapherotrites|DPANN|DeepDiapherotrites|none|none|none|none|Candidatus_Diapherotrites_archaeon|GCA_003553825
GCA_003558235.1	DeepDiapherotrites	DeepDiapherotrites	none	DeepDiapherotrites	Archaea	DPANN	DeepDiapherotrites	none	none	none	none	Candidatus_Diapherotrites_archaeon	GCA_003558235	DeepDiapherotrites|DPANN|DeepDiapherotrites|none|none|none|none|Candidatus_Diapherotrites_archaeon|GCA_003558235	DeepDiapherotrites|DPANN|DeepDiapherotrites|none|none|none|none|Candidatus_Diapherotrites_archaeon|GCA_003558235
GCA_003660975.1	DeepDiapherotrites	DeepDiapherotrites	none	DeepDiapherotrites	Archaea	DPANN	DeepDiapherotrites	none	none	none	none	Candidatus_Micrarchaeota_archaeon	GCA_003660975	DeepDiapherotrites|DPANN|DeepDiapherotrites|none|none|none|none|Candidatus_Micrarchaeota_archaeon|GCA_003660975	DeepDiapherotrites|DPANN|DeepDiapherotrites|none|none|none|none|Candidatus_Micrarchaeota_archaeon|GCA_003660975
GCA_000402355.1	Diapherotrites	Diapherotrites	none	Diapherotrites	Archaea	DPANN	Diapherotrites	none	none	none	Candidatus_Iainarchaeum	Candidatus_Iainarchaeum_andersonii	GCA_000402355	Diapherotrites|DPANN|Diapherotrites|none|none|none|Candidatus_Iainarchaeum|Candidatus_Iainarchaeum_andersonii|GCA_000402355	Diapherotrites|DPANN|Diapherotrites|none|none|none|Candidatus_Iainarchaeum|Candidatus_Iainarchaeum_andersonii|GCA_000402355
GCA_000830275.1	Diapherotrites	Diapherotrites	none	Diapherotrites	Archaea	DPANN	Diapherotrites	none	none	none	none	archaeon_GW2011_AR10	GCA_000830275	Diapherotrites|DPANN|Diapherotrites|none|none|none|none|archaeon_GW2011_AR10|GCA_000830275	Diapherotrites|DPANN|Diapherotrites|none|none|none|none|archaeon_GW2011_AR10|GCA_000830275
GCA_002687735.1	Diapherotrites	Diapherotrites	none	Diapherotrites	Archaea	DPANN	Diapherotrites	none	none	none	none	Candidatus_Diapherotrites_archaeon	GCA_002687735	Diapherotrites|DPANN|Diapherotrites|none|none|none|none|Candidatus_Diapherotrites_archaeon|GCA_002687735	Diapherotrites|DPANN|Diapherotrites|none|none|none|none|Candidatus_Diapherotrites_archaeon|GCA_002687735
GCA_002688035.1	Diapherotrites	Diapherotrites	none	Diapherotrites	Archaea	DPANN	Diapherotrites	none	none	none	none	Candidatus_Diapherotrites_archaeon	GCA_002688035	Diapherotrites|DPANN|Diapherotrites|none|none|none|none|Candidatus_Diapherotrites_archaeon|GCA_002688035	Diapherotrites|DPANN|Diapherotrites|none|none|none|none|Candidatus_Diapherotrites_archaeon|GCA_002688035
GCA_003661685.1	Diapherotrites	Diapherotrites	none	Diapherotrites	Archaea	DPANN	Diapherotrites	none	none	none	none	Candidatus_Diapherotrites_archaeon	GCA_003661685	Diapherotrites|DPANN|Diapherotrites|none|none|none|none|Candidatus_Diapherotrites_archaeon|GCA_003661685	Diapherotrites|DPANN|Diapherotrites|none|none|none|none|Candidatus_Diapherotrites_archaeon|GCA_003661685
GCA_002763225.1	Diapherotrites	Diapherotrites	none	Diapherotrites	Archaea	DPANN	Diapherotrites	none	none	none	none	Candidatus_Diapherotrites_archaeon_CG10_big_fil_rev_8_21_14_0_10_31_34	GCA_002763225	Diapherotrites|DPANN|Diapherotrites|none|none|none|none|Candidatus_Diapherotrites_archaeon_CG10_big_fil_rev_8_21_14_0_10_31_34|GCA_002763225	Diapherotrites|DPANN|Diapherotrites|none|none|none|none|Candidatus_Diapherotrites_archaeon_CG10_big_fil_rev_8_21_14_0_10_31_34|GCA_002763225
GCA_002762975.1	Diapherotrites	Diapherotrites	none	Diapherotrites	Archaea	DPANN	Diapherotrites	none	none	none	none	Candidatus_Diapherotrites_archaeon_CG11_big_fil_rev_8_21_14_0_20_37_9	GCA_002762975	Diapherotrites|DPANN|Diapherotrites|none|none|none|none|Candidatus_Diapherotrites_archaeon_CG11_big_fil_rev_8_21_14_0_20_37_9|GCA_002762975	Diapherotrites|DPANN|Diapherotrites|none|none|none|none|Candidatus_Diapherotrites_archaeon_CG11_big_fil_rev_8_21_14_0_20_37_9|GCA_002762975
GCA_002785505.1	Altiarchaeota	Altiarchaeota	none	Altiarchaeota	Archaea	DPANN	Altiarchaeota	none	Altiarchaeales	none	Candidatus_Altiarchaeum	Candidatus_Altiarchaeum_sp__CG03_land_8_20_14_0_80_32_618	GCA_002785505	Altiarchaeota|DPANN|Altiarchaeota|none|Altiarchaeales|none|Candidatus_Altiarchaeum|Candidatus_Altiarchaeum_sp__CG03_land_8_20_14_0_80_32_618|GCA_002785505	Altiarchaeota|DPANN|Altiarchaeota|none|Altiarchaeales|none|Candidatus_Altiarchaeum|Candidatus_Altiarchaeum_sp__CG03_land_8_20_14_0_80_32_618|GCA_002785505
GCA_003663045.1	Altiarchaeota	Altiarchaeota	none	Altiarchaeota	Archaea	DPANN	Altiarchaeota	none	Altiarchaeales	none	none	Candidatus_Altiarchaeales_archaeon	GCA_003663045	Altiarchaeota|DPANN|Altiarchaeota|none|Altiarchaeales|none|none|Candidatus_Altiarchaeales_archaeon|GCA_003663045	Altiarchaeota|DPANN|Altiarchaeota|none|Altiarchaeales|none|none|Candidatus_Altiarchaeales_archaeon|GCA_003663045
GCA_003663125.1	Altiarchaeota	Altiarchaeota	none	Altiarchaeota	Archaea	DPANN	Altiarchaeota	none	Altiarchaeales	none	none	Candidatus_Altiarchaeales_archaeon	GCA_003663125	Altiarchaeota|DPANN|Altiarchaeota|none|Altiarchaeales|none|none|Candidatus_Altiarchaeales_archaeon|GCA_003663125	Altiarchaeota|DPANN|Altiarchaeota|none|Altiarchaeales|none|none|Candidatus_Altiarchaeales_archaeon|GCA_003663125
GCA_002083985.1	Altiarchaeota	Altiarchaeota	none	Altiarchaeota	Archaea	DPANN	Altiarchaeota	none	Altiarchaeales	none	none	Candidatus_Altiarchaeales_archaeon_A3	GCA_002083985	Altiarchaeota|DPANN|Altiarchaeota|none|Altiarchaeales|none|none|Candidatus_Altiarchaeales_archaeon_A3|GCA_002083985	Altiarchaeota|DPANN|Altiarchaeota|none|Altiarchaeales|none|none|Candidatus_Altiarchaeales_archaeon_A3|GCA_002083985
GCA_002254565.1	Altiarchaeota	Altiarchaeota	none	Altiarchaeota	Archaea	DPANN	Altiarchaeota	none	Altiarchaeales	none	none	Candidatus_Altiarchaeales_archaeon_ex4484_2	GCA_002254565	Altiarchaeota|DPANN|Altiarchaeota|none|Altiarchaeales|none|none|Candidatus_Altiarchaeales_archaeon_ex4484_2|GCA_002254565	Altiarchaeota|DPANN|Altiarchaeota|none|Altiarchaeales|none|none|Candidatus_Altiarchaeales_archaeon_ex4484_2|GCA_002254565
GCA_002841105.1	Altiarchaeota	Altiarchaeota	none	Altiarchaeota	Archaea	DPANN	Altiarchaeota	none	Altiarchaeales	none	none	Candidatus_Altiarchaeales_archaeon_HGW-Altiarchaeales-1	GCA_002841105	Altiarchaeota|DPANN|Altiarchaeota|none|Altiarchaeales|none|none|Candidatus_Altiarchaeales_archaeon_HGW-Altiarchaeales-1|GCA_002841105	Altiarchaeota|DPANN|Altiarchaeota|none|Altiarchaeales|none|none|Candidatus_Altiarchaeales_archaeon_HGW-Altiarchaeales-1|GCA_002841105
GCA_001723855.1	Altiarchaeota	Altiarchaeota	none	Altiarchaeota	Archaea	DPANN	Altiarchaeota	none	Altiarchaeales	none	none	Candidatus_Altiarchaeales_archaeon_WOR_SM1_86-2	GCA_001723855	Altiarchaeota|DPANN|Altiarchaeota|none|Altiarchaeales|none|none|Candidatus_Altiarchaeales_archaeon_WOR_SM1_86-2|GCA_001723855	Altiarchaeota|DPANN|Altiarchaeota|none|Altiarchaeales|none|none|Candidatus_Altiarchaeales_archaeon_WOR_SM1_86-2|GCA_001723855
GCA_000402775.1	Altiarchaeota	Altiarchaeota	none	Altiarchaeota	Archaea	DPANN	Altiarchaeota	none	Altiarchaeales	none	none	Euryarchaeota_archaeon_SCGC_AAA252-I15	GCA_000402775	Altiarchaeota|DPANN|Altiarchaeota|none|Altiarchaeales|none|none|Euryarchaeota_archaeon_SCGC_AAA252-I15|GCA_000402775	Altiarchaeota|DPANN|Altiarchaeota|none|Altiarchaeales|none|none|Euryarchaeota_archaeon_SCGC_AAA252-I15|GCA_000402775
GCA_000745965.1	Acidobacteria	Acidobacteriales	Acidobacteriia	Acidobacteriia	Bacteria	none	Acidobacteria	Acidobacteriia	Acidobacteriales	Acidobacteriaceae	Edaphobacter	Edaphobacter_aggregans	GCA_000745965	Acidobacteria|none|Acidobacteria|Acidobacteriia|Acidobacteriales|Acidobacteriaceae|Edaphobacter|Edaphobacter_aggregans|GCA_000745965	Acidobacteriia|none|Acidobacteria|Acidobacteriia|Acidobacteriales|Acidobacteriaceae|Edaphobacter|Edaphobacter_aggregans|GCA_000745965
GCA_000178975.2	Acidobacteria	Acidobacteriales	Acidobacteriia	Acidobacteriia	Bacteria	none	Acidobacteria	Acidobacteriia	Acidobacteriales	Acidobacteriaceae	Granulicella	Granulicella_tundricola	GCA_000178975	Acidobacteria|none|Acidobacteria|Acidobacteriia|Acidobacteriales|Acidobacteriaceae|Granulicella|Granulicella_tundricola|GCA_000178975	Acidobacteriia|none|Acidobacteria|Acidobacteriia|Acidobacteriales|Acidobacteriaceae|Granulicella|Granulicella_tundricola|GCA_000178975
GCA_001449115.1	Acidobacteria	Acidobacteriales	Acidobacteriia	Acidobacteriia	Bacteria	none	Acidobacteria	Acidobacteriia	Acidobacteriales	Acidobacteriaceae	Terracidiphilus	Terracidiphilus_gabretensis	GCA_001449115	Acidobacteria|none|Acidobacteria|Acidobacteriia|Acidobacteriales|Acidobacteriaceae|Terracidiphilus|Terracidiphilus_gabretensis|GCA_001449115	Acidobacteriia|none|Acidobacteria|Acidobacteriia|Acidobacteriales|Acidobacteriaceae|Terracidiphilus|Terracidiphilus_gabretensis|GCA_001449115
GCA_000428885.1	Acidobacteria	Holophagales	Holophagae	Holophagae	Bacteria	none	Acidobacteria	Holophagae	Holophagales	Holophagaceae	Geothrix	Geothrix_fermentans	GCA_000428885	Acidobacteria|none|Acidobacteria|Holophagae|Holophagales|Holophagaceae|Geothrix|Geothrix_fermentans|GCA_000428885	Holophagae|none|Acidobacteria|Holophagae|Holophagales|Holophagaceae|Geothrix|Geothrix_fermentans|GCA_000428885
GCA_000949295.1	Actinobacteria	Acidimicrobiales	Acidimicrobiia	Acidimicrobiia	Bacteria	none	Actinobacteria	Acidimicrobiia	Acidimicrobiales	Acidimicrobiaceae	Acidithrix	Acidithrix_ferrooxidans	GCA_000949295	Actinobacteria|none|Actinobacteria|Acidimicrobiia|Acidimicrobiales|Acidimicrobiaceae|Acidithrix|Acidithrix_ferrooxidans|GCA_000949295	Acidimicrobiia|none|Actinobacteria|Acidimicrobiia|Acidimicrobiales|Acidimicrobiaceae|Acidithrix|Acidithrix_ferrooxidans|GCA_000949295
GCA_900128965.1	Actinobacteria	Acidimicrobiales	Acidimicrobiia	Acidimicrobiia	Bacteria	none	Actinobacteria	Acidimicrobiia	Acidimicrobiales	Acidimicrobiaceae	Ferrithrix	Ferrithrix_thermotolerans	GCA_900128965	Actinobacteria|none|Actinobacteria|Acidimicrobiia|Acidimicrobiales|Acidimicrobiaceae|Ferrithrix|Ferrithrix_thermotolerans|GCA_900128965	Acidimicrobiia|none|Actinobacteria|Acidimicrobiia|Acidimicrobiales|Acidimicrobiaceae|Ferrithrix|Ferrithrix_thermotolerans|GCA_900128965
GCA_000612055.1	Actinobacteria	Actinomycetales	Actinobacteria	Actinobacteria	Bacteria	none	Actinobacteria	Actinobacteria	Actinomycetales	Actinomycetaceae	Trueperella	Trueperella_pyogenes	GCA_000612055	Actinobacteria|none|Actinobacteria|Actinobacteria|Actinomycetales|Actinomycetaceae|Trueperella|Trueperella_pyogenes|GCA_000612055	Actinobacteria|none|Actinobacteria|Actinobacteria|Actinomycetales|Actinomycetaceae|Trueperella|Trueperella_pyogenes|GCA_000612055
GCA_000371785.1	Actinobacteria	Actinopolysporales	Actinobacteria	Actinobacteria	Bacteria	none	Actinobacteria	Actinobacteria	Actinopolysporales	Actinopolysporaceae	Actinopolyspora	Actinopolyspora_halophila	GCA_000371785	Actinobacteria|none|Actinobacteria|Actinobacteria|Actinopolysporales|Actinopolysporaceae|Actinopolyspora|Actinopolyspora_halophila|GCA_000371785	Actinobacteria|none|Actinobacteria|Actinobacteria|Actinopolysporales|Actinopolysporaceae|Actinopolyspora|Actinopolyspora_halophila|GCA_000371785
GCA_000025205.1	Actinobacteria	Bifidobacteriales	Actinobacteria	Actinobacteria	Bacteria	none	Actinobacteria	Actinobacteria	Bifidobacteriales	Bifidobacteriaceae	Gardnerella	Gardnerella_vaginalis	GCA_000025205	Actinobacteria|none|Actinobacteria|Actinobacteria|Bifidobacteriales|Bifidobacteriaceae|Gardnerella|Gardnerella_vaginalis|GCA_000025205	Actinobacteria|none|Actinobacteria|Actinobacteria|Bifidobacteriales|Bifidobacteriaceae|Gardnerella|Gardnerella_vaginalis|GCA_000025205
GCA_000214175.1	Actinobacteria	Corynebacteriales	Actinobacteria	Actinobacteria	Bacteria	none	Actinobacteria	Actinobacteria	Corynebacteriales	Mycobacteriaceae	Hoyosella	Hoyosella_subflava	GCA_000214175	Actinobacteria|none|Actinobacteria|Actinobacteria|Corynebacteriales|Mycobacteriaceae|Hoyosella|Hoyosella_subflava|GCA_000214175	Actinobacteria|none|Actinobacteria|Actinobacteria|Corynebacteriales|Mycobacteriaceae|Hoyosella|Hoyosella_subflava|GCA_000214175
GCA_002086485.1	Actinobacteria	Corynebacteriales	Actinobacteria	Actinobacteria	Bacteria	none	Actinobacteria	Actinobacteria	Corynebacteriales	Mycobacteriaceae	Mycobacterium	Mycobacterium_aquaticum	GCA_002086485	Actinobacteria|none|Actinobacteria|Actinobacteria|Corynebacteriales|Mycobacteriaceae|Mycobacterium|Mycobacterium_aquaticum|GCA_002086485	Actinobacteria|none|Actinobacteria|Actinobacteria|Corynebacteriales|Mycobacteriaceae|Mycobacterium|Mycobacterium_aquaticum|GCA_002086485
GCA_000058485.1	Actinobacteria	Frankiales	Actinobacteria	Actinobacteria	Bacteria	none	Actinobacteria	Actinobacteria	Frankiales	Frankiaceae	Frankia	Frankia_alni	GCA_000058485	Actinobacteria|none|Actinobacteria|Actinobacteria|Frankiales|Frankiaceae|Frankia|Frankia_alni|GCA_000058485	Actinobacteria|none|Actinobacteria|Actinobacteria|Frankiales|Frankiaceae|Frankia|Frankia_alni|GCA_000058485
GCA_900110555.1	Actinobacteria	Geodermatophilales	Actinobacteria	Actinobacteria	Bacteria	none	Actinobacteria	Actinobacteria	Geodermatophilales	Geodermatophilaceae	Blastococcus	Blastococcus_endophyticus	GCA_900110555	Actinobacteria|none|Actinobacteria|Actinobacteria|Geodermatophilales|Geodermatophilaceae|Blastococcus|Blastococcus_endophyticus|GCA_900110555	Actinobacteria|none|Actinobacteria|Actinobacteria|Geodermatophilales|Geodermatophilaceae|Blastococcus|Blastococcus_endophyticus|GCA_900110555
GCA_000482705.1	Actinobacteria	Glycomycetales	Actinobacteria	Actinobacteria	Bacteria	none	Actinobacteria	Actinobacteria	Glycomycetales	Glycomycetaceae	Glycomyces	Glycomyces_arizonensis	GCA_000482705	Actinobacteria|none|Actinobacteria|Actinobacteria|Glycomycetales|Glycomycetaceae|Glycomyces|Glycomyces_arizonensis|GCA_000482705	Actinobacteria|none|Actinobacteria|Actinobacteria|Glycomycetales|Glycomycetaceae|Glycomyces|Glycomyces_arizonensis|GCA_000482705
GCA_003014555.1	Actinobacteria	Jiangellales	Actinobacteria	Actinobacteria	Bacteria	none	Actinobacteria	Actinobacteria	Jiangellales	Jiangellaceae	Haloactinopolyspora	Haloactinopolyspora_alba	GCA_003014555	Actinobacteria|none|Actinobacteria|Actinobacteria|Jiangellales|Jiangellaceae|Haloactinopolyspora|Haloactinopolyspora_alba|GCA_003014555	Actinobacteria|none|Actinobacteria|Actinobacteria|Jiangellales|Jiangellaceae|Haloactinopolyspora|Haloactinopolyspora_alba|GCA_003014555
GCA_000247995.2	Actinobacteria	Micrococcales	Actinobacteria	Actinobacteria	Bacteria	none	Actinobacteria	Actinobacteria	Micrococcales	Dermatophilaceae	Mobilicoccus	Mobilicoccus_pelagius	GCA_000247995	Actinobacteria|none|Actinobacteria|Actinobacteria|Micrococcales|Dermatophilaceae|Mobilicoccus|Mobilicoccus_pelagius|GCA_000247995	Actinobacteria|none|Actinobacteria|Actinobacteria|Micrococcales|Dermatophilaceae|Mobilicoccus|Mobilicoccus_pelagius|GCA_000247995
GCA_001591405.1	Actinobacteria	Micrococcales	Actinobacteria	Actinobacteria	Bacteria	none	Actinobacteria	Actinobacteria	Micrococcales	Intrasporangiaceae	Janibacter	Janibacter_terrae	GCA_001591405	Actinobacteria|none|Actinobacteria|Actinobacteria|Micrococcales|Intrasporangiaceae|Janibacter|Janibacter_terrae|GCA_001591405	Actinobacteria|none|Actinobacteria|Actinobacteria|Micrococcales|Intrasporangiaceae|Janibacter|Janibacter_terrae|GCA_001591405
GCA_000350525.1	Actinobacteria	Micrococcales	Actinobacteria	Actinobacteria	Bacteria	none	Actinobacteria	Actinobacteria	Micrococcales	Microbacteriaceae	Leucobacter	Leucobacter_salsicius	GCA_000350525	Actinobacteria|none|Actinobacteria|Actinobacteria|Micrococcales|Microbacteriaceae|Leucobacter|Leucobacter_salsicius|GCA_000350525	Actinobacteria|none|Actinobacteria|Actinobacteria|Micrococcales|Microbacteriaceae|Leucobacter|Leucobacter_salsicius|GCA_000350525
GCA_000023205.1	Actinobacteria	Micrococcales	Actinobacteria	Actinobacteria	Bacteria	none	Actinobacteria	Actinobacteria	Micrococcales	Micrococcaceae	Micrococcus	Micrococcus_luteus	GCA_000023205	Actinobacteria|none|Actinobacteria|Actinobacteria|Micrococcales|Micrococcaceae|Micrococcus|Micrococcus_luteus|GCA_000023205	Actinobacteria|none|Actinobacteria|Actinobacteria|Micrococcales|Micrococcaceae|Micrococcus|Micrococcus_luteus|GCA_000023205
GCA_001484605.1	Actinobacteria	Micrococcales	Actinobacteria	Actinobacteria	Bacteria	none	Actinobacteria	Actinobacteria	Micrococcales	Micrococcaceae	Pseudarthrobacter	Pseudarthrobacter_sulfonivorans	GCA_001484605	Actinobacteria|none|Actinobacteria|Actinobacteria|Micrococcales|Micrococcaceae|Pseudarthrobacter|Pseudarthrobacter_sulfonivorans|GCA_001484605	Actinobacteria|none|Actinobacteria|Actinobacteria|Micrococcales|Micrococcaceae|Pseudarthrobacter|Pseudarthrobacter_sulfonivorans|GCA_001484605
GCA_001636295.1	Actinobacteria	Micrococcales	Actinobacteria	Actinobacteria	Bacteria	none	Actinobacteria	Actinobacteria	Micrococcales	Promicromonosporaceae	Isoptericola	Isoptericola_dokdonensis	GCA_001636295	Actinobacteria|none|Actinobacteria|Actinobacteria|Micrococcales|Promicromonosporaceae|Isoptericola|Isoptericola_dokdonensis|GCA_001636295	Actinobacteria|none|Actinobacteria|Actinobacteria|Micrococcales|Promicromonosporaceae|Isoptericola|Isoptericola_dokdonensis|GCA_001636295
GCA_000204155.1	Actinobacteria	Micromonosporales	Actinobacteria	Actinobacteria	Bacteria	none	Actinobacteria	Actinobacteria	Micromonosporales	Micromonosporaceae	Verrucosispora	Verrucosispora_maris	GCA_000204155	Actinobacteria|none|Actinobacteria|Actinobacteria|Micromonosporales|Micromonosporaceae|Verrucosispora|Verrucosispora_maris|GCA_000204155	Actinobacteria|none|Actinobacteria|Actinobacteria|Micromonosporales|Micromonosporaceae|Verrucosispora|Verrucosispora_maris|GCA_000204155
GCA_000092645.1	Actinobacteria	Actinobacteria_unass	Actinobacteria	Actinobacteria	Bacteria	none	Actinobacteria	Actinobacteria	none	none	Thermobispora	Thermobispora_bispora	GCA_000092645	Actinobacteria|none|Actinobacteria|Actinobacteria|none|none|Thermobispora|Thermobispora_bispora|GCA_000092645	Actinobacteria|none|Actinobacteria|Actinobacteria|none|none|Thermobispora|Thermobispora_bispora|GCA_000092645
GCA_002797495.1	Actinobacteria	Propionibacteriales	Actinobacteria	Actinobacteria	Bacteria	none	Actinobacteria	Actinobacteria	Propionibacteriales	Nocardioidaceae	Mumia	Mumia_flava	GCA_002797495	Actinobacteria|none|Actinobacteria|Actinobacteria|Propionibacteriales|Nocardioidaceae|Mumia|Mumia_flava|GCA_002797495	Actinobacteria|none|Actinobacteria|Actinobacteria|Propionibacteriales|Nocardioidaceae|Mumia|Mumia_flava|GCA_002797495
GCA_001642025.1	Actinobacteria	Propionibacteriales	Actinobacteria	Actinobacteria	Bacteria	none	Actinobacteria	Actinobacteria	Propionibacteriales	Propionibacteriaceae	Cutibacterium	[Propionibacterium]_namnetense	GCA_001642025	Actinobacteria|none|Actinobacteria|Actinobacteria|Propionibacteriales|Propionibacteriaceae|Cutibacterium|[Propionibacterium]_namnetense|GCA_001642025	Actinobacteria|none|Actinobacteria|Actinobacteria|Propionibacteriales|Propionibacteriaceae|Cutibacterium|[Propionibacterium]_namnetense|GCA_001642025
GCA_000423085.1	Actinobacteria	Propionibacteriales	Actinobacteria	Actinobacteria	Bacteria	none	Actinobacteria	Actinobacteria	Propionibacteriales	Propionibacteriaceae	Granulicoccus	Granulicoccus_phenolivorans	GCA_000423085	Actinobacteria|none|Actinobacteria|Actinobacteria|Propionibacteriales|Propionibacteriaceae|Granulicoccus|Granulicoccus_phenolivorans|GCA_000423085	Actinobacteria|none|Actinobacteria|Actinobacteria|Propionibacteriales|Propionibacteriaceae|Granulicoccus|Granulicoccus_phenolivorans|GCA_000423085
GCA_000974445.1	Actinobacteria	Pseudonocardiales	Actinobacteria	Actinobacteria	Bacteria	none	Actinobacteria	Actinobacteria	Pseudonocardiales	Pseudonocardiaceae	Lechevalieria	Lechevalieria_aerocolonigenes	GCA_000974445	Actinobacteria|none|Actinobacteria|Actinobacteria|Pseudonocardiales|Pseudonocardiaceae|Lechevalieria|Lechevalieria_aerocolonigenes|GCA_000974445	Actinobacteria|none|Actinobacteria|Actinobacteria|Pseudonocardiales|Pseudonocardiaceae|Lechevalieria|Lechevalieria_aerocolonigenes|GCA_000974445
GCA_900115565.1	Actinobacteria	Pseudonocardiales	Actinobacteria	Actinobacteria	Bacteria	none	Actinobacteria	Actinobacteria	Pseudonocardiales	Pseudonocardiaceae	Yuhushiella	Yuhushiella_deserti	GCA_900115565	Actinobacteria|none|Actinobacteria|Actinobacteria|Pseudonocardiales|Pseudonocardiaceae|Yuhushiella|Yuhushiella_deserti|GCA_900115565	Actinobacteria|none|Actinobacteria|Actinobacteria|Pseudonocardiales|Pseudonocardiaceae|Yuhushiella|Yuhushiella_deserti|GCA_900115565
GCA_000269985.1	Actinobacteria	Streptomycetales	Actinobacteria	Actinobacteria	Bacteria	none	Actinobacteria	Actinobacteria	Streptomycetales	Streptomycetaceae	Kitasatospora	Kitasatospora_setae	GCA_000269985	Actinobacteria|none|Actinobacteria|Actinobacteria|Streptomycetales|Streptomycetaceae|Kitasatospora|Kitasatospora_setae|GCA_000269985	Actinobacteria|none|Actinobacteria|Actinobacteria|Streptomycetales|Streptomycetaceae|Kitasatospora|Kitasatospora_setae|GCA_000269985
GCA_003002095.1	Actinobacteria	Streptosporangiales	Actinobacteria	Actinobacteria	Bacteria	none	Actinobacteria	Actinobacteria	Streptosporangiales	none	Allonocardiopsis	Allonocardiopsis_opalescens	GCA_003002095	Actinobacteria|none|Actinobacteria|Actinobacteria|Streptosporangiales|none|Allonocardiopsis|Allonocardiopsis_opalescens|GCA_003002095	Actinobacteria|none|Actinobacteria|Actinobacteria|Streptosporangiales|none|Allonocardiopsis|Allonocardiopsis_opalescens|GCA_003002095
GCA_001653075.1	Actinobacteria	Streptosporangiales	Actinobacteria	Actinobacteria	Bacteria	none	Actinobacteria	Actinobacteria	Streptosporangiales	Streptosporangiaceae	Planomonospora	Planomonospora_sphaerica	GCA_001653075	Actinobacteria|none|Actinobacteria|Actinobacteria|Streptosporangiales|Streptosporangiaceae|Planomonospora|Planomonospora_sphaerica|GCA_001653075	Actinobacteria|none|Actinobacteria|Actinobacteria|Streptosporangiales|Streptosporangiaceae|Planomonospora|Planomonospora_sphaerica|GCA_001653075
GCA_900119385.1	Actinobacteria	Coriobacteriales	Coriobacteriia	Coriobacteriia	Bacteria	none	Actinobacteria	Coriobacteriia	Coriobacteriales	Atopobiaceae	Olsenella	Olsenella_mediterranea	GCA_900119385	Actinobacteria|none|Actinobacteria|Coriobacteriia|Coriobacteriales|Atopobiaceae|Olsenella|Olsenella_mediterranea|GCA_900119385	Coriobacteriia|none|Actinobacteria|Coriobacteriia|Coriobacteriales|Atopobiaceae|Olsenella|Olsenella_mediterranea|GCA_900119385
GCA_000270285.1	Actinobacteria	Eggerthellales	Coriobacteriia	Coriobacteriia	Bacteria	none	Actinobacteria	Coriobacteriia	Eggerthellales	Eggerthellaceae	Eggerthella	Eggerthella_sp__YY7918	GCA_000270285	Actinobacteria|none|Actinobacteria|Coriobacteriia|Eggerthellales|Eggerthellaceae|Eggerthella|Eggerthella_sp__YY7918|GCA_000270285	Coriobacteriia|none|Actinobacteria|Coriobacteriia|Eggerthellales|Eggerthellaceae|Eggerthella|Eggerthella_sp__YY7918|GCA_000270285
GCA_000025265.1	Actinobacteria	Solirubrobacterales	Thermoleophilia	Thermoleophilia	Bacteria	none	Actinobacteria	Thermoleophilia	Solirubrobacterales	Conexibacteraceae	Conexibacter	Conexibacter_woesei	GCA_000025265	Actinobacteria|none|Actinobacteria|Thermoleophilia|Solirubrobacterales|Conexibacteraceae|Conexibacter|Conexibacter_woesei|GCA_000025265	Thermoleophilia|none|Actinobacteria|Thermoleophilia|Solirubrobacterales|Conexibacteraceae|Conexibacter|Conexibacter_woesei|GCA_000025265
GCA_000010785.1	Aquificae	Aquificales	Aquificae	Aquificae	Bacteria	none	Aquificae	Aquificae	Aquificales	Aquificaceae	Hydrogenobacter	Hydrogenobacter_thermophilus	GCA_000010785	Aquificae|none|Aquificae|Aquificae|Aquificales|Aquificaceae|Hydrogenobacter|Hydrogenobacter_thermophilus|GCA_000010785	Aquificae|none|Aquificae|Aquificae|Aquificales|Aquificaceae|Hydrogenobacter|Hydrogenobacter_thermophilus|GCA_000010785
GCA_000213785.1	Aquificae	Aquificales	Aquificae	Aquificae	Bacteria	none	Aquificae	Aquificae	Aquificales	Aquificaceae	Hydrogenobaculum	Hydrogenobaculum_sp__3684	GCA_000213785	Aquificae|none|Aquificae|Aquificae|Aquificales|Aquificaceae|Hydrogenobaculum|Hydrogenobaculum_sp__3684|GCA_000213785	Aquificae|none|Aquificae|Aquificae|Aquificales|Aquificaceae|Hydrogenobaculum|Hydrogenobaculum_sp__3684|GCA_000213785
GCA_000185805.1	Aquificae	Desulfurobacteriales	Aquificae	Aquificae	Bacteria	none	Aquificae	Aquificae	Desulfurobacteriales	Desulfurobacteriaceae	Thermovibrio	Thermovibrio_ammonificans	GCA_000185805	Aquificae|none|Aquificae|Aquificae|Desulfurobacteriales|Desulfurobacteriaceae|Thermovibrio|Thermovibrio_ammonificans|GCA_000185805	Aquificae|none|Aquificae|Aquificae|Desulfurobacteriales|Desulfurobacteriaceae|Thermovibrio|Thermovibrio_ammonificans|GCA_000185805
GCA_000427095.1	Armatimonadetes	Armatimonadetes	Chthonomonadetes	Chthonomonadetes	Bacteria	none	Armatimonadetes	Chthonomonadetes	Chthonomonadales	Chthonomonadaceae	Chthonomonas	Chthonomonas_calidirosea	GCA_000427095	Armatimonadetes|none|Armatimonadetes|Chthonomonadetes|Chthonomonadales|Chthonomonadaceae|Chthonomonas|Chthonomonas_calidirosea|GCA_000427095	Chthonomonadetes|none|Armatimonadetes|Chthonomonadetes|Chthonomonadales|Chthonomonadaceae|Chthonomonas|Chthonomonas_calidirosea|GCA_000427095
GCA_000724625.1	Armatimonadetes	Armatimonadetes	Fimbriimonadia	Fimbriimonadia	Bacteria	none	Armatimonadetes	Fimbriimonadia	Fimbriimonadales	Fimbriimonadaceae	Fimbriimonas	Fimbriimonas_ginsengisoli	GCA_000724625	Armatimonadetes|none|Armatimonadetes|Fimbriimonadia|Fimbriimonadales|Fimbriimonadaceae|Fimbriimonas|Fimbriimonas_ginsengisoli|GCA_000724625	Fimbriimonadia|none|Armatimonadetes|Fimbriimonadia|Fimbriimonadales|Fimbriimonadaceae|Fimbriimonas|Fimbriimonas_ginsengisoli|GCA_000724625
GCA_900128475.1	Bacteroidetes	Bacteroidales	Bacteroidia	Bacteroidia	Bacteria	none	Bacteroidetes	Bacteroidia	Bacteroidales	Bacteroidaceae	Mediterranea	Mediterranea_massiliensis	GCA_900128475	Bacteroidetes|none|Bacteroidetes|Bacteroidia|Bacteroidales|Bacteroidaceae|Mediterranea|Mediterranea_massiliensis|GCA_900128475	Bacteroidia|none|Bacteroidetes|Bacteroidia|Bacteroidales|Bacteroidaceae|Mediterranea|Mediterranea_massiliensis|GCA_900128475
GCA_000379665.1	Bacteroidetes	Bacteroidales	Bacteroidia	Bacteroidia	Bacteria	none	Bacteroidetes	Bacteroidia	Bacteroidales	Odoribacteraceae	Butyricimonas	Butyricimonas_synergistica	GCA_000379665	Bacteroidetes|none|Bacteroidetes|Bacteroidia|Bacteroidales|Odoribacteraceae|Butyricimonas|Butyricimonas_synergistica|GCA_000379665	Bacteroidia|none|Bacteroidetes|Bacteroidia|Bacteroidales|Odoribacteraceae|Butyricimonas|Butyricimonas_synergistica|GCA_000379665
GCA_001282625.1	Bacteroidetes	Bacteroidales	Bacteroidia	Bacteroidia	Bacteria	none	Bacteroidetes	Bacteroidia	Bacteroidales	Porphyromonadaceae	Lascolabacillus	Lascolabacillus_massiliensis	GCA_001282625	Bacteroidetes|none|Bacteroidetes|Bacteroidia|Bacteroidales|Porphyromonadaceae|Lascolabacillus|Lascolabacillus_massiliensis|GCA_001282625	Bacteroidia|none|Bacteroidetes|Bacteroidia|Bacteroidales|Porphyromonadaceae|Lascolabacillus|Lascolabacillus_massiliensis|GCA_001282625
GCA_000212375.1	Bacteroidetes	Bacteroidales	Bacteroidia	Bacteroidia	Bacteria	none	Bacteroidetes	Bacteroidia	Bacteroidales	Porphyromonadaceae	Porphyromonas	Porphyromonas_asaccharolytica	GCA_000212375	Bacteroidetes|none|Bacteroidetes|Bacteroidia|Bacteroidales|Porphyromonadaceae|Porphyromonas|Porphyromonas_asaccharolytica|GCA_000212375	Bacteroidia|none|Bacteroidetes|Bacteroidia|Bacteroidales|Porphyromonadaceae|Porphyromonas|Porphyromonas_asaccharolytica|GCA_000212375
GCA_900104655.1	Bacteroidetes	Bacteroidales	Bacteroidia	Bacteroidia	Bacteria	none	Bacteroidetes	Bacteroidia	Bacteroidales	Rikenellaceae	Millionella	Millionella_massiliensis	GCA_900104655	Bacteroidetes|none|Bacteroidetes|Bacteroidia|Bacteroidales|Rikenellaceae|Millionella|Millionella_massiliensis|GCA_900104655	Bacteroidia|none|Bacteroidetes|Bacteroidia|Bacteroidales|Rikenellaceae|Millionella|Millionella_massiliensis|GCA_900104655
GCA_000949475.1	Bacteroidetes	Marinilabiliales	Bacteroidia	Bacteroidia	Bacteria	none	Bacteroidetes	Bacteroidia	Marinilabiliales	Prolixibacteraceae	Draconibacterium	Draconibacterium_sediminis	GCA_000949475	Bacteroidetes|none|Bacteroidetes|Bacteroidia|Marinilabiliales|Prolixibacteraceae|Draconibacterium|Draconibacterium_sediminis|GCA_000949475	Bacteroidia|none|Bacteroidetes|Bacteroidia|Marinilabiliales|Prolixibacteraceae|Draconibacterium|Draconibacterium_sediminis|GCA_000949475
GCA_002973575.1	Bacteroidetes	Chitinophagales	Chitinophagia	Chitinophagia	Bacteria	none	Bacteroidetes	Chitinophagia	Chitinophagales	Chitinophagaceae	Vibrionimonas	Vibrionimonas_magnilacihabitans	GCA_002973575	Bacteroidetes|none|Bacteroidetes|Chitinophagia|Chitinophagales|Chitinophagaceae|Vibrionimonas|Vibrionimonas_magnilacihabitans|GCA_002973575	Chitinophagia|none|Bacteroidetes|Chitinophagia|Chitinophagales|Chitinophagaceae|Vibrionimonas|Vibrionimonas_magnilacihabitans|GCA_002973575
GCA_900176595.1	Bacteroidetes	Cytophagales	Cytophagia	Cytophagia	Bacteria	none	Bacteroidetes	Cytophagia	Cytophagales	Cyclobacteriaceae	Aquiflexum	Aquiflexum_balticum	GCA_900176595	Bacteroidetes|none|Bacteroidetes|Cytophagia|Cytophagales|Cyclobacteriaceae|Aquiflexum|Aquiflexum_balticum|GCA_900176595	Cytophagia|none|Bacteroidetes|Cytophagia|Cytophagales|Cyclobacteriaceae|Aquiflexum|Aquiflexum_balticum|GCA_900176595
GCA_001870735.1	Bacteroidetes	Cytophagales	Cytophagia	Cytophagia	Bacteria	none	Bacteroidetes	Cytophagia	Cytophagales	Cytophagaceae	Arsenicibacter	Arsenicibacter_rosenii	GCA_001870735	Bacteroidetes|none|Bacteroidetes|Cytophagia|Cytophagales|Cytophagaceae|Arsenicibacter|Arsenicibacter_rosenii|GCA_001870735	Cytophagia|none|Bacteroidetes|Cytophagia|Cytophagales|Cytophagaceae|Arsenicibacter|Arsenicibacter_rosenii|GCA_001870735
GCA_000379725.1	Bacteroidetes	Cytophagales	Cytophagia	Cytophagia	Bacteria	none	Bacteroidetes	Cytophagia	Cytophagales	Cytophagaceae	Cytophaga	Cytophaga_aurantiaca	GCA_000379725	Bacteroidetes|none|Bacteroidetes|Cytophagia|Cytophagales|Cytophagaceae|Cytophaga|Cytophaga_aurantiaca|GCA_000379725	Cytophagia|none|Bacteroidetes|Cytophagia|Cytophagales|Cytophagaceae|Cytophaga|Cytophaga_aurantiaca|GCA_000379725
GCA_900167975.1	Bacteroidetes	Cytophagales	Cytophagia	Cytophagia	Bacteria	none	Bacteroidetes	Cytophagia	Cytophagales	Cytophagaceae	Ohtaekwangia	Ohtaekwangia_koreensis	GCA_900167975	Bacteroidetes|none|Bacteroidetes|Cytophagia|Cytophagales|Cytophagaceae|Ohtaekwangia|Ohtaekwangia_koreensis|GCA_900167975	Cytophagia|none|Bacteroidetes|Cytophagia|Cytophagales|Cytophagaceae|Ohtaekwangia|Ohtaekwangia_koreensis|GCA_900167975
GCA_001661595.2	Bacteroidetes	Flavobacteriales	Flavobacteriia	Flavobacteriia	Bacteria	none	Bacteroidetes	Flavobacteriia	Flavobacteriales	Crocinitomicaceae	Crocinitomix	Crocinitomix_algicola	GCA_001661595	Bacteroidetes|none|Bacteroidetes|Flavobacteriia|Flavobacteriales|Crocinitomicaceae|Crocinitomix|Crocinitomix_algicola|GCA_001661595	Flavobacteriia|none|Bacteroidetes|Flavobacteriia|Flavobacteriales|Crocinitomicaceae|Crocinitomix|Crocinitomix_algicola|GCA_001661595
GCA_001747085.1	Bacteroidetes	Flavobacteriales	Flavobacteriia	Flavobacteriia	Bacteria	none	Bacteroidetes	Flavobacteriia	Flavobacteriales	Flavobacteriaceae	Algibacter	Algibacter_aquaticus	GCA_001747085	Bacteroidetes|none|Bacteroidetes|Flavobacteriia|Flavobacteriales|Flavobacteriaceae|Algibacter|Algibacter_aquaticus|GCA_001747085	Flavobacteriia|none|Bacteroidetes|Flavobacteriia|Flavobacteriales|Flavobacteriaceae|Algibacter|Algibacter_aquaticus|GCA_001747085
GCA_000520955.1	Bacteroidetes	Flavobacteriales	Flavobacteriia	Flavobacteriia	Bacteria	none	Bacteroidetes	Flavobacteriia	Flavobacteriales	Flavobacteriaceae	Aquimarina	Aquimarina_pacifica	GCA_000520955	Bacteroidetes|none|Bacteroidetes|Flavobacteriia|Flavobacteriales|Flavobacteriaceae|Aquimarina|Aquimarina_pacifica|GCA_000520955	Flavobacteriia|none|Bacteroidetes|Flavobacteriia|Flavobacteriales|Flavobacteriaceae|Aquimarina|Aquimarina_pacifica|GCA_000520955
GCA_002234495.1	Bacteroidetes	Flavobacteriales	Flavobacteriia	Flavobacteriia	Bacteria	none	Bacteroidetes	Flavobacteriia	Flavobacteriales	Flavobacteriaceae	Arenibacter	Arenibacter_algicola	GCA_002234495	Bacteroidetes|none|Bacteroidetes|Flavobacteriia|Flavobacteriales|Flavobacteriaceae|Arenibacter|Arenibacter_algicola|GCA_002234495	Flavobacteriia|none|Bacteroidetes|Flavobacteriia|Flavobacteriales|Flavobacteriaceae|Arenibacter|Arenibacter_algicola|GCA_002234495
GCA_001420285.1	Bacteroidetes	Flavobacteriales	Flavobacteriia	Flavobacteriia	Bacteria	none	Bacteroidetes	Flavobacteriia	Flavobacteriales	Flavobacteriaceae	Chryseobacterium	Chryseobacterium_aquaticum	GCA_001420285	Bacteroidetes|none|Bacteroidetes|Flavobacteriia|Flavobacteriales|Flavobacteriaceae|Chryseobacterium|Chryseobacterium_aquaticum|GCA_001420285	Flavobacteriia|none|Bacteroidetes|Flavobacteriia|Flavobacteriales|Flavobacteriaceae|Chryseobacterium|Chryseobacterium_aquaticum|GCA_001420285
GCA_000382425.1	Bacteroidetes	Flavobacteriales	Flavobacteriia	Flavobacteriia	Bacteria	none	Bacteroidetes	Flavobacteriia	Flavobacteriales	Flavobacteriaceae	Empedobacter	Empedobacter_brevis	GCA_000382425	Bacteroidetes|none|Bacteroidetes|Flavobacteriia|Flavobacteriales|Flavobacteriaceae|Empedobacter|Empedobacter_brevis|GCA_000382425	Flavobacteriia|none|Bacteroidetes|Flavobacteriia|Flavobacteriales|Flavobacteriaceae|Empedobacter|Empedobacter_brevis|GCA_000382425
GCA_000423005.1	Bacteroidetes	Flavobacteriales	Flavobacteriia	Flavobacteriia	Bacteria	none	Bacteroidetes	Flavobacteriia	Flavobacteriales	Flavobacteriaceae	Gelidibacter	Gelidibacter_mesophilus	GCA_000423005	Bacteroidetes|none|Bacteroidetes|Flavobacteriia|Flavobacteriales|Flavobacteriaceae|Gelidibacter|Gelidibacter_mesophilus|GCA_000423005	Flavobacteriia|none|Bacteroidetes|Flavobacteriia|Flavobacteriales|Flavobacteriaceae|Gelidibacter|Gelidibacter_mesophilus|GCA_000423005
GCA_000260115.1	Bacteroidetes	Flavobacteriales	Flavobacteriia	Flavobacteriia	Bacteria	none	Bacteroidetes	Flavobacteriia	Flavobacteriales	Flavobacteriaceae	Joostella	Joostella_marina	GCA_000260115	Bacteroidetes|none|Bacteroidetes|Flavobacteriia|Flavobacteriales|Flavobacteriaceae|Joostella|Joostella_marina|GCA_000260115	Flavobacteriia|none|Bacteroidetes|Flavobacteriia|Flavobacteriales|Flavobacteriaceae|Joostella|Joostella_marina|GCA_000260115
GCA_000220525.2	Bacteroidetes	Flavobacteriales	Flavobacteriia	Flavobacteriia	Bacteria	none	Bacteroidetes	Flavobacteriia	Flavobacteriales	Flavobacteriaceae	Ochrovirga	Ochrovirga_pacifica	GCA_000220525	Bacteroidetes|none|Bacteroidetes|Flavobacteriia|Flavobacteriales|Flavobacteriaceae|Ochrovirga|Ochrovirga_pacifica|GCA_000220525	Flavobacteriia|none|Bacteroidetes|Flavobacteriia|Flavobacteriales|Flavobacteriaceae|Ochrovirga|Ochrovirga_pacifica|GCA_000220525
GCA_000024125.1	Bacteroidetes	Flavobacteriales	Flavobacteriia	Flavobacteriia	Bacteria	none	Bacteroidetes	Flavobacteriia	Flavobacteriales	Flavobacteriaceae	Robiginitalea	Robiginitalea_biformata	GCA_000024125	Bacteroidetes|none|Bacteroidetes|Flavobacteriia|Flavobacteriales|Flavobacteriaceae|Robiginitalea|Robiginitalea_biformata|GCA_000024125	Flavobacteriia|none|Bacteroidetes|Flavobacteriia|Flavobacteriales|Flavobacteriaceae|Robiginitalea|Robiginitalea_biformata|GCA_000024125
GCA_900119185.1	Bacteroidetes	Flavobacteriales	Flavobacteriia	Flavobacteriia	Bacteria	none	Bacteroidetes	Flavobacteriia	Flavobacteriales	Flavobacteriaceae	Sinomicrobium	Sinomicrobium_oceani	GCA_900119185	Bacteroidetes|none|Bacteroidetes|Flavobacteriia|Flavobacteriales|Flavobacteriaceae|Sinomicrobium|Sinomicrobium_oceani|GCA_900119185	Flavobacteriia|none|Bacteroidetes|Flavobacteriia|Flavobacteriales|Flavobacteriaceae|Sinomicrobium|Sinomicrobium_oceani|GCA_900119185
GCA_900109575.1	Bacteroidetes	Sphingobacteriales	Sphingobacteriia	Sphingobacteriia	Bacteria	none	Bacteroidetes	Sphingobacteriia	Sphingobacteriales	Sphingobacteriaceae	Pseudosphingobacterium	Pseudosphingobacterium_domesticum	GCA_900109575	Bacteroidetes|none|Bacteroidetes|Sphingobacteriia|Sphingobacteriales|Sphingobacteriaceae|Pseudosphingobacterium|Pseudosphingobacterium_domesticum|GCA_900109575	Sphingobacteriia|none|Bacteroidetes|Sphingobacteriia|Sphingobacteriales|Sphingobacteriaceae|Pseudosphingobacterium|Pseudosphingobacterium_domesticum|GCA_900109575
GCA_001715195.1	Balneolaeota	Balneolales	Balneolia	Balneolia	Bacteria	none	Balneolaeota	Balneolia	Balneolales	Balneolaceae	Rhodohalobacter	Rhodohalobacter_halophilus	GCA_001715195	Balneolaeota|none|Balneolaeota|Balneolia|Balneolales|Balneolaceae|Rhodohalobacter|Rhodohalobacter_halophilus|GCA_001715195	Balneolia|none|Balneolaeota|Balneolia|Balneolales|Balneolaceae|Rhodohalobacter|Rhodohalobacter_halophilus|GCA_001715195
GCA_000284335.1	Caldiserica	Caldiserica	Caldisericia	Caldisericia	Bacteria	none	Caldiserica	Caldisericia	Caldisericales	Caldisericaceae	Caldisericum	Caldisericum_exile	GCA_000284335	Caldiserica|none|Caldiserica|Caldisericia|Caldisericales|Caldisericaceae|Caldisericum|Caldisericum_exile|GCA_000284335	Caldisericia|none|Caldiserica|Caldisericia|Caldisericales|Caldisericaceae|Caldisericum|Caldisericum_exile|GCA_000284335
GCA_003162415.1	candidate_division_AD3	candidate_division_AD3	none	candidate_division_AD3	Bacteria	none	candidate_division_AD3	none	none	none	none	candidate_division_AD3_bacterium	GCA_003162415	candidate_division_AD3|none|candidate_division_AD3|none|none|none|none|candidate_division_AD3_bacterium|GCA_003162415	candidate_division_AD3|none|candidate_division_AD3|none|none|none|none|candidate_division_AD3_bacterium|GCA_003162415
GCA_002084955.1	candidate_division_CPR3	candidate_division_CPR3	none	candidate_division_CPR3	Bacteria	none	candidate_division_CPR3	none	none	none	none	candidate_division_CPR3_bacterium_4484_211	GCA_002084955	candidate_division_CPR3|none|candidate_division_CPR3|none|none|none|none|candidate_division_CPR3_bacterium_4484_211|GCA_002084955	candidate_division_CPR3|none|candidate_division_CPR3|none|none|none|none|candidate_division_CPR3_bacterium_4484_211|GCA_002084955
GCA_000996275.1	candidate_division_TM6	candidate_division_TM6	none	candidate_division_TM6	Bacteria	none	candidate_division_TM6	none	none	none	none	candidate_division_TM6_bacterium_GW2011_GWE2_42_60	GCA_000996275	candidate_division_TM6|none|candidate_division_TM6|none|none|none|none|candidate_division_TM6_bacterium_GW2011_GWE2_42_60|GCA_000996275	candidate_division_TM6|none|candidate_division_TM6|none|none|none|none|candidate_division_TM6_bacterium_GW2011_GWE2_42_60|GCA_000996275
GCA_000989525.1	candidate_division_TM6	candidate_division_TM6	none	candidate_division_TM6	Bacteria	none	candidate_division_TM6	none	none	none	none	candidate_division_TM6_bacterium_GW2011_GWF2_32_72	GCA_000989525	candidate_division_TM6|none|candidate_division_TM6|none|none|none|none|candidate_division_TM6_bacterium_GW2011_GWF2_32_72|GCA_000989525	candidate_division_TM6|none|candidate_division_TM6|none|none|none|none|candidate_division_TM6_bacterium_GW2011_GWF2_32_72|GCA_000989525
GCA_002316275.1	candidate_division_WOR-3	candidate_division_WOR-3	none	candidate_division_WOR-3	Bacteria	none	candidate_division_WOR-3	none	none	none	none	candidate_division_WOR-3_bacterium_UBA1063	GCA_002316275	candidate_division_WOR-3|none|candidate_division_WOR-3|none|none|none|none|candidate_division_WOR-3_bacterium_UBA1063|GCA_002316275	candidate_division_WOR-3|none|candidate_division_WOR-3|none|none|none|none|candidate_division_WOR-3_bacterium_UBA1063|GCA_002316275
GCA_003243975.1	candidate_division_WPS-2	candidate_division_WPS-2	none	candidate_division_WPS-2	Bacteria	none	candidate_division_WPS-2	none	none	none	none	candidate_division_WPS-2_bacterium	GCA_003243975	candidate_division_WPS-2|none|candidate_division_WPS-2|none|none|none|none|candidate_division_WPS-2_bacterium|GCA_003243975	candidate_division_WPS-2|none|candidate_division_WPS-2|none|none|none|none|candidate_division_WPS-2_bacterium|GCA_003243975
GCA_000447245.1	candidate_division_Zixibacteria	candidate_division_Zixibacteria	none	candidate_division_Zixibacteria	Bacteria	none	candidate_division_Zixibacteria	none	none	none	none	candidate_division_Zixibacteria_bacterium_RBG-1	GCA_000447245	candidate_division_Zixibacteria|none|candidate_division_Zixibacteria|none|none|none|none|candidate_division_Zixibacteria_bacterium_RBG-1|GCA_000447245	candidate_division_Zixibacteria|none|candidate_division_Zixibacteria|none|none|none|none|candidate_division_Zixibacteria_bacterium_RBG-1|GCA_000447245
GCA_001773575.1	Candidatus_Adlerbacteria	Candidatus_Adlerbacteria	none	Candidatus_Adlerbacteria	Bacteria	none	Candidatus_Adlerbacteria	none	none	none	none	Candidatus_Adlerbacteria_bacterium_RIFOXYC1_FULL_48_26	GCA_001773575	Candidatus_Adlerbacteria|none|Candidatus_Adlerbacteria|none|none|none|none|Candidatus_Adlerbacteria_bacterium_RIFOXYC1_FULL_48_26|GCA_001773575	Candidatus_Adlerbacteria|none|Candidatus_Adlerbacteria|none|none|none|none|Candidatus_Adlerbacteria_bacterium_RIFOXYC1_FULL_48_26|GCA_001773575
GCA_000493965.1	Candidatus_Aminicenantes	Candidatus_Aminicenantes	none	Candidatus_Aminicenantes	Bacteria	none	Candidatus_Aminicenantes	none	none	none	Candidatus_Aminicenans	Candidatus_Aminicenans_sakinawicola	GCA_000493965	Candidatus_Aminicenantes|none|Candidatus_Aminicenantes|none|none|none|Candidatus_Aminicenans|Candidatus_Aminicenans_sakinawicola|GCA_000493965	Candidatus_Aminicenantes|none|Candidatus_Aminicenantes|none|none|none|Candidatus_Aminicenans|Candidatus_Aminicenans_sakinawicola|GCA_000493965
GCA_001817055.1	Candidatus_Andersenbacteria	Candidatus_Andersenbacteria	none	Candidatus_Andersenbacteria	Bacteria	none	Candidatus_Andersenbacteria	none	none	none	none	Candidatus_Andersenbacteria_bacterium_RIFCSPHIGHO2_02_FULL_45_11	GCA_001817055	Candidatus_Andersenbacteria|none|Candidatus_Andersenbacteria|none|none|none|none|Candidatus_Andersenbacteria_bacterium_RIFCSPHIGHO2_02_FULL_45_11|GCA_001817055	Candidatus_Andersenbacteria|none|Candidatus_Andersenbacteria|none|none|none|none|Candidatus_Andersenbacteria_bacterium_RIFCSPHIGHO2_02_FULL_45_11|GCA_001817055
GCA_900465355.1	Candidatus_Bipolaricaulota	Candidatus_Bipolaricaulota	none	Candidatus_Bipolaricaulota	Bacteria	none	Candidatus_Bipolaricaulota	none	none	none	Candidatus_Bipolaricaulis	Candidatus_Bipolaricaulis_anaerobius	GCA_900465355	Candidatus_Bipolaricaulota|none|Candidatus_Bipolaricaulota|none|none|none|Candidatus_Bipolaricaulis|Candidatus_Bipolaricaulis_anaerobius|GCA_900465355	Candidatus_Bipolaricaulota|none|Candidatus_Bipolaricaulota|none|none|none|Candidatus_Bipolaricaulis|Candidatus_Bipolaricaulis_anaerobius|GCA_900465355
GCA_001817235.1	Candidatus_Brennerbacteria	Candidatus_Brennerbacteria	none	Candidatus_Brennerbacteria	Bacteria	none	Candidatus_Brennerbacteria	none	none	none	none	Candidatus_Brennerbacteria_bacterium_RIFOXYD1_FULL_41_16	GCA_001817235	Candidatus_Brennerbacteria|none|Candidatus_Brennerbacteria|none|none|none|none|Candidatus_Brennerbacteria_bacterium_RIFOXYD1_FULL_41_16|GCA_001817235	Candidatus_Brennerbacteria|none|Candidatus_Brennerbacteria|none|none|none|none|Candidatus_Brennerbacteria_bacterium_RIFOXYD1_FULL_41_16|GCA_001817235
GCA_002773845.1	Candidatus_Buchananbacteria	Candidatus_Buchananbacteria	none	Candidatus_Buchananbacteria	Bacteria	none	Candidatus_Buchananbacteria	none	none	none	none	Candidatus_Buchananbacteria_bacterium_CG10_big_fil_rev_8_21_14_0_10_42_9	GCA_002773845	Candidatus_Buchananbacteria|none|Candidatus_Buchananbacteria|none|none|none|none|Candidatus_Buchananbacteria_bacterium_CG10_big_fil_rev_8_21_14_0_10_42_9|GCA_002773845	Candidatus_Buchananbacteria|none|Candidatus_Buchananbacteria|none|none|none|none|Candidatus_Buchananbacteria_bacterium_CG10_big_fil_rev_8_21_14_0_10_42_9|GCA_002773845
GCA_000403075.1	Candidatus_Calescamantes	Candidatus_Calescamantes	none	Candidatus_Calescamantes	Bacteria	none	Candidatus_Calescamantes	none	none	none	none	Calescamantes_bacterium_SCGC_AAA471-M6	GCA_000403075	Candidatus_Calescamantes|none|Candidatus_Calescamantes|none|none|none|none|Calescamantes_bacterium_SCGC_AAA471-M6|GCA_000403075	Candidatus_Calescamantes|none|Candidatus_Calescamantes|none|none|none|none|Calescamantes_bacterium_SCGC_AAA471-M6|GCA_000403075
GCA_000146065.1	Candidatus_Cloacimonetes	Candidatus_Cloacimonetes	none	Candidatus_Cloacimonetes	Bacteria	none	Candidatus_Cloacimonetes	none	none	none	Candidatus_Cloacimonas	Candidatus_Cloacimonas_acidaminovorans	GCA_000146065	Candidatus_Cloacimonetes|none|Candidatus_Cloacimonetes|none|none|none|Candidatus_Cloacimonas|Candidatus_Cloacimonas_acidaminovorans|GCA_000146065	Candidatus_Cloacimonetes|none|Candidatus_Cloacimonetes|none|none|none|Candidatus_Cloacimonas|Candidatus_Cloacimonas_acidaminovorans|GCA_000146065
GCA_001776545.1	Candidatus_Curtissbacteria	Candidatus_Curtissbacteria	none	Candidatus_Curtissbacteria	Bacteria	none	Candidatus_Curtissbacteria	none	none	none	none	Candidatus_Curtissbacteria_bacterium_RIFCSPLOWO2_12_FULL_41_16	GCA_001776545	Candidatus_Curtissbacteria|none|Candidatus_Curtissbacteria|none|none|none|none|Candidatus_Curtissbacteria_bacterium_RIFCSPLOWO2_12_FULL_41_16|GCA_001776545	Candidatus_Curtissbacteria|none|Candidatus_Curtissbacteria|none|none|none|none|Candidatus_Curtissbacteria_bacterium_RIFCSPLOWO2_12_FULL_41_16|GCA_001776545
GCA_001873945.1	Candidatus_Desantisbacteria	Candidatus_Desantisbacteria	none	Candidatus_Desantisbacteria	Bacteria	none	Candidatus_Desantisbacteria	none	none	none	none	Candidatus_Desantisbacteria_bacterium_CG2_30_40_21	GCA_001873945	Candidatus_Desantisbacteria|none|Candidatus_Desantisbacteria|none|none|none|none|Candidatus_Desantisbacteria_bacterium_CG2_30_40_21|GCA_001873945	Candidatus_Desantisbacteria|none|Candidatus_Desantisbacteria|none|none|none|none|Candidatus_Desantisbacteria_bacterium_CG2_30_40_21|GCA_001873945
GCA_001780165.1	Candidatus_Eisenbacteria	Candidatus_Eisenbacteria	none	Candidatus_Eisenbacteria	Bacteria	none	Candidatus_Eisenbacteria	none	none	none	none	Candidatus_Eisenbacteria_bacterium_RBG_16_71_46	GCA_001780165	Candidatus_Eisenbacteria|none|Candidatus_Eisenbacteria|none|none|none|none|Candidatus_Eisenbacteria_bacterium_RBG_16_71_46|GCA_001780165	Candidatus_Eisenbacteria|none|Candidatus_Eisenbacteria|none|none|none|none|Candidatus_Eisenbacteria_bacterium_RBG_16_71_46|GCA_001780165
GCA_001618605.1	Candidatus_Fermentibacteria	Candidatus_Fermentibacteria	Candidatus_Fermentibacteria	Candidatus_Fermentibacteria	Bacteria	none	Candidatus_Fermentibacteria	Candidatus_Fermentibacteria	Candidatus_Fermentibacterales	Candidatus_Fermentibacteraceae	Candidatus_Fermentibacter	Candidatus_Fermentibacter_daniensis	GCA_001618605	Candidatus_Fermentibacteria|none|Candidatus_Fermentibacteria|Candidatus_Fermentibacteria|Candidatus_Fermentibacterales|Candidatus_Fermentibacteraceae|Candidatus_Fermentibacter|Candidatus_Fermentibacter_daniensis|GCA_001618605	Candidatus_Fermentibacteria|none|Candidatus_Fermentibacteria|Candidatus_Fermentibacteria|Candidatus_Fermentibacterales|Candidatus_Fermentibacteraceae|Candidatus_Fermentibacter|Candidatus_Fermentibacter_daniensis|GCA_001618605
GCA_002436025.1	Candidatus_Fermentibacteria	Candidatus_Fermentibacteria	none	Candidatus_Fermentibacteria	Bacteria	none	Candidatus_Fermentibacteria	none	none	none	none	candidate_division_Hyd24-12_bacterium_UBA6080	GCA_002436025	Candidatus_Fermentibacteria|none|Candidatus_Fermentibacteria|none|none|none|none|candidate_division_Hyd24-12_bacterium_UBA6080|GCA_002436025	Candidatus_Fermentibacteria|none|Candidatus_Fermentibacteria|none|none|none|none|candidate_division_Hyd24-12_bacterium_UBA6080|GCA_002436025
GCA_001778375.1	Candidatus_Firestonebacteria	Candidatus_Firestonebacteria	none	Candidatus_Firestonebacteria	Bacteria	none	Candidatus_Firestonebacteria	none	none	none	none	Candidatus_Firestonebacteria_bacterium_RIFOXYD2_FULL_39_29	GCA_001778375	Candidatus_Firestonebacteria|none|Candidatus_Firestonebacteria|none|none|none|none|Candidatus_Firestonebacteria_bacterium_RIFOXYD2_FULL_39_29|GCA_001778375	Candidatus_Firestonebacteria|none|Candidatus_Firestonebacteria|none|none|none|none|Candidatus_Firestonebacteria_bacterium_RIFOXYD2_FULL_39_29|GCA_001778375
GCA_001778395.1	Candidatus_Giovannonibacteria	Candidatus_Giovannonibacteria	none	Candidatus_Giovannonibacteria	Bacteria	none	Candidatus_Giovannonibacteria	none	none	none	none	Candidatus_Giovannonibacteria_bacterium_GWA2_45_15	GCA_001778395	Candidatus_Giovannonibacteria|none|Candidatus_Giovannonibacteria|none|none|none|none|Candidatus_Giovannonibacteria_bacterium_GWA2_45_15|GCA_001778395	Candidatus_Giovannonibacteria|none|Candidatus_Giovannonibacteria|none|none|none|none|Candidatus_Giovannonibacteria_bacterium_GWA2_45_15|GCA_001778395
GCA_001780825.1	Candidatus_Glassbacteria	Candidatus_Glassbacteria	none	Candidatus_Glassbacteria	Bacteria	none	Candidatus_Glassbacteria	none	none	none	none	Candidatus_Glassbacteria_bacterium_RIFCSPLOWO2_12_FULL_58_11	GCA_001780825	Candidatus_Glassbacteria|none|Candidatus_Glassbacteria|none|none|none|none|Candidatus_Glassbacteria_bacterium_RIFCSPLOWO2_12_FULL_58_11|GCA_001780825	Candidatus_Glassbacteria|none|Candidatus_Glassbacteria|none|none|none|none|Candidatus_Glassbacteria_bacterium_RIFCSPLOWO2_12_FULL_58_11|GCA_001780825
GCA_002786835.1	Candidatus_Gracilibacteria	Candidatus_Gracilibacteria	none	Candidatus_Gracilibacteria	Bacteria	none	Candidatus_Gracilibacteria	none	none	none	none	Candidatus_Gracilibacteria_bacterium_CG18_big_fil_WC_8_21_14_2_50_38_16	GCA_002786835	Candidatus_Gracilibacteria|none|Candidatus_Gracilibacteria|none|none|none|none|Candidatus_Gracilibacteria_bacterium_CG18_big_fil_WC_8_21_14_2_50_38_16|GCA_002786835	Candidatus_Gracilibacteria|none|Candidatus_Gracilibacteria|none|none|none|none|Candidatus_Gracilibacteria_bacterium_CG18_big_fil_WC_8_21_14_2_50_38_16|GCA_002786835
GCA_002779425.1	Candidatus_Gribaldobacteria	Candidatus_Gribaldobacteria	none	Candidatus_Gribaldobacteria	Bacteria	none	Candidatus_Gribaldobacteria	none	none	none	none	bacterium_Candidatus_Gribaldobacteria_CG07_land_8_20_14_0_80_33_18	GCA_002779425	Candidatus_Gribaldobacteria|none|Candidatus_Gribaldobacteria|none|none|none|none|bacterium_Candidatus_Gribaldobacteria_CG07_land_8_20_14_0_80_33_18|GCA_002779425	Candidatus_Gribaldobacteria|none|Candidatus_Gribaldobacteria|none|none|none|none|bacterium_Candidatus_Gribaldobacteria_CG07_land_8_20_14_0_80_33_18|GCA_002779425
GCA_002422525.1	Candidatus_Hydrogenedentes	Candidatus_Hydrogenedentes	none	Candidatus_Hydrogenedentes	Bacteria	none	Candidatus_Hydrogenedentes	none	none	none	none	Candidatus_Hydrogenedentes_bacterium_UBA6118	GCA_002422525	Candidatus_Hydrogenedentes|none|Candidatus_Hydrogenedentes|none|none|none|none|Candidatus_Hydrogenedentes_bacterium_UBA6118|GCA_002422525	Candidatus_Hydrogenedentes|none|Candidatus_Hydrogenedentes|none|none|none|none|Candidatus_Hydrogenedentes_bacterium_UBA6118|GCA_002422525
GCA_002011615.1	Candidatus_Hydrothermae	Candidatus_Hydrothermae	none	Candidatus_Hydrothermae	Bacteria	none	Candidatus_Hydrothermae	none	none	none	none	Candidatus_Hydrothermae_bacterium_JdFR-72	GCA_002011615	Candidatus_Hydrothermae|none|Candidatus_Hydrothermae|none|none|none|none|Candidatus_Hydrothermae_bacterium_JdFR-72|GCA_002011615	Candidatus_Hydrothermae|none|Candidatus_Hydrothermae|none|none|none|none|Candidatus_Hydrothermae_bacterium_JdFR-72|GCA_002011615
GCA_001003475.1	Candidatus_Jorgensenbacteria	Candidatus_Jorgensenbacteria	none	Candidatus_Jorgensenbacteria	Bacteria	none	Candidatus_Jorgensenbacteria	none	none	none	none	Candidatus_Jorgensenbacteria_bacterium_GW2011_GWA1_48_11	GCA_001003475	Candidatus_Jorgensenbacteria|none|Candidatus_Jorgensenbacteria|none|none|none|none|Candidatus_Jorgensenbacteria_bacterium_GW2011_GWA1_48_11|GCA_001003475	Candidatus_Jorgensenbacteria|none|Candidatus_Jorgensenbacteria|none|none|none|none|Candidatus_Jorgensenbacteria_bacterium_GW2011_GWA1_48_11|GCA_001003475
GCA_001783525.1	Candidatus_Kaiserbacteria	Candidatus_Kaiserbacteria	none	Candidatus_Kaiserbacteria	Bacteria	none	Candidatus_Kaiserbacteria	none	none	none	none	Candidatus_Kaiserbacteria_bacterium_RIFOXYB1_FULL_46_14	GCA_001783525	Candidatus_Kaiserbacteria|none|Candidatus_Kaiserbacteria|none|none|none|none|Candidatus_Kaiserbacteria_bacterium_RIFOXYB1_FULL_46_14|GCA_001783525	Candidatus_Kaiserbacteria|none|Candidatus_Kaiserbacteria|none|none|none|none|Candidatus_Kaiserbacteria_bacterium_RIFOXYB1_FULL_46_14|GCA_001783525
GCA_001818495.1	Candidatus_Komeilibacteria	Candidatus_Komeilibacteria	none	Candidatus_Komeilibacteria	Bacteria	none	Candidatus_Komeilibacteria	none	none	none	none	Candidatus_Komeilibacteria_bacterium_RIFOXYD1_FULL_37_29	GCA_001818495	Candidatus_Komeilibacteria|none|Candidatus_Komeilibacteria|none|none|none|none|Candidatus_Komeilibacteria_bacterium_RIFOXYD1_FULL_37_29|GCA_001818495	Candidatus_Komeilibacteria|none|Candidatus_Komeilibacteria|none|none|none|none|Candidatus_Komeilibacteria_bacterium_RIFOXYD1_FULL_37_29|GCA_001818495
GCA_001536145.1	Candidatus_Kryptonia	Candidatus_Kryptonia	none	Candidatus_Kryptonia	Bacteria	none	Candidatus_Kryptonia	none	none	none	Candidatus_Kryptonium	Candidatus_Kryptonium_thompsoni	GCA_001536145	Candidatus_Kryptonia|none|Candidatus_Kryptonia|none|none|none|Candidatus_Kryptonium|Candidatus_Kryptonium_thompsoni|GCA_001536145	Candidatus_Kryptonia|none|Candidatus_Kryptonia|none|none|none|Candidatus_Kryptonium|Candidatus_Kryptonium_thompsoni|GCA_001536145
GCA_001442855.1	Candidatus_Kryptonia	Candidatus_Kryptonia	none	Candidatus_Kryptonia	Bacteria	none	Candidatus_Kryptonia	none	none	none	Candidatus_Thermokryptus	Candidatus_Thermokryptus_mobilis	GCA_001442855	Candidatus_Kryptonia|none|Candidatus_Kryptonia|none|none|none|Candidatus_Thermokryptus|Candidatus_Thermokryptus_mobilis|GCA_001442855	Candidatus_Kryptonia|none|Candidatus_Kryptonia|none|none|none|Candidatus_Thermokryptus|Candidatus_Thermokryptus_mobilis|GCA_001442855
GCA_002433075.1	Candidatus_Latescibacteria	Candidatus_Latescibacteria	none	Candidatus_Latescibacteria	Bacteria	none	Candidatus_Latescibacteria	none	none	none	none	Latescibacteria_bacterium_UBA6620	GCA_002433075	Candidatus_Latescibacteria|none|Candidatus_Latescibacteria|none|none|none|none|Latescibacteria_bacterium_UBA6620|GCA_002433075	Candidatus_Latescibacteria|none|Candidatus_Latescibacteria|none|none|none|none|Latescibacteria_bacterium_UBA6620|GCA_002433075
GCA_001871445.1	Candidatus_Magasanikbacteria	Candidatus_Magasanikbacteria	none	Candidatus_Magasanikbacteria	Bacteria	none	Candidatus_Magasanikbacteria	none	none	none	none	Candidatus_Magasanikbacteria_bacterium_CG1_02_41_34	GCA_001871445	Candidatus_Magasanikbacteria|none|Candidatus_Magasanikbacteria|none|none|none|none|Candidatus_Magasanikbacteria_bacterium_CG1_02_41_34|GCA_001871445	Candidatus_Magasanikbacteria|none|Candidatus_Magasanikbacteria|none|none|none|none|Candidatus_Magasanikbacteria_bacterium_CG1_02_41_34|GCA_001871445
GCA_003265975.1	Candidatus_Margulisbacteria	Candidatus_Margulisbacteria	Candidatus_Marinamargulisbacteria	Candidatus_Marinamargulisbacteria	Bacteria	none	Candidatus_Margulisbacteria	Candidatus_Marinamargulisbacteria	none	none	none	Candidatus_Marinamargulisbacteria_bacterium_SCGC_AAA071-K20	GCA_003265975	Candidatus_Margulisbacteria|none|Candidatus_Margulisbacteria|Candidatus_Marinamargulisbacteria|none|none|none|Candidatus_Marinamargulisbacteria_bacterium_SCGC_AAA071-K20|GCA_003265975	Candidatus_Marinamargulisbacteria|none|Candidatus_Margulisbacteria|Candidatus_Marinamargulisbacteria|none|none|none|Candidatus_Marinamargulisbacteria_bacterium_SCGC_AAA071-K20|GCA_003265975
GCA_001872685.1	Candidatus_Marinimicrobia	Candidatus_Marinimicrobia	none	Candidatus_Marinimicrobia	Bacteria	none	Candidatus_Marinimicrobia	none	none	none	none	Candidatus_Marinimicrobia_bacterium_CG1_02_48_14	GCA_001872685	Candidatus_Marinimicrobia|none|Candidatus_Marinimicrobia|none|none|none|none|Candidatus_Marinimicrobia_bacterium_CG1_02_48_14|GCA_001872685	Candidatus_Marinimicrobia|none|Candidatus_Marinimicrobia|none|none|none|none|Candidatus_Marinimicrobia_bacterium_CG1_02_48_14|GCA_001872685
GCA_002256485.1	Candidatus_Marinimicrobia	Candidatus_Marinimicrobia	none	Candidatus_Marinimicrobia	Bacteria	none	Candidatus_Marinimicrobia	none	none	none	none	Candidatus_Marinimicrobia_bacterium_408169	GCA_002256485	Candidatus_Marinimicrobia|none|Candidatus_Marinimicrobia|none|none|none|none|Candidatus_Marinimicrobia_bacterium_408169|GCA_002256485	Candidatus_Marinimicrobia|none|Candidatus_Marinimicrobia|none|none|none|none|Candidatus_Marinimicrobia_bacterium_408169|GCA_002256485
GCA_001899365.1	Candidatus_Melainabacteria	Candidatus_Melainabacteria	none	Candidatus_Melainabacteria	Bacteria	none	Candidatus_Melainabacteria	none	Candidatus_Gastranaerophilales	none	none	Candidatus_Gastranaerophilales_bacterium_Zag_1	GCA_001899365	Candidatus_Melainabacteria|none|Candidatus_Melainabacteria|none|Candidatus_Gastranaerophilales|none|none|Candidatus_Gastranaerophilales_bacterium_Zag_1|GCA_001899365	Candidatus_Melainabacteria|none|Candidatus_Melainabacteria|none|Candidatus_Gastranaerophilales|none|none|Candidatus_Gastranaerophilales_bacterium_Zag_1|GCA_001899365
GCA_001784555.1	Candidatus_Melainabacteria	Candidatus_Melainabacteria	none	Candidatus_Melainabacteria	Bacteria	none	Candidatus_Melainabacteria	none	none	none	none	Candidatus_Melainabacteria_bacterium_RIFCSPHIGHO2_02_FULL_34_12	GCA_001784555	Candidatus_Melainabacteria|none|Candidatus_Melainabacteria|none|none|none|none|Candidatus_Melainabacteria_bacterium_RIFCSPHIGHO2_02_FULL_34_12|GCA_001784555	Candidatus_Melainabacteria|none|Candidatus_Melainabacteria|none|none|none|none|Candidatus_Melainabacteria_bacterium_RIFCSPHIGHO2_02_FULL_34_12|GCA_001784555
GCA_002780175.1	Candidatus_Moranbacteria	Candidatus_Moranbacteria	none	Candidatus_Moranbacteria	Bacteria	none	Candidatus_Moranbacteria	none	none	none	none	Candidatus_Moranbacteria_bacterium_CG06_land_8_20_14_3_00_40_12	GCA_002780175	Candidatus_Moranbacteria|none|Candidatus_Moranbacteria|none|none|none|none|Candidatus_Moranbacteria_bacterium_CG06_land_8_20_14_3_00_40_12|GCA_002780175	Candidatus_Moranbacteria|none|Candidatus_Moranbacteria|none|none|none|none|Candidatus_Moranbacteria_bacterium_CG06_land_8_20_14_3_00_40_12|GCA_002780175
GCA_001819215.1	Candidatus_Nealsonbacteria	Candidatus_Nealsonbacteria	none	Candidatus_Nealsonbacteria	Bacteria	none	Candidatus_Nealsonbacteria	none	none	none	none	Candidatus_Nealsonbacteria_bacterium_RIFCSPHIGHO2_01_FULL_38_55	GCA_001819215	Candidatus_Nealsonbacteria|none|Candidatus_Nealsonbacteria|none|none|none|none|Candidatus_Nealsonbacteria_bacterium_RIFCSPHIGHO2_01_FULL_38_55|GCA_001819215	Candidatus_Nealsonbacteria|none|Candidatus_Nealsonbacteria|none|none|none|none|Candidatus_Nealsonbacteria_bacterium_RIFCSPHIGHO2_01_FULL_38_55|GCA_001819215
GCA_001805325.1	Candidatus_Omnitrophica	Candidatus_Omnitrophica	none	Candidatus_Omnitrophica	Bacteria	none	Candidatus_Omnitrophica	none	none	none	none	Omnitrophica_bacterium_RIFCSPHIGHO2_02_FULL_45_28	GCA_001805325	Candidatus_Omnitrophica|none|Candidatus_Omnitrophica|none|none|none|none|Omnitrophica_bacterium_RIFCSPHIGHO2_02_FULL_45_28|GCA_001805325	Candidatus_Omnitrophica|none|Candidatus_Omnitrophica|none|none|none|none|Omnitrophica_bacterium_RIFCSPHIGHO2_02_FULL_45_28|GCA_001805325
GCA_002780625.1	Candidatus_Omnitrophica	Candidatus_Omnitrophica	none	Candidatus_Omnitrophica	Bacteria	none	Candidatus_Omnitrophica	none	none	none	none	Candidatus_Omnitrophica_bacterium_CG03_land_8_20_14_0_80_43_22	GCA_002780625	Candidatus_Omnitrophica|none|Candidatus_Omnitrophica|none|none|none|none|Candidatus_Omnitrophica_bacterium_CG03_land_8_20_14_0_80_43_22|GCA_002780625	Candidatus_Omnitrophica|none|Candidatus_Omnitrophica|none|none|none|none|Candidatus_Omnitrophica_bacterium_CG03_land_8_20_14_0_80_43_22|GCA_002780625
GCA_002792715.1	Candidatus_Omnitrophica	Candidatus_Omnitrophica	none	Candidatus_Omnitrophica	Bacteria	none	Candidatus_Omnitrophica	none	none	none	none	Candidatus_Omnitrophica_bacterium_CG_4_10_14_0_2_um_filter_44_9	GCA_002792715	Candidatus_Omnitrophica|none|Candidatus_Omnitrophica|none|none|none|none|Candidatus_Omnitrophica_bacterium_CG_4_10_14_0_2_um_filter_44_9|GCA_002792715	Candidatus_Omnitrophica|none|Candidatus_Omnitrophica|none|none|none|none|Candidatus_Omnitrophica_bacterium_CG_4_10_14_0_2_um_filter_44_9|GCA_002792715
GCA_002422165.1	Candidatus_Pacebacteria	Candidatus_Pacebacteria	none	Candidatus_Pacebacteria	Bacteria	none	Candidatus_Pacebacteria	none	none	none	none	Candidatus_Pacebacteria_bacterium_UBA6180	GCA_002422165	Candidatus_Pacebacteria|none|Candidatus_Pacebacteria|none|none|none|none|Candidatus_Pacebacteria_bacterium_UBA6180|GCA_002422165	Candidatus_Pacebacteria|none|Candidatus_Pacebacteria|none|none|none|none|Candidatus_Pacebacteria_bacterium_UBA6180|GCA_002422165
GCA_000398025.1	Candidatus_Parcubacteria	Candidatus_Parcubacteria	none	Candidatus_Parcubacteria	Bacteria	none	Candidatus_Parcubacteria	none	none	none	Candidatus_Paceibacter	Candidatus_Paceibacter_normanii	GCA_000398025	Candidatus_Parcubacteria|none|Candidatus_Parcubacteria|none|none|none|Candidatus_Paceibacter|Candidatus_Paceibacter_normanii|GCA_000398025	Candidatus_Parcubacteria|none|Candidatus_Parcubacteria|none|none|none|Candidatus_Paceibacter|Candidatus_Paceibacter_normanii|GCA_000398025
GCA_001787635.1	Candidatus_Peregrinibacteria	Candidatus_Peregrinibacteria	Candidatus_Peribacteria	Candidatus_Peribacteria	Bacteria	none	Candidatus_Peregrinibacteria	Candidatus_Peribacteria	none	none	none	Candidatus_Peribacteria_bacterium_RIFCSPLOWO2_01_FULL_51_18	GCA_001787635	Candidatus_Peregrinibacteria|none|Candidatus_Peregrinibacteria|Candidatus_Peribacteria|none|none|none|Candidatus_Peribacteria_bacterium_RIFCSPLOWO2_01_FULL_51_18|GCA_001787635	Candidatus_Peribacteria|none|Candidatus_Peregrinibacteria|Candidatus_Peribacteria|none|none|none|Candidatus_Peribacteria_bacterium_RIFCSPLOWO2_01_FULL_51_18|GCA_001787635
GCA_002729015.1	Candidatus_Poribacteria	Candidatus_Poribacteria	none	Candidatus_Poribacteria	Bacteria	none	Candidatus_Poribacteria	none	none	none	none	Poribacteria_bacterium_RS423	GCA_002729015	Candidatus_Poribacteria|none|Candidatus_Poribacteria|none|none|none|none|Poribacteria_bacterium_RS423|GCA_002729015	Candidatus_Poribacteria|none|Candidatus_Poribacteria|none|none|none|none|Poribacteria_bacterium_RS423|GCA_002729015
GCA_000406005.1	Candidatus_Poribacteria	Candidatus_Poribacteria	none	Candidatus_Poribacteria	Bacteria	none	Candidatus_Poribacteria	none	none	none	none	Candidatus_Poribacteria_bacterium_WGA-3G	GCA_000406005	Candidatus_Poribacteria|none|Candidatus_Poribacteria|none|none|none|none|Candidatus_Poribacteria_bacterium_WGA-3G|GCA_000406005	Candidatus_Poribacteria|none|Candidatus_Poribacteria|none|none|none|none|Candidatus_Poribacteria_bacterium_WGA-3G|GCA_000406005
GCA_001789205.1	Candidatus_Raymondbacteria	Candidatus_Raymondbacteria	none	Candidatus_Raymondbacteria	Bacteria	none	Candidatus_Raymondbacteria	none	none	none	none	Candidatus_Raymondbacteria_bacterium_RIFOXYA2_FULL_49_16	GCA_001789205	Candidatus_Raymondbacteria|none|Candidatus_Raymondbacteria|none|none|none|none|Candidatus_Raymondbacteria_bacterium_RIFOXYA2_FULL_49_16|GCA_001789205	Candidatus_Raymondbacteria|none|Candidatus_Raymondbacteria|none|none|none|none|Candidatus_Raymondbacteria_bacterium_RIFOXYA2_FULL_49_16|GCA_001789205
GCA_001789395.1	Candidatus_Roizmanbacteria	Candidatus_Roizmanbacteria	none	Candidatus_Roizmanbacteria	Bacteria	none	Candidatus_Roizmanbacteria	none	none	none	none	Candidatus_Roizmanbacteria_bacterium_RIFCSPHIGHO2_02_FULL_37_13b	GCA_001789395	Candidatus_Roizmanbacteria|none|Candidatus_Roizmanbacteria|none|none|none|none|Candidatus_Roizmanbacteria_bacterium_RIFCSPHIGHO2_02_FULL_37_13b|GCA_001789395	Candidatus_Roizmanbacteria|none|Candidatus_Roizmanbacteria|none|none|none|none|Candidatus_Roizmanbacteria_bacterium_RIFCSPHIGHO2_02_FULL_37_13b|GCA_001789395
GCA_001788415.1	Candidatus_Rokubacteria	Candidatus_Rokubacteria	none	Candidatus_Rokubacteria	Bacteria	none	Candidatus_Rokubacteria	none	none	none	none	Candidatus_Rokubacteria_bacterium_GWC2_70_16	GCA_001788415	Candidatus_Rokubacteria|none|Candidatus_Rokubacteria|none|none|none|none|Candidatus_Rokubacteria_bacterium_GWC2_70_16|GCA_001788415	Candidatus_Rokubacteria|none|Candidatus_Rokubacteria|none|none|none|none|Candidatus_Rokubacteria_bacterium_GWC2_70_16|GCA_001788415
GCA_000503915.1	Candidatus_Saccharibacteria	Candidatus_Saccharibacteria	none	Candidatus_Saccharibacteria	Bacteria	none	Candidatus_Saccharibacteria	none	none	none	none	Candidatus_Saccharibacteria_bacterium_RAAC3_TM7_1	GCA_000503915	Candidatus_Saccharibacteria|none|Candidatus_Saccharibacteria|none|none|none|none|Candidatus_Saccharibacteria_bacterium_RAAC3_TM7_1|GCA_000503915	Candidatus_Saccharibacteria|none|Candidatus_Saccharibacteria|none|none|none|none|Candidatus_Saccharibacteria_bacterium_RAAC3_TM7_1|GCA_000503915
GCA_001790445.1	Candidatus_Saccharibacteria	Candidatus_Saccharibacteria	none	Candidatus_Saccharibacteria	Bacteria	none	Candidatus_Saccharibacteria	none	none	none	none	Candidatus_Saccharibacteria_bacterium_RIFCSPHIGHO2_12_FULL_41_12	GCA_001790445	Candidatus_Saccharibacteria|none|Candidatus_Saccharibacteria|none|none|none|none|Candidatus_Saccharibacteria_bacterium_RIFCSPHIGHO2_12_FULL_41_12|GCA_001790445	Candidatus_Saccharibacteria|none|Candidatus_Saccharibacteria|none|none|none|none|Candidatus_Saccharibacteria_bacterium_RIFCSPHIGHO2_12_FULL_41_12|GCA_001790445
GCA_001790855.1	Candidatus_Schekmanbacteria	Candidatus_Schekmanbacteria	none	Candidatus_Schekmanbacteria	Bacteria	none	Candidatus_Schekmanbacteria	none	none	none	none	Candidatus_Schekmanbacteria_bacterium_RIFCSPLOWO2_02_FULL_38_14	GCA_001790855	Candidatus_Schekmanbacteria|none|Candidatus_Schekmanbacteria|none|none|none|none|Candidatus_Schekmanbacteria_bacterium_RIFCSPLOWO2_02_FULL_38_14|GCA_001790855	Candidatus_Schekmanbacteria|none|Candidatus_Schekmanbacteria|none|none|none|none|Candidatus_Schekmanbacteria_bacterium_RIFCSPLOWO2_02_FULL_38_14|GCA_001790855
GCA_002083825.1	Candidatus_Sericytochromatia	Candidatus_Sericytochromatia	Candidatus_Sericytochromatia	Candidatus_Sericytochromatia	Bacteria	none	Candidatus_Sericytochromatia	Candidatus_Sericytochromatia	none	none	none	Candidatus_Sericytochromatia_bacterium_S15B-MN24_CBMW_12	GCA_002083825	Candidatus_Sericytochromatia|none|Candidatus_Sericytochromatia|Candidatus_Sericytochromatia|none|none|none|Candidatus_Sericytochromatia_bacterium_S15B-MN24_CBMW_12|GCA_002083825	Candidatus_Sericytochromatia|none|Candidatus_Sericytochromatia|Candidatus_Sericytochromatia|none|none|none|Candidatus_Sericytochromatia_bacterium_S15B-MN24_CBMW_12|GCA_002083825
GCA_001819985.1	Candidatus_Spechtbacteria	Candidatus_Spechtbacteria	none	Candidatus_Spechtbacteria	Bacteria	none	Candidatus_Spechtbacteria	none	none	none	none	Candidatus_Spechtbacteria_bacterium_RIFCSPHIGHO2_02_FULL_43_15b	GCA_001819985	Candidatus_Spechtbacteria|none|Candidatus_Spechtbacteria|none|none|none|none|Candidatus_Spechtbacteria_bacterium_RIFCSPHIGHO2_02_FULL_43_15b|GCA_001819985	Candidatus_Spechtbacteria|none|Candidatus_Spechtbacteria|none|none|none|none|Candidatus_Spechtbacteria_bacterium_RIFCSPHIGHO2_02_FULL_43_15b|GCA_001819985
GCA_002771845.1	Candidatus_Stahlbacteria	Candidatus_Stahlbacteria	none	Candidatus_Stahlbacteria	Bacteria	none	Candidatus_Stahlbacteria	none	none	none	none	bacterium_Candidatus_Stahlbacteria_CG23_combo_of_CG06-09_8_20_14_all_40_9	GCA_002771845	Candidatus_Stahlbacteria|none|Candidatus_Stahlbacteria|none|none|none|none|bacterium_Candidatus_Stahlbacteria_CG23_combo_of_CG06-09_8_20_14_all_40_9|GCA_002771845	Candidatus_Stahlbacteria|none|Candidatus_Stahlbacteria|none|none|none|none|bacterium_Candidatus_Stahlbacteria_CG23_combo_of_CG06-09_8_20_14_all_40_9|GCA_002771845
GCA_001820295.1	Candidatus_Staskawiczbacteria	Candidatus_Staskawiczbacteria	none	Candidatus_Staskawiczbacteria	Bacteria	none	Candidatus_Staskawiczbacteria	none	none	none	none	Candidatus_Staskawiczbacteria_bacterium_RIFOXYA1_FULL_37_15	GCA_001820295	Candidatus_Staskawiczbacteria|none|Candidatus_Staskawiczbacteria|none|none|none|none|Candidatus_Staskawiczbacteria_bacterium_RIFOXYA1_FULL_37_15|GCA_001820295	Candidatus_Staskawiczbacteria|none|Candidatus_Staskawiczbacteria|none|none|none|none|Candidatus_Staskawiczbacteria_bacterium_RIFOXYA1_FULL_37_15|GCA_001820295
GCA_001821935.1	Candidatus_Staskawiczbacteria	Candidatus_Staskawiczbacteria	none	Candidatus_Staskawiczbacteria	Bacteria	none	Candidatus_Staskawiczbacteria	none	none	none	none	Candidatus_Staskawiczbacteria_bacterium_RIFCSPHIGHO2_02_FULL_43_16	GCA_001821935	Candidatus_Staskawiczbacteria|none|Candidatus_Staskawiczbacteria|none|none|none|none|Candidatus_Staskawiczbacteria_bacterium_RIFCSPHIGHO2_02_FULL_43_16|GCA_001821935	Candidatus_Staskawiczbacteria|none|Candidatus_Staskawiczbacteria|none|none|none|none|Candidatus_Staskawiczbacteria_bacterium_RIFCSPHIGHO2_02_FULL_43_16|GCA_001821935
GCA_001822375.1	Candidatus_Sungbacteria	Candidatus_Sungbacteria	none	Candidatus_Sungbacteria	Bacteria	none	Candidatus_Sungbacteria	none	none	none	none	Candidatus_Sungbacteria_bacterium_RIFCSPHIGHO2_02_FULL_53_17	GCA_001822375	Candidatus_Sungbacteria|none|Candidatus_Sungbacteria|none|none|none|none|Candidatus_Sungbacteria_bacterium_RIFCSPHIGHO2_02_FULL_53_17|GCA_001822375	Candidatus_Sungbacteria|none|Candidatus_Sungbacteria|none|none|none|none|Candidatus_Sungbacteria_bacterium_RIFCSPHIGHO2_02_FULL_53_17|GCA_001822375
GCA_900079095.1	Candidatus_Tectomicrobia	Candidatus_Tectomicrobia	none	Candidatus_Tectomicrobia	Bacteria	none	Candidatus_Tectomicrobia	none	none	none	Candidatus_Entotheonella	Candidatus_Entotheonella_palauensis	GCA_900079095	Candidatus_Tectomicrobia|none|Candidatus_Tectomicrobia|none|none|none|Candidatus_Entotheonella|Candidatus_Entotheonella_palauensis|GCA_900079095	Candidatus_Tectomicrobia|none|Candidatus_Tectomicrobia|none|none|none|Candidatus_Entotheonella|Candidatus_Entotheonella_palauensis|GCA_900079095
GCA_001822905.1	Candidatus_Terrybacteria	Candidatus_Terrybacteria	none	Candidatus_Terrybacteria	Bacteria	none	Candidatus_Terrybacteria	none	none	none	none	Candidatus_Terrybacteria_bacterium_RIFCSPLOWO2_01_FULL_44_24	GCA_001822905	Candidatus_Terrybacteria|none|Candidatus_Terrybacteria|none|none|none|none|Candidatus_Terrybacteria_bacterium_RIFCSPLOWO2_01_FULL_44_24|GCA_001822905	Candidatus_Terrybacteria|none|Candidatus_Terrybacteria|none|none|none|none|Candidatus_Terrybacteria_bacterium_RIFCSPLOWO2_01_FULL_44_24|GCA_001822905
GCA_002772495.1	Candidatus_Vogelbacteria	Candidatus_Vogelbacteria	none	Candidatus_Vogelbacteria	Bacteria	none	Candidatus_Vogelbacteria	none	none	none	none	Candidatus_Vogelbacteria_bacterium_CG22_combo_CG10-13_8_21_14_all_37_9	GCA_002772495	Candidatus_Vogelbacteria|none|Candidatus_Vogelbacteria|none|none|none|none|Candidatus_Vogelbacteria_bacterium_CG22_combo_CG10-13_8_21_14_all_37_9|GCA_002772495	Candidatus_Vogelbacteria|none|Candidatus_Vogelbacteria|none|none|none|none|Candidatus_Vogelbacteria_bacterium_CG22_combo_CG10-13_8_21_14_all_37_9|GCA_002772495
GCA_001825035.1	Candidatus_Wildermuthbacteria	Candidatus_Wildermuthbacteria	none	Candidatus_Wildermuthbacteria	Bacteria	none	Candidatus_Wildermuthbacteria	none	none	none	none	Candidatus_Wildermuthbacteria_bacterium_RIFOXYD1_FULL_50_12	GCA_001825035	Candidatus_Wildermuthbacteria|none|Candidatus_Wildermuthbacteria|none|none|none|none|Candidatus_Wildermuthbacteria_bacterium_RIFOXYD1_FULL_50_12|GCA_001825035	Candidatus_Wildermuthbacteria|none|Candidatus_Wildermuthbacteria|none|none|none|none|Candidatus_Wildermuthbacteria_bacterium_RIFOXYD1_FULL_50_12|GCA_001825035
GCA_001029755.1	Candidatus_Woesebacteria	Candidatus_Woesebacteria	none	Candidatus_Woesebacteria	Bacteria	none	Candidatus_Woesebacteria	none	none	none	none	Candidatus_Woesebacteria_bacterium_GW2011_GWF1_31_35	GCA_001029755	Candidatus_Woesebacteria|none|Candidatus_Woesebacteria|none|none|none|none|Candidatus_Woesebacteria_bacterium_GW2011_GWF1_31_35|GCA_001029755	Candidatus_Woesebacteria|none|Candidatus_Woesebacteria|none|none|none|none|Candidatus_Woesebacteria_bacterium_GW2011_GWF1_31_35|GCA_001029755
GCA_001793975.1	Candidatus_Wolfebacteria	Candidatus_Wolfebacteria	none	Candidatus_Wolfebacteria	Bacteria	none	Candidatus_Wolfebacteria	none	none	none	none	Candidatus_Wolfebacteria_bacterium_RIFOXYD2_FULL_48_11	GCA_001793975	Candidatus_Wolfebacteria|none|Candidatus_Wolfebacteria|none|none|none|none|Candidatus_Wolfebacteria_bacterium_RIFOXYD2_FULL_48_11|GCA_001793975	Candidatus_Wolfebacteria|none|Candidatus_Wolfebacteria|none|none|none|none|Candidatus_Wolfebacteria_bacterium_RIFOXYD2_FULL_48_11|GCA_001793975
GCA_001816645.1	Candidatus_Woykebacteria	Candidatus_Woykebacteria	none	Candidatus_Woykebacteria	Bacteria	none	Candidatus_Woykebacteria	none	none	none	none	Candidatus_Woykebacteria_bacterium_GWB1_45_5	GCA_001816645	Candidatus_Woykebacteria|none|Candidatus_Woykebacteria|none|none|none|none|Candidatus_Woykebacteria_bacterium_GWB1_45_5|GCA_001816645	Candidatus_Woykebacteria|none|Candidatus_Woykebacteria|none|none|none|none|Candidatus_Woykebacteria_bacterium_GWB1_45_5|GCA_001816645
GCA_002794035.1	Candidatus_Yanofskybacteria	Candidatus_Yanofskybacteria	none	Candidatus_Yanofskybacteria	Bacteria	none	Candidatus_Yanofskybacteria	none	none	none	none	Candidatus_Yanofskybacteria_bacterium_CG10_big_fil_rev_8_21_14_0_10_36_16	GCA_002794035	Candidatus_Yanofskybacteria|none|Candidatus_Yanofskybacteria|none|none|none|none|Candidatus_Yanofskybacteria_bacterium_CG10_big_fil_rev_8_21_14_0_10_36_16|GCA_002794035	Candidatus_Yanofskybacteria|none|Candidatus_Yanofskybacteria|none|none|none|none|Candidatus_Yanofskybacteria_bacterium_CG10_big_fil_rev_8_21_14_0_10_36_16|GCA_002794035
GCA_001823825.1	Candidatus_Zambryskibacteria	Candidatus_Zambryskibacteria	none	Candidatus_Zambryskibacteria	Bacteria	none	Candidatus_Zambryskibacteria	none	none	none	none	Candidatus_Zambryskibacteria_bacterium_RIFCSPHIGHO2_12_FULL_39_21	GCA_001823825	Candidatus_Zambryskibacteria|none|Candidatus_Zambryskibacteria|none|none|none|none|Candidatus_Zambryskibacteria_bacterium_RIFCSPHIGHO2_12_FULL_39_21|GCA_001823825	Candidatus_Zambryskibacteria|none|Candidatus_Zambryskibacteria|none|none|none|none|Candidatus_Zambryskibacteria_bacterium_RIFCSPHIGHO2_12_FULL_39_21|GCA_001823825
GCA_000750955.1	Chlamydiae	Parachlamydiales	Chlamydiia	Chlamydiia	Bacteria	none	Chlamydiae	Chlamydiia	Parachlamydiales	Criblamydiaceae	Criblamydia	Criblamydia_sequanensis	GCA_000750955	Chlamydiae|none|Chlamydiae|Chlamydiia|Parachlamydiales|Criblamydiaceae|Criblamydia|Criblamydia_sequanensis|GCA_000750955	Chlamydiia|none|Chlamydiae|Chlamydiia|Parachlamydiales|Criblamydiaceae|Criblamydia|Criblamydia_sequanensis|GCA_000750955
GCA_000875975.1	Chlamydiae	Parachlamydiales	Chlamydiia	Chlamydiia	Bacteria	none	Chlamydiae	Chlamydiia	Parachlamydiales	Parachlamydiaceae	Parachlamydia	Parachlamydia_acanthamoebae	GCA_000875975	Chlamydiae|none|Chlamydiae|Chlamydiia|Parachlamydiales|Parachlamydiaceae|Parachlamydia|Parachlamydia_acanthamoebae|GCA_000875975	Chlamydiia|none|Chlamydiae|Chlamydiia|Parachlamydiales|Parachlamydiaceae|Parachlamydia|Parachlamydia_acanthamoebae|GCA_000875975
GCA_000020465.1	Chlorobi	Chlorobiales	Chlorobia	Chlorobia	Bacteria	none	Chlorobi	Chlorobia	Chlorobiales	Chlorobiaceae	Chlorobium	Chlorobium_limicola	GCA_000020465	Chlorobi|none|Chlorobi|Chlorobia|Chlorobiales|Chlorobiaceae|Chlorobium|Chlorobium_limicola|GCA_000020465	Chlorobia|none|Chlorobi|Chlorobia|Chlorobiales|Chlorobiaceae|Chlorobium|Chlorobium_limicola|GCA_000020465
GCA_000020645.1	Chlorobi	Chlorobiales	Chlorobia	Chlorobia	Bacteria	none	Chlorobi	Chlorobia	Chlorobiales	Chlorobiaceae	Pelodictyon	Pelodictyon_phaeoclathratiforme	GCA_000020645	Chlorobi|none|Chlorobi|Chlorobia|Chlorobiales|Chlorobiaceae|Pelodictyon|Pelodictyon_phaeoclathratiforme|GCA_000020645	Chlorobia|none|Chlorobi|Chlorobia|Chlorobiales|Chlorobiaceae|Pelodictyon|Pelodictyon_phaeoclathratiforme|GCA_000020645
GCA_000020625.1	Chlorobi	Chlorobiales	Chlorobia	Chlorobia	Bacteria	none	Chlorobi	Chlorobia	Chlorobiales	Chlorobiaceae	Prosthecochloris	Prosthecochloris_aestuarii	GCA_000020625	Chlorobi|none|Chlorobi|Chlorobia|Chlorobiales|Chlorobiaceae|Prosthecochloris|Prosthecochloris_aestuarii|GCA_000020625	Chlorobia|none|Chlorobi|Chlorobia|Chlorobiales|Chlorobiaceae|Prosthecochloris|Prosthecochloris_aestuarii|GCA_000020625
GCA_900184705.1	Chloroflexi	Anaerolineales	Anaerolineae	Anaerolineae	Bacteria	none	Chloroflexi	Anaerolineae	Anaerolineales	Anaerolineaceae	Brevefilum	Brevefilum_fermentans	GCA_900184705	Chloroflexi|none|Chloroflexi|Anaerolineae|Anaerolineales|Anaerolineaceae|Brevefilum|Brevefilum_fermentans|GCA_900184705	Anaerolineae|none|Chloroflexi|Anaerolineae|Anaerolineales|Anaerolineaceae|Brevefilum|Brevefilum_fermentans|GCA_900184705
GCA_001306115.1	Chloroflexi	Anaerolineales	Anaerolineae	Anaerolineae	Bacteria	none	Chloroflexi	Anaerolineae	Anaerolineales	Anaerolineaceae	Ornatilinea	Ornatilinea_apprima	GCA_001306115	Chloroflexi|none|Chloroflexi|Anaerolineae|Anaerolineales|Anaerolineaceae|Ornatilinea|Ornatilinea_apprima|GCA_001306115	Anaerolineae|none|Chloroflexi|Anaerolineae|Anaerolineales|Anaerolineaceae|Ornatilinea|Ornatilinea_apprima|GCA_001306115
GCA_900066015.1	Chloroflexi	Ardenticatenales	Ardenticatenia	Ardenticatenia	Bacteria	none	Chloroflexi	Ardenticatenia	Ardenticatenales	Ardenticatenaceae	Candidatus_Promineofilum	Candidatus_Promineofilum_breve	GCA_900066015	Chloroflexi|none|Chloroflexi|Ardenticatenia|Ardenticatenales|Ardenticatenaceae|Candidatus_Promineofilum|Candidatus_Promineofilum_breve|GCA_900066015	Ardenticatenia|none|Chloroflexi|Ardenticatenia|Ardenticatenales|Ardenticatenaceae|Candidatus_Promineofilum|Candidatus_Promineofilum_breve|GCA_900066015
GCA_000281175.1	Chloroflexi	Caldilineales	Caldilineae	Caldilineae	Bacteria	none	Chloroflexi	Caldilineae	Caldilineales	Caldilineaceae	Caldilinea	Caldilinea_aerophila	GCA_000281175	Chloroflexi|none|Chloroflexi|Caldilineae|Caldilineales|Caldilineaceae|Caldilinea|Caldilinea_aerophila|GCA_000281175	Caldilineae|none|Chloroflexi|Caldilineae|Caldilineales|Caldilineaceae|Caldilinea|Caldilinea_aerophila|GCA_000281175
GCA_000018865.1	Chloroflexi	Chloroflexales	Chloroflexia	Chloroflexia	Bacteria	none	Chloroflexi	Chloroflexia	Chloroflexales	Chloroflexaceae	Chloroflexus	Chloroflexus_aurantiacus	GCA_000018865	Chloroflexi|none|Chloroflexi|Chloroflexia|Chloroflexales|Chloroflexaceae|Chloroflexus|Chloroflexus_aurantiacus|GCA_000018865	Chloroflexia|none|Chloroflexi|Chloroflexia|Chloroflexales|Chloroflexaceae|Chloroflexus|Chloroflexus_aurantiacus|GCA_000018865
GCA_000018565.1	Chloroflexi	Herpetosiphonales	Chloroflexia	Chloroflexia	Bacteria	none	Chloroflexi	Chloroflexia	Herpetosiphonales	Herpetosiphonaceae	Herpetosiphon	Herpetosiphon_aurantiacus	GCA_000018565	Chloroflexi|none|Chloroflexi|Chloroflexia|Herpetosiphonales|Herpetosiphonaceae|Herpetosiphon|Herpetosiphon_aurantiacus|GCA_000018565	Chloroflexia|none|Chloroflexi|Chloroflexia|Herpetosiphonales|Herpetosiphonaceae|Herpetosiphon|Herpetosiphon_aurantiacus|GCA_000018565
GCA_000011905.1	Chloroflexi	Dehalococcoidales	Dehalococcoidia	Dehalococcoidia	Bacteria	none	Chloroflexi	Dehalococcoidia	Dehalococcoidales	Dehalococcoidaceae	Dehalococcoides	Dehalococcoides_mccartyi	GCA_000011905	Chloroflexi|none|Chloroflexi|Dehalococcoidia|Dehalococcoidales|Dehalococcoidaceae|Dehalococcoides|Dehalococcoides_mccartyi|GCA_000011905	Dehalococcoidia|none|Chloroflexi|Dehalococcoidia|Dehalococcoidales|Dehalococcoidaceae|Dehalococcoides|Dehalococcoides_mccartyi|GCA_000011905
GCA_000143165.1	Chloroflexi	Dehalococcoidales	Dehalococcoidia	Dehalococcoidia	Bacteria	none	Chloroflexi	Dehalococcoidia	none	none	Dehalogenimonas	Dehalogenimonas_lykanthroporepellens	GCA_000143165	Chloroflexi|none|Chloroflexi|Dehalococcoidia|none|none|Dehalogenimonas|Dehalogenimonas_lykanthroporepellens|GCA_000143165	Dehalococcoidia|none|Chloroflexi|Dehalococcoidia|none|none|Dehalogenimonas|Dehalogenimonas_lykanthroporepellens|GCA_000143165
GCA_000702505.1	Chloroflexi	Ktedonobacterales	Ktedonobacteria	Ktedonobacteria	Bacteria	none	Chloroflexi	Ktedonobacteria	Thermogemmatisporales	Thermogemmatisporaceae	Thermogemmatispora	Thermogemmatispora_carboxidivorans	GCA_000702505	Chloroflexi|none|Chloroflexi|Ktedonobacteria|Thermogemmatisporales|Thermogemmatisporaceae|Thermogemmatispora|Thermogemmatispora_carboxidivorans|GCA_000702505	Ktedonobacteria|none|Chloroflexi|Ktedonobacteria|Thermogemmatisporales|Thermogemmatisporaceae|Thermogemmatispora|Thermogemmatispora_carboxidivorans|GCA_000702505
GCA_900187885.1	Chloroflexi	Thermoflexia	Thermoflexia	Thermoflexia	Bacteria	none	Chloroflexi	Thermoflexia	Thermoflexales	Thermoflexaceae	Thermoflexus	Thermoflexus_hugenholtzii	GCA_900187885	Chloroflexi|none|Chloroflexi|Thermoflexia|Thermoflexales|Thermoflexaceae|Thermoflexus|Thermoflexus_hugenholtzii|GCA_900187885	Thermoflexia|none|Chloroflexi|Thermoflexia|Thermoflexales|Thermoflexaceae|Thermoflexus|Thermoflexus_hugenholtzii|GCA_900187885
GCA_000021685.1	Chloroflexi	Thermomicrobia	Thermomicrobia	Thermomicrobia	Bacteria	none	Chloroflexi	Thermomicrobia	Thermomicrobiales	Thermomicrobiaceae	Thermomicrobium	Thermomicrobium_roseum	GCA_000021685	Chloroflexi|none|Chloroflexi|Thermomicrobia|Thermomicrobiales|Thermomicrobiaceae|Thermomicrobium|Thermomicrobium_roseum|GCA_000021685	Thermomicrobia|none|Chloroflexi|Thermomicrobia|Thermomicrobiales|Thermomicrobiaceae|Thermomicrobium|Thermomicrobium_roseum|GCA_000021685
GCA_000469585.1	Chrysiogenetes	Chrysiogenetes	Chrysiogenetes	Chrysiogenetes	Bacteria	none	Chrysiogenetes	Chrysiogenetes	Chrysiogenales	Chrysiogenaceae	Chrysiogenes	Chrysiogenes_arsenatis	GCA_000469585	Chrysiogenetes|none|Chrysiogenetes|Chrysiogenetes|Chrysiogenales|Chrysiogenaceae|Chrysiogenes|Chrysiogenes_arsenatis|GCA_000469585	Chrysiogenetes|none|Chrysiogenetes|Chrysiogenetes|Chrysiogenales|Chrysiogenaceae|Chrysiogenes|Chrysiogenes_arsenatis|GCA_000469585
GCA_000020945.1	Coprothermobacterota	Coprothermobacterota	Coprothermobacteria	Coprothermobacteria	Bacteria	none	Coprothermobacterota	Coprothermobacteria	Coprothermobacterales	Coprothermobacteraceae	Coprothermobacter	Coprothermobacter_proteolyticus	GCA_000020945	Coprothermobacterota|none|Coprothermobacterota|Coprothermobacteria|Coprothermobacterales|Coprothermobacteraceae|Coprothermobacter|Coprothermobacter_proteolyticus|GCA_000020945	Coprothermobacteria|none|Coprothermobacterota|Coprothermobacteria|Coprothermobacterales|Coprothermobacteraceae|Coprothermobacter|Coprothermobacter_proteolyticus|GCA_000020945
GCA_000484535.1	Cyanobacteria	Gloeobacterales	Gloeobacteria	Gloeobacteria	Bacteria	none	Cyanobacteria	Gloeobacteria	Gloeobacterales	Gloeobacteraceae	Gloeobacter	Gloeobacter_kilaueensis	GCA_000484535	Cyanobacteria|none|Cyanobacteria|Gloeobacteria|Gloeobacterales|Gloeobacteraceae|Gloeobacter|Gloeobacter_kilaueensis|GCA_000484535	Gloeobacteria|none|Cyanobacteria|Gloeobacteria|Gloeobacterales|Gloeobacteraceae|Gloeobacter|Gloeobacter_kilaueensis|GCA_000484535
GCA_000167195.1	Cyanobacteria	Chroococcales	none	Cyanobacteria	Bacteria	none	Cyanobacteria	none	Chroococcales	Aphanothecaceae	Crocosphaera	Crocosphaera_watsonii	GCA_000167195	Cyanobacteria|none|Cyanobacteria|none|Chroococcales|Aphanothecaceae|Crocosphaera|Crocosphaera_watsonii|GCA_000167195	Cyanobacteria|none|Cyanobacteria|none|Chroococcales|Aphanothecaceae|Crocosphaera|Crocosphaera_watsonii|GCA_000167195
GCA_001904655.1	Cyanobacteria	Chroococcales	none	Cyanobacteria	Bacteria	none	Cyanobacteria	none	Chroococcales	Chroococcaceae	Chroogloeocystis	Chroogloeocystis_siderophila	GCA_001904655	Cyanobacteria|none|Cyanobacteria|none|Chroococcales|Chroococcaceae|Chroogloeocystis|Chroogloeocystis_siderophila|GCA_001904655	Cyanobacteria|none|Cyanobacteria|none|Chroococcales|Chroococcaceae|Chroogloeocystis|Chroogloeocystis_siderophila|GCA_001904655
GCA_001870225.1	Cyanobacteria	Gloeoemargaritales	none	Cyanobacteria	Bacteria	none	Cyanobacteria	none	Gloeoemargaritales	Gloeomargaritaceae	Gloeomargarita	Gloeomargarita_lithophora	GCA_001870225	Cyanobacteria|none|Cyanobacteria|none|Gloeoemargaritales|Gloeomargaritaceae|Gloeomargarita|Gloeomargarita_lithophora|GCA_001870225	Cyanobacteria|none|Cyanobacteria|none|Gloeoemargaritales|Gloeomargaritaceae|Gloeomargarita|Gloeomargarita_lithophora|GCA_001870225
GCA_000521175.1	Cyanobacteria	Nostocales	none	Cyanobacteria	Bacteria	none	Cyanobacteria	none	Nostocales	Aphanizomenonaceae	Aphanizomenon	Aphanizomenon_flos-aquae	GCA_000521175	Cyanobacteria|none|Cyanobacteria|none|Nostocales|Aphanizomenonaceae|Aphanizomenon|Aphanizomenon_flos-aquae|GCA_000521175	Cyanobacteria|none|Cyanobacteria|none|Nostocales|Aphanizomenonaceae|Aphanizomenon|Aphanizomenon_flos-aquae|GCA_000521175
GCA_001676585.1	Cyanobacteria	Nostocales	none	Cyanobacteria	Bacteria	none	Cyanobacteria	none	Nostocales	Aphanizomenonaceae	Cylindrospermopsis	Cylindrospermopsis_raciborskii	GCA_001676585	Cyanobacteria|none|Cyanobacteria|none|Nostocales|Aphanizomenonaceae|Cylindrospermopsis|Cylindrospermopsis_raciborskii|GCA_001676585	Cyanobacteria|none|Cyanobacteria|none|Nostocales|Aphanizomenonaceae|Cylindrospermopsis|Cylindrospermopsis_raciborskii|GCA_001676585
GCA_000317285.1	Cyanobacteria	Nostocales	none	Cyanobacteria	Bacteria	none	Cyanobacteria	none	Nostocales	Chlorogloeopsidaceae	Chlorogloeopsis	Chlorogloeopsis_fritschii	GCA_000317285	Cyanobacteria|none|Cyanobacteria|none|Nostocales|Chlorogloeopsidaceae|Chlorogloeopsis|Chlorogloeopsis_fritschii|GCA_000317285	Cyanobacteria|none|Cyanobacteria|none|Nostocales|Chlorogloeopsidaceae|Chlorogloeopsis|Chlorogloeopsis_fritschii|GCA_000317285
GCA_000346485.2	Cyanobacteria	Nostocales	none	Cyanobacteria	Bacteria	none	Cyanobacteria	none	Nostocales	Scytonemataceae	Scytonema	Scytonema_hofmannii	GCA_000346485	Cyanobacteria|none|Cyanobacteria|none|Nostocales|Scytonemataceae|Scytonema|Scytonema_hofmannii|GCA_000346485	Cyanobacteria|none|Cyanobacteria|none|Nostocales|Scytonemataceae|Scytonema|Scytonema_hofmannii|GCA_000346485
GCA_000014265.1	Cyanobacteria	Oscillatoriales	none	Cyanobacteria	Bacteria	none	Cyanobacteria	none	Oscillatoriales	Microcoleaceae	Trichodesmium	Trichodesmium_erythraeum	GCA_000014265	Cyanobacteria|none|Cyanobacteria|none|Oscillatoriales|Microcoleaceae|Trichodesmium|Trichodesmium_erythraeum|GCA_000014265	Cyanobacteria|none|Cyanobacteria|none|Oscillatoriales|Microcoleaceae|Trichodesmium|Trichodesmium_erythraeum|GCA_000014265
GCA_000317575.1	Cyanobacteria	Pleurocapsales	none	Cyanobacteria	Bacteria	none	Cyanobacteria	none	Pleurocapsales	Dermocarpellaceae	Stanieria	Stanieria_cyanosphaera	GCA_000317575	Cyanobacteria|none|Cyanobacteria|none|Pleurocapsales|Dermocarpellaceae|Stanieria|Stanieria_cyanosphaera|GCA_000317575	Cyanobacteria|none|Cyanobacteria|none|Pleurocapsales|Dermocarpellaceae|Stanieria|Stanieria_cyanosphaera|GCA_000317575
GCA_000775285.1	Cyanobacteria	Synechococcales	none	Cyanobacteria	Bacteria	none	Cyanobacteria	none	Synechococcales	Leptolyngbyaceae	Neosynechococcus	Neosynechococcus_sphagnicola	GCA_000775285	Cyanobacteria|none|Cyanobacteria|none|Synechococcales|Leptolyngbyaceae|Neosynechococcus|Neosynechococcus_sphagnicola|GCA_000775285	Cyanobacteria|none|Cyanobacteria|none|Synechococcales|Leptolyngbyaceae|Neosynechococcus|Neosynechococcus_sphagnicola|GCA_000775285
GCA_000015645.1	Cyanobacteria	Synechococcales	none	Cyanobacteria	Bacteria	none	Cyanobacteria	none	Synechococcales	Prochloraceae	Prochlorococcus	Prochlorococcus_marinus	GCA_000015645	Cyanobacteria|none|Cyanobacteria|none|Synechococcales|Prochloraceae|Prochlorococcus|Prochlorococcus_marinus|GCA_000015645	Cyanobacteria|none|Cyanobacteria|none|Synechococcales|Prochloraceae|Prochlorococcus|Prochlorococcus_marinus|GCA_000015645
GCA_000332315.1	Cyanobacteria	Synechococcales	none	Cyanobacteria	Bacteria	none	Cyanobacteria	none	Synechococcales	Prochlorotrichaceae	Prochlorothrix	Prochlorothrix_hollandica	GCA_000332315	Cyanobacteria|none|Cyanobacteria|none|Synechococcales|Prochlorotrichaceae|Prochlorothrix|Prochlorothrix_hollandica|GCA_000332315	Cyanobacteria|none|Cyanobacteria|none|Synechococcales|Prochlorotrichaceae|Prochlorothrix|Prochlorothrix_hollandica|GCA_000332315
GCA_000317615.1	Cyanobacteria	Synechococcales	none	Cyanobacteria	Bacteria	none	Cyanobacteria	none	Synechococcales	Synechococcaceae	Dactylococcopsis	Dactylococcopsis_salina	GCA_000317615	Cyanobacteria|none|Cyanobacteria|none|Synechococcales|Synechococcaceae|Dactylococcopsis|Dactylococcopsis_salina|GCA_000317615	Cyanobacteria|none|Cyanobacteria|none|Synechococcales|Synechococcaceae|Dactylococcopsis|Dactylococcopsis_salina|GCA_000317615
GCA_000183405.1	Deferribacteres	Deferribacterales	Deferribacteres	Deferribacteres	Bacteria	none	Deferribacteres	Deferribacteres	Deferribacterales	Deferribacteraceae	Calditerrivibrio	Calditerrivibrio_nitroreducens	GCA_000183405	Deferribacteres|none|Deferribacteres|Deferribacteres|Deferribacterales|Deferribacteraceae|Calditerrivibrio|Calditerrivibrio_nitroreducens|GCA_000183405	Deferribacteres|none|Deferribacteres|Deferribacteres|Deferribacterales|Deferribacteraceae|Calditerrivibrio|Calditerrivibrio_nitroreducens|GCA_000183405
GCA_000010985.1	Deferribacteres	Deferribacterales	Deferribacteres	Deferribacteres	Bacteria	none	Deferribacteres	Deferribacteres	Deferribacterales	Deferribacteraceae	Deferribacter	Deferribacter_desulfuricans	GCA_000010985	Deferribacteres|none|Deferribacteres|Deferribacteres|Deferribacterales|Deferribacteraceae|Deferribacter|Deferribacter_desulfuricans|GCA_000010985	Deferribacteres|none|Deferribacteres|Deferribacteres|Deferribacterales|Deferribacteraceae|Deferribacter|Deferribacter_desulfuricans|GCA_000010985
GCA_001007995.1	Deinococcus-Thermus	Deinococcales	Deinococci	Deinococci	Bacteria	none	Deinococcus-Thermus	Deinococci	Deinococcales	Deinococcaceae	Deinococcus	Deinococcus_soli_Cha_et_al__2016	GCA_001007995	Deinococcus-Thermus|none|Deinococcus-Thermus|Deinococci|Deinococcales|Deinococcaceae|Deinococcus|Deinococcus_soli_Cha_et_al__2016|GCA_001007995	Deinococci|none|Deinococcus-Thermus|Deinococci|Deinococcales|Deinococcaceae|Deinococcus|Deinococcus_soli_Cha_et_al__2016|GCA_001007995
GCA_000092125.1	Deinococcus-Thermus	Thermales	Deinococci	Deinococci	Bacteria	none	Deinococcus-Thermus	Deinococci	Thermales	Thermaceae	Meiothermus	Meiothermus_silvanus	GCA_000092125	Deinococcus-Thermus|none|Deinococcus-Thermus|Deinococci|Thermales|Thermaceae|Meiothermus|Meiothermus_silvanus|GCA_000092125	Deinococci|none|Deinococcus-Thermus|Deinococci|Thermales|Thermaceae|Meiothermus|Meiothermus_silvanus|GCA_000092125
GCA_001399775.1	Deinococcus-Thermus	Thermales	Deinococci	Deinococci	Bacteria	none	Deinococcus-Thermus	Deinococci	Thermales	Thermaceae	Thermus	Thermus_aquaticus	GCA_001399775	Deinococcus-Thermus|none|Deinococcus-Thermus|Deinococci|Thermales|Thermaceae|Thermus|Thermus_aquaticus|GCA_001399775	Deinococci|none|Deinococcus-Thermus|Deinococci|Thermales|Thermaceae|Thermus|Thermus_aquaticus|GCA_001399775
GCA_000021645.1	Dictyoglomi	Dictyoglomales	Dictyoglomia	Dictyoglomia	Bacteria	none	Dictyoglomi	Dictyoglomia	Dictyoglomales	Dictyoglomaceae	Dictyoglomus	Dictyoglomus_turgidum	GCA_000021645	Dictyoglomi|none|Dictyoglomi|Dictyoglomia|Dictyoglomales|Dictyoglomaceae|Dictyoglomus|Dictyoglomus_turgidum|GCA_000021645	Dictyoglomia|none|Dictyoglomi|Dictyoglomia|Dictyoglomales|Dictyoglomaceae|Dictyoglomus|Dictyoglomus_turgidum|GCA_000021645
GCA_000020145.1	Elusimicrobia	Elusimicrobiales	Elusimicrobia	Elusimicrobia	Bacteria	none	Elusimicrobia	Elusimicrobia	Elusimicrobiales	Elusimicrobiaceae	Elusimicrobium	Elusimicrobium_minutum	GCA_000020145	Elusimicrobia|none|Elusimicrobia|Elusimicrobia|Elusimicrobiales|Elusimicrobiaceae|Elusimicrobium|Elusimicrobium_minutum|GCA_000020145	Elusimicrobia|none|Elusimicrobia|Elusimicrobia|Elusimicrobiales|Elusimicrobiaceae|Elusimicrobium|Elusimicrobium_minutum|GCA_000020145
GCA_002355835.1	Elusimicrobia	Endomicrobiales	Endomicrobia	Endomicrobia	Bacteria	none	Elusimicrobia	Endomicrobia	Endomicrobiales	Endomicrobiaceae	Endomicrobium	Candidatus_Endomicrobium_trichonymphae	GCA_002355835	Elusimicrobia|none|Elusimicrobia|Endomicrobia|Endomicrobiales|Endomicrobiaceae|Endomicrobium|Candidatus_Endomicrobium_trichonymphae|GCA_002355835	Endomicrobia|none|Elusimicrobia|Endomicrobia|Endomicrobiales|Endomicrobiaceae|Endomicrobium|Candidatus_Endomicrobium_trichonymphae|GCA_002355835
GCA_000474745.1	Fibrobacteres	Fibrobacteres	Chitinivibrionia	Chitinivibrionia	Bacteria	none	Fibrobacteres	Chitinivibrionia	Chitinivibrionales	Chitinivibrionaceae	Chitinivibrio	Chitinivibrio_alkaliphilus	GCA_000474745	Fibrobacteres|none|Fibrobacteres|Chitinivibrionia|Chitinivibrionales|Chitinivibrionaceae|Chitinivibrio|Chitinivibrio_alkaliphilus|GCA_000474745	Chitinivibrionia|none|Fibrobacteres|Chitinivibrionia|Chitinivibrionales|Chitinivibrionaceae|Chitinivibrio|Chitinivibrio_alkaliphilus|GCA_000474745
GCA_001552275.1	Firmicutes	Bacillales	Bacilli	Bacilli	Bacteria	none	Firmicutes	Bacilli	Bacillales	Bacillaceae	Amphibacillus	Amphibacillus_sediminis	GCA_001552275	Firmicutes|none|Firmicutes|Bacilli|Bacillales|Bacillaceae|Amphibacillus|Amphibacillus_sediminis|GCA_001552275	Bacilli|none|Firmicutes|Bacilli|Bacillales|Bacillaceae|Amphibacillus|Amphibacillus_sediminis|GCA_001552275
GCA_000423105.1	Firmicutes	Bacillales	Bacilli	Bacilli	Bacteria	none	Firmicutes	Bacilli	Bacillales	Bacillaceae	Halalkalibacillus	Halalkalibacillus_halophilus	GCA_000423105	Firmicutes|none|Firmicutes|Bacilli|Bacillales|Bacillaceae|Halalkalibacillus|Halalkalibacillus_halophilus|GCA_000423105	Bacilli|none|Firmicutes|Bacilli|Bacillales|Bacillaceae|Halalkalibacillus|Halalkalibacillus_halophilus|GCA_000423105
GCA_000011245.1	Firmicutes	Bacillales	Bacilli	Bacilli	Bacteria	none	Firmicutes	Bacilli	Bacillales	Bacillaceae	Oceanobacillus	Oceanobacillus_iheyensis	GCA_000011245	Firmicutes|none|Firmicutes|Bacilli|Bacillales|Bacillaceae|Oceanobacillus|Oceanobacillus_iheyensis|GCA_000011245	Bacilli|none|Firmicutes|Bacilli|Bacillales|Bacillaceae|Oceanobacillus|Oceanobacillus_iheyensis|GCA_000011245
GCA_900115805.1	Firmicutes	Bacillales	Bacilli	Bacilli	Bacteria	none	Firmicutes	Bacilli	Bacillales	Bacillaceae	Psychrobacillus	Psychrobacillus_psychrotolerans	GCA_900115805	Firmicutes|none|Firmicutes|Bacilli|Bacillales|Bacillaceae|Psychrobacillus|Psychrobacillus_psychrotolerans|GCA_900115805	Bacilli|none|Firmicutes|Bacilli|Bacillales|Bacillaceae|Psychrobacillus|Psychrobacillus_psychrotolerans|GCA_900115805
GCA_000812025.2	Firmicutes	Bacillales	Bacilli	Bacilli	Bacteria	none	Firmicutes	Bacilli	Bacillales	Bacillaceae	Quasibacillus	Quasibacillus_thermotolerans	GCA_000812025	Firmicutes|none|Firmicutes|Bacilli|Bacillales|Bacillaceae|Quasibacillus|Quasibacillus_thermotolerans|GCA_000812025	Bacilli|none|Firmicutes|Bacilli|Bacillales|Bacillaceae|Quasibacillus|Quasibacillus_thermotolerans|GCA_000812025
GCA_900111285.1	Firmicutes	Bacillales	Bacilli	Bacilli	Bacteria	none	Firmicutes	Bacilli	Bacillales	Bacillaceae	Salisediminibacterium	Salisediminibacterium_haloalkalitolerans	GCA_900111285	Firmicutes|none|Firmicutes|Bacilli|Bacillales|Bacillaceae|Salisediminibacterium|Salisediminibacterium_haloalkalitolerans|GCA_900111285	Bacilli|none|Firmicutes|Bacilli|Bacillales|Bacillaceae|Salisediminibacterium|Salisediminibacterium_haloalkalitolerans|GCA_900111285
GCA_001642725.1	Firmicutes	Bacillales	Bacilli	Bacilli	Bacteria	none	Firmicutes	Bacilli	Bacillales	none	Acidibacillus	Acidibacillus_ferrooxidans	GCA_001642725	Firmicutes|none|Firmicutes|Bacilli|Bacillales|none|Acidibacillus|Acidibacillus_ferrooxidans|GCA_001642725	Bacilli|none|Firmicutes|Bacilli|Bacillales|none|Acidibacillus|Acidibacillus_ferrooxidans|GCA_001642725
GCA_000227705.3	Firmicutes	Bacillales	Bacilli	Bacilli	Bacteria	none	Firmicutes	Bacilli	Bacillales	Paenibacillaceae	Thermobacillus	Thermobacillus_composti	GCA_000227705	Firmicutes|none|Firmicutes|Bacilli|Bacillales|Paenibacillaceae|Thermobacillus|Thermobacillus_composti|GCA_000227705	Bacilli|none|Firmicutes|Bacilli|Bacillales|Paenibacillaceae|Thermobacillus|Thermobacillus_composti|GCA_000227705
GCA_001700325.1	Firmicutes	Bacillales	Bacilli	Bacilli	Bacteria	none	Firmicutes	Bacilli	Bacillales	Planococcaceae	Caryophanon	Caryophanon_latum	GCA_001700325	Firmicutes|none|Firmicutes|Bacilli|Bacillales|Planococcaceae|Caryophanon|Caryophanon_latum|GCA_001700325	Bacilli|none|Firmicutes|Bacilli|Bacillales|Planococcaceae|Caryophanon|Caryophanon_latum|GCA_001700325
GCA_000706685.1	Firmicutes	Bacillales	Bacilli	Bacilli	Bacteria	none	Firmicutes	Bacilli	Bacillales	Staphylococcaceae	Staphylococcus	Staphylococcus_xylosus	GCA_000706685	Firmicutes|none|Firmicutes|Bacilli|Bacillales|Staphylococcaceae|Staphylococcus|Staphylococcus_xylosus|GCA_000706685	Bacilli|none|Firmicutes|Bacilli|Bacillales|Staphylococcaceae|Staphylococcus|Staphylococcus_xylosus|GCA_000706685
GCA_900106775.1	Firmicutes	Bacillales	Bacilli	Bacilli	Bacteria	none	Firmicutes	Bacilli	Bacillales	Thermoactinomycetaceae	Marininema	Marininema_mesophilum	GCA_900106775	Firmicutes|none|Firmicutes|Bacilli|Bacillales|Thermoactinomycetaceae|Marininema|Marininema_mesophilum|GCA_900106775	Bacilli|none|Firmicutes|Bacilli|Bacillales|Thermoactinomycetaceae|Marininema|Marininema_mesophilum|GCA_900106775
GCA_900114055.1	Firmicutes	Bacillales	Bacilli	Bacilli	Bacteria	none	Firmicutes	Bacilli	Bacillales	Thermoactinomycetaceae	Thermoflavimicrobium	Thermoflavimicrobium_dichotomicum	GCA_900114055	Firmicutes|none|Firmicutes|Bacilli|Bacillales|Thermoactinomycetaceae|Thermoflavimicrobium|Thermoflavimicrobium_dichotomicum|GCA_900114055	Bacilli|none|Firmicutes|Bacilli|Bacillales|Thermoactinomycetaceae|Thermoflavimicrobium|Thermoflavimicrobium_dichotomicum|GCA_900114055
GCA_900110675.1	Firmicutes	Lactobacillales	Bacilli	Bacilli	Bacteria	none	Firmicutes	Bacilli	Lactobacillales	Aerococcaceae	Ignavigranum	Ignavigranum_ruoffiae	GCA_900110675	Firmicutes|none|Firmicutes|Bacilli|Lactobacillales|Aerococcaceae|Ignavigranum|Ignavigranum_ruoffiae|GCA_900110675	Bacilli|none|Firmicutes|Bacilli|Lactobacillales|Aerococcaceae|Ignavigranum|Ignavigranum_ruoffiae|GCA_900110675
GCA_900113675.1	Firmicutes	Lactobacillales	Bacilli	Bacilli	Bacteria	none	Firmicutes	Bacilli	Lactobacillales	Carnobacteriaceae	Pisciglobus	Pisciglobus_halotolerans	GCA_900113675	Firmicutes|none|Firmicutes|Bacilli|Lactobacillales|Carnobacteriaceae|Pisciglobus|Pisciglobus_halotolerans|GCA_900113675	Bacilli|none|Firmicutes|Bacilli|Lactobacillales|Carnobacteriaceae|Pisciglobus|Pisciglobus_halotolerans|GCA_900113675
GCA_000421665.1	Firmicutes	Lactobacillales	Bacilli	Bacilli	Bacteria	none	Firmicutes	Bacilli	Lactobacillales	Enterococcaceae	Bavariicoccus	Bavariicoccus_seileri	GCA_000421665	Firmicutes|none|Firmicutes|Bacilli|Lactobacillales|Enterococcaceae|Bavariicoccus|Bavariicoccus_seileri|GCA_000421665	Bacilli|none|Firmicutes|Bacilli|Lactobacillales|Enterococcaceae|Bavariicoccus|Bavariicoccus_seileri|GCA_000421665
GCA_000420365.1	Firmicutes	Lactobacillales	Bacilli	Bacilli	Bacteria	none	Firmicutes	Bacilli	Lactobacillales	Leuconostocaceae	Weissella	Weissella_halotolerans	GCA_000420365	Firmicutes|none|Firmicutes|Bacilli|Lactobacillales|Leuconostocaceae|Weissella|Weissella_halotolerans|GCA_000420365	Bacilli|none|Firmicutes|Bacilli|Lactobacillales|Leuconostocaceae|Weissella|Weissella_halotolerans|GCA_000420365
GCA_000971665.1	Firmicutes	Lactobacillales	Bacilli	Bacilli	Bacteria	none	Firmicutes	Bacilli	Lactobacillales	Streptococcaceae	Streptococcus	Streptococcus_thermophilus	GCA_000971665	Firmicutes|none|Firmicutes|Bacilli|Lactobacillales|Streptococcaceae|Streptococcus|Streptococcus_thermophilus|GCA_000971665	Bacilli|none|Firmicutes|Bacilli|Lactobacillales|Streptococcaceae|Streptococcus|Streptococcus_thermophilus|GCA_000971665
GCA_000145275.1	Firmicutes	Clostridiales	Clostridia	Clostridia	Bacteria	none	Firmicutes	Clostridia	Clostridiales	Clostridiaceae	Clostridium	Clostridium_cellulovorans	GCA_000145275	Firmicutes|none|Firmicutes|Clostridia|Clostridiales|Clostridiaceae|Clostridium|Clostridium_cellulovorans|GCA_000145275	Clostridia|none|Firmicutes|Clostridia|Clostridiales|Clostridiaceae|Clostridium|Clostridium_cellulovorans|GCA_000145275
GCA_900142245.1	Firmicutes	Clostridiales	Clostridia	Clostridia	Bacteria	none	Firmicutes	Clostridia	Clostridiales	Clostridiaceae	Paramaledivibacter	Paramaledivibacter_caminithermalis	GCA_900142245	Firmicutes|none|Firmicutes|Clostridia|Clostridiales|Clostridiaceae|Paramaledivibacter|Paramaledivibacter_caminithermalis|GCA_900142245	Clostridia|none|Firmicutes|Clostridia|Clostridiales|Clostridiaceae|Paramaledivibacter|Paramaledivibacter_caminithermalis|GCA_900142245
GCA_002998925.1	Firmicutes	Clostridiales	Clostridia	Clostridia	Bacteria	none	Firmicutes	Clostridia	Clostridiales	Clostridiales_Family_XIII__Incertae_Sedis	Mogibacterium	Mogibacterium_diversum	GCA_002998925	Firmicutes|none|Firmicutes|Clostridia|Clostridiales|Clostridiales_Family_XIII__Incertae_Sedis|Mogibacterium|Mogibacterium_diversum|GCA_002998925	Clostridia|none|Firmicutes|Clostridia|Clostridiales|Clostridiales_Family_XIII__Incertae_Sedis|Mogibacterium|Mogibacterium_diversum|GCA_002998925
GCA_000184705.1	Firmicutes	Clostridiales	Clostridia	Clostridia	Bacteria	none	Firmicutes	Clostridia	Clostridiales	Clostridiales_Family_XVII__Incertae_Sedis	Thermaerobacter	Thermaerobacter_marianensis	GCA_000184705	Firmicutes|none|Firmicutes|Clostridia|Clostridiales|Clostridiales_Family_XVII__Incertae_Sedis|Thermaerobacter|Thermaerobacter_marianensis|GCA_000184705	Clostridia|none|Firmicutes|Clostridia|Clostridiales|Clostridiales_Family_XVII__Incertae_Sedis|Thermaerobacter|Thermaerobacter_marianensis|GCA_000184705
GCA_000185385.1	Firmicutes	Clostridiales	Clostridia	Clostridia	Bacteria	none	Firmicutes	Clostridia	Clostridiales	Lachnospiraceae	Lachnoanaerobaculum	Lachnoanaerobaculum_saburreum	GCA_000185385	Firmicutes|none|Firmicutes|Clostridia|Clostridiales|Lachnospiraceae|Lachnoanaerobaculum|Lachnoanaerobaculum_saburreum|GCA_000185385	Clostridia|none|Firmicutes|Clostridia|Clostridiales|Lachnospiraceae|Lachnoanaerobaculum|Lachnoanaerobaculum_saburreum|GCA_000185385
GCA_000225345.1	Firmicutes	Clostridiales	Clostridia	Clostridia	Bacteria	none	Firmicutes	Clostridia	Clostridiales	Lachnospiraceae	Roseburia	Roseburia_hominis	GCA_000225345	Firmicutes|none|Firmicutes|Clostridia|Clostridiales|Lachnospiraceae|Roseburia|Roseburia_hominis|GCA_000225345	Clostridia|none|Firmicutes|Clostridia|Clostridiales|Lachnospiraceae|Roseburia|Roseburia_hominis|GCA_000225345
GCA_900188145.1	Firmicutes	Clostridiales	Clostridia	Clostridia	Bacteria	none	Firmicutes	Clostridia	Clostridiales	none	Anaerovirgula	Anaerovirgula_multivorans	GCA_900188145	Firmicutes|none|Firmicutes|Clostridia|Clostridiales|none|Anaerovirgula|Anaerovirgula_multivorans|GCA_900188145	Clostridia|none|Firmicutes|Clostridia|Clostridiales|none|Anaerovirgula|Anaerovirgula_multivorans|GCA_900188145
GCA_000283575.1	Firmicutes	Clostridiales	Clostridia	Clostridia	Bacteria	none	Firmicutes	Clostridia	Clostridiales	Oscillospiraceae	Oscillibacter	Oscillibacter_valericigenes	GCA_000283575	Firmicutes|none|Firmicutes|Clostridia|Clostridiales|Oscillospiraceae|Oscillibacter|Oscillibacter_valericigenes|GCA_000283575	Clostridia|none|Firmicutes|Clostridia|Clostridiales|Oscillospiraceae|Oscillibacter|Oscillibacter_valericigenes|GCA_000283575
GCA_900142025.1	Firmicutes	Clostridiales	Clostridia	Clostridia	Bacteria	none	Firmicutes	Clostridia	Clostridiales	Peptococcaceae	Desulfofundulus	Desulfofundulus_thermosubterraneus	GCA_900142025	Firmicutes|none|Firmicutes|Clostridia|Clostridiales|Peptococcaceae|Desulfofundulus|Desulfofundulus_thermosubterraneus|GCA_900142025	Clostridia|none|Firmicutes|Clostridia|Clostridiales|Peptococcaceae|Desulfofundulus|Desulfofundulus_thermosubterraneus|GCA_900142025
GCA_000255115.3	Firmicutes	Clostridiales	Clostridia	Clostridia	Bacteria	none	Firmicutes	Clostridia	Clostridiales	Peptococcaceae	Desulfosporosinus	Desulfosporosinus_acidiphilus	GCA_000255115	Firmicutes|none|Firmicutes|Clostridia|Clostridiales|Peptococcaceae|Desulfosporosinus|Desulfosporosinus_acidiphilus|GCA_000255115	Clostridia|none|Firmicutes|Clostridia|Clostridiales|Peptococcaceae|Desulfosporosinus|Desulfosporosinus_acidiphilus|GCA_000255115
GCA_900101835.1	Firmicutes	Clostridiales	Clostridia	Clostridia	Bacteria	none	Firmicutes	Clostridia	Clostridiales	Peptococcaceae	Peptococcus	Peptococcus_niger	GCA_900101835	Firmicutes|none|Firmicutes|Clostridia|Clostridiales|Peptococcaceae|Peptococcus|Peptococcus_niger|GCA_900101835	Clostridia|none|Firmicutes|Clostridia|Clostridiales|Peptococcaceae|Peptococcus|Peptococcus_niger|GCA_900101835
GCA_000439105.1	Firmicutes	Clostridiales	Clostridia	Clostridia	Bacteria	none	Firmicutes	Clostridia	Clostridiales	Peptostreptococcaceae	Terrisporobacter	Terrisporobacter_glycolicus	GCA_000439105	Firmicutes|none|Firmicutes|Clostridia|Clostridiales|Peptostreptococcaceae|Terrisporobacter|Terrisporobacter_glycolicus|GCA_000439105	Clostridia|none|Firmicutes|Clostridia|Clostridiales|Peptostreptococcaceae|Terrisporobacter|Terrisporobacter_glycolicus|GCA_000439105
GCA_001049915.1	Firmicutes	Clostridiales	Clostridia	Clostridia	Bacteria	none	Firmicutes	Clostridia	Clostridiales	Ruminococcaceae	Drancourtella	Drancourtella_massiliensis	GCA_001049915	Firmicutes|none|Firmicutes|Clostridia|Clostridiales|Ruminococcaceae|Drancourtella|Drancourtella_massiliensis|GCA_001049915	Clostridia|none|Firmicutes|Clostridia|Clostridiales|Ruminococcaceae|Drancourtella|Drancourtella_massiliensis|GCA_001049915
GCA_900167555.1	Firmicutes	Clostridiales	Clostridia	Clostridia	Bacteria	none	Firmicutes	Clostridia	Clostridiales	Ruminococcaceae	Gemmiger	Gemmiger_formicilis	GCA_900167555	Firmicutes|none|Firmicutes|Clostridia|Clostridiales|Ruminococcaceae|Gemmiger|Gemmiger_formicilis|GCA_900167555	Clostridia|none|Firmicutes|Clostridia|Clostridiales|Ruminococcaceae|Gemmiger|Gemmiger_formicilis|GCA_900167555
GCA_900186535.1	Firmicutes	Clostridiales	Clostridia	Clostridia	Bacteria	none	Firmicutes	Clostridia	Clostridiales	Ruminococcaceae	Marasmitruncus	Marasmitruncus_massiliensis	GCA_900186535	Firmicutes|none|Firmicutes|Clostridia|Clostridiales|Ruminococcaceae|Marasmitruncus|Marasmitruncus_massiliensis|GCA_900186535	Clostridia|none|Firmicutes|Clostridia|Clostridiales|Ruminococcaceae|Marasmitruncus|Marasmitruncus_massiliensis|GCA_900186535
GCA_000179635.2	Firmicutes	Clostridiales	Clostridia	Clostridia	Bacteria	none	Firmicutes	Clostridia	Clostridiales	Ruminococcaceae	Ruminococcus	Ruminococcus_albus	GCA_000179635	Firmicutes|none|Firmicutes|Clostridia|Clostridiales|Ruminococcaceae|Ruminococcus|Ruminococcus_albus|GCA_000179635	Clostridia|none|Firmicutes|Clostridia|Clostridiales|Ruminococcaceae|Ruminococcus|Ruminococcus_albus|GCA_000179635
GCA_000014725.1	Firmicutes	Clostridiales	Clostridia	Clostridia	Bacteria	none	Firmicutes	Clostridia	Clostridiales	Syntrophomonadaceae	Syntrophomonas	Syntrophomonas_wolfei	GCA_000014725	Firmicutes|none|Firmicutes|Clostridia|Clostridiales|Syntrophomonadaceae|Syntrophomonas|Syntrophomonas_wolfei|GCA_000014725	Clostridia|none|Firmicutes|Clostridia|Clostridiales|Syntrophomonadaceae|Syntrophomonas|Syntrophomonas_wolfei|GCA_000014725
GCA_000517025.1	Firmicutes	Halanaerobiales	Clostridia	Clostridia	Bacteria	none	Firmicutes	Clostridia	Halanaerobiales	Halobacteroidaceae	Halonatronum	Halonatronum_saccharophilum	GCA_000517025	Firmicutes|none|Firmicutes|Clostridia|Halanaerobiales|Halobacteroidaceae|Halonatronum|Halonatronum_saccharophilum|GCA_000517025	Clostridia|none|Firmicutes|Clostridia|Halanaerobiales|Halobacteroidaceae|Halonatronum|Halonatronum_saccharophilum|GCA_000517025
GCA_000007085.1	Firmicutes	Thermoanaerobacterales	Clostridia	Clostridia	Bacteria	none	Firmicutes	Clostridia	Thermoanaerobacterales	Thermoanaerobacteraceae	Caldanaerobacter	Caldanaerobacter_subterraneus	GCA_000007085	Firmicutes|none|Firmicutes|Clostridia|Thermoanaerobacterales|Thermoanaerobacteraceae|Caldanaerobacter|Caldanaerobacter_subterraneus|GCA_000007085	Clostridia|none|Firmicutes|Clostridia|Thermoanaerobacterales|Thermoanaerobacteraceae|Caldanaerobacter|Caldanaerobacter_subterraneus|GCA_000007085
GCA_000144645.1	Firmicutes	Thermoanaerobacterales	Clostridia	Clostridia	Bacteria	none	Firmicutes	Clostridia	Thermoanaerobacterales	Thermoanaerobacterales_Family_III__Incertae_Sedis	Thermosediminibacter	Thermosediminibacter_oceani	GCA_000144645	Firmicutes|none|Firmicutes|Clostridia|Thermoanaerobacterales|Thermoanaerobacterales_Family_III__Incertae_Sedis|Thermosediminibacter|Thermosediminibacter_oceani|GCA_000144645	Clostridia|none|Firmicutes|Clostridia|Thermoanaerobacterales|Thermoanaerobacterales_Family_III__Incertae_Sedis|Thermosediminibacter|Thermosediminibacter_oceani|GCA_000144645
GCA_000177375.1	Firmicutes	Erysipelotrichales	Erysipelotrichia	Erysipelotrichia	Bacteria	none	Firmicutes	Erysipelotrichia	Erysipelotrichales	Erysipelotrichaceae	Bulleidia	Bulleidia_extructa	GCA_000177375	Firmicutes|none|Firmicutes|Erysipelotrichia|Erysipelotrichales|Erysipelotrichaceae|Bulleidia|Bulleidia_extructa|GCA_000177375	Erysipelotrichia|none|Firmicutes|Erysipelotrichia|Erysipelotrichales|Erysipelotrichaceae|Bulleidia|Bulleidia_extructa|GCA_000177375
GCA_000154485.1	Firmicutes	Erysipelotrichales	Erysipelotrichia	Erysipelotrichia	Bacteria	none	Firmicutes	Erysipelotrichia	Erysipelotrichales	Erysipelotrichaceae	Erysipelatoclostridium	Erysipelatoclostridium_ramosum	GCA_000154485	Firmicutes|none|Firmicutes|Erysipelotrichia|Erysipelotrichales|Erysipelotrichaceae|Erysipelatoclostridium|Erysipelatoclostridium_ramosum|GCA_000154485	Erysipelotrichia|none|Firmicutes|Erysipelotrichia|Erysipelotrichales|Erysipelotrichaceae|Erysipelatoclostridium|Erysipelatoclostridium_ramosum|GCA_000154485
GCA_001945525.1	Firmicutes	Erysipelotrichales	Erysipelotrichia	Erysipelotrichia	Bacteria	none	Firmicutes	Erysipelotrichia	Erysipelotrichales	Erysipelotrichaceae	Ileibacterium	Ileibacterium_valens	GCA_001945525	Firmicutes|none|Firmicutes|Erysipelotrichia|Erysipelotrichales|Erysipelotrichaceae|Ileibacterium|Ileibacterium_valens|GCA_001945525	Erysipelotrichia|none|Firmicutes|Erysipelotrichia|Erysipelotrichales|Erysipelotrichaceae|Ileibacterium|Ileibacterium_valens|GCA_001945525
GCA_000430605.1	Firmicutes	Selenomonadales	Negativicutes	Negativicutes	Bacteria	none	Firmicutes	Negativicutes	Selenomonadales	Sporomusaceae	Anaeroarcus	Anaeroarcus_burkinensis	GCA_000430605	Firmicutes|none|Firmicutes|Negativicutes|Selenomonadales|Sporomusaceae|Anaeroarcus|Anaeroarcus_burkinensis|GCA_000430605	Negativicutes|none|Firmicutes|Negativicutes|Selenomonadales|Sporomusaceae|Anaeroarcus|Anaeroarcus_burkinensis|GCA_000430605
GCA_900110485.1	Firmicutes	Selenomonadales	Negativicutes	Negativicutes	Bacteria	none	Firmicutes	Negativicutes	Selenomonadales	Sporomusaceae	Propionispora	Propionispora_vibrioides	GCA_900110485	Firmicutes|none|Firmicutes|Negativicutes|Selenomonadales|Sporomusaceae|Propionispora|Propionispora_vibrioides|GCA_900110485	Negativicutes|none|Firmicutes|Negativicutes|Selenomonadales|Sporomusaceae|Propionispora|Propionispora_vibrioides|GCA_900110485
GCA_000239275.1	Firmicutes	Veillonellales	Negativicutes	Negativicutes	Bacteria	none	Firmicutes	Negativicutes	Veillonellales	Veillonellaceae	Anaeroglobus	Anaeroglobus_geminatus	GCA_000239275	Firmicutes|none|Firmicutes|Negativicutes|Veillonellales|Veillonellaceae|Anaeroglobus|Anaeroglobus_geminatus|GCA_000239275	Negativicutes|none|Firmicutes|Negativicutes|Veillonellales|Veillonellaceae|Anaeroglobus|Anaeroglobus_geminatus|GCA_000239275
GCA_900155405.1	Firmicutes	Veillonellales	Negativicutes	Negativicutes	Bacteria	none	Firmicutes	Negativicutes	Veillonellales	Veillonellaceae	Negativicoccus	Negativicoccus_massiliensis	GCA_900155405	Firmicutes|none|Firmicutes|Negativicutes|Veillonellales|Veillonellaceae|Negativicoccus|Negativicoccus_massiliensis|GCA_900155405	Negativicutes|none|Firmicutes|Negativicutes|Veillonellales|Veillonellaceae|Negativicoccus|Negativicoccus_massiliensis|GCA_900155405
GCA_900142005.1	Firmicutes	Tissierellales	Tissierellia	Tissierellia	Bacteria	none	Firmicutes	Tissierellia	none	none	Dethiosulfatibacter	Dethiosulfatibacter_aminovorans	GCA_900142005	Firmicutes|none|Firmicutes|Tissierellia|none|none|Dethiosulfatibacter|Dethiosulfatibacter_aminovorans|GCA_900142005	Tissierellia|none|Firmicutes|Tissierellia|none|none|Dethiosulfatibacter|Dethiosulfatibacter_aminovorans|GCA_900142005
GCA_900106765.1	Firmicutes	Tissierellales	Tissierellia	Tissierellia	Bacteria	none	Firmicutes	Tissierellia	none	none	Tepidimicrobium	Tepidimicrobium_xylanilyticum	GCA_900106765	Firmicutes|none|Firmicutes|Tissierellia|none|none|Tepidimicrobium|Tepidimicrobium_xylanilyticum|GCA_900106765	Tissierellia|none|Firmicutes|Tissierellia|none|none|Tepidimicrobium|Tepidimicrobium_xylanilyticum|GCA_900106765
GCA_900290095.1	Firmicutes	Tissierellales	Tissierellia	Tissierellia	Bacteria	none	Firmicutes	Tissierellia	Tissierellales	Peptoniphilaceae	Khoudiadiopia	Khoudiadiopia_massiliensis	GCA_900290095	Firmicutes|none|Firmicutes|Tissierellia|Tissierellales|Peptoniphilaceae|Khoudiadiopia|Khoudiadiopia_massiliensis|GCA_900290095	Tissierellia|none|Firmicutes|Tissierellia|Tissierellales|Peptoniphilaceae|Khoudiadiopia|Khoudiadiopia_massiliensis|GCA_900290095
GCA_000426625.1	Fusobacteria	Fusobacteriales	Fusobacteriia	Fusobacteriia	Bacteria	none	Fusobacteria	Fusobacteriia	Fusobacteriales	Fusobacteriaceae	Psychrilyobacter	Psychrilyobacter_atlanticus	GCA_000426625	Fusobacteria|none|Fusobacteria|Fusobacteriia|Fusobacteriales|Fusobacteriaceae|Psychrilyobacter|Psychrilyobacter_atlanticus|GCA_000426625	Fusobacteriia|none|Fusobacteria|Fusobacteriia|Fusobacteriales|Fusobacteriaceae|Psychrilyobacter|Psychrilyobacter_atlanticus|GCA_000426625
GCA_000023905.1	Fusobacteria	Fusobacteriales	Fusobacteriia	Fusobacteriia	Bacteria	none	Fusobacteria	Fusobacteriia	Fusobacteriales	Leptotrichiaceae	Leptotrichia	Leptotrichia_buccalis	GCA_000023905	Fusobacteria|none|Fusobacteria|Fusobacteriia|Fusobacteriales|Leptotrichiaceae|Leptotrichia|Leptotrichia_buccalis|GCA_000023905	Fusobacteriia|none|Fusobacteria|Fusobacteriia|Fusobacteriales|Leptotrichiaceae|Leptotrichia|Leptotrichia_buccalis|GCA_000023905
GCA_000973085.1	Fusobacteria	Fusobacteriales	Fusobacteriia	Fusobacteriia	Bacteria	none	Fusobacteria	Fusobacteriia	Fusobacteriales	Leptotrichiaceae	Sneathia	Sneathia_amnii	GCA_000973085	Fusobacteria|none|Fusobacteria|Fusobacteriia|Fusobacteriales|Leptotrichiaceae|Sneathia|Sneathia_amnii|GCA_000973085	Fusobacteriia|none|Fusobacteria|Fusobacteriia|Fusobacteriales|Leptotrichiaceae|Sneathia|Sneathia_amnii|GCA_000973085
GCA_000695095.2	Gemmatimonadetes	Gemmatimonadales	Gemmatimonadetes	Gemmatimonadetes	Bacteria	none	Gemmatimonadetes	Gemmatimonadetes	Gemmatimonadales	Gemmatimonadaceae	Gemmatimonas	Gemmatimonas_phototrophica	GCA_000695095	Gemmatimonadetes|none|Gemmatimonadetes|Gemmatimonadetes|Gemmatimonadales|Gemmatimonadaceae|Gemmatimonas|Gemmatimonas_phototrophica|GCA_000695095	Gemmatimonadetes|none|Gemmatimonadetes|Gemmatimonadetes|Gemmatimonadales|Gemmatimonadaceae|Gemmatimonas|Gemmatimonas_phototrophica|GCA_000695095
GCA_000258405.1	Ignavibacteriae	Ignavibacteriae	Ignavibacteria	Ignavibacteria	Bacteria	none	Ignavibacteriae	Ignavibacteria	Ignavibacteriales	Ignavibacteriaceae	Ignavibacterium	Ignavibacterium_album	GCA_000258405	Ignavibacteriae|none|Ignavibacteriae|Ignavibacteria|Ignavibacteriales|Ignavibacteriaceae|Ignavibacterium|Ignavibacterium_album|GCA_000258405	Ignavibacteria|none|Ignavibacteriae|Ignavibacteria|Ignavibacteriales|Ignavibacteriaceae|Ignavibacterium|Ignavibacterium_album|GCA_000258405
GCA_001017655.1	Kiritimatiellaeota	Kiritimatiellaeota	Kiritimatiellae	Kiritimatiellae	Bacteria	none	Kiritimatiellaeota	Kiritimatiellae	Kiritimatiellales	Kiritimatiellaceae	Kiritimatiella	Kiritimatiella_glycovorans	GCA_001017655	Kiritimatiellaeota|none|Kiritimatiellaeota|Kiritimatiellae|Kiritimatiellales|Kiritimatiellaceae|Kiritimatiella|Kiritimatiella_glycovorans|GCA_001017655	Kiritimatiellae|none|Kiritimatiellaeota|Kiritimatiellae|Kiritimatiellales|Kiritimatiellaceae|Kiritimatiella|Kiritimatiella_glycovorans|GCA_001017655
GCA_001771235.1	KSB1	KSB1	none	none	Bacteria	none	KSB1	none	none	none	none	candidate_division_KSB1_bacterium_RBG_16_48_16	GCA_001771235	KSB1|none|KSB1|none|none|none|none|candidate_division_KSB1_bacterium_RBG_16_48_16|GCA_001771235	none|none|KSB1|none|none|none|none|candidate_division_KSB1_bacterium_RBG_16_48_16|GCA_001771235
GCA_002998355.1	Lentisphaerae	Lentisphaerae	Lentisphaeria	Lentisphaeria	Bacteria	none	Lentisphaerae	Lentisphaeria	Victivallales	none	none	Victivallales_bacterium_CCUG_44730	GCA_002998355	Lentisphaerae|none|Lentisphaerae|Lentisphaeria|Victivallales|none|none|Victivallales_bacterium_CCUG_44730|GCA_002998355	Lentisphaeria|none|Lentisphaerae|Lentisphaeria|Victivallales|none|none|Victivallales_bacterium_CCUG_44730|GCA_002998355
GCA_000341545.2	Nitrospinae	Nitrospinae	Nitrospinia	Nitrospinia	Bacteria	none	Nitrospinae	Nitrospinia	Nitrospinales	Nitrospinaceae	Nitrospina	Nitrospina_gracilis	GCA_000341545	Nitrospinae|none|Nitrospinae|Nitrospinia|Nitrospinales|Nitrospinaceae|Nitrospina|Nitrospina_gracilis|GCA_000341545	Nitrospinia|none|Nitrospinae|Nitrospinia|Nitrospinales|Nitrospinaceae|Nitrospina|Nitrospina_gracilis|GCA_000341545
GCA_000284315.1	Nitrospirae	Nitrospirae	Nitrospira	Nitrospira	Bacteria	none	Nitrospirae	Nitrospira	Nitrospirales	Nitrospiraceae	Leptospirillum	Leptospirillum_ferrooxidans	GCA_000284315	Nitrospirae|none|Nitrospirae|Nitrospira|Nitrospirales|Nitrospiraceae|Leptospirillum|Leptospirillum_ferrooxidans|GCA_000284315	Nitrospira|none|Nitrospirae|Nitrospira|Nitrospirales|Nitrospiraceae|Leptospirillum|Leptospirillum_ferrooxidans|GCA_000284315
GCA_001273775.1	Nitrospirae	Nitrospirae	Nitrospira	Nitrospira	Bacteria	none	Nitrospirae	Nitrospira	Nitrospirales	Nitrospiraceae	Nitrospira	Nitrospira_moscoviensis	GCA_001273775	Nitrospirae|none|Nitrospirae|Nitrospira|Nitrospirales|Nitrospiraceae|Nitrospira|Nitrospira_moscoviensis|GCA_001273775	Nitrospira|none|Nitrospirae|Nitrospira|Nitrospirales|Nitrospiraceae|Nitrospira|Nitrospira_moscoviensis|GCA_001273775
GCA_000020985.1	Nitrospirae	Nitrospirae	Nitrospira	Nitrospira	Bacteria	none	Nitrospirae	Nitrospira	Nitrospirales	Nitrospiraceae	Thermodesulfovibrio	Thermodesulfovibrio_yellowstonii	GCA_000020985	Nitrospirae|none|Nitrospirae|Nitrospira|Nitrospirales|Nitrospiraceae|Thermodesulfovibrio|Thermodesulfovibrio_yellowstonii|GCA_000020985	Nitrospira|none|Nitrospirae|Nitrospira|Nitrospirales|Nitrospiraceae|Thermodesulfovibrio|Thermodesulfovibrio_yellowstonii|GCA_000020985
GCA_000423865.1	Nitrospirae	Nitrospirae	Nitrospira	Nitrospira	Bacteria	none	Nitrospirae	Nitrospira	Nitrospirales	Nitrospiraceae	Thermodesulfovibrio	Thermodesulfovibrio_thiophilus	GCA_000423865	Nitrospirae|none|Nitrospirae|Nitrospira|Nitrospirales|Nitrospiraceae|Thermodesulfovibrio|Thermodesulfovibrio_thiophilus|GCA_000423865	Nitrospira|none|Nitrospirae|Nitrospira|Nitrospirales|Nitrospiraceae|Thermodesulfovibrio|Thermodesulfovibrio_thiophilus|GCA_000423865
GCA_002117005.1	Planctomycetes	Phycisphaerales	Phycisphaerae	Phycisphaerae	Bacteria	none	Planctomycetes	Phycisphaerae	Phycisphaerales	none	none	Phycisphaerae_bacterium_ST-PulAB-D4	GCA_002117005	Planctomycetes|none|Planctomycetes|Phycisphaerae|Phycisphaerales|none|none|Phycisphaerae_bacterium_ST-PulAB-D4|GCA_002117005	Phycisphaerae|none|Planctomycetes|Phycisphaerae|Phycisphaerales|none|none|Phycisphaerae_bacterium_ST-PulAB-D4|GCA_002117005
GCA_000284115.1	Planctomycetes	Phycisphaerales	Phycisphaerae	Phycisphaerae	Bacteria	none	Planctomycetes	Phycisphaerae	Phycisphaerales	Phycisphaeraceae	Phycisphaera	Phycisphaera_mikurensis	GCA_000284115	Planctomycetes|none|Planctomycetes|Phycisphaerae|Phycisphaerales|Phycisphaeraceae|Phycisphaera|Phycisphaera_mikurensis|GCA_000284115	Phycisphaerae|none|Planctomycetes|Phycisphaerae|Phycisphaerales|Phycisphaeraceae|Phycisphaera|Phycisphaera_mikurensis|GCA_000284115
GCA_900232105.1	Planctomycetes	Candidatus_Brocadiales	Planctomycetia	Planctomycetia	Bacteria	none	Planctomycetes	Planctomycetia	Candidatus_Brocadiales	Candidatus_Brocadiaceae	Candidatus_Kuenenia	Candidatus_Kuenenia_stuttgartiensis	GCA_900232105	Planctomycetes|none|Planctomycetes|Planctomycetia|Candidatus_Brocadiales|Candidatus_Brocadiaceae|Candidatus_Kuenenia|Candidatus_Kuenenia_stuttgartiensis|GCA_900232105	Planctomycetia|none|Planctomycetes|Planctomycetia|Candidatus_Brocadiales|Candidatus_Brocadiaceae|Candidatus_Kuenenia|Candidatus_Kuenenia_stuttgartiensis|GCA_900232105
GCA_000186345.1	Planctomycetes	Planctomycetales	Planctomycetia	Planctomycetia	Bacteria	none	Planctomycetes	Planctomycetia	Planctomycetales	Isosphaeraceae	Isosphaera	Isosphaera_pallida	GCA_000186345	Planctomycetes|none|Planctomycetes|Planctomycetia|Planctomycetales|Isosphaeraceae|Isosphaera|Isosphaera_pallida|GCA_000186345	Planctomycetia|none|Planctomycetes|Planctomycetia|Planctomycetales|Isosphaeraceae|Isosphaera|Isosphaera_pallida|GCA_000186345
GCA_000153105.1	Planctomycetes	Planctomycetales	Planctomycetia	Planctomycetia	Bacteria	none	Planctomycetes	Planctomycetia	Planctomycetales	Planctomycetaceae	Blastopirellula	Blastopirellula_marina	GCA_000153105	Planctomycetes|none|Planctomycetes|Planctomycetia|Planctomycetales|Planctomycetaceae|Blastopirellula|Blastopirellula_marina|GCA_000153105	Planctomycetia|none|Planctomycetes|Planctomycetia|Planctomycetales|Planctomycetaceae|Blastopirellula|Blastopirellula_marina|GCA_000153105
GCA_001983935.1	Planctomycetes	Planctomycetales	Planctomycetia	Planctomycetia	Bacteria	none	Planctomycetes	Planctomycetia	Planctomycetales	Planctomycetaceae	Fuerstia	Fuerstia_marisgermanicae	GCA_001983935	Planctomycetes|none|Planctomycetes|Planctomycetia|Planctomycetales|Planctomycetaceae|Fuerstia|Fuerstia_marisgermanicae|GCA_001983935	Planctomycetia|none|Planctomycetes|Planctomycetia|Planctomycetales|Planctomycetaceae|Fuerstia|Fuerstia_marisgermanicae|GCA_001983935
GCA_001642915.1	Planctomycetes	Planctomycetales	Planctomycetia	Planctomycetia	Bacteria	none	Planctomycetes	Planctomycetia	Planctomycetales	Planctomycetaceae	Roseimaritima	Roseimaritima_ulvae	GCA_001642915	Planctomycetes|none|Planctomycetes|Planctomycetia|Planctomycetales|Planctomycetaceae|Roseimaritima|Roseimaritima_ulvae|GCA_001642915	Planctomycetia|none|Planctomycetes|Planctomycetia|Planctomycetales|Planctomycetaceae|Roseimaritima|Roseimaritima_ulvae|GCA_001642915
GCA_002770575.1	Proteobacteria	Caulobacterales	Alphaproteobacteria	Alphaproteobacteria	Bacteria	none	Proteobacteria	Alphaproteobacteria	Caulobacterales	Caulobacteraceae	Brevundimonas	Brevundimonas_denitrificans	GCA_002770575	Proteobacteria|none|Proteobacteria|Alphaproteobacteria|Caulobacterales|Caulobacteraceae|Brevundimonas|Brevundimonas_denitrificans|GCA_002770575	Alphaproteobacteria|none|Proteobacteria|Alphaproteobacteria|Caulobacterales|Caulobacteraceae|Brevundimonas|Brevundimonas_denitrificans|GCA_002770575
GCA_000014865.1	Proteobacteria	Magnetococcales	Alphaproteobacteria	Alphaproteobacteria	Bacteria	none	Proteobacteria	Alphaproteobacteria	Magnetococcales	Magnetococcaceae	Magnetococcus	Magnetococcus_marinus	GCA_000014865	Proteobacteria|none|Proteobacteria|Alphaproteobacteria|Magnetococcales|Magnetococcaceae|Magnetococcus|Magnetococcus_marinus|GCA_000014865	Alphaproteobacteria|none|Proteobacteria|Alphaproteobacteria|Magnetococcales|Magnetococcaceae|Magnetococcus|Magnetococcus_marinus|GCA_000014865
GCA_000024465.1	Proteobacteria	Alphaproteobacteria	Alphaproteobacteria	Alphaproteobacteria	Bacteria	none	Proteobacteria	Alphaproteobacteria	none	none	Candidatus_Puniceispirillum	Candidatus_Puniceispirillum_marinum	GCA_000024465	Proteobacteria|none|Proteobacteria|Alphaproteobacteria|none|none|Candidatus_Puniceispirillum|Candidatus_Puniceispirillum_marinum|GCA_000024465	Alphaproteobacteria|none|Proteobacteria|Alphaproteobacteria|none|none|Candidatus_Puniceispirillum|Candidatus_Puniceispirillum_marinum|GCA_000024465
GCA_002937505.1	Proteobacteria	Alphaproteobacteria_unass	Alphaproteobacteria	Alphaproteobacteria	Bacteria	none	Proteobacteria	Alphaproteobacteria	none	none	none	Alphaproteobacteria_bacterium_MarineAlpha12_Bin1	GCA_002937505	Proteobacteria|none|Proteobacteria|Alphaproteobacteria|none|none|none|Alphaproteobacteria_bacterium_MarineAlpha12_Bin1|GCA_002937505	Alphaproteobacteria|none|Proteobacteria|Alphaproteobacteria|none|none|none|Alphaproteobacteria_bacterium_MarineAlpha12_Bin1|GCA_002937505
GCA_002937525.1	Proteobacteria	Alphaproteobacteria_unass	Alphaproteobacteria	Alphaproteobacteria	Bacteria	none	Proteobacteria	Alphaproteobacteria	none	none	none	Alphaproteobacteria_bacterium_MarineAlpha10_Bin3	GCA_002937525	Proteobacteria|none|Proteobacteria|Alphaproteobacteria|none|none|none|Alphaproteobacteria_bacterium_MarineAlpha10_Bin3|GCA_002937525	Alphaproteobacteria|none|Proteobacteria|Alphaproteobacteria|none|none|none|Alphaproteobacteria_bacterium_MarineAlpha10_Bin3|GCA_002937525
GCA_002937625.1	Proteobacteria	Alphaproteobacteria_unass	Alphaproteobacteria	Alphaproteobacteria	Bacteria	none	Proteobacteria	Alphaproteobacteria	none	none	none	Alphaproteobacteria_bacterium_MarineAlpha9_Bin4	GCA_002937625	Proteobacteria|none|Proteobacteria|Alphaproteobacteria|none|none|none|Alphaproteobacteria_bacterium_MarineAlpha9_Bin4|GCA_002937625	Alphaproteobacteria|none|Proteobacteria|Alphaproteobacteria|none|none|none|Alphaproteobacteria_bacterium_MarineAlpha9_Bin4|GCA_002937625
GCA_002937855.1	Proteobacteria	Alphaproteobacteria_unass	Alphaproteobacteria	Alphaproteobacteria	Bacteria	none	Proteobacteria	Alphaproteobacteria	none	none	none	Alphaproteobacteria_bacterium_MarineAlpha5_Bin12	GCA_002937855	Proteobacteria|none|Proteobacteria|Alphaproteobacteria|none|none|none|Alphaproteobacteria_bacterium_MarineAlpha5_Bin12|GCA_002937855	Alphaproteobacteria|none|Proteobacteria|Alphaproteobacteria|none|none|none|Alphaproteobacteria_bacterium_MarineAlpha5_Bin12|GCA_002937855
GCA_002937915.1	Proteobacteria	Alphaproteobacteria_unass	Alphaproteobacteria	Alphaproteobacteria	Bacteria	none	Proteobacteria	Alphaproteobacteria	none	none	none	Alphaproteobacteria_bacterium_MarineAlpha5_Bin8	GCA_002937915	Proteobacteria|none|Proteobacteria|Alphaproteobacteria|none|none|none|Alphaproteobacteria_bacterium_MarineAlpha5_Bin8|GCA_002937915	Alphaproteobacteria|none|Proteobacteria|Alphaproteobacteria|none|none|none|Alphaproteobacteria_bacterium_MarineAlpha5_Bin8|GCA_002937915
GCA_002938155.1	Proteobacteria	Alphaproteobacteria_unass	Alphaproteobacteria	Alphaproteobacteria	Bacteria	none	Proteobacteria	Alphaproteobacteria	none	none	none	Alphaproteobacteria_bacterium_MarineAlpha6_Bin5	GCA_002938155	Proteobacteria|none|Proteobacteria|Alphaproteobacteria|none|none|none|Alphaproteobacteria_bacterium_MarineAlpha6_Bin5|GCA_002938155	Alphaproteobacteria|none|Proteobacteria|Alphaproteobacteria|none|none|none|Alphaproteobacteria_bacterium_MarineAlpha6_Bin5|GCA_002938155
GCA_002938255.1	Proteobacteria	Alphaproteobacteria_unass	Alphaproteobacteria	Alphaproteobacteria	Bacteria	none	Proteobacteria	Alphaproteobacteria	none	none	none	Alphaproteobacteria_bacterium_MarineAlpha5_Bin3	GCA_002938255	Proteobacteria|none|Proteobacteria|Alphaproteobacteria|none|none|none|Alphaproteobacteria_bacterium_MarineAlpha5_Bin3|GCA_002938255	Alphaproteobacteria|none|Proteobacteria|Alphaproteobacteria|none|none|none|Alphaproteobacteria_bacterium_MarineAlpha5_Bin3|GCA_002938255
GCA_002938315.1	Proteobacteria	Alphaproteobacteria_unass	Alphaproteobacteria	Alphaproteobacteria	Bacteria	none	Proteobacteria	Alphaproteobacteria	none	none	none	Alphaproteobacteria_bacterium_MarineAlpha3_Bin2	GCA_002938315	Proteobacteria|none|Proteobacteria|Alphaproteobacteria|none|none|none|Alphaproteobacteria_bacterium_MarineAlpha3_Bin2|GCA_002938315	Alphaproteobacteria|none|Proteobacteria|Alphaproteobacteria|none|none|none|Alphaproteobacteria_bacterium_MarineAlpha3_Bin2|GCA_002938315
GCA_000012345.1	Proteobacteria	Pelagibacterales	Alphaproteobacteria	Alphaproteobacteria	Bacteria	none	Proteobacteria	Alphaproteobacteria	Pelagibacterales	Pelagibacteraceae	Candidatus_Pelagibacter	Candidatus_Pelagibacter_ubique	GCA_000012345	Proteobacteria|none|Proteobacteria|Alphaproteobacteria|Pelagibacterales|Pelagibacteraceae|Candidatus_Pelagibacter|Candidatus_Pelagibacter_ubique|GCA_000012345	Alphaproteobacteria|none|Proteobacteria|Alphaproteobacteria|Pelagibacterales|Pelagibacteraceae|Candidatus_Pelagibacter|Candidatus_Pelagibacter_ubique|GCA_000012345
GCA_000014825.1	Proteobacteria	Rhizobiales	Alphaproteobacteria	Alphaproteobacteria	Bacteria	none	Proteobacteria	Alphaproteobacteria	Rhizobiales	Bradyrhizobiaceae	Rhodopseudomonas	Rhodopseudomonas_palustris	GCA_000014825	Proteobacteria|none|Proteobacteria|Alphaproteobacteria|Rhizobiales|Bradyrhizobiaceae|Rhodopseudomonas|Rhodopseudomonas_palustris|GCA_000014825	Alphaproteobacteria|none|Proteobacteria|Alphaproteobacteria|Rhizobiales|Bradyrhizobiaceae|Rhodopseudomonas|Rhodopseudomonas_palustris|GCA_000014825
GCA_000143145.1	Proteobacteria	Rhizobiales	Alphaproteobacteria	Alphaproteobacteria	Bacteria	none	Proteobacteria	Alphaproteobacteria	Rhizobiales	Hyphomicrobiaceae	Hyphomicrobium	Hyphomicrobium_denitrificans	GCA_000143145	Proteobacteria|none|Proteobacteria|Alphaproteobacteria|Rhizobiales|Hyphomicrobiaceae|Hyphomicrobium|Hyphomicrobium_denitrificans|GCA_000143145	Alphaproteobacteria|none|Proteobacteria|Alphaproteobacteria|Rhizobiales|Hyphomicrobiaceae|Hyphomicrobium|Hyphomicrobium_denitrificans|GCA_000143145
GCA_002844595.1	Proteobacteria	Rhizobiales	Alphaproteobacteria	Alphaproteobacteria	Bacteria	none	Proteobacteria	Alphaproteobacteria	Rhizobiales	Methylocystaceae	Pleomorphomonas	Pleomorphomonas_diazotrophica	GCA_002844595	Proteobacteria|none|Proteobacteria|Alphaproteobacteria|Rhizobiales|Methylocystaceae|Pleomorphomonas|Pleomorphomonas_diazotrophica|GCA_002844595	Alphaproteobacteria|none|Proteobacteria|Alphaproteobacteria|Rhizobiales|Methylocystaceae|Pleomorphomonas|Pleomorphomonas_diazotrophica|GCA_002844595
GCA_000731315.1	Proteobacteria	Rhizobiales	Alphaproteobacteria	Alphaproteobacteria	Bacteria	none	Proteobacteria	Alphaproteobacteria	Rhizobiales	Rhizobiaceae	Neorhizobium	Neorhizobium_galegae	GCA_000731315	Proteobacteria|none|Proteobacteria|Alphaproteobacteria|Rhizobiales|Rhizobiaceae|Neorhizobium|Neorhizobium_galegae|GCA_000731315	Alphaproteobacteria|none|Proteobacteria|Alphaproteobacteria|Rhizobiales|Rhizobiaceae|Neorhizobium|Neorhizobium_galegae|GCA_000731315
GCA_000017565.1	Proteobacteria	Rhizobiales	Alphaproteobacteria	Alphaproteobacteria	Bacteria	none	Proteobacteria	Alphaproteobacteria	Rhizobiales	Rhodobiaceae	Parvibaculum	Parvibaculum_lavamentivorans	GCA_000017565	Proteobacteria|none|Proteobacteria|Alphaproteobacteria|Rhizobiales|Rhodobiaceae|Parvibaculum|Parvibaculum_lavamentivorans|GCA_000017565	Alphaproteobacteria|none|Proteobacteria|Alphaproteobacteria|Rhizobiales|Rhodobiaceae|Parvibaculum|Parvibaculum_lavamentivorans|GCA_000017565
GCA_000017645.1	Proteobacteria	Rhizobiales	Alphaproteobacteria	Alphaproteobacteria	Bacteria	none	Proteobacteria	Alphaproteobacteria	Rhizobiales	Xanthobacteraceae	Xanthobacter	Xanthobacter_autotrophicus	GCA_000017645	Proteobacteria|none|Proteobacteria|Alphaproteobacteria|Rhizobiales|Xanthobacteraceae|Xanthobacter|Xanthobacter_autotrophicus|GCA_000017645	Alphaproteobacteria|none|Proteobacteria|Alphaproteobacteria|Rhizobiales|Xanthobacteraceae|Xanthobacter|Xanthobacter_autotrophicus|GCA_000017645
GCA_002211205.1	Proteobacteria	Rhodobacterales	Alphaproteobacteria	Alphaproteobacteria	Bacteria	none	Proteobacteria	Alphaproteobacteria	Rhodobacterales	Rhodobacteraceae	Alkalimicrobium	Alkalimicrobium_pacificum	GCA_002211205	Proteobacteria|none|Proteobacteria|Alphaproteobacteria|Rhodobacterales|Rhodobacteraceae|Alkalimicrobium|Alkalimicrobium_pacificum|GCA_002211205	Alphaproteobacteria|none|Proteobacteria|Alphaproteobacteria|Rhodobacterales|Rhodobacteraceae|Alkalimicrobium|Alkalimicrobium_pacificum|GCA_002211205
GCA_000152805.1	Proteobacteria	Rhodobacterales	Alphaproteobacteria	Alphaproteobacteria	Bacteria	none	Proteobacteria	Alphaproteobacteria	Rhodobacterales	Rhodobacteraceae	Maritimibacter	Maritimibacter_alkaliphilus	GCA_000152805	Proteobacteria|none|Proteobacteria|Alphaproteobacteria|Rhodobacterales|Rhodobacteraceae|Maritimibacter|Maritimibacter_alkaliphilus|GCA_000152805	Alphaproteobacteria|none|Proteobacteria|Alphaproteobacteria|Rhodobacterales|Rhodobacteraceae|Maritimibacter|Maritimibacter_alkaliphilus|GCA_000152805
GCA_001975705.1	Proteobacteria	Rhodobacterales	Alphaproteobacteria	Alphaproteobacteria	Bacteria	none	Proteobacteria	Alphaproteobacteria	Rhodobacterales	Rhodobacteraceae	Pelagibaca	Pelagibaca_abyssi	GCA_001975705	Proteobacteria|none|Proteobacteria|Alphaproteobacteria|Rhodobacterales|Rhodobacteraceae|Pelagibaca|Pelagibaca_abyssi|GCA_001975705	Alphaproteobacteria|none|Proteobacteria|Alphaproteobacteria|Rhodobacterales|Rhodobacteraceae|Pelagibaca|Pelagibaca_abyssi|GCA_001975705
GCA_000590925.1	Proteobacteria	Rhodobacterales	Alphaproteobacteria	Alphaproteobacteria	Bacteria	none	Proteobacteria	Alphaproteobacteria	Rhodobacterales	Rhodobacteraceae	Roseibacterium	Roseibacterium_elongatum	GCA_000590925	Proteobacteria|none|Proteobacteria|Alphaproteobacteria|Rhodobacterales|Rhodobacteraceae|Roseibacterium|Roseibacterium_elongatum|GCA_000590925	Alphaproteobacteria|none|Proteobacteria|Alphaproteobacteria|Rhodobacterales|Rhodobacteraceae|Roseibacterium|Roseibacterium_elongatum|GCA_000590925
GCA_001870675.1	Proteobacteria	Rhodobacterales	Alphaproteobacteria	Alphaproteobacteria	Bacteria	none	Proteobacteria	Alphaproteobacteria	Rhodobacterales	Rhodobacteraceae	Roseinatronobacter	Roseinatronobacter_thiooxidans	GCA_001870675	Proteobacteria|none|Proteobacteria|Alphaproteobacteria|Rhodobacterales|Rhodobacteraceae|Roseinatronobacter|Roseinatronobacter_thiooxidans|GCA_001870675	Alphaproteobacteria|none|Proteobacteria|Alphaproteobacteria|Rhodobacterales|Rhodobacteraceae|Roseinatronobacter|Roseinatronobacter_thiooxidans|GCA_001870675
GCA_000014045.1	Proteobacteria	Rhodobacterales	Alphaproteobacteria	Alphaproteobacteria	Bacteria	none	Proteobacteria	Alphaproteobacteria	Rhodobacterales	Rhodobacteraceae	Roseobacter	Roseobacter_denitrificans	GCA_000014045	Proteobacteria|none|Proteobacteria|Alphaproteobacteria|Rhodobacterales|Rhodobacteraceae|Roseobacter|Roseobacter_denitrificans|GCA_000014045	Alphaproteobacteria|none|Proteobacteria|Alphaproteobacteria|Rhodobacterales|Rhodobacteraceae|Roseobacter|Roseobacter_denitrificans|GCA_000014045
GCA_000202835.1	Proteobacteria	Rhodospirillales	Alphaproteobacteria	Alphaproteobacteria	Bacteria	none	Proteobacteria	Alphaproteobacteria	Rhodospirillales	Acetobacteraceae	Acidiphilium	Acidiphilium_multivorum	GCA_000202835	Proteobacteria|none|Proteobacteria|Alphaproteobacteria|Rhodospirillales|Acetobacteraceae|Acidiphilium|Acidiphilium_multivorum|GCA_000202835	Alphaproteobacteria|none|Proteobacteria|Alphaproteobacteria|Rhodospirillales|Acetobacteraceae|Acidiphilium|Acidiphilium_multivorum|GCA_000202835
GCA_000617865.1	Proteobacteria	Rhodospirillales	Alphaproteobacteria	Alphaproteobacteria	Bacteria	none	Proteobacteria	Alphaproteobacteria	Rhodospirillales	Acetobacteraceae	Acidomonas	Acidomonas_methanolica	GCA_000617865	Proteobacteria|none|Proteobacteria|Alphaproteobacteria|Rhodospirillales|Acetobacteraceae|Acidomonas|Acidomonas_methanolica|GCA_000617865	Alphaproteobacteria|none|Proteobacteria|Alphaproteobacteria|Rhodospirillales|Acetobacteraceae|Acidomonas|Acidomonas_methanolica|GCA_000617865
GCA_000423185.1	Proteobacteria	Rhodospirillales	Alphaproteobacteria	Alphaproteobacteria	Bacteria	none	Proteobacteria	Alphaproteobacteria	Rhodospirillales	Rhodospirillaceae	Inquilinus	Inquilinus_limosus	GCA_000423185	Proteobacteria|none|Proteobacteria|Alphaproteobacteria|Rhodospirillales|Rhodospirillaceae|Inquilinus|Inquilinus_limosus|GCA_000423185	Alphaproteobacteria|none|Proteobacteria|Alphaproteobacteria|Rhodospirillales|Rhodospirillaceae|Inquilinus|Inquilinus_limosus|GCA_000423185
GCA_900156605.1	Proteobacteria	Rhodospirillales	Alphaproteobacteria	Alphaproteobacteria	Bacteria	none	Proteobacteria	Alphaproteobacteria	Rhodospirillales	Rhodospirillaceae	Insolitispirillum	Insolitispirillum_peregrinum	GCA_900156605	Proteobacteria|none|Proteobacteria|Alphaproteobacteria|Rhodospirillales|Rhodospirillaceae|Insolitispirillum|Insolitispirillum_peregrinum|GCA_900156605	Alphaproteobacteria|none|Proteobacteria|Alphaproteobacteria|Rhodospirillales|Rhodospirillaceae|Insolitispirillum|Insolitispirillum_peregrinum|GCA_900156605
GCA_000426505.1	Proteobacteria	Rhodospirillales	Alphaproteobacteria	Alphaproteobacteria	Bacteria	none	Proteobacteria	Alphaproteobacteria	Rhodospirillales	Rhodospirillaceae	Nisaea	Nisaea_denitrificans	GCA_000426505	Proteobacteria|none|Proteobacteria|Alphaproteobacteria|Rhodospirillales|Rhodospirillaceae|Nisaea|Nisaea_denitrificans|GCA_000426505	Alphaproteobacteria|none|Proteobacteria|Alphaproteobacteria|Rhodospirillales|Rhodospirillaceae|Nisaea|Nisaea_denitrificans|GCA_000426505
GCA_000576635.1	Proteobacteria	Rhodospirillales	Alphaproteobacteria	Alphaproteobacteria	Bacteria	none	Proteobacteria	Alphaproteobacteria	Rhodospirillales	Rhodospirillaceae	Skermanella	Skermanella_stibiiresistens	GCA_000576635	Proteobacteria|none|Proteobacteria|Alphaproteobacteria|Rhodospirillales|Rhodospirillaceae|Skermanella|Skermanella_stibiiresistens|GCA_000576635	Alphaproteobacteria|none|Proteobacteria|Alphaproteobacteria|Rhodospirillales|Rhodospirillaceae|Skermanella|Skermanella_stibiiresistens|GCA_000576635
GCA_002844375.1	Proteobacteria	Rhodospirillales	Alphaproteobacteria	Alphaproteobacteria	Bacteria	none	Proteobacteria	Alphaproteobacteria	Rhodospirillales	Rhodospirillaceae	Thalassospira	Thalassospira_marina	GCA_002844375	Proteobacteria|none|Proteobacteria|Alphaproteobacteria|Rhodospirillales|Rhodospirillaceae|Thalassospira|Thalassospira_marina|GCA_002844375	Alphaproteobacteria|none|Proteobacteria|Alphaproteobacteria|Rhodospirillales|Rhodospirillaceae|Thalassospira|Thalassospira_marina|GCA_002844375
GCA_000632985.1	Proteobacteria	Rickettsiales	Alphaproteobacteria	Alphaproteobacteria	Bacteria	none	Proteobacteria	Alphaproteobacteria	Rickettsiales	Anaplasmataceae	Neorickettsia	Neorickettsia_helminthoeca	GCA_000632985	Proteobacteria|none|Proteobacteria|Alphaproteobacteria|Rickettsiales|Anaplasmataceae|Neorickettsia|Neorickettsia_helminthoeca|GCA_000632985	Alphaproteobacteria|none|Proteobacteria|Alphaproteobacteria|Rickettsiales|Anaplasmataceae|Neorickettsia|Neorickettsia_helminthoeca|GCA_000632985
GCA_000283595.1	Proteobacteria	Rickettsiales	Alphaproteobacteria	Alphaproteobacteria	Bacteria	none	Proteobacteria	Alphaproteobacteria	Rickettsiales	Rickettsiaceae	Rickettsia	Rickettsia_japonica	GCA_000283595	Proteobacteria|none|Proteobacteria|Alphaproteobacteria|Rickettsiales|Rickettsiaceae|Rickettsia|Rickettsia_japonica|GCA_000283595	Alphaproteobacteria|none|Proteobacteria|Alphaproteobacteria|Rickettsiales|Rickettsiaceae|Rickettsia|Rickettsia_japonica|GCA_000283595
GCA_001008165.2	Proteobacteria	Sphingomonadales	Alphaproteobacteria	Alphaproteobacteria	Bacteria	none	Proteobacteria	Alphaproteobacteria	Sphingomonadales	Erythrobacteraceae	Altererythrobacter	Altererythrobacter_atlanticus	GCA_001008165	Proteobacteria|none|Proteobacteria|Alphaproteobacteria|Sphingomonadales|Erythrobacteraceae|Altererythrobacter|Altererythrobacter_atlanticus|GCA_001008165	Alphaproteobacteria|none|Proteobacteria|Alphaproteobacteria|Sphingomonadales|Erythrobacteraceae|Altererythrobacter|Altererythrobacter_atlanticus|GCA_001008165
GCA_000175255.2	Proteobacteria	Sphingomonadales	Alphaproteobacteria	Alphaproteobacteria	Bacteria	none	Proteobacteria	Alphaproteobacteria	Sphingomonadales	Sphingomonadaceae	Zymomonas	Zymomonas_mobilis	GCA_000175255	Proteobacteria|none|Proteobacteria|Alphaproteobacteria|Sphingomonadales|Sphingomonadaceae|Zymomonas|Zymomonas_mobilis|GCA_000175255	Alphaproteobacteria|none|Proteobacteria|Alphaproteobacteria|Sphingomonadales|Sphingomonadaceae|Zymomonas|Zymomonas_mobilis|GCA_000175255
GCA_001931675.1	Proteobacteria	Burkholderiales	Betaproteobacteria	Betaproteobacteria	Bacteria	none	Proteobacteria	Betaproteobacteria	Burkholderiales	Burkholderiaceae	Pandoraea	Pandoraea_thiooxydans	GCA_001931675	Proteobacteria|none|Proteobacteria|Betaproteobacteria|Burkholderiales|Burkholderiaceae|Pandoraea|Pandoraea_thiooxydans|GCA_001931675	Betaproteobacteria|none|Proteobacteria|Betaproteobacteria|Burkholderiales|Burkholderiaceae|Pandoraea|Pandoraea_thiooxydans|GCA_001931675
GCA_001418295.1	Proteobacteria	Burkholderiales	Betaproteobacteria	Betaproteobacteria	Bacteria	none	Proteobacteria	Betaproteobacteria	Burkholderiales	Comamonadaceae	Comamonas	Comamonas_thiooxydans	GCA_001418295	Proteobacteria|none|Proteobacteria|Betaproteobacteria|Burkholderiales|Comamonadaceae|Comamonas|Comamonas_thiooxydans|GCA_001418295	Betaproteobacteria|none|Proteobacteria|Betaproteobacteria|Burkholderiales|Comamonadaceae|Comamonas|Comamonas_thiooxydans|GCA_001418295
GCA_003100395.1	Proteobacteria	Burkholderiales	Betaproteobacteria	Betaproteobacteria	Bacteria	none	Proteobacteria	Betaproteobacteria	Burkholderiales	none	Aquabacterium	Aquabacterium_olei	GCA_003100395	Proteobacteria|none|Proteobacteria|Betaproteobacteria|Burkholderiales|none|Aquabacterium|Aquabacterium_olei|GCA_003100395	Betaproteobacteria|none|Proteobacteria|Betaproteobacteria|Burkholderiales|none|Aquabacterium|Aquabacterium_olei|GCA_003100395
GCA_001293525.1	Proteobacteria	Burkholderiales	Betaproteobacteria	Betaproteobacteria	Bacteria	none	Proteobacteria	Betaproteobacteria	Burkholderiales	none	Ideonella	Ideonella_sakaiensis	GCA_001293525	Proteobacteria|none|Proteobacteria|Betaproteobacteria|Burkholderiales|none|Ideonella|Ideonella_sakaiensis|GCA_001293525	Betaproteobacteria|none|Proteobacteria|Betaproteobacteria|Burkholderiales|none|Ideonella|Ideonella_sakaiensis|GCA_001293525
GCA_001515305.1	Proteobacteria	Neisseriales	Betaproteobacteria	Betaproteobacteria	Bacteria	none	Proteobacteria	Betaproteobacteria	Neisseriales	Chromobacteriaceae	Aquitalea	Aquitalea_pelogenes	GCA_001515305	Proteobacteria|none|Proteobacteria|Betaproteobacteria|Neisseriales|Chromobacteriaceae|Aquitalea|Aquitalea_pelogenes|GCA_001515305	Betaproteobacteria|none|Proteobacteria|Betaproteobacteria|Neisseriales|Chromobacteriaceae|Aquitalea|Aquitalea_pelogenes|GCA_001515305
GCA_000430805.1	Proteobacteria	Neisseriales	Betaproteobacteria	Betaproteobacteria	Bacteria	none	Proteobacteria	Betaproteobacteria	Neisseriales	Chromobacteriaceae	Chitinilyticum	Chitinilyticum_aquatile	GCA_000430805	Proteobacteria|none|Proteobacteria|Betaproteobacteria|Neisseriales|Chromobacteriaceae|Chitinilyticum|Chitinilyticum_aquatile|GCA_000430805	Betaproteobacteria|none|Proteobacteria|Betaproteobacteria|Neisseriales|Chromobacteriaceae|Chitinilyticum|Chitinilyticum_aquatile|GCA_000430805
GCA_002951835.1	Proteobacteria	Neisseriales	Betaproteobacteria	Betaproteobacteria	Bacteria	none	Proteobacteria	Betaproteobacteria	Neisseriales	Neisseriaceae	Simonsiella	Simonsiella_muelleri	GCA_002951835	Proteobacteria|none|Proteobacteria|Betaproteobacteria|Neisseriales|Neisseriaceae|Simonsiella|Simonsiella_muelleri|GCA_002951835	Betaproteobacteria|none|Proteobacteria|Betaproteobacteria|Neisseriales|Neisseriaceae|Simonsiella|Simonsiella_muelleri|GCA_002951835
GCA_000236665.1	Proteobacteria	Rhodocyclales	Betaproteobacteria	Betaproteobacteria	Bacteria	none	Proteobacteria	Betaproteobacteria	Rhodocyclales	Rhodocyclaceae	Azospira	Azospira_oryzae	GCA_000236665	Proteobacteria|none|Proteobacteria|Betaproteobacteria|Rhodocyclales|Rhodocyclaceae|Azospira|Azospira_oryzae|GCA_000236665	Betaproteobacteria|none|Proteobacteria|Betaproteobacteria|Rhodocyclales|Rhodocyclaceae|Azospira|Azospira_oryzae|GCA_000236665
GCA_000021905.1	Proteobacteria	Desulfobacterales	Deltaproteobacteria	Deltaproteobacteria	Bacteria	none	Proteobacteria	Deltaproteobacteria	Desulfobacterales	Desulfobacteraceae	Desulfatibacillum	Desulfatibacillum_alkenivorans	GCA_000021905	Proteobacteria|none|Proteobacteria|Deltaproteobacteria|Desulfobacterales|Desulfobacteraceae|Desulfatibacillum|Desulfatibacillum_alkenivorans|GCA_000021905	Deltaproteobacteria|none|Proteobacteria|Deltaproteobacteria|Desulfobacterales|Desulfobacteraceae|Desulfatibacillum|Desulfatibacillum_alkenivorans|GCA_000021905
GCA_000429925.1	Proteobacteria	Desulfobacterales	Deltaproteobacteria	Deltaproteobacteria	Bacteria	none	Proteobacteria	Deltaproteobacteria	Desulfobacterales	Desulfobacteraceae	Desulfatirhabdium	Desulfatirhabdium_butyrativorans	GCA_000429925	Proteobacteria|none|Proteobacteria|Deltaproteobacteria|Desulfobacterales|Desulfobacteraceae|Desulfatirhabdium|Desulfatirhabdium_butyrativorans|GCA_000429925	Deltaproteobacteria|none|Proteobacteria|Deltaproteobacteria|Desulfobacterales|Desulfobacteraceae|Desulfatirhabdium|Desulfatirhabdium_butyrativorans|GCA_000429925
GCA_000020365.1	Proteobacteria	Desulfobacterales	Deltaproteobacteria	Deltaproteobacteria	Bacteria	none	Proteobacteria	Deltaproteobacteria	Desulfobacterales	Desulfobacteraceae	Desulfobacterium	Desulfobacterium_autotrophicum	GCA_000020365	Proteobacteria|none|Proteobacteria|Deltaproteobacteria|Desulfobacterales|Desulfobacteraceae|Desulfobacterium|Desulfobacterium_autotrophicum|GCA_000020365	Deltaproteobacteria|none|Proteobacteria|Deltaproteobacteria|Desulfobacterales|Desulfobacteraceae|Desulfobacterium|Desulfobacterium_autotrophicum|GCA_000020365
GCA_000472805.1	Proteobacteria	Desulfobacterales	Deltaproteobacteria	Deltaproteobacteria	Bacteria	none	Proteobacteria	Deltaproteobacteria	Desulfobacterales	Desulfobacteraceae	Desulfosarcina	Desulfosarcina_sp__BuS5	GCA_000472805	Proteobacteria|none|Proteobacteria|Deltaproteobacteria|Desulfobacterales|Desulfobacteraceae|Desulfosarcina|Desulfosarcina_sp__BuS5|GCA_000472805	Deltaproteobacteria|none|Proteobacteria|Deltaproteobacteria|Desulfobacterales|Desulfobacteraceae|Desulfosarcina|Desulfosarcina_sp__BuS5|GCA_000472805
GCA_000421285.1	Proteobacteria	Desulfobacterales	Deltaproteobacteria	Deltaproteobacteria	Bacteria	none	Proteobacteria	Deltaproteobacteria	Desulfobacterales	Desulfobacteraceae	Desulfotignum	Desulfotignum_balticum	GCA_000421285	Proteobacteria|none|Proteobacteria|Deltaproteobacteria|Desulfobacterales|Desulfobacteraceae|Desulfotignum|Desulfotignum_balticum|GCA_000421285	Deltaproteobacteria|none|Proteobacteria|Deltaproteobacteria|Desulfobacterales|Desulfobacteraceae|Desulfotignum|Desulfotignum_balticum|GCA_000421285
GCA_000092205.1	Proteobacteria	Desulfobacterales	Deltaproteobacteria	Deltaproteobacteria	Bacteria	none	Proteobacteria	Deltaproteobacteria	Desulfobacterales	Desulfobulbaceae	Desulfurivibrio	Desulfurivibrio_alkaliphilus	GCA_000092205	Proteobacteria|none|Proteobacteria|Deltaproteobacteria|Desulfobacterales|Desulfobulbaceae|Desulfurivibrio|Desulfurivibrio_alkaliphilus|GCA_000092205	Deltaproteobacteria|none|Proteobacteria|Deltaproteobacteria|Desulfobacterales|Desulfobulbaceae|Desulfurivibrio|Desulfurivibrio_alkaliphilus|GCA_000092205
GCA_000686525.1	Proteobacteria	Desulfovibrionales	Deltaproteobacteria	Deltaproteobacteria	Bacteria	none	Proteobacteria	Deltaproteobacteria	Desulfovibrionales	Desulfohalobiaceae	Desulfonatronovibrio	Desulfonatronovibrio_hydrogenovorans	GCA_000686525	Proteobacteria|none|Proteobacteria|Deltaproteobacteria|Desulfovibrionales|Desulfohalobiaceae|Desulfonatronovibrio|Desulfonatronovibrio_hydrogenovorans|GCA_000686525	Deltaproteobacteria|none|Proteobacteria|Deltaproteobacteria|Desulfovibrionales|Desulfohalobiaceae|Desulfonatronovibrio|Desulfonatronovibrio_hydrogenovorans|GCA_000686525
GCA_000934745.1	Proteobacteria	Desulfovibrionales	Deltaproteobacteria	Deltaproteobacteria	Bacteria	none	Proteobacteria	Deltaproteobacteria	Desulfovibrionales	Desulfonatronaceae	Desulfonatronum	Desulfonatronum_thioautotrophicum	GCA_000934745	Proteobacteria|none|Proteobacteria|Deltaproteobacteria|Desulfovibrionales|Desulfonatronaceae|Desulfonatronum|Desulfonatronum_thioautotrophicum|GCA_000934745	Deltaproteobacteria|none|Proteobacteria|Deltaproteobacteria|Desulfovibrionales|Desulfonatronaceae|Desulfonatronum|Desulfonatronum_thioautotrophicum|GCA_000934745
GCA_900107645.1	Proteobacteria	Desulfuromonadales	Deltaproteobacteria	Deltaproteobacteria	Bacteria	none	Proteobacteria	Deltaproteobacteria	Desulfuromonadales	Desulfuromonadaceae	Desulfuromusa	Desulfuromusa_kysingii	GCA_900107645	Proteobacteria|none|Proteobacteria|Deltaproteobacteria|Desulfuromonadales|Desulfuromonadaceae|Desulfuromusa|Desulfuromusa_kysingii|GCA_900107645	Deltaproteobacteria|none|Proteobacteria|Deltaproteobacteria|Desulfuromonadales|Desulfuromonadaceae|Desulfuromusa|Desulfuromusa_kysingii|GCA_900107645
GCA_000827125.1	Proteobacteria	Desulfuromonadales	Deltaproteobacteria	Deltaproteobacteria	Bacteria	none	Proteobacteria	Deltaproteobacteria	Desulfuromonadales	Geobacteraceae	Geoalkalibacter	Geoalkalibacter_subterraneus	GCA_000827125	Proteobacteria|none|Proteobacteria|Deltaproteobacteria|Desulfuromonadales|Geobacteraceae|Geoalkalibacter|Geoalkalibacter_subterraneus|GCA_000827125	Deltaproteobacteria|none|Proteobacteria|Deltaproteobacteria|Desulfuromonadales|Geobacteraceae|Geoalkalibacter|Geoalkalibacter_subterraneus|GCA_000827125
GCA_000022145.1	Proteobacteria	Myxococcales	Deltaproteobacteria	Deltaproteobacteria	Bacteria	none	Proteobacteria	Deltaproteobacteria	Myxococcales	Anaeromyxobacteraceae	Anaeromyxobacter	Anaeromyxobacter_dehalogenans	GCA_000022145	Proteobacteria|none|Proteobacteria|Deltaproteobacteria|Myxococcales|Anaeromyxobacteraceae|Anaeromyxobacter|Anaeromyxobacter_dehalogenans|GCA_000022145	Deltaproteobacteria|none|Proteobacteria|Deltaproteobacteria|Myxococcales|Anaeromyxobacteraceae|Anaeromyxobacter|Anaeromyxobacter_dehalogenans|GCA_000022145
GCA_000024805.1	Proteobacteria	Myxococcales	Deltaproteobacteria	Deltaproteobacteria	Bacteria	none	Proteobacteria	Deltaproteobacteria	Myxococcales	Kofleriaceae	Haliangium	Haliangium_ochraceum	GCA_000024805	Proteobacteria|none|Proteobacteria|Deltaproteobacteria|Myxococcales|Kofleriaceae|Haliangium|Haliangium_ochraceum|GCA_000024805	Deltaproteobacteria|none|Proteobacteria|Deltaproteobacteria|Myxococcales|Kofleriaceae|Haliangium|Haliangium_ochraceum|GCA_000024805
GCA_000012685.1	Proteobacteria	Myxococcales	Deltaproteobacteria	Deltaproteobacteria	Bacteria	none	Proteobacteria	Deltaproteobacteria	Myxococcales	Myxococcaceae	Myxococcus	Myxococcus_xanthus	GCA_000012685	Proteobacteria|none|Proteobacteria|Deltaproteobacteria|Myxococcales|Myxococcaceae|Myxococcus|Myxococcus_xanthus|GCA_000012685	Deltaproteobacteria|none|Proteobacteria|Deltaproteobacteria|Myxococcales|Myxococcaceae|Myxococcus|Myxococcus_xanthus|GCA_000012685
GCA_001577525.1	Proteobacteria	Deltaproteobacteria	Deltaproteobacteria	Deltaproteobacteria	Bacteria	none	Proteobacteria	Deltaproteobacteria	none	Candidatus_Desulfofervidaceae	Candidatus_Desulfofervidus	Candidatus_Desulfofervidus_auxilii	GCA_001577525	Proteobacteria|none|Proteobacteria|Deltaproteobacteria|none|Candidatus_Desulfofervidaceae|Candidatus_Desulfofervidus|Candidatus_Desulfofervidus_auxilii|GCA_001577525	Deltaproteobacteria|none|Proteobacteria|Deltaproteobacteria|none|Candidatus_Desulfofervidaceae|Candidatus_Desulfofervidus|Candidatus_Desulfofervidus_auxilii|GCA_001577525
GCA_000195295.1	Proteobacteria	Syntrophobacterales	Deltaproteobacteria	Deltaproteobacteria	Bacteria	none	Proteobacteria	Deltaproteobacteria	Syntrophobacterales	Syntrophaceae	Desulfobacca	Desulfobacca_acetoxidans	GCA_000195295	Proteobacteria|none|Proteobacteria|Deltaproteobacteria|Syntrophobacterales|Syntrophaceae|Desulfobacca|Desulfobacca_acetoxidans|GCA_000195295	Deltaproteobacteria|none|Proteobacteria|Deltaproteobacteria|Syntrophobacterales|Syntrophaceae|Desulfobacca|Desulfobacca_acetoxidans|GCA_000195295
GCA_000013405.1	Proteobacteria	Syntrophobacterales	Deltaproteobacteria	Deltaproteobacteria	Bacteria	none	Proteobacteria	Deltaproteobacteria	Syntrophobacterales	Syntrophaceae	Syntrophus	Syntrophus_aciditrophicus	GCA_000013405	Proteobacteria|none|Proteobacteria|Deltaproteobacteria|Syntrophobacterales|Syntrophaceae|Syntrophus|Syntrophus_aciditrophicus|GCA_000013405	Deltaproteobacteria|none|Proteobacteria|Deltaproteobacteria|Syntrophobacterales|Syntrophaceae|Syntrophus|Syntrophus_aciditrophicus|GCA_000013405
GCA_900176285.1	Proteobacteria	Syntrophobacterales	Deltaproteobacteria	Deltaproteobacteria	Bacteria	none	Proteobacteria	Deltaproteobacteria	Syntrophobacterales	Syntrophobacteraceae	Desulfacinum	Desulfacinum_hydrothermale	GCA_900176285	Proteobacteria|none|Proteobacteria|Deltaproteobacteria|Syntrophobacterales|Syntrophobacteraceae|Desulfacinum|Desulfacinum_hydrothermale|GCA_900176285	Deltaproteobacteria|none|Proteobacteria|Deltaproteobacteria|Syntrophobacterales|Syntrophobacteraceae|Desulfacinum|Desulfacinum_hydrothermale|GCA_900176285
GCA_000512235.1	Proteobacteria	Syntrophobacterales	Deltaproteobacteria	Deltaproteobacteria	Bacteria	none	Proteobacteria	Deltaproteobacteria	Syntrophobacterales	Syntrophorhabdaceae	Syntrophorhabdus	Syntrophorhabdus_aromaticivorans	GCA_000512235	Proteobacteria|none|Proteobacteria|Deltaproteobacteria|Syntrophobacterales|Syntrophorhabdaceae|Syntrophorhabdus|Syntrophorhabdus_aromaticivorans|GCA_000512235	Deltaproteobacteria|none|Proteobacteria|Deltaproteobacteria|Syntrophobacterales|Syntrophorhabdaceae|Syntrophorhabdus|Syntrophorhabdus_aromaticivorans|GCA_000512235
GCA_000012965.1	Proteobacteria	Campylobacterales	Epsilonproteobacteria	Epsilonproteobacteria	Bacteria	none	Proteobacteria	Epsilonproteobacteria	Campylobacterales	Helicobacteraceae	Sulfurimonas	Sulfurimonas_denitrificans	GCA_000012965	Proteobacteria|none|Proteobacteria|Epsilonproteobacteria|Campylobacterales|Helicobacteraceae|Sulfurimonas|Sulfurimonas_denitrificans|GCA_000012965	Epsilonproteobacteria|none|Proteobacteria|Epsilonproteobacteria|Campylobacterales|Helicobacteraceae|Sulfurimonas|Sulfurimonas_denitrificans|GCA_000012965
GCA_000196135.1	Proteobacteria	Campylobacterales	Epsilonproteobacteria	Epsilonproteobacteria	Bacteria	none	Proteobacteria	Epsilonproteobacteria	Campylobacterales	Helicobacteraceae	Wolinella	Wolinella_succinogenes	GCA_000196135	Proteobacteria|none|Proteobacteria|Epsilonproteobacteria|Campylobacterales|Helicobacteraceae|Wolinella|Wolinella_succinogenes|GCA_000196135	Epsilonproteobacteria|none|Proteobacteria|Epsilonproteobacteria|Campylobacterales|Helicobacteraceae|Wolinella|Wolinella_succinogenes|GCA_000196135
GCA_000170735.1	Proteobacteria	Nautiliales	Epsilonproteobacteria	Epsilonproteobacteria	Bacteria	none	Proteobacteria	Epsilonproteobacteria	Nautiliales	Nautiliaceae	Caminibacter	Caminibacter_mediatlanticus	GCA_000170735	Proteobacteria|none|Proteobacteria|Epsilonproteobacteria|Nautiliales|Nautiliaceae|Caminibacter|Caminibacter_mediatlanticus|GCA_000170735	Epsilonproteobacteria|none|Proteobacteria|Epsilonproteobacteria|Nautiliales|Nautiliaceae|Caminibacter|Caminibacter_mediatlanticus|GCA_000170735
GCA_000987835.1	Proteobacteria	Epsilonproteobacteria	Epsilonproteobacteria	Epsilonproteobacteria	Bacteria	none	Proteobacteria	Epsilonproteobacteria	none	none	Sulfurovum	Sulfurovum_lithotrophicum	GCA_000987835	Proteobacteria|none|Proteobacteria|Epsilonproteobacteria|none|none|Sulfurovum|Sulfurovum_lithotrophicum|GCA_000987835	Epsilonproteobacteria|none|Proteobacteria|Epsilonproteobacteria|none|none|Sulfurovum|Sulfurovum_lithotrophicum|GCA_000987835
GCA_900167015.1	Proteobacteria	Aeromonadales	Gammaproteobacteria	Gammaproteobacteria	Bacteria	none	Proteobacteria	Gammaproteobacteria	Aeromonadales	Succinivibrionaceae	Succinivibrio	Succinivibrio_dextrinosolvens	GCA_900167015	Proteobacteria|none|Proteobacteria|Gammaproteobacteria|Aeromonadales|Succinivibrionaceae|Succinivibrio|Succinivibrio_dextrinosolvens|GCA_900167015	Gammaproteobacteria|none|Proteobacteria|Gammaproteobacteria|Aeromonadales|Succinivibrionaceae|Succinivibrio|Succinivibrio_dextrinosolvens|GCA_900167015
GCA_000172635.2	Proteobacteria	Alteromonadales	Gammaproteobacteria	Gammaproteobacteria	Bacteria	none	Proteobacteria	Gammaproteobacteria	Alteromonadales	Alteromonadaceae	Alteromonas	Alteromonas_macleodii	GCA_000172635	Proteobacteria|none|Proteobacteria|Gammaproteobacteria|Alteromonadales|Alteromonadaceae|Alteromonas|Alteromonas_macleodii|GCA_000172635	Gammaproteobacteria|none|Proteobacteria|Gammaproteobacteria|Alteromonadales|Alteromonadaceae|Alteromonas|Alteromonas_macleodii|GCA_000172635
GCA_000170835.1	Proteobacteria	Alteromonadales	Gammaproteobacteria	Gammaproteobacteria	Bacteria	none	Proteobacteria	Gammaproteobacteria	Alteromonadales	Alteromonadaceae	Marinobacter	Marinobacter_algicola	GCA_000170835	Proteobacteria|none|Proteobacteria|Gammaproteobacteria|Alteromonadales|Alteromonadaceae|Marinobacter|Marinobacter_algicola|GCA_000170835	Gammaproteobacteria|none|Proteobacteria|Gammaproteobacteria|Alteromonadales|Alteromonadaceae|Marinobacter|Marinobacter_algicola|GCA_000170835
GCA_001292705.1	Proteobacteria	Cellvibrionales	Gammaproteobacteria	Gammaproteobacteria	Bacteria	none	Proteobacteria	Gammaproteobacteria	Cellvibrionales	Cellvibrionaceae	Marinagarivorans	Marinagarivorans_algicola	GCA_001292705	Proteobacteria|none|Proteobacteria|Gammaproteobacteria|Cellvibrionales|Cellvibrionaceae|Marinagarivorans|Marinagarivorans_algicola|GCA_001292705	Gammaproteobacteria|none|Proteobacteria|Gammaproteobacteria|Cellvibrionales|Cellvibrionaceae|Marinagarivorans|Marinagarivorans_algicola|GCA_001292705
GCA_000025485.1	Proteobacteria	Chromatiales	Gammaproteobacteria	Gammaproteobacteria	Bacteria	none	Proteobacteria	Gammaproteobacteria	Chromatiales	Chromatiaceae	Allochromatium	Allochromatium_vinosum	GCA_000025485	Proteobacteria|none|Proteobacteria|Gammaproteobacteria|Chromatiales|Chromatiaceae|Allochromatium|Allochromatium_vinosum|GCA_000025485	Gammaproteobacteria|none|Proteobacteria|Gammaproteobacteria|Chromatiales|Chromatiaceae|Allochromatium|Allochromatium_vinosum|GCA_000025485
GCA_000425345.1	Proteobacteria	Chromatiales	Gammaproteobacteria	Gammaproteobacteria	Bacteria	none	Proteobacteria	Gammaproteobacteria	Chromatiales	Chromatiaceae	Rheinheimera	Rheinheimera_baltica	GCA_000425345	Proteobacteria|none|Proteobacteria|Gammaproteobacteria|Chromatiales|Chromatiaceae|Rheinheimera|Rheinheimera_baltica|GCA_000425345	Gammaproteobacteria|none|Proteobacteria|Gammaproteobacteria|Chromatiales|Chromatiaceae|Rheinheimera|Rheinheimera_baltica|GCA_000425345
GCA_000321415.2	Proteobacteria	Chromatiales	Gammaproteobacteria	Gammaproteobacteria	Bacteria	none	Proteobacteria	Gammaproteobacteria	Chromatiales	Ectothiorhodospiraceae	Thioalkalivibrio	Thioalkalivibrio_nitratireducens	GCA_000321415	Proteobacteria|none|Proteobacteria|Gammaproteobacteria|Chromatiales|Ectothiorhodospiraceae|Thioalkalivibrio|Thioalkalivibrio_nitratireducens|GCA_000321415	Gammaproteobacteria|none|Proteobacteria|Gammaproteobacteria|Chromatiales|Ectothiorhodospiraceae|Thioalkalivibrio|Thioalkalivibrio_nitratireducens|GCA_000321415
GCA_001677435.1	Proteobacteria	Chromatiales	Gammaproteobacteria	Gammaproteobacteria	Bacteria	none	Proteobacteria	Gammaproteobacteria	Chromatiales	Woeseiaceae	Woeseia	Woeseia_oceani	GCA_001677435	Proteobacteria|none|Proteobacteria|Gammaproteobacteria|Chromatiales|Woeseiaceae|Woeseia|Woeseia_oceani|GCA_001677435	Gammaproteobacteria|none|Proteobacteria|Gammaproteobacteria|Chromatiales|Woeseiaceae|Woeseia|Woeseia_oceani|GCA_001677435
GCA_000005845.2	Proteobacteria	Enterobacterales	Gammaproteobacteria	Gammaproteobacteria	Bacteria	none	Proteobacteria	Gammaproteobacteria	Enterobacterales	Enterobacteriaceae	Escherichia	Escherichia_coli	GCA_000005845	Proteobacteria|none|Proteobacteria|Gammaproteobacteria|Enterobacterales|Enterobacteriaceae|Escherichia|Escherichia_coli|GCA_000005845	Gammaproteobacteria|none|Proteobacteria|Gammaproteobacteria|Enterobacterales|Enterobacteriaceae|Escherichia|Escherichia_coli|GCA_000005845
GCA_000091565.1	Proteobacteria	Enterobacterales	Gammaproteobacteria	Gammaproteobacteria	Bacteria	none	Proteobacteria	Gammaproteobacteria	Enterobacterales	Erwiniaceae	Erwinia	Erwinia_amylovora	GCA_000091565	Proteobacteria|none|Proteobacteria|Gammaproteobacteria|Enterobacterales|Erwiniaceae|Erwinia|Erwinia_amylovora|GCA_000091565	Gammaproteobacteria|none|Proteobacteria|Gammaproteobacteria|Enterobacterales|Erwiniaceae|Erwinia|Erwinia_amylovora|GCA_000091565
GCA_000286435.2	Proteobacteria	Enterobacterales	Gammaproteobacteria	Gammaproteobacteria	Bacteria	none	Proteobacteria	Gammaproteobacteria	Enterobacterales	Morganellaceae	Morganella	Morganella_morganii	GCA_000286435	Proteobacteria|none|Proteobacteria|Gammaproteobacteria|Enterobacterales|Morganellaceae|Morganella|Morganella_morganii|GCA_000286435	Gammaproteobacteria|none|Proteobacteria|Gammaproteobacteria|Enterobacterales|Morganellaceae|Morganella|Morganella_morganii|GCA_000286435
GCA_001467045.1	Proteobacteria	Legionellales	Gammaproteobacteria	Gammaproteobacteria	Bacteria	none	Proteobacteria	Gammaproteobacteria	Legionellales	Legionellaceae	Fluoribacter	Fluoribacter_bozemanae	GCA_001467045	Proteobacteria|none|Proteobacteria|Gammaproteobacteria|Legionellales|Legionellaceae|Fluoribacter|Fluoribacter_bozemanae|GCA_001467045	Gammaproteobacteria|none|Proteobacteria|Gammaproteobacteria|Legionellales|Legionellaceae|Fluoribacter|Fluoribacter_bozemanae|GCA_001467045
GCA_000009365.1	Proteobacteria	Oceanospirillales	Gammaproteobacteria	Gammaproteobacteria	Bacteria	none	Proteobacteria	Gammaproteobacteria	Oceanospirillales	Alcanivoracaceae	Alcanivorax	Alcanivorax_borkumensis	GCA_000009365	Proteobacteria|none|Proteobacteria|Gammaproteobacteria|Oceanospirillales|Alcanivoracaceae|Alcanivorax|Alcanivorax_borkumensis|GCA_000009365	Gammaproteobacteria|none|Proteobacteria|Gammaproteobacteria|Oceanospirillales|Alcanivoracaceae|Alcanivorax|Alcanivorax_borkumensis|GCA_000009365
GCA_001528745.1	Proteobacteria	Oceanospirillales	Gammaproteobacteria	Gammaproteobacteria	Bacteria	none	Proteobacteria	Gammaproteobacteria	Oceanospirillales	Oceanospirillaceae	Marinobacterium	Marinobacterium_profundum	GCA_001528745	Proteobacteria|none|Proteobacteria|Gammaproteobacteria|Oceanospirillales|Oceanospirillaceae|Marinobacterium|Marinobacterium_profundum|GCA_001528745	Gammaproteobacteria|none|Proteobacteria|Gammaproteobacteria|Oceanospirillales|Oceanospirillaceae|Marinobacterium|Marinobacterium_profundum|GCA_001528745
GCA_000021885.1	Proteobacteria	Pasteurellales	Gammaproteobacteria	Gammaproteobacteria	Bacteria	none	Proteobacteria	Gammaproteobacteria	Pasteurellales	Pasteurellaceae	Glaesserella	Glaesserella_parasuis	GCA_000021885	Proteobacteria|none|Proteobacteria|Gammaproteobacteria|Pasteurellales|Pasteurellaceae|Glaesserella|Glaesserella_parasuis|GCA_000021885	Gammaproteobacteria|none|Proteobacteria|Gammaproteobacteria|Pasteurellales|Pasteurellaceae|Glaesserella|Glaesserella_parasuis|GCA_000021885
GCA_001267175.1	Proteobacteria	Pseudomonadales	Gammaproteobacteria	Gammaproteobacteria	Bacteria	none	Proteobacteria	Gammaproteobacteria	Pseudomonadales	Pseudomonadaceae	Oblitimonas	Oblitimonas_alkaliphila	GCA_001267175	Proteobacteria|none|Proteobacteria|Gammaproteobacteria|Pseudomonadales|Pseudomonadaceae|Oblitimonas|Oblitimonas_alkaliphila|GCA_001267175	Gammaproteobacteria|none|Proteobacteria|Gammaproteobacteria|Pseudomonadales|Pseudomonadaceae|Oblitimonas|Oblitimonas_alkaliphila|GCA_001267175
GCA_900141795.1	Proteobacteria	Thiotrichales	Gammaproteobacteria	Gammaproteobacteria	Bacteria	none	Proteobacteria	Gammaproteobacteria	Thiotrichales	Piscirickettsiaceae	Sulfurivirga	Sulfurivirga_caldicuralii	GCA_900141795	Proteobacteria|none|Proteobacteria|Gammaproteobacteria|Thiotrichales|Piscirickettsiaceae|Sulfurivirga|Sulfurivirga_caldicuralii|GCA_900141795	Gammaproteobacteria|none|Proteobacteria|Gammaproteobacteria|Thiotrichales|Piscirickettsiaceae|Sulfurivirga|Sulfurivirga_caldicuralii|GCA_900141795
GCA_000011805.1	Proteobacteria	Vibrionales	Gammaproteobacteria	Gammaproteobacteria	Bacteria	none	Proteobacteria	Gammaproteobacteria	Vibrionales	Vibrionaceae	Aliivibrio	Aliivibrio_fischeri	GCA_000011805	Proteobacteria|none|Proteobacteria|Gammaproteobacteria|Vibrionales|Vibrionaceae|Aliivibrio|Aliivibrio_fischeri|GCA_000011805	Gammaproteobacteria|none|Proteobacteria|Gammaproteobacteria|Vibrionales|Vibrionaceae|Aliivibrio|Aliivibrio_fischeri|GCA_000011805
GCA_000429065.1	Proteobacteria	Xanthomonadales	Gammaproteobacteria	Gammaproteobacteria	Bacteria	none	Proteobacteria	Gammaproteobacteria	Xanthomonadales	Xanthomonadaceae	Silanimonas	Silanimonas_lenta	GCA_000429065	Proteobacteria|none|Proteobacteria|Gammaproteobacteria|Xanthomonadales|Xanthomonadaceae|Silanimonas|Silanimonas_lenta|GCA_000429065	Gammaproteobacteria|none|Proteobacteria|Gammaproteobacteria|Xanthomonadales|Xanthomonadaceae|Silanimonas|Silanimonas_lenta|GCA_000429065
GCA_000210915.2	Proteobacteria	Bacteriovoracales	Oligoflexia	Oligoflexia	Bacteria	none	Proteobacteria	Oligoflexia	Bacteriovoracales	Halobacteriovoraceae	Halobacteriovorax	Halobacteriovorax_marinus	GCA_000210915	Proteobacteria|none|Proteobacteria|Oligoflexia|Bacteriovoracales|Halobacteriovoraceae|Halobacteriovorax|Halobacteriovorax_marinus|GCA_000210915	Oligoflexia|none|Proteobacteria|Oligoflexia|Bacteriovoracales|Halobacteriovoraceae|Halobacteriovorax|Halobacteriovorax_marinus|GCA_000210915
GCA_000153765.1	Proteobacteria	Zetaproteobacteria_unass	Zetaproteobacteria	Zetaproteobacteria	Bacteria	none	Proteobacteria	Zetaproteobacteria	Mariprofundales	Mariprofundaceae	Mariprofundus	Mariprofundus_ferrooxydans	GCA_000153765	Proteobacteria|none|Proteobacteria|Zetaproteobacteria|Mariprofundales|Mariprofundaceae|Mariprofundus|Mariprofundus_ferrooxydans|GCA_000153765	Zetaproteobacteria|none|Proteobacteria|Zetaproteobacteria|Mariprofundales|Mariprofundaceae|Mariprofundus|Mariprofundus_ferrooxydans|GCA_000153765
GCA_002257665.1	Rhodothermaeota	Rhodothermaeota	Rhodothermia	Rhodothermia	Bacteria	none	Rhodothermaeota	Rhodothermia	Rhodothermales	Rubricoccaceae	Rubricoccus	Rubricoccus_marinus	GCA_002257665	Rhodothermaeota|none|Rhodothermaeota|Rhodothermia|Rhodothermales|Rubricoccaceae|Rubricoccus|Rubricoccus_marinus|GCA_002257665	Rhodothermia|none|Rhodothermaeota|Rhodothermia|Rhodothermales|Rubricoccaceae|Rubricoccus|Rubricoccus_marinus|GCA_002257665
GCA_000017605.1	Spirochaetes	Spirochaetes	Spirochaetia	Spirochaetia	Bacteria	none	Spirochaetes	Spirochaetia	none	Leptospiraceae	Leptospira	Leptospira_biflexa	GCA_000017605	Spirochaetes|none|Spirochaetes|Spirochaetia|none|Leptospiraceae|Leptospira|Leptospira_biflexa|GCA_000017605	Spirochaetia|none|Spirochaetes|Spirochaetia|none|Leptospiraceae|Leptospira|Leptospira_biflexa|GCA_000017605
GCA_000507245.1	Spirochaetes	Spirochaetes	Spirochaetia	Spirochaetia	Bacteria	none	Spirochaetes	Spirochaetia	Spirochaetales	Spirochaetaceae	Salinispira	Salinispira_pacifica	GCA_000507245	Spirochaetes|none|Spirochaetes|Spirochaetia|Spirochaetales|Spirochaetaceae|Salinispira|Salinispira_pacifica|GCA_000507245	Spirochaetia|none|Spirochaetes|Spirochaetia|Spirochaetales|Spirochaetaceae|Salinispira|Salinispira_pacifica|GCA_000507245
GCA_000208385.1	Spirochaetes	Spirochaetes	Spirochaetia	Spirochaetia	Bacteria	none	Spirochaetes	Spirochaetia	Spirochaetales	Spirochaetaceae	Sphaerochaeta	Sphaerochaeta_coccoides	GCA_000208385	Spirochaetes|none|Spirochaetes|Spirochaetia|Spirochaetales|Spirochaetaceae|Sphaerochaeta|Sphaerochaeta_coccoides|GCA_000208385	Spirochaetia|none|Spirochaetes|Spirochaetia|Spirochaetales|Spirochaetaceae|Sphaerochaeta|Sphaerochaeta_coccoides|GCA_000208385
GCA_000195275.1	Spirochaetes	Spirochaetes	Spirochaetia	Spirochaetia	Bacteria	none	Spirochaetes	Spirochaetia	Spirochaetales	Spirochaetaceae	Treponema	Treponema_succinifaciens	GCA_000195275	Spirochaetes|none|Spirochaetes|Spirochaetia|Spirochaetales|Spirochaetaceae|Treponema|Treponema_succinifaciens|GCA_000195275	Spirochaetia|none|Spirochaetes|Spirochaetia|Spirochaetales|Spirochaetaceae|Treponema|Treponema_succinifaciens|GCA_000195275
GCA_000266925.1	Synergistetes	Synergistetes	Synergistia	Synergistia	Bacteria	none	Synergistetes	Synergistia	Synergistales	Synergistaceae	Acetomicrobium	Acetomicrobium_mobile	GCA_000266925	Synergistetes|none|Synergistetes|Synergistia|Synergistales|Synergistaceae|Acetomicrobium|Acetomicrobium_mobile|GCA_000266925	Synergistia|none|Synergistetes|Synergistia|Synergistales|Synergistaceae|Acetomicrobium|Acetomicrobium_mobile|GCA_000266925
GCA_900177735.1	Synergistetes	Synergistetes	Synergistia	Synergistia	Bacteria	none	Synergistetes	Synergistia	Synergistales	Synergistaceae	Dethiosulfovibrio	Dethiosulfovibrio_salsuginis	GCA_900177735	Synergistetes|none|Synergistetes|Synergistia|Synergistales|Synergistaceae|Dethiosulfovibrio|Dethiosulfovibrio_salsuginis|GCA_900177735	Synergistia|none|Synergistetes|Synergistia|Synergistales|Synergistaceae|Dethiosulfovibrio|Dethiosulfovibrio_salsuginis|GCA_900177735
GCA_000024905.1	Synergistetes	Synergistetes	Synergistia	Synergistia	Bacteria	none	Synergistetes	Synergistia	Synergistales	Synergistaceae	Thermanaerovibrio	Thermanaerovibrio_acidaminovorans	GCA_000024905	Synergistetes|none|Synergistetes|Synergistia|Synergistales|Synergistaceae|Thermanaerovibrio|Thermanaerovibrio_acidaminovorans|GCA_000024905	Synergistia|none|Synergistetes|Synergistia|Synergistales|Synergistaceae|Thermanaerovibrio|Thermanaerovibrio_acidaminovorans|GCA_000024905
GCA_000967915.1	Tenericutes	Acholeplasmatales	Mollicutes	Mollicutes	Bacteria	none	Tenericutes	Mollicutes	Acholeplasmatales	Acholeplasmataceae	Acholeplasma	Acholeplasma_brassicae	GCA_000967915	Tenericutes|none|Tenericutes|Mollicutes|Acholeplasmatales|Acholeplasmataceae|Acholeplasma|Acholeplasma_brassicae|GCA_000967915	Mollicutes|none|Tenericutes|Mollicutes|Acholeplasmatales|Acholeplasmataceae|Acholeplasma|Acholeplasma_brassicae|GCA_000967915
GCA_003013295.1	Tenericutes	Entomoplasmatales	Mollicutes	Mollicutes	Bacteria	none	Tenericutes	Mollicutes	Entomoplasmatales	Entomoplasmataceae	Entomoplasma	Entomoplasma_luminosum	GCA_003013295	Tenericutes|none|Tenericutes|Mollicutes|Entomoplasmatales|Entomoplasmataceae|Entomoplasma|Entomoplasma_luminosum|GCA_003013295	Mollicutes|none|Tenericutes|Mollicutes|Entomoplasmatales|Entomoplasmataceae|Entomoplasma|Entomoplasma_luminosum|GCA_003013295
GCA_002290085.1	Tenericutes	Entomoplasmatales	Mollicutes	Mollicutes	Bacteria	none	Tenericutes	Mollicutes	Entomoplasmatales	Entomoplasmataceae	Mesoplasma	Mesoplasma_chauliocola	GCA_002290085	Tenericutes|none|Tenericutes|Mollicutes|Entomoplasmatales|Entomoplasmataceae|Mesoplasma|Mesoplasma_chauliocola|GCA_002290085	Mollicutes|none|Tenericutes|Mollicutes|Entomoplasmatales|Entomoplasmataceae|Mesoplasma|Mesoplasma_chauliocola|GCA_002290085
GCA_000089865.1	Tenericutes	Mycoplasmatales	Mollicutes	Mollicutes	Bacteria	none	Tenericutes	Mollicutes	Mycoplasmatales	Mycoplasmataceae	Mycoplasma	Mycoplasma_agalactiae	GCA_000089865	Tenericutes|none|Tenericutes|Mollicutes|Mycoplasmatales|Mycoplasmataceae|Mycoplasma|Mycoplasma_agalactiae|GCA_000089865	Mollicutes|none|Tenericutes|Mollicutes|Mycoplasmatales|Mycoplasmataceae|Mycoplasma|Mycoplasma_agalactiae|GCA_000089865
GCA_000421585.1	Thermodesulfobacteria	Thermodesulfobacteria	Thermodesulfobacteria	Thermodesulfobacteria	Bacteria	none	Thermodesulfobacteria	Thermodesulfobacteria	Thermodesulfobacteriales	Thermodesulfobacteriaceae	Thermodesulfatator	Thermodesulfatator_atlanticus	GCA_000421585	Thermodesulfobacteria|none|Thermodesulfobacteria|Thermodesulfobacteria|Thermodesulfobacteriales|Thermodesulfobacteriaceae|Thermodesulfatator|Thermodesulfatator_atlanticus|GCA_000421585	Thermodesulfobacteria|none|Thermodesulfobacteria|Thermodesulfobacteria|Thermodesulfobacteriales|Thermodesulfobacteriaceae|Thermodesulfatator|Thermodesulfatator_atlanticus|GCA_000421585
GCA_000746255.1	Thermodesulfobacteria	Thermodesulfobacteria	Thermodesulfobacteria	Thermodesulfobacteria	Bacteria	none	Thermodesulfobacteria	Thermodesulfobacteria	Thermodesulfobacteriales	Thermodesulfobacteriaceae	Thermodesulfobacterium	Thermodesulfobacterium_hydrogeniphilum	GCA_000746255	Thermodesulfobacteria|none|Thermodesulfobacteria|Thermodesulfobacteria|Thermodesulfobacteriales|Thermodesulfobacteriaceae|Thermodesulfobacterium|Thermodesulfobacterium_hydrogeniphilum|GCA_000746255	Thermodesulfobacteria|none|Thermodesulfobacteria|Thermodesulfobacteria|Thermodesulfobacteriales|Thermodesulfobacteriaceae|Thermodesulfobacterium|Thermodesulfobacterium_hydrogeniphilum|GCA_000746255
GCA_000023325.1	Thermotogae	Kosmotogales	Thermotogae	Thermotogae	Bacteria	none	Thermotogae	Thermotogae	Kosmotogales	Kosmotogaceae	Kosmotoga	Kosmotoga_olearia	GCA_000023325	Thermotogae|none|Thermotogae|Thermotogae|Kosmotogales|Kosmotogaceae|Kosmotoga|Kosmotoga_olearia|GCA_000023325	Thermotogae|none|Thermotogae|Thermotogae|Kosmotogales|Kosmotogaceae|Kosmotoga|Kosmotoga_olearia|GCA_000023325
GCA_002895525.1	Thermotogae	Petrotogales	Thermotogae	Thermotogae	Bacteria	none	Thermotogae	Thermotogae	Petrotogales	none	Petrotoga	Petrotoga_olearia	GCA_002895525	Thermotogae|none|Thermotogae|Thermotogae|Petrotogales|none|Petrotoga|Petrotoga_olearia|GCA_002895525	Thermotogae|none|Thermotogae|Thermotogae|Petrotogales|none|Petrotoga|Petrotoga_olearia|GCA_002895525
GCA_000767275.3	Thermotogae	Thermotogales	Thermotogae	Thermotogae	Bacteria	none	Thermotogae	Thermotogae	Thermotogales	Fervidobacteriaceae	Fervidobacterium	Fervidobacterium_islandicum	GCA_000767275	Thermotogae|none|Thermotogae|Thermotogae|Thermotogales|Fervidobacteriaceae|Fervidobacterium|Fervidobacterium_islandicum|GCA_000767275	Thermotogae|none|Thermotogae|Thermotogae|Thermotogales|Fervidobacteriaceae|Fervidobacterium|Fervidobacterium_islandicum|GCA_000767275
GCA_000816145.1	Thermotogae	Thermotogales	Thermotogae	Thermotogae	Bacteria	none	Thermotogae	Thermotogae	Thermotogales	Thermotogaceae	Pseudothermotoga	Pseudothermotoga_hypogea	GCA_000816145	Thermotogae|none|Thermotogae|Thermotogae|Thermotogales|Thermotogaceae|Pseudothermotoga|Pseudothermotoga_hypogea|GCA_000816145	Thermotogae|none|Thermotogae|Thermotogae|Thermotogales|Thermotogaceae|Pseudothermotoga|Pseudothermotoga_hypogea|GCA_000816145
GCA_000817245.1	Verrucomicrobia	Methylacidiphilales	Methylacidiphilae	Methylacidiphilae	Bacteria	none	Verrucomicrobia	Methylacidiphilae	Methylacidiphilales	Methylacidiphilaceae	Methylacidiphilum	Methylacidiphilum_kamchatkense	GCA_000817245	Verrucomicrobia|none|Verrucomicrobia|Methylacidiphilae|Methylacidiphilales|Methylacidiphilaceae|Methylacidiphilum|Methylacidiphilum_kamchatkense|GCA_000817245	Methylacidiphilae|none|Verrucomicrobia|Methylacidiphilae|Methylacidiphilales|Methylacidiphilaceae|Methylacidiphilum|Methylacidiphilum_kamchatkense|GCA_000817245
GCA_000019965.1	Verrucomicrobia	Opitutales	Opitutae	Opitutae	Bacteria	none	Verrucomicrobia	Opitutae	Opitutales	Opitutaceae	Opitutus	Opitutus_terrae	GCA_000019965	Verrucomicrobia|none|Verrucomicrobia|Opitutae|Opitutales|Opitutaceae|Opitutus|Opitutus_terrae|GCA_000019965	Opitutae|none|Verrucomicrobia|Opitutae|Opitutales|Opitutaceae|Opitutus|Opitutus_terrae|GCA_000019965
GCA_000378105.1	Verrucomicrobia	Verrucomicrobiales	Verrucomicrobiae	Verrucomicrobiae	Bacteria	none	Verrucomicrobia	Verrucomicrobiae	Verrucomicrobiales	Rubritaleaceae	Rubritalea	Rubritalea_marina	GCA_000378105	Verrucomicrobia|none|Verrucomicrobia|Verrucomicrobiae|Verrucomicrobiales|Rubritaleaceae|Rubritalea|Rubritalea_marina|GCA_000378105	Verrucomicrobiae|none|Verrucomicrobia|Verrucomicrobiae|Verrucomicrobiales|Rubritaleaceae|Rubritalea|Rubritalea_marina|GCA_000378105
GCA_000154225.1	Actinobacteria	Actinobacteria	Actinobacteria	Actinobacteria	Bacteria	none	Actinobacteria	Actinobacteria	Actinomycetales	Actinomycetaceae	Schaalia	Schaalia_odontolytica	GCA_000154225	Actinobacteria|none|Actinobacteria|Actinobacteria|Actinomycetales|Actinomycetaceae|Schaalia|Schaalia_odontolytica|GCA_000154225	Actinobacteria|none|Actinobacteria|Actinobacteria|Actinomycetales|Actinomycetaceae|Schaalia|Schaalia_odontolytica|GCA_000154225

## Sheet: 95_Arc1Bac0_stats_summary
MarkerID	Marker_filename	COG	COG_Category	COG_description	COG_process	Gene	NonRibosomal_Petitjean_markers	Core_Williams_markers	Bacterial_Coleman_markers	Overlap_markers	NrSpecies	NrClusters.x	SplitsPerCluster	TotalSplits	TotalSplits_to_Species	RankA	RankB	RankA_B	FullSet	best_50perc	best_25perc	worst_50perc	worst_25perc
01_COG0001	01_COG0001_linsi_BMGE	COG0001	H	Glutamate-1-semialdehyde_aminotransferase	Heme_biosynthesis	HemL	petitjean_M179R_b			petitjean_M179R_b	567	121	40.5	290	51.1	89	82	171	01_COG0001_linsi_BMGE			01_COG0001_linsi_BMGE	01_COG0001_linsi_BMGE
02_COG0008	02_COG0008_linsi_BMGE	COG0008	J	Glutamyl-_or_glutaminyl-tRNA_synthetase	Heme_biosynthesis	GlnS		williams_51		williams_51	670	150	28	273	40.7	40	39	79	02_COG0008_linsi_BMGE	02_COG0008_linsi_BMGE
03_COG0012	03_COG0012_linsi_BMGE	COG0012	J	Ribosome-binding_ATPase_YchF,_GTP1/OBG_family		GTP1			coleman_AB8	coleman_AB8	679	150	29.3	304	44.8	46	60	106	03_COG0012_linsi_BMGE			03_COG0012_linsi_BMGE
04_COG0015	04_COG0015_linsi_BMGE	COG0015	F	Adenylosuccinate_lyase	Purine_biosynthesis	PurB	petitjean_M157R_b			petitjean_M157R_b	593	131	34.4	264	44.5	72	59	131	04_COG0015_linsi_BMGE			04_COG0015_linsi_BMGE
05_COG0016	05_COG0016_linsi_BMGE	COG0016	J	Phenylalanyl-tRNA_synthetase_alpha_subunit	Aminoacyl-tRNA_synthetases	PheS	petitjean_M078R_b			petitjean_M078R_b	671	158	24.7	255	38	29	25	54	05_COG0016_linsi_BMGE	05_COG0016_linsi_BMGE	05_COG0016_linsi_BMGE
06_COG0017	06_COG0017_linsi_BMGE	COG0017	J	Aspartyl/asparaginyl-tRNA_synthetase	Aminoacyl-tRNA_synthetases	AsnS		williams_30		williams_30	679	161	32.9	324	47.7	64	74	138	06_COG0017_linsi_BMGE			06_COG0017_linsi_BMGE	06_COG0017_linsi_BMGE
07_COG0024	07_COG0024_linsi_BMGE	COG0024	J	Methionine_aminopeptidase		Map		williams_32		williams_32	686	157	29.9	290	42.3	47	46	93	07_COG0024_linsi_BMGE	07_COG0024_linsi_BMGE
08_COG0034	08_COG0034_linsi_BMGE	COG0034	F	Glutamine_phosphoribosylpyrophosphate_amidotransferase	Purine_biosynthesis	PurF	petitjean_M161R_b			petitjean_M161R_b	649	145	31.7	325	50.1	55	80	135	08_COG0034_linsi_BMGE			08_COG0034_linsi_BMGE
09_COG0043	09_COG0043_linsi_BMGE	COG0043	H	3-polyprenyl-4-hydroxybenzoate_decarboxylase	Ubiquinone_biosynthesis	UbiD	petitjean_M175R_b			petitjean_M175R_b	368	80	45	168	45.7	93	69	162	09_COG0043_linsi_BMGE			09_COG0043_linsi_BMGE	09_COG0043_linsi_BMGE
10_COG0046	10_COG0046_linsi_BMGE	COG0046	F	Phosphoribosylformylglycinamidine_(FGAM)_synthase,_synthetase_domain	Purine_biosynthesis	PurL1	petitjean_M156R_b			petitjean_M156R_b	534	115	32.2	231	43.3	60	54	114	10_COG0046_linsi_BMGE			10_COG0046_linsi_BMGE
11_COG0048	11_COG0048_linsi_BMGE	COG0048	J	Ribosomal_protein_S12	Ribosome_30S_subunit	RpsL		williams_6		williams_6	672	148	31.8	280	41.7	56	43	99	11_COG0048_linsi_BMGE			11_COG0048_linsi_BMGE
12_COG0049	12_COG0049_linsi_BMGE	COG0049	J	Ribosomal_protein_S7	Ribosome_30S_subunit	RpsG		williams_19	coleman_AB19	williams_19;coleman_AB19	672	145	17.9	230	34.2	7	12	19	12_COG0049_linsi_BMGE	12_COG0049_linsi_BMGE	12_COG0049_linsi_BMGE
13_COG0050	13_COG0050_linsi_BMGE	COG0050	J	Translation_elongation_factor_EF-Tu,_a_GTPase	Translation_factors	TufA			coleman_AB5	coleman_AB5	364	108	18.5	175	48.1	8	75	83	13_COG0050_linsi_BMGE	13_COG0050_linsi_BMGE
14_COG0051	14_COG0051_linsi_BMGE	COG0051	J	Ribosomal_protein_S10	Ribosome_30S_subunit	RpsJ		williams_14	coleman_AB30	williams_14;coleman_AB30	668	153	19.6	252	37.7	12	21	33	14_COG0051_linsi_BMGE	14_COG0051_linsi_BMGE	14_COG0051_linsi_BMGE
15_COG0052	15_COG0052_linsi_BMGE	COG0052	J	Ribosomal_protein_S2	Ribosome_30S_subunit	RpsB		williams_21	coleman_AB17	williams_21;coleman_AB17	678	152	17.1	227	33.5	5	8	13	15_COG0052_linsi_BMGE	15_COG0052_linsi_BMGE	15_COG0052_linsi_BMGE
16_COG0055	16_COG0055_linsi_BMGE	COG0055	C	FoF1-type_ATP_synthase,_beta_subunit	FoF1-type_ATP_synthase	AtpD			coleman_AB4	coleman_AB4	342	86	17.4	147	43	6	51	57	16_COG0055_linsi_BMGE	16_COG0055_linsi_BMGE
17_COG0064	17_COG0064_linsi_BMGE	COG0064	J	Asp-tRNAAsn/Glu-tRNAGln_amidotransferase_B_subunit	Aminoacyl-tRNA_synthetases	GatB	petitjean_M064R_b			petitjean_M064R_b	505	131	15.3	180	35.6	4	13	17	17_COG0064_linsi_BMGE	17_COG0064_linsi_BMGE	17_COG0064_linsi_BMGE
19_COG0072	19_COG0072_linsi_BMGE	COG0072	J	Phenylalanyl-tRNA_synthetase_beta_subunit	Aminoacyl-tRNA_synthetases	PheT		williams_25		williams_25	670	149	30.2	267	39.9	48	33	81	19_COG0072_linsi_BMGE	19_COG0072_linsi_BMGE
20_COG0080	20_COG0080_linsi_BMGE	COG0080	J	Ribosomal_protein_L11	Ribosome_50S_subunit	RplK		williams_33		williams_33	670	151	25.8	265	39.6	34	32	66	20_COG0080_linsi_BMGE	20_COG0080_linsi_BMGE
21_COG0081	21_COG0081_linsi_BMGE	COG0081	J	Ribosomal_protein_L1	Ribosome_50S_subunit	RplA		williams_27	coleman_AB21	williams_27;coleman_AB21	657	131	22.9	203	30.9	19	6	25	21_COG0081_linsi_BMGE	21_COG0081_linsi_BMGE	21_COG0081_linsi_BMGE
22_COG0083	22_COG0083_linsi_BMGE	COG0083	E	Homoserine_kinase	Threonine_biosynthesis	ThrB	petitjean_M142R_b			petitjean_M142R_b	577	121	48.8	372	64.5	94	93	187	22_COG0083_linsi_BMGE			22_COG0083_linsi_BMGE	22_COG0083_linsi_BMGE
23_COG0085	23_COG0085_linsi_BMGE	COG0085	K	DNA-directed_RNA_polymerase,_beta_subunit/140_kD_subunit	RNA_polymerase	RpoB		williams_7	coleman_AB1	williams_7;coleman_AB1	674	158	12.7	198	29.4	2	3	5	23_COG0085_linsi_BMGE	23_COG0085_linsi_BMGE	23_COG0085_linsi_BMGE
24_COG0086	24_COG0086_linsi_BMGE	COG0086	K	DNA-directed_RNA_polymerase,_beta'_subunit/160_kD_subunit	RNA_polymerase	RpoC		williams_18;williams_36		williams_18;williams_36	678	150	14	202	29.8	3	5	8	24_COG0086_linsi_BMGE	24_COG0086_linsi_BMGE	24_COG0086_linsi_BMGE
25_COG0087	25_COG0087_linsi_BMGE	COG0087	J	Ribosomal_protein_L3	Ribosome_50S_subunit	RplC			coleman_AB11	coleman_AB11	678	151	25.2	253	37.3	32	19	51	25_COG0087_linsi_BMGE	25_COG0087_linsi_BMGE	25_COG0087_linsi_BMGE
26_COG0090	26_COG0090_linsi_BMGE	COG0090	J	Ribosomal_protein_L2	Ribosome_50S_subunit	RplB		williams_29	coleman_AB14	williams_29;coleman_AB14	675	147	22.4	245	36.3	16	15	31	26_COG0090_linsi_BMGE	26_COG0090_linsi_BMGE	26_COG0090_linsi_BMGE
27_COG0091	27_COG0091_linsi_BMGE	COG0091	J	Ribosomal_protein_L22	Ribosome_50S_subunit	RplV		williams_38		williams_38	670	152	25.7	281	41.9	33	45	78	27_COG0091_linsi_BMGE	27_COG0091_linsi_BMGE
28_COG0092	28_COG0092_linsi_BMGE	COG0092	J	Ribosomal_protein_S3	Ribosome_30S_subunit	RpsC		williams_3		williams_3	677	162	19.1	230	34	11	11	22	28_COG0092_linsi_BMGE	28_COG0092_linsi_BMGE	28_COG0092_linsi_BMGE
29_COG0093	29_COG0093_linsi_BMGE	COG0093	J	Ribosomal_protein_L14	Ribosome_50S_subunit	RplN		williams_12	coleman_AB27	williams_12;coleman_AB27	683	155	21.3	248	36.3	15	16	31	29_COG0093_linsi_BMGE	29_COG0093_linsi_BMGE	29_COG0093_linsi_BMGE
30_COG0094	30_COG0094_linsi_BMGE	COG0094	J	Ribosomal_protein_L5	Ribosome_50S_subunit	RplE		williams_2	coleman_AB24	williams_2;coleman_AB24	688	155	23.9	265	38.5	22	27	49	30_COG0094_linsi_BMGE	30_COG0094_linsi_BMGE	30_COG0094_linsi_BMGE
31_COG0096	31_COG0096_linsi_BMGE	COG0096	J	Ribosomal_protein_S8	Ribosome_30S_subunit	RpsH		williams_9	coleman_AB29	williams_9;coleman_AB29	686	151	28.5	262	38.2	44	26	70	31_COG0096_linsi_BMGE	31_COG0096_linsi_BMGE
32_COG0097	32_COG0097_linsi_BMGE	COG0097	J	Ribosomal_protein_L6P/L9E	Ribosome_50S_subunit	RplF		williams_43	coleman_AB23	williams_43;coleman_AB23	684	152	31.6	291	42.5	53	49	102	32_COG0097_linsi_BMGE			32_COG0097_linsi_BMGE
33_COG0098	33_COG0098_linsi_BMGE	COG0098	J	Ribosomal_protein_S5	Ribosome_30S_subunit	RpsE		williams_24	coleman_AB15	williams_24;coleman_AB15	679	157	18.5	228	33.6	9	9	18	33_COG0098_linsi_BMGE	33_COG0098_linsi_BMGE	33_COG0098_linsi_BMGE
34_COG0099	34_COG0099_linsi_BMGE	COG0099	J	Ribosomal_protein_S13	Ribosome_30S_subunit	RpsM		williams_23	coleman_AB20	williams_23;coleman_AB20	680	148	25	273	40.1	30	36	66	34_COG0099_linsi_BMGE	34_COG0099_linsi_BMGE
35_COG0100	35_COG0100_linsi_BMGE	COG0100	J	Ribosomal_protein_S11	Ribosome_30S_subunit	RpsK		williams_17	coleman_AB26	williams_17;coleman_AB26	679	150	22.7	267	39.3	17	31	48	35_COG0100_linsi_BMGE	35_COG0100_linsi_BMGE	35_COG0100_linsi_BMGE
36_COG0102	36_COG0102_linsi_BMGE	COG0102	J	Ribosomal_protein_L13	Ribosome_50S_subunit	RplM		williams_13	coleman_AB25	williams_13;coleman_AB25	676	150	37.3	336	49.7	81	79	160	36_COG0102_linsi_BMGE			36_COG0102_linsi_BMGE	36_COG0102_linsi_BMGE
37_COG0103	37_COG0103_linsi_BMGE	COG0103	J	Ribosomal_protein_S9	Ribosome_30S_subunit	RpsI		williams_1		williams_1	677	148	25	255	37.7	31	22	53	37_COG0103_linsi_BMGE	37_COG0103_linsi_BMGE	37_COG0103_linsi_BMGE
38_COG0124	38_COG0124_linsi_BMGE	COG0124	J	Histidyl-tRNA_synthetase	Aminoacyl-tRNA_synthetases	HisS	petitjean_MA19R_b			petitjean_MA19R_b	661	152	28.3	291	44	43	57	100	38_COG0124_linsi_BMGE			38_COG0124_linsi_BMGE
39_COG0126	39_COG0126_linsi_BMGE	COG0126	G	3-phosphoglycerate_kinase	Glycolysis	Pgk	petitjean_M165R_b			petitjean_M165R_b	630	141	27.7	246	39	39	30	69	39_COG0126_linsi_BMGE	39_COG0126_linsi_BMGE
40_COG0127	40_COG0127_linsi_BMGE	COG0127	F	Inosine/xanthosine_triphosphate_pyrophosphatase,_all-alpha_NTP-PPase_family		RdgB	petitjean_M158R_b			petitjean_M158R_b	599	131	42	324	54.1	92	88	180	40_COG0127_linsi_BMGE			40_COG0127_linsi_BMGE	40_COG0127_linsi_BMGE
41_COG0130	41_COG0130_linsi_BMGE	COG0130	J	tRNA_U55_pseudouridine_synthase_TruB,_may_also_work_on_U342_of_tmRNA	tRNA_modification	TruB		williams_37		williams_37	628	128	32	272	43.3	59	55	114	41_COG0130_linsi_BMGE			41_COG0130_linsi_BMGE
42_COG0137	42_COG0137_linsi_BMGE	COG0137	E	Argininosuccinate_synthase	Arginine_biosynthesis	ArgG	petitjean_M138R_b			petitjean_M138R_b	564	119	33.6	235	41.7	69	44	113	42_COG0137_linsi_BMGE			42_COG0137_linsi_BMGE
43_COG0149	43_COG0149_linsi_BMGE	COG0149	G	Triosephosphate_isomerase	Glycolysis	TpiA			coleman_AB18	coleman_AB18	630	147	31.3	285	45.2	52	64	116	43_COG0149_linsi_BMGE			43_COG0149_linsi_BMGE
44_COG0150	44_COG0150_linsi_BMGE	COG0150	F	Phosphoribosylaminoimidazole_(AIR)_synthetase	Purine_biosynthesis	PurM	petitjean_M151R_b			petitjean_M151R_b	563	116	38.8	253	44.9	86	63	149	44_COG0150_linsi_BMGE			44_COG0150_linsi_BMGE	44_COG0150_linsi_BMGE
45_COG0164	45_COG0164_linsi_BMGE	COG0164	L	Ribonuclease_HII		RnhB		williams_45		williams_45	667	146	37.7	342	51.3	83	83	166	45_COG0164_linsi_BMGE			45_COG0164_linsi_BMGE	45_COG0164_linsi_BMGE
46_COG0180	46_COG0180_linsi_BMGE	COG0180	J	Tryptophanyl-tRNA_synthetase	Aminoacyl-tRNA_synthetases	TrpS		williams_49		williams_49	686	152	36.8	365	53.2	80	86	166	46_COG0180_linsi_BMGE			46_COG0180_linsi_BMGE	46_COG0180_linsi_BMGE
47_COG0181	47_COG0181_linsi_BMGE	COG0181	H	Porphobilinogen_deaminase	Heme_biosynthesis	HemC	petitjean_M176R_b			petitjean_M176R_b	403	78	26.9	165	40.9	38	40	78	47_COG0181_linsi_BMGE	47_COG0181_linsi_BMGE
48_COG0185	48_COG0185_linsi_BMGE	COG0185	J	Ribosomal_protein_S19	Ribosome_30S_subunit	RpsS		williams_11	coleman_AB28	williams_11;coleman_AB28	674	150	32.7	318	47.2	62	73	135	48_COG0185_linsi_BMGE			48_COG0185_linsi_BMGE
49_COG0186	49_COG0186_linsi_BMGE	COG0186	J	Ribosomal_protein_S17	Ribosome_30S_subunit	RpsQ		williams_40		williams_40	684	155	31.6	339	49.6	54	78	132	49_COG0186_linsi_BMGE			49_COG0186_linsi_BMGE
50_COG0197	50_COG0197_linsi_BMGE	COG0197	J	Ribosomal_protein_L16/L10AE	Ribosome_50S_subunit	RplP		williams_41	coleman_AB22	williams_41;coleman_AB22	672	150	28.7	301	44.8	45	61	106	50_COG0197_linsi_BMGE			50_COG0197_linsi_BMGE
51_COG0198	51_COG0198_linsi_BMGE	COG0198	J	Ribosomal_protein_L24	Ribosome_50S_subunit	RplX		williams_39		williams_39	646	157	31.8	361	55.9	57	90	147	51_COG0198_linsi_BMGE			51_COG0198_linsi_BMGE	51_COG0198_linsi_BMGE
52_COG0201	52_COG0201_linsi_BMGE	COG0201	U	Preprotein_translocase_subunit_SecY		SecY		williams_8	coleman_AB7	williams_8;coleman_AB7	671	157	10.8	199	29.7	1	4	5	52_COG0201_linsi_BMGE	52_COG0201_linsi_BMGE	52_COG0201_linsi_BMGE
53_COG0202	53_COG0202_linsi_BMGE	COG0202	K	DNA-directed_RNA_polymerase,_alpha_subunit/40_kD_subunit	RNA_polymerase	RpoA		williams_42		williams_42	673	149	22.8	248	36.8	18	18	36	53_COG0202_linsi_BMGE	53_COG0202_linsi_BMGE	53_COG0202_linsi_BMGE
54_COG0214	54_COG0214_linsi_BMGE	COG0214	H	Pyridoxal_5'-phosphate_synthase_subunit_PdxS	Pyridoxal_phosphate_biosynthesis	PdxS	petitjean_M171R_b			petitjean_M171R_b	315	70	38.6	141	44.8	85	62	147	54_COG0214_linsi_BMGE			54_COG0214_linsi_BMGE	54_COG0214_linsi_BMGE
55_COG0255	55_COG0255_linsi_BMGE	COG0255	J	Ribosomal_protein_L29	Ribosome_50S_subunit	RpmC		williams_35		williams_35	651	146	39	348	53.5	87	87	174	55_COG0255_linsi_BMGE			55_COG0255_linsi_BMGE	55_COG0255_linsi_BMGE
56_COG0258	56_COG0258_linsi_BMGE	COG0258	L	5'-3'_exonuclease_Xni/ExoIX_(flap_endonuclease)		ExoIX			coleman_AB10	coleman_AB10	674	171	28.1	291	43.2	42	52	94	56_COG0258_linsi_BMGE	56_COG0258_linsi_BMGE
57_COG0315	57_COG0315_linsi_BMGE	COG0315	H	Molybdenum_cofactor_biosynthesis_enzyme_MoaC	Molybdopterin_biosynthesis	MoaC	petitjean_MA53R_b			petitjean_MA53R_b	435	91	36.3	225	51.7	79	84	163	57_COG0315_linsi_BMGE			57_COG0315_linsi_BMGE	57_COG0315_linsi_BMGE
58_COG0343	58_COG0343_linsi_BMGE	COG0343	J	Queuine/archaeosine_tRNA-ribosyltransferase	tRNA_modification	Tgt	petitjean_M061R_b			petitjean_M061R_b	581	139	24.5	251	43.2	28	53	81	58_COG0343_linsi_BMGE	58_COG0343_linsi_BMGE
59_COG0391	59_COG0391_linsi_BMGE	COG0391	GH	Archaeal_2-phospho-L-lactate_transferase/Bacterial_gluconeogenesis_factor,_CofD/UPF0052_family		CofD	petitjean_M208R_b			petitjean_M208R_b	307	83	24.1	140	45.6	25	66	91	59_COG0391_linsi_BMGE	59_COG0391_linsi_BMGE
60_COG0409	60_COG0409_linsi_BMGE	COG0409	O	Hydrogenase_maturation_factor_HypD		HypD	petitjean_MA33R_b			petitjean_MA33R_b	248	75	37.3	143	57.7	82	92	174	60_COG0409_linsi_BMGE			60_COG0409_linsi_BMGE	60_COG0409_linsi_BMGE
61_COG0442	61_COG0442_linsi_BMGE	COG0442	J	Prolyl-tRNA_synthetase	Aminoacyl-tRNA_synthetases	ProS	petitjean_MA17R_b			petitjean_MA17R_b	696	157	35.7	318	45.7	77	70	147	61_COG0442_linsi_BMGE			61_COG0442_linsi_BMGE	61_COG0442_linsi_BMGE
62_COG0452	62_COG0452_linsi_BMGE	COG0452	H	Phosphopantothenoylcysteine_synthetase/decarboxylase_CoaBC	Pantothenate/CoA_biosynthesis	CoaBC	petitjean_M170R_b			petitjean_M170R_b	541	111	36	221	40.9	78	41	119	62_COG0452_linsi_BMGE			62_COG0452_linsi_BMGE
63_COG0459	63_COG0459_linsi_BMGE	COG0459	O	Chaperonin_GroEL_(HSP60_family)		GroEL		williams_34		williams_34	669	158	26.6	250	37.4	36	20	56	63_COG0459_linsi_BMGE	63_COG0459_linsi_BMGE
64_COG0460	64_COG0460_linsi_BMGE	COG0460	E	Homoserine_dehydrogenase	Methionine_biosynthesis	ThrA	petitjean_M143R_b			petitjean_M143R_b	440	93	33.3	176	40	65	34	99	64_COG0460_linsi_BMGE			64_COG0460_linsi_BMGE
65_COG0468	65_COG0468_linsi_BMGE	COG0468	L	RecA/RadA_recombinase		RecA		williams_28	coleman_AB9	williams_28;coleman_AB9	689	153	30.7	279	40.5	50	38	88	65_COG0468_linsi_BMGE	65_COG0468_linsi_BMGE
66_COG0470	66_COG0470_linsi_BMGE	COG0470	L	DNA_polymerase_III,_delta_prime_subunit		HolB		williams_31		williams_31	685	157	28	266	38.8	41	29	70	66_COG0470_linsi_BMGE	66_COG0470_linsi_BMGE
67_COG0480	67_COG0480_linsi_BMGE	COG0480	J	Translation_elongation_factor_EF-G,_a_GTPase	Translation_factors	FusA		williams_4	coleman_AB2	williams_4;coleman_AB2	679	161	18.6	245	36.1	10	14	24	67_COG0480_linsi_BMGE	67_COG0480_linsi_BMGE	67_COG0480_linsi_BMGE
68_COG0495	68_COG0495_linsi_BMGE	COG0495	J	Leucyl-tRNA_synthetase	Aminoacyl-tRNA_synthetases	LeuS		williams_50		williams_50	693	165	32.7	340	49.1	63	77	140	68_COG0495_linsi_BMGE			68_COG0495_linsi_BMGE	68_COG0495_linsi_BMGE
69_COG0496	69_COG0496_linsi_BMGE	COG0496	L	Broad_specificity_polyphosphatase_and_5'/3'-nucleotidase_SurE		SurE	petitjean_MA42R_b			petitjean_MA42R_b	377	91	23.1	167	44.3	20	58	78	69_COG0496_linsi_BMGE	69_COG0496_linsi_BMGE
70_COG0504	70_COG0504_linsi_BMGE	COG0504	F	CTP_synthase_(UTP-ammonia_lyase)	Pyrimidine_biosynthesis	PyrG			coleman_AB6	coleman_AB6	633	146	24	268	42.3	24	47	71	70_COG0504_linsi_BMGE	70_COG0504_linsi_BMGE
71_COG0522	71_COG0522_linsi_BMGE	COG0522	J	Ribosomal_protein_S4_or_related_protein	Ribosome_30S_subunit	RpsD		williams_44		williams_44	682	150	34	311	45.6	70	67	137	71_COG0522_linsi_BMGE			71_COG0522_linsi_BMGE	71_COG0522_linsi_BMGE
72_COG0525	72_COG0525_linsi_BMGE	COG0525	J	Valyl-tRNA_synthetase	Aminoacyl-tRNA_synthetases	ValS			coleman_AB3	coleman_AB3	689	180	23.9	313	45.4	23	65	88	72_COG0525_linsi_BMGE	72_COG0525_linsi_BMGE
73_COG0527	73_COG0527_linsi_BMGE	COG0527	E	Aspartate_kinase	Lysine_biosynthesis	MetL1	petitjean_M146R_b			petitjean_M146R_b	520	107	31.8	208	40	58	35	93	73_COG0527_linsi_BMGE	73_COG0527_linsi_BMGE
74_COG0528	74_COG0528_linsi_BMGE	COG0528	F	Uridylate_kinase	Pyrimidine_biosynthesis	PyrH	petitjean_M153R_b			petitjean_M153R_b	654	141	33.3	270	41.3	66	42	108	74_COG0528_linsi_BMGE			74_COG0528_linsi_BMGE
75_COG0532	75_COG0532_linsi_BMGE	COG0532	J	Translation_initiation_factor_IF-2,_a_GTPase	Translation_factors	InfB		williams_26		williams_26	666	158	19.6	224	33.6	13	10	23	75_COG0532_linsi_BMGE	75_COG0532_linsi_BMGE	75_COG0532_linsi_BMGE
76_COG0533	76_COG0533_linsi_BMGE	COG0533	J	tRNA_A37_threonylcarbamoyltransferase_TsaD	tRNA_modification	TsaD	petitjean_M010R_b	williams_10		petitjean_M010R_b;williams_10	666	150	26	244	36.6	35	17	52	76_COG0533_linsi_BMGE	76_COG0533_linsi_BMGE	76_COG0533_linsi_BMGE
77_COG0540	77_COG0540_linsi_BMGE	COG0540	F	Aspartate_carbamoyltransferase,_catalytic_subunit	Pyrimidine_biosynthesis	PyrB	petitjean_M149R_b			petitjean_M149R_b	603	129	32.6	275	45.6	61	68	129	77_COG0540_linsi_BMGE			77_COG0540_linsi_BMGE
78_COG0541	78_COG0541_linsi_BMGE	COG0541	U	Signal_recognition_particle_GTPase		Ffh	petitjean_M028R_b	williams_5		petitjean_M028R_b;williams_5	619	112	19.6	162	26.2	14	1	15	78_COG0541_linsi_BMGE	78_COG0541_linsi_BMGE	78_COG0541_linsi_BMGE
79_COG0552	79_COG0552_linsi_BMGE	COG0552	U	Signal_recognition_particle_GTPase_FtsY		FtsY	petitjean_MA23R_b	williams_16		petitjean_MA23R_b;williams_16	616	112	26.8	195	31.7	37	7	44	79_COG0552_linsi_BMGE	79_COG0552_linsi_BMGE	79_COG0552_linsi_BMGE
80_COG0587	80_COG0587_linsi_BMGE	COG0587	L	DNA_polymerase_III,_alpha_subunit		DnaE			coleman_AB16	coleman_AB16	439	139	23.7	232	52.8	21	85	106	80_COG0587_linsi_BMGE			80_COG0587_linsi_BMGE
81_COG0615	81_COG0615_linsi_BMGE	COG0615	M	Glycerol-3-phosphate_cytidylyltransferase,_cytidylyltransferase_family	Riboflavin/FAD_biosynthesis	TagD	petitjean_M029R_b			petitjean_M029R_b	535	138	39.9	364	68	88	94	182	81_COG0615_linsi_BMGE			81_COG0615_linsi_BMGE	81_COG0615_linsi_BMGE
82_COG0621	82_COG0621_linsi_BMGE	COG0621	J	tRNA_A37_methylthiotransferase_MiaB	tRNA_modification	MiaB	petitjean_M071R_b			petitjean_M071R_b	619	138	30.4	262	42.3	49	48	97	82_COG0621_linsi_BMGE			82_COG0621_linsi_BMGE
83_COG0689	83_COG0689_linsi_BMGE	COG0689	J	Ribonuclease_PH		Rph	petitjean_M066R_b			petitjean_M066R_b	490	94	35.1	185	37.8	74	23	97	83_COG0689_linsi_BMGE			83_COG0689_linsi_BMGE
84_COG0750	84_COG0750_linsi_BMGE	COG0750	OK	Membrane-associated_protease_RseP,_regulator_of_RpoE_activity		RseP	petitjean_M004R_b	williams_46		petitjean_M004R_b;williams_46	677	153	33.3	319	47.1	67	72	139	84_COG0750_linsi_BMGE			84_COG0750_linsi_BMGE	84_COG0750_linsi_BMGE
85_COG1155	85_COG1155_linsi_BMGE	COG1155	C	Archaeal/vacuolar-type_H+-ATPase_catalytic_subunit_A/Vma1	A/V-type_ATP_synthase	NtpA		williams_47		williams_47	344	85	34.1	147	42.7	71	50	121	85_COG1155_linsi_BMGE			85_COG1155_linsi_BMGE
86_COG1156	86_COG1156_linsi_BMGE	COG1156	C	Archaeal/vacuolar-type_H+-ATPase_subunit_B/Vma2	A/V-type_ATP_synthase	NtpB		williams_20		williams_20	603	137	30.7	243	40.3	51	37	88	86_COG1156_linsi_BMGE	86_COG1156_linsi_BMGE
87_COG1185	87_COG1185_linsi_BMGE	COG1185	J	Polyribonucleotide_nucleotidyltransferase_(polynucleotide_phosphorylase)		Pnp			coleman_AB13	coleman_AB13	624	150	34.7	350	56.1	73	91	164	87_COG1185_linsi_BMGE			87_COG1185_linsi_BMGE	87_COG1185_linsi_BMGE
88_COG1236	88_COG1236_linsi_BMGE	COG1236	J	RNA_processing_exonuclease,_beta-lactamase_fold,_Cft2_family		YSH1	petitjean_M032R_b			petitjean_M032R_b	688	157	38.2	345	50.1	84	81	165	88_COG1236_linsi_BMGE			88_COG1236_linsi_BMGE	88_COG1236_linsi_BMGE
89_COG1245	89_COG1245_linsi_BMGE	COG1245	J	Translation_initiation_factor_RLI1,_contains_Fe-S_and_AAA+_ATPase_domains		Rli1		williams_15		williams_15	699	160	35.6	381	54.5	76	89	165	89_COG1245_linsi_BMGE			89_COG1245_linsi_BMGE	89_COG1245_linsi_BMGE
90_COG2255	90_COG2255_linsi_BMGE	COG2255	L	Holliday_junction_resolvasome_RuvABC,_ATP-dependent_DNA_helicase_subunit_RuvB		RuvB			coleman_AB12	coleman_AB12	691	155	33.5	302	43.7	68	56	124	90_COG2255_linsi_BMGE			90_COG2255_linsi_BMGE
91_COG2262	91_COG2262_linsi_BMGE	COG2262	J	50S_ribosomal_subunit-associated_GTPase_HflX		HflX	petitjean_M195R_b			petitjean_M195R_b	646	124	41.9	301	46.6	91	71	162	91_COG2262_linsi_BMGE			91_COG2262_linsi_BMGE	91_COG2262_linsi_BMGE
92_COG2511	92_COG2511_linsi_BMGE	COG2511	J	Archaeal_Glu-tRNAGln_amidotransferase_subunit_E,_contains_GAD_domain		GatE	petitjean_M041R_b			petitjean_M041R_b	376	87	24.1	145	38.6	26	28	54	92_COG2511_linsi_BMGE	92_COG2511_linsi_BMGE	92_COG2511_linsi_BMGE
93_COG3425	93_COG3425_linsi_BMGE	COG3425	I	3-hydroxy-3-methylglutaryl_CoA_synthase	Isoprenoid_biosynthesis	PksG	petitjean_MA47R_b			petitjean_MA47R_b	560	119	35.3	270	48.2	75	76	151	93_COG3425_linsi_BMGE			93_COG3425_linsi_BMGE	93_COG3425_linsi_BMGE
94_COG5256	94_COG5256_linsi_BMGE	COG5256	J	Translation_elongation_factor_EF-1alpha_(GTPase)	Translation_factors	TEF1		williams_22		williams_22	483	86	40.7	183	37.9	90	24	114	94_COG5256_linsi_BMGE			94_COG5256_linsi_BMGE
95_COG5257	95_COG5257_linsi_BMGE	COG5257	J	Translation_initiation_factor_2,_gamma_subunit_(eIF-2gamma;_GTPase)	Translation_factors	GCD11		williams_48		williams_48	356	66	24.2	94	26.4	27	2	29	95_COG5257_linsi_BMGE	95_COG5257_linsi_BMGE	95_COG5257_linsi_BMGE

## Sheet: 95_Arc1Bac3_stats_summary
MarkerID	Marker_filename	COG	COG_Category	COG_description	COG_process	Gene	NonRibosomal_Petitjean_markers	Core_Williams_markers	Bacterial_Coleman_markers	Overlap_markers	NrSpecies	NrClusters.x	SplitsPerCluster	TotalSplits	TotalSplits_to_Species	RankA	RankB	RankA_B	FullSet	best_50perc	best_25perc	worst_50perc	worst_25perc
01_COG0001	01_COG0001_linsi_BMGE	COG0001	H	Glutamate-1-semialdehyde_aminotransferase	Heme_biosynthesis	HemL	petitjean_M179R_b			petitjean_M179R_b	567	155	38.7	316	55.7	93	84	177	01_COG0001_linsi_BMGE			01_COG0001_linsi_BMGE	01_COG0001_linsi_BMGE
02_COG0008	02_COG0008_linsi_BMGE	COG0008	J	Glutamyl-_or_glutaminyl-tRNA_synthetase	Heme_biosynthesis	GlnS		williams_51		williams_51	670	181	26	297	44.3	43	34	77	02_COG0008_linsi_BMGE	02_COG0008_linsi_BMGE
03_COG0012	03_COG0012_linsi_BMGE	COG0012	J	Ribosome-binding_ATPase_YchF,_GTP1/OBG_family		GTP1			coleman_AB8	coleman_AB8	679	182	26.4	323	47.6	46	55	101	03_COG0012_linsi_BMGE			03_COG0012_linsi_BMGE
04_COG0015	04_COG0015_linsi_BMGE	COG0015	F	Adenylosuccinate_lyase	Purine_biosynthesis	PurB	petitjean_M157R_b			petitjean_M157R_b	593	162	31.5	294	49.6	75	65	140	04_COG0015_linsi_BMGE			04_COG0015_linsi_BMGE	04_COG0015_linsi_BMGE
05_COG0016	05_COG0016_linsi_BMGE	COG0016	J	Phenylalanyl-tRNA_synthetase_alpha_subunit	Aminoacyl-tRNA_synthetases	PheS	petitjean_M078R_b			petitjean_M078R_b	671	196	21.4	288	42.9	22	26	48	05_COG0016_linsi_BMGE	05_COG0016_linsi_BMGE	05_COG0016_linsi_BMGE
06_COG0017	06_COG0017_linsi_BMGE	COG0017	J	Aspartyl/asparaginyl-tRNA_synthetase	Aminoacyl-tRNA_synthetases	AsnS		williams_30		williams_30	679	193	30.6	351	51.7	68	74	142	06_COG0017_linsi_BMGE			06_COG0017_linsi_BMGE	06_COG0017_linsi_BMGE
07_COG0024	07_COG0024_linsi_BMGE	COG0024	J	Methionine_aminopeptidase		Map		williams_32		williams_32	686	187	28.3	315	45.9	51	42	93	07_COG0024_linsi_BMGE	07_COG0024_linsi_BMGE
08_COG0034	08_COG0034_linsi_BMGE	COG0034	F	Glutamine_phosphoribosylpyrophosphate_amidotransferase	Purine_biosynthesis	PurF	petitjean_M161R_b			petitjean_M161R_b	649	175	29.1	342	52.7	53	78	131	08_COG0034_linsi_BMGE			08_COG0034_linsi_BMGE
09_COG0043	09_COG0043_linsi_BMGE	COG0043	H	3-polyprenyl-4-hydroxybenzoate_decarboxylase	Ubiquinone_biosynthesis	UbiD	petitjean_M175R_b			petitjean_M175R_b	368	97	37.1	178	48.4	89	59	148	09_COG0043_linsi_BMGE			09_COG0043_linsi_BMGE	09_COG0043_linsi_BMGE
10_COG0046	10_COG0046_linsi_BMGE	COG0046	F	Phosphoribosylformylglycinamidine_(FGAM)_synthase,_synthetase_domain	Purine_biosynthesis	PurL1	petitjean_M156R_b			petitjean_M156R_b	534	147	30.6	266	49.8	69	66	135	10_COG0046_linsi_BMGE			10_COG0046_linsi_BMGE	10_COG0046_linsi_BMGE
11_COG0048	11_COG0048_linsi_BMGE	COG0048	J	Ribosomal_protein_S12	Ribosome_30S_subunit	RpsL		williams_6		williams_6	672	180	30	338	50.3	63	70	133	11_COG0048_linsi_BMGE			11_COG0048_linsi_BMGE
12_COG0049	12_COG0049_linsi_BMGE	COG0049	J	Ribosomal_protein_S7	Ribosome_30S_subunit	RpsG		williams_19	coleman_AB19	williams_19;coleman_AB19	672	175	18.9	261	38.8	13	12	25	12_COG0049_linsi_BMGE	12_COG0049_linsi_BMGE	12_COG0049_linsi_BMGE
13_COG0050	13_COG0050_linsi_BMGE	COG0050	J	Translation_elongation_factor_EF-Tu,_a_GTPase	Translation_factors	TufA			coleman_AB5	coleman_AB5	364	140	17.9	201	55.2	12	83	95	13_COG0050_linsi_BMGE	13_COG0050_linsi_BMGE
14_COG0051	14_COG0051_linsi_BMGE	COG0051	J	Ribosomal_protein_S10	Ribosome_30S_subunit	RpsJ		williams_14	coleman_AB30	williams_14;coleman_AB30	668	184	17.4	297	44.5	10	35	45	14_COG0051_linsi_BMGE	14_COG0051_linsi_BMGE	14_COG0051_linsi_BMGE
15_COG0052	15_COG0052_linsi_BMGE	COG0052	J	Ribosomal_protein_S2	Ribosome_30S_subunit	RpsB		williams_21	coleman_AB17	williams_21;coleman_AB17	678	183	16.9	252	37.2	9	10	19	15_COG0052_linsi_BMGE	15_COG0052_linsi_BMGE	15_COG0052_linsi_BMGE
16_COG0055	16_COG0055_linsi_BMGE	COG0055	C	FoF1-type_ATP_synthase,_beta_subunit	FoF1-type_ATP_synthase	AtpD			coleman_AB4	coleman_AB4	342	119	15.1	171	50	7	68	75	16_COG0055_linsi_BMGE	16_COG0055_linsi_BMGE
17_COG0064	17_COG0064_linsi_BMGE	COG0064	J	Asp-tRNAAsn/Glu-tRNAGln_amidotransferase_B_subunit	Aminoacyl-tRNA_synthetases	GatB	petitjean_M064R_b			petitjean_M064R_b	505	161	13	214	42.4	3	23	26	17_COG0064_linsi_BMGE	17_COG0064_linsi_BMGE	17_COG0064_linsi_BMGE
19_COG0072	19_COG0072_linsi_BMGE	COG0072	J	Phenylalanyl-tRNA_synthetase_beta_subunit	Aminoacyl-tRNA_synthetases	PheT		williams_25		williams_25	670	182	25.8	293	43.7	42	28	70	19_COG0072_linsi_BMGE	19_COG0072_linsi_BMGE
20_COG0080	20_COG0080_linsi_BMGE	COG0080	J	Ribosomal_protein_L11	Ribosome_50S_subunit	RplK		williams_33		williams_33	670	181	26	324	48.4	44	60	104	20_COG0080_linsi_BMGE			20_COG0080_linsi_BMGE
21_COG0081	21_COG0081_linsi_BMGE	COG0081	J	Ribosomal_protein_L1	Ribosome_50S_subunit	RplA		williams_27	coleman_AB21	williams_27;coleman_AB21	657	163	23.3	240	36.5	29	7	36	21_COG0081_linsi_BMGE	21_COG0081_linsi_BMGE	21_COG0081_linsi_BMGE
22_COG0083	22_COG0083_linsi_BMGE	COG0083	E	Homoserine_kinase	Threonine_biosynthesis	ThrB	petitjean_M142R_b			petitjean_M142R_b	577	152	43.4	371	64.3	94	93	187	22_COG0083_linsi_BMGE			22_COG0083_linsi_BMGE	22_COG0083_linsi_BMGE
23_COG0085	23_COG0085_linsi_BMGE	COG0085	K	DNA-directed_RNA_polymerase,_beta_subunit/140_kD_subunit	RNA_polymerase	RpoB		williams_7	coleman_AB1	williams_7;coleman_AB1	674	194	12.4	237	35.2	2	4	6	23_COG0085_linsi_BMGE	23_COG0085_linsi_BMGE	23_COG0085_linsi_BMGE
24_COG0086	24_COG0086_linsi_BMGE	COG0086	K	DNA-directed_RNA_polymerase,_beta'_subunit/160_kD_subunit	RNA_polymerase	RpoC		williams_18;williams_36		williams_18;williams_36	678	185	13.5	239	35.3	4	5	9	24_COG0086_linsi_BMGE	24_COG0086_linsi_BMGE	24_COG0086_linsi_BMGE
25_COG0087	25_COG0087_linsi_BMGE	COG0087	J	Ribosomal_protein_L3	Ribosome_50S_subunit	RplC			coleman_AB11	coleman_AB11	678	180	22.2	266	39.2	25	14	39	25_COG0087_linsi_BMGE	25_COG0087_linsi_BMGE	25_COG0087_linsi_BMGE
26_COG0090	26_COG0090_linsi_BMGE	COG0090	J	Ribosomal_protein_L2	Ribosome_50S_subunit	RplB		williams_29	coleman_AB14	williams_29;coleman_AB14	675	178	21.9	272	40.3	24	18	42	26_COG0090_linsi_BMGE	26_COG0090_linsi_BMGE	26_COG0090_linsi_BMGE
27_COG0091	27_COG0091_linsi_BMGE	COG0091	J	Ribosomal_protein_L22	Ribosome_50S_subunit	RplV		williams_38		williams_38	670	182	24.2	302	45.1	33	37	70	27_COG0091_linsi_BMGE	27_COG0091_linsi_BMGE
28_COG0092	28_COG0092_linsi_BMGE	COG0092	J	Ribosomal_protein_S3	Ribosome_30S_subunit	RpsC		williams_3		williams_3	677	194	14.4	252	37.2	5	11	16	28_COG0092_linsi_BMGE	28_COG0092_linsi_BMGE	28_COG0092_linsi_BMGE
29_COG0093	29_COG0093_linsi_BMGE	COG0093	J	Ribosomal_protein_L14	Ribosome_50S_subunit	RplN		williams_12	coleman_AB27	williams_12;coleman_AB27	683	186	20.4	273	40	16	17	33	29_COG0093_linsi_BMGE	29_COG0093_linsi_BMGE	29_COG0093_linsi_BMGE
30_COG0094	30_COG0094_linsi_BMGE	COG0094	J	Ribosomal_protein_L5	Ribosome_50S_subunit	RplE		williams_2	coleman_AB24	williams_2;coleman_AB24	688	190	20.5	293	42.6	18	24	42	30_COG0094_linsi_BMGE	30_COG0094_linsi_BMGE	30_COG0094_linsi_BMGE
31_COG0096	31_COG0096_linsi_BMGE	COG0096	J	Ribosomal_protein_S8	Ribosome_30S_subunit	RpsH		williams_9	coleman_AB29	williams_9;coleman_AB29	686	181	25.4	274	39.9	41	15	56	31_COG0096_linsi_BMGE	31_COG0096_linsi_BMGE
32_COG0097	32_COG0097_linsi_BMGE	COG0097	J	Ribosomal_protein_L6P/L9E	Ribosome_50S_subunit	RplF		williams_43	coleman_AB23	williams_43;coleman_AB23	684	183	30.1	321	46.9	65	52	117	32_COG0097_linsi_BMGE			32_COG0097_linsi_BMGE
33_COG0098	33_COG0098_linsi_BMGE	COG0098	J	Ribosomal_protein_S5	Ribosome_30S_subunit	RpsE		williams_24	coleman_AB15	williams_24;coleman_AB15	679	184	17.4	249	36.7	11	8	19	33_COG0098_linsi_BMGE	33_COG0098_linsi_BMGE	33_COG0098_linsi_BMGE
34_COG0099	34_COG0099_linsi_BMGE	COG0099	J	Ribosomal_protein_S13	Ribosome_30S_subunit	RpsM		williams_23	coleman_AB20	williams_23;coleman_AB20	680	178	24.7	311	45.7	36	39	75	34_COG0099_linsi_BMGE	34_COG0099_linsi_BMGE
35_COG0100	35_COG0100_linsi_BMGE	COG0100	J	Ribosomal_protein_S11	Ribosome_30S_subunit	RpsK		williams_17	coleman_AB26	williams_17;coleman_AB26	679	181	20.4	308	45.4	17	38	55	35_COG0100_linsi_BMGE	35_COG0100_linsi_BMGE
36_COG0102	36_COG0102_linsi_BMGE	COG0102	J	Ribosomal_protein_L13	Ribosome_50S_subunit	RplM		williams_13	coleman_AB25	williams_13;coleman_AB25	676	180	34.4	351	51.9	83	76	159	36_COG0102_linsi_BMGE			36_COG0102_linsi_BMGE	36_COG0102_linsi_BMGE
37_COG0103	37_COG0103_linsi_BMGE	COG0103	J	Ribosomal_protein_S9	Ribosome_30S_subunit	RpsI		williams_1		williams_1	677	179	22.9	289	42.7	28	25	53	37_COG0103_linsi_BMGE	37_COG0103_linsi_BMGE	37_COG0103_linsi_BMGE
38_COG0124	38_COG0124_linsi_BMGE	COG0124	J	Histidyl-tRNA_synthetase	Aminoacyl-tRNA_synthetases	HisS	petitjean_MA19R_b			petitjean_MA19R_b	661	184	26.6	309	46.7	47	49	96	38_COG0124_linsi_BMGE	38_COG0124_linsi_BMGE
39_COG0126	39_COG0126_linsi_BMGE	COG0126	G	3-phosphoglycerate_kinase	Glycolysis	Pgk	petitjean_M165R_b			petitjean_M165R_b	630	175	22.3	275	43.7	26	29	55	39_COG0126_linsi_BMGE	39_COG0126_linsi_BMGE
40_COG0127	40_COG0127_linsi_BMGE	COG0127	F	Inosine/xanthosine_triphosphate_pyrophosphatase,_all-alpha_NTP-PPase_family		RdgB	petitjean_M158R_b			petitjean_M158R_b	599	164	38.4	346	57.8	92	87	179	40_COG0127_linsi_BMGE			40_COG0127_linsi_BMGE	40_COG0127_linsi_BMGE
41_COG0130	41_COG0130_linsi_BMGE	COG0130	J	tRNA_U55_pseudouridine_synthase_TruB,_may_also_work_on_U342_of_tmRNA	tRNA_modification	TruB		williams_37		williams_37	628	161	27.3	287	45.7	49	40	89	41_COG0130_linsi_BMGE	41_COG0130_linsi_BMGE
42_COG0137	42_COG0137_linsi_BMGE	COG0137	E	Argininosuccinate_synthase	Arginine_biosynthesis	ArgG	petitjean_M138R_b			petitjean_M138R_b	564	150	30.7	264	46.8	70	51	121	42_COG0137_linsi_BMGE			42_COG0137_linsi_BMGE
43_COG0149	43_COG0149_linsi_BMGE	COG0149	G	Triosephosphate_isomerase	Glycolysis	TpiA			coleman_AB18	coleman_AB18	630	178	29.8	310	49.2	59	64	123	43_COG0149_linsi_BMGE			43_COG0149_linsi_BMGE
44_COG0150	44_COG0150_linsi_BMGE	COG0150	F	Phosphoribosylaminoimidazole_(AIR)_synthetase	Purine_biosynthesis	PurM	petitjean_M151R_b			petitjean_M151R_b	563	145	35.9	281	49.9	85	67	152	44_COG0150_linsi_BMGE			44_COG0150_linsi_BMGE	44_COG0150_linsi_BMGE
45_COG0164	45_COG0164_linsi_BMGE	COG0164	L	Ribonuclease_HII		RnhB		williams_45		williams_45	667	178	33.7	352	52.8	79	79	158	45_COG0164_linsi_BMGE			45_COG0164_linsi_BMGE	45_COG0164_linsi_BMGE
46_COG0180	46_COG0180_linsi_BMGE	COG0180	J	Tryptophanyl-tRNA_synthetase	Aminoacyl-tRNA_synthetases	TrpS		williams_49		williams_49	686	185	36.2	404	58.9	86	90	176	46_COG0180_linsi_BMGE			46_COG0180_linsi_BMGE	46_COG0180_linsi_BMGE
47_COG0181	47_COG0181_linsi_BMGE	COG0181	H	Porphobilinogen_deaminase	Heme_biosynthesis	HemC	petitjean_M176R_b			petitjean_M176R_b	403	105	20	178	44.2	15	33	48	47_COG0181_linsi_BMGE	47_COG0181_linsi_BMGE	47_COG0181_linsi_BMGE
48_COG0185	48_COG0185_linsi_BMGE	COG0185	J	Ribosomal_protein_S19	Ribosome_30S_subunit	RpsS		williams_11	coleman_AB28	williams_11;coleman_AB28	674	178	30.9	331	49.1	72	62	134	48_COG0185_linsi_BMGE			48_COG0185_linsi_BMGE
49_COG0186	49_COG0186_linsi_BMGE	COG0186	J	Ribosomal_protein_S17	Ribosome_30S_subunit	RpsQ		williams_40		williams_40	684	188	29.3	362	52.9	55	80	135	49_COG0186_linsi_BMGE			49_COG0186_linsi_BMGE	49_COG0186_linsi_BMGE
50_COG0197	50_COG0197_linsi_BMGE	COG0197	J	Ribosomal_protein_L16/L10AE	Ribosome_50S_subunit	RplP		williams_41	coleman_AB22	williams_41;coleman_AB22	672	180	25	313	46.6	38	48	86	50_COG0197_linsi_BMGE	50_COG0197_linsi_BMGE
51_COG0198	51_COG0198_linsi_BMGE	COG0198	J	Ribosomal_protein_L24	Ribosome_50S_subunit	RplX		williams_39		williams_39	646	187	30.5	362	56	67	85	152	51_COG0198_linsi_BMGE			51_COG0198_linsi_BMGE	51_COG0198_linsi_BMGE
52_COG0201	52_COG0201_linsi_BMGE	COG0201	U	Preprotein_translocase_subunit_SecY		SecY		williams_8	coleman_AB7	williams_8;coleman_AB7	671	187	11.2	234	34.9	1	3	4	52_COG0201_linsi_BMGE	52_COG0201_linsi_BMGE	52_COG0201_linsi_BMGE
53_COG0202	53_COG0202_linsi_BMGE	COG0202	K	DNA-directed_RNA_polymerase,_alpha_subunit/40_kD_subunit	RNA_polymerase	RpoA		williams_42		williams_42	673	178	20.8	282	41.9	19	22	41	53_COG0202_linsi_BMGE	53_COG0202_linsi_BMGE	53_COG0202_linsi_BMGE
54_COG0214	54_COG0214_linsi_BMGE	COG0214	H	Pyridoxal_5'-phosphate_synthase_subunit_PdxS	Pyridoxal_phosphate_biosynthesis	PdxS	petitjean_M171R_b			petitjean_M171R_b	315	87	31	145	46	74	43	117	54_COG0214_linsi_BMGE			54_COG0214_linsi_BMGE
55_COG0255	55_COG0255_linsi_BMGE	COG0255	J	Ribosomal_protein_L29	Ribosome_50S_subunit	RpmC		williams_35		williams_35	651	174	35.1	347	53.3	84	81	165	55_COG0255_linsi_BMGE			55_COG0255_linsi_BMGE	55_COG0255_linsi_BMGE
56_COG0258	56_COG0258_linsi_BMGE	COG0258	L	5'-3'_exonuclease_Xni/ExoIX_(flap_endonuclease)		ExoIX			coleman_AB10	coleman_AB10	674	204	26	318	47.2	45	53	98	56_COG0258_linsi_BMGE			56_COG0258_linsi_BMGE
57_COG0315	57_COG0315_linsi_BMGE	COG0315	H	Molybdenum_cofactor_biosynthesis_enzyme_MoaC	Molybdopterin_biosynthesis	MoaC	petitjean_MA53R_b			petitjean_MA53R_b	435	119	32.8	248	57	78	86	164	57_COG0315_linsi_BMGE			57_COG0315_linsi_BMGE	57_COG0315_linsi_BMGE
58_COG0343	58_COG0343_linsi_BMGE	COG0343	J	Queuine/archaeosine_tRNA-ribosyltransferase	tRNA_modification	Tgt	petitjean_M061R_b			petitjean_M061R_b	581	171	24	275	47.3	31	54	85	58_COG0343_linsi_BMGE	58_COG0343_linsi_BMGE
59_COG0391	59_COG0391_linsi_BMGE	COG0391	GH	Archaeal_2-phospho-L-lactate_transferase/Bacterial_gluconeogenesis_factor,_CofD/UPF0052_family		CofD	petitjean_M208R_b			petitjean_M208R_b	307	103	19.4	147	47.9	14	58	72	59_COG0391_linsi_BMGE	59_COG0391_linsi_BMGE
60_COG0409	60_COG0409_linsi_BMGE	COG0409	O	Hydrogenase_maturation_factor_HypD		HypD	petitjean_MA33R_b			petitjean_MA33R_b	248	95	33.7	158	63.7	80	92	172	60_COG0409_linsi_BMGE			60_COG0409_linsi_BMGE	60_COG0409_linsi_BMGE
61_COG0442	61_COG0442_linsi_BMGE	COG0442	J	Prolyl-tRNA_synthetase	Aminoacyl-tRNA_synthetases	ProS	petitjean_MA17R_b			petitjean_MA17R_b	696	187	32.1	341	49	76	61	137	61_COG0442_linsi_BMGE			61_COG0442_linsi_BMGE	61_COG0442_linsi_BMGE
62_COG0452	62_COG0452_linsi_BMGE	COG0452	H	Phosphopantothenoylcysteine_synthetase/decarboxylase_CoaBC	Pantothenate/CoA_biosynthesis	CoaBC	petitjean_M170R_b			petitjean_M170R_b	541	144	29.9	237	43.8	62	30	92	62_COG0452_linsi_BMGE	62_COG0452_linsi_BMGE
63_COG0459	63_COG0459_linsi_BMGE	COG0459	O	Chaperonin_GroEL_(HSP60_family)		GroEL		williams_34		williams_34	669	190	22.6	277	41.4	27	20	47	63_COG0459_linsi_BMGE	63_COG0459_linsi_BMGE	63_COG0459_linsi_BMGE
64_COG0460	64_COG0460_linsi_BMGE	COG0460	E	Homoserine_dehydrogenase	Methionine_biosynthesis	ThrA	petitjean_M143R_b			petitjean_M143R_b	440	122	29.5	201	45.7	58	41	99	64_COG0460_linsi_BMGE			64_COG0460_linsi_BMGE
65_COG0468	65_COG0468_linsi_BMGE	COG0468	L	RecA/RadA_recombinase		RecA		williams_28	coleman_AB9	williams_28;coleman_AB9	689	183	27.3	319	46.3	50	45	95	65_COG0468_linsi_BMGE	65_COG0468_linsi_BMGE
66_COG0470	66_COG0470_linsi_BMGE	COG0470	L	DNA_polymerase_III,_delta_prime_subunit		HolB		williams_31		williams_31	685	190	25.3	300	43.8	40	31	71	66_COG0470_linsi_BMGE	66_COG0470_linsi_BMGE
67_COG0480	67_COG0480_linsi_BMGE	COG0480	J	Translation_elongation_factor_EF-G,_a_GTPase	Translation_factors	FusA		williams_4	coleman_AB2	williams_4;coleman_AB2	679	197	15.7	277	40.8	8	19	27	67_COG0480_linsi_BMGE	67_COG0480_linsi_BMGE	67_COG0480_linsi_BMGE
68_COG0495	68_COG0495_linsi_BMGE	COG0495	J	Leucyl-tRNA_synthetase	Aminoacyl-tRNA_synthetases	LeuS		williams_50		williams_50	693	198	30.3	362	52.2	66	77	143	68_COG0495_linsi_BMGE			68_COG0495_linsi_BMGE	68_COG0495_linsi_BMGE
69_COG0496	69_COG0496_linsi_BMGE	COG0496	L	Broad_specificity_polyphosphatase_and_5'/3'-nucleotidase_SurE		SurE	petitjean_MA42R_b			petitjean_MA42R_b	377	111	25.2	190	50.4	39	71	110	69_COG0496_linsi_BMGE			69_COG0496_linsi_BMGE
70_COG0504	70_COG0504_linsi_BMGE	COG0504	F	CTP_synthase_(UTP-ammonia_lyase)	Pyrimidine_biosynthesis	PyrG			coleman_AB6	coleman_AB6	633	180	21.7	294	46.4	23	47	70	70_COG0504_linsi_BMGE	70_COG0504_linsi_BMGE
71_COG0522	71_COG0522_linsi_BMGE	COG0522	J	Ribosomal_protein_S4_or_related_protein	Ribosome_30S_subunit	RpsD		williams_44		williams_44	682	181	30.9	326	47.8	73	56	129	71_COG0522_linsi_BMGE			71_COG0522_linsi_BMGE
72_COG0525	72_COG0525_linsi_BMGE	COG0525	J	Valyl-tRNA_synthetase	Aminoacyl-tRNA_synthetases	ValS			coleman_AB3	coleman_AB3	689	210	23.3	345	50.1	30	69	99	72_COG0525_linsi_BMGE			72_COG0525_linsi_BMGE
73_COG0527	73_COG0527_linsi_BMGE	COG0527	E	Aspartate_kinase	Lysine_biosynthesis	MetL1	petitjean_M146R_b			petitjean_M146R_b	520	140	29.3	243	46.7	56	50	106	73_COG0527_linsi_BMGE			73_COG0527_linsi_BMGE
74_COG0528	74_COG0528_linsi_BMGE	COG0528	F	Uridylate_kinase	Pyrimidine_biosynthesis	PyrH	petitjean_M153R_b			petitjean_M153R_b	654	172	28.5	288	44	52	32	84	74_COG0528_linsi_BMGE	74_COG0528_linsi_BMGE
75_COG0532	75_COG0532_linsi_BMGE	COG0532	J	Translation_initiation_factor_IF-2,_a_GTPase	Translation_factors	InfB		williams_26		williams_26	666	188	14.9	246	36.9	6	9	15	75_COG0532_linsi_BMGE	75_COG0532_linsi_BMGE	75_COG0532_linsi_BMGE
76_COG0533	76_COG0533_linsi_BMGE	COG0533	J	tRNA_A37_threonylcarbamoyltransferase_TsaD	tRNA_modification	TsaD	petitjean_M010R_b	williams_10		petitjean_M010R_b;williams_10	666	181	24.3	276	41.4	34	21	55	76_COG0533_linsi_BMGE	76_COG0533_linsi_BMGE
77_COG0540	77_COG0540_linsi_BMGE	COG0540	F	Aspartate_carbamoyltransferase,_catalytic_subunit	Pyrimidine_biosynthesis	PyrB	petitjean_M149R_b			petitjean_M149R_b	603	160	30	307	50.9	64	72	136	77_COG0540_linsi_BMGE			77_COG0540_linsi_BMGE	77_COG0540_linsi_BMGE
78_COG0541	78_COG0541_linsi_BMGE	COG0541	U	Signal_recognition_particle_GTPase		Ffh	petitjean_M028R_b	williams_5		petitjean_M028R_b;williams_5	619	139	20.9	187	30.2	20	2	22	78_COG0541_linsi_BMGE	78_COG0541_linsi_BMGE	78_COG0541_linsi_BMGE
79_COG0552	79_COG0552_linsi_BMGE	COG0552	U	Signal_recognition_particle_GTPase_FtsY		FtsY	petitjean_MA23R_b	williams_16		petitjean_MA23R_b;williams_16	616	139	24.5	223	36.2	35	6	41	79_COG0552_linsi_BMGE	79_COG0552_linsi_BMGE	79_COG0552_linsi_BMGE
80_COG0587	80_COG0587_linsi_BMGE	COG0587	L	DNA_polymerase_III,_alpha_subunit		DnaE			coleman_AB16	coleman_AB16	439	167	24	263	59.9	32	91	123	80_COG0587_linsi_BMGE			80_COG0587_linsi_BMGE
81_COG0615	81_COG0615_linsi_BMGE	COG0615	M	Glycerol-3-phosphate_cytidylyltransferase,_cytidylyltransferase_family	Riboflavin/FAD_biosynthesis	TagD	petitjean_M029R_b			petitjean_M029R_b	535	163	38	365	68.2	91	94	185	81_COG0615_linsi_BMGE			81_COG0615_linsi_BMGE	81_COG0615_linsi_BMGE
82_COG0621	82_COG0621_linsi_BMGE	COG0621	J	tRNA_A37_methylthiotransferase_MiaB	tRNA_modification	MiaB	petitjean_M071R_b			petitjean_M071R_b	619	172	26.7	296	47.8	48	57	105	82_COG0621_linsi_BMGE			82_COG0621_linsi_BMGE
83_COG0689	83_COG0689_linsi_BMGE	COG0689	J	Ribonuclease_PH		Rph	petitjean_M066R_b			petitjean_M066R_b	490	114	29.8	190	38.8	60	13	73	83_COG0689_linsi_BMGE	83_COG0689_linsi_BMGE
84_COG0750	84_COG0750_linsi_BMGE	COG0750	OK	Membrane-associated_protease_RseP,_regulator_of_RpoE_activity		RseP	petitjean_M004R_b	williams_46		petitjean_M004R_b;williams_46	677	185	30.8	351	51.8	71	75	146	84_COG0750_linsi_BMGE			84_COG0750_linsi_BMGE	84_COG0750_linsi_BMGE
85_COG1155	85_COG1155_linsi_BMGE	COG1155	C	Archaeal/vacuolar-type_H+-ATPase_catalytic_subunit_A/Vma1	A/V-type_ATP_synthase	NtpA		williams_47		williams_47	344	91	34.1	149	43.3	81	27	108	85_COG1155_linsi_BMGE			85_COG1155_linsi_BMGE
86_COG1156	86_COG1156_linsi_BMGE	COG1156	C	Archaeal/vacuolar-type_H+-ATPase_subunit_B/Vma2	A/V-type_ATP_synthase	NtpB		williams_20		williams_20	603	172	29.1	278	46.1	54	44	98	86_COG1156_linsi_BMGE			86_COG1156_linsi_BMGE
87_COG1185	87_COG1185_linsi_BMGE	COG1185	J	Polyribonucleotide_nucleotidyltransferase_(polynucleotide_phosphorylase)		Pnp			coleman_AB13	coleman_AB13	624	181	32.6	367	58.8	77	89	166	87_COG1185_linsi_BMGE			87_COG1185_linsi_BMGE	87_COG1185_linsi_BMGE
88_COG1236	88_COG1236_linsi_BMGE	COG1236	J	RNA_processing_exonuclease,_beta-lactamase_fold,_Cft2_family		YSH1	petitjean_M032R_b			petitjean_M032R_b	688	191	36.6	377	54.8	87	82	169	88_COG1236_linsi_BMGE			88_COG1236_linsi_BMGE	88_COG1236_linsi_BMGE
89_COG1245	89_COG1245_linsi_BMGE	COG1245	J	Translation_initiation_factor_RLI1,_contains_Fe-S_and_AAA+_ATPase_domains		Rli1		williams_15		williams_15	699	193	34.2	409	58.5	82	88	170	89_COG1245_linsi_BMGE			89_COG1245_linsi_BMGE	89_COG1245_linsi_BMGE
90_COG2255	90_COG2255_linsi_BMGE	COG2255	L	Holliday_junction_resolvasome_RuvABC,_ATP-dependent_DNA_helicase_subunit_RuvB		RuvB			coleman_AB12	coleman_AB12	691	184	29.3	320	46.3	57	46	103	90_COG2255_linsi_BMGE			90_COG2255_linsi_BMGE
91_COG2262	91_COG2262_linsi_BMGE	COG2262	J	50S_ribosomal_subunit-associated_GTPase_HflX		HflX	petitjean_M195R_b			petitjean_M195R_b	646	153	37.9	332	51.4	90	73	163	91_COG2262_linsi_BMGE			91_COG2262_linsi_BMGE	91_COG2262_linsi_BMGE
92_COG2511	92_COG2511_linsi_BMGE	COG2511	J	Archaeal_Glu-tRNAGln_amidotransferase_subunit_E,_contains_GAD_domain		GatE	petitjean_M041R_b			petitjean_M041R_b	376	93	24.7	150	39.9	37	16	53	92_COG2511_linsi_BMGE	92_COG2511_linsi_BMGE	92_COG2511_linsi_BMGE
93_COG3425	93_COG3425_linsi_BMGE	COG3425	I	3-hydroxy-3-methylglutaryl_CoA_synthase	Isoprenoid_biosynthesis	PksG	petitjean_MA47R_b			petitjean_MA47R_b	560	151	29.8	275	49.1	61	63	124	93_COG3425_linsi_BMGE			93_COG3425_linsi_BMGE
94_COG5256	94_COG5256_linsi_BMGE	COG5256	J	Translation_elongation_factor_EF-1alpha_(GTPase)	Translation_factors	TEF1		williams_22		williams_22	483	109	36.7	217	44.9	88	36	124	94_COG5256_linsi_BMGE			94_COG5256_linsi_BMGE
95_COG5257	95_COG5257_linsi_BMGE	COG5257	J	Translation_initiation_factor_2,_gamma_subunit_(eIF-2gamma;_GTPase)	Translation_factors	GCD11		williams_48		williams_48	356	75	21.3	99	27.8	21	1	22	95_COG5257_linsi_BMGE	95_COG5257_linsi_BMGE	95_COG5257_linsi_BMGE

## Sheet: 27Top_v3_Arc1Bac0_stats_summary
MarkerID	Marker_filename	COG	COG_Category	COG_description	COG_process	Gene	NonRibosomal_Petitjean_markers	Core_Williams_markers	Bacterial_Coleman_markers	Overlap_markers	NrSpecies	NrClusters.x	SplitsPerCluster	TotalSplits	TotalSplits_to_Species	RankA	RankB	RankA_B	FullSet	best_50perc	best_25perc	worst_50perc	worst_25perc
05_COG0016	05_COG0016_linsi_BMGE	COG0016	J	Phenylalanyl-tRNA_synthetase_alpha_subunit	Aminoacyl-tRNA_synthetases	PheS	petitjean_M078R_b			petitjean_M078R_b	653	155	22.6	247	37.8	18	23	41	05_COG0016_mafft_linsi_BMGE			05_COG0016_mafft_linsi_BMGE	05_COG0016_mafft_linsi_BMGE
12_COG0049	12_COG0049_linsi_BMGE	COG0049	J	Ribosomal_protein_S7	Ribosome_30S_subunit	RpsG		williams_19	coleman_AB19	williams_19;coleman_AB19	672	146	18.5	222	33	9	8	17	12_COG0049_mafft_linsi_BMGE	12_COG0049_mafft_linsi_BMGE	12_COG0049_mafft_linsi_BMGE
14_COG0051	14_COG0051_linsi_BMGE	COG0051	J	Ribosomal_protein_S10	Ribosome_30S_subunit	RpsJ		williams_14	coleman_AB30	williams_14;coleman_AB30	664	146	21.2	238	35.8	15	16	31	14_COG0051_mafft_linsi_BMGE			14_COG0051_mafft_linsi_BMGE
15_COG0052	15_COG0052_linsi_BMGE	COG0052	J	Ribosomal_protein_S2	Ribosome_30S_subunit	RpsB		williams_21	coleman_AB17	williams_21;coleman_AB17	675	156	15.4	224	33.2	4	10	14	15_COG0052_mafft_linsi_BMGE	15_COG0052_mafft_linsi_BMGE	15_COG0052_mafft_linsi_BMGE
17_COG0064	17_COG0064_linsi_BMGE	COG0064	J	Asp-tRNAAsn/Glu-tRNAGln_amidotransferase_B_subunit	Aminoacyl-tRNA_synthetases	GatB	petitjean_M064R_b			petitjean_M064R_b	502	131	16	183	36.5	6	19	25	17_COG0064_mafft_linsi_BMGE	17_COG0064_mafft_linsi_BMGE
21_COG0081	21_COG0081_linsi_BMGE	COG0081	J	Ribosomal_protein_L1	Ribosome_50S_subunit	RplA		williams_27	coleman_AB21	williams_27;coleman_AB21	655	137	25.5	222	33.9	23	12	35	21_COG0081_mafft_linsi_BMGE			21_COG0081_mafft_linsi_BMGE
23_COG0085	23_COG0085_linsi_BMGE	COG0085	K	DNA-directed_RNA_polymerase,_beta_subunit/140_kD_subunit	RNA_polymerase	RpoB		williams_7	coleman_AB1	williams_7;coleman_AB1	672	155	10.3	196	29.2	2	3	5	23_COG0085_mafft_linsi_BMGE	23_COG0085_mafft_linsi_BMGE	23_COG0085_mafft_linsi_BMGE
24_COG0086	24_COG0086_linsi_BMGE	COG0086	K	DNA-directed_RNA_polymerase,_beta'_subunit/160_kD_subunit	RNA_polymerase	RpoC		williams_18;williams_36		williams_18;williams_36	674	161	9.9	200	29.7	1	4	5	24_COG0086_mafft_linsi_BMGE	24_COG0086_mafft_linsi_BMGE	24_COG0086_mafft_linsi_BMGE
25_COG0087	25_COG0087_linsi_BMGE	COG0087	J	Ribosomal_protein_L3	Ribosome_50S_subunit	RplC			coleman_AB11	coleman_AB11	677	150	26	243	35.9	24	17	41	25_COG0087_mafft_linsi_BMGE			25_COG0087_mafft_linsi_BMGE	25_COG0087_mafft_linsi_BMGE
26_COG0090	26_COG0090_linsi_BMGE	COG0090	J	Ribosomal_protein_L2	Ribosome_50S_subunit	RplB		williams_29	coleman_AB14	williams_29;coleman_AB14	675	157	18.5	240	35.6	10	15	25	26_COG0090_mafft_linsi_BMGE	26_COG0090_mafft_linsi_BMGE
27_COG0091	27_COG0091_linsi_BMGE	COG0091	J	Ribosomal_protein_L22	Ribosome_50S_subunit	RplV		williams_38		williams_38	670	151	29.1	284	42.4	26	27	53	27_COG0091_mafft_linsi_BMGE			27_COG0091_mafft_linsi_BMGE	27_COG0091_mafft_linsi_BMGE
28_COG0092	28_COG0092_linsi_BMGE	COG0092	J	Ribosomal_protein_S3	Ribosome_30S_subunit	RpsC		williams_3		williams_3	675	151	19.2	224	33.2	13	11	24	28_COG0092_mafft_linsi_BMGE	28_COG0092_mafft_linsi_BMGE
29_COG0093	29_COG0093_linsi_BMGE	COG0093	J	Ribosomal_protein_L14	Ribosome_50S_subunit	RplN		williams_12	coleman_AB27	williams_12;coleman_AB27	683	155	18.7	252	36.9	11	21	32	29_COG0093_mafft_linsi_BMGE			29_COG0093_mafft_linsi_BMGE
30_COG0094	30_COG0094_linsi_BMGE	COG0094	J	Ribosomal_protein_L5	Ribosome_50S_subunit	RplE		williams_2	coleman_AB24	williams_2;coleman_AB24	685	153	20.9	252	36.8	14	20	34	30_COG0094_mafft_linsi_BMGE			30_COG0094_mafft_linsi_BMGE
31_COG0096	31_COG0096_linsi_BMGE	COG0096	J	Ribosomal_protein_S8	Ribosome_30S_subunit	RpsH		williams_9	coleman_AB29	williams_9;coleman_AB29	681	149	27.5	239	35.1	25	13	38	31_COG0096_mafft_linsi_BMGE			31_COG0096_mafft_linsi_BMGE	31_COG0096_mafft_linsi_BMGE
33_COG0098	33_COG0098_linsi_BMGE	COG0098	J	Ribosomal_protein_S5	Ribosome_30S_subunit	RpsE		williams_24	coleman_AB15	williams_24;coleman_AB15	677	152	19.1	217	32.1	12	7	19	33_COG0098_mafft_linsi_BMGE	33_COG0098_mafft_linsi_BMGE
34_COG0099	34_COG0099_linsi_BMGE	COG0099	J	Ribosomal_protein_S13	Ribosome_30S_subunit	RpsM		williams_23	coleman_AB20	williams_23;coleman_AB20	680	150	32	264	38.8	27	24	51	34_COG0099_mafft_linsi_BMGE			34_COG0099_mafft_linsi_BMGE	34_COG0099_mafft_linsi_BMGE
35_COG0100	35_COG0100_linsi_BMGE	COG0100	J	Ribosomal_protein_S11	Ribosome_30S_subunit	RpsK		williams_17	coleman_AB26	williams_17;coleman_AB26	679	151	21.9	255	37.6	16	22	38	35_COG0100_mafft_linsi_BMGE			35_COG0100_mafft_linsi_BMGE	35_COG0100_mafft_linsi_BMGE
37_COG0103	37_COG0103_linsi_BMGE	COG0103	J	Ribosomal_protein_S9	Ribosome_30S_subunit	RpsI		williams_1		williams_1	677	153	24.2	264	39	22	25	47	37_COG0103_mafft_linsi_BMGE			37_COG0103_mafft_linsi_BMGE	37_COG0103_mafft_linsi_BMGE
52_COG0201	52_COG0201_linsi_BMGE	COG0201	U	Preprotein_translocase_subunit_SecY		SecY		williams_8	coleman_AB7	williams_8;coleman_AB7	671	161	11.8	211	31.4	3	6	9	52_COG0201_mafft_linsi_BMGE	52_COG0201_mafft_linsi_BMGE	52_COG0201_mafft_linsi_BMGE
53_COG0202	53_COG0202_linsi_BMGE	COG0202	K	DNA-directed_RNA_polymerase,_alpha_subunit/40_kD_subunit	RNA_polymerase	RpoA		williams_42		williams_42	672	157	23.6	265	39.4	21	26	47	53_COG0202_mafft_linsi_BMGE			53_COG0202_mafft_linsi_BMGE	53_COG0202_mafft_linsi_BMGE
67_COG0480	67_COG0480_linsi_BMGE	COG0480	J	Translation_elongation_factor_EF-G,_a_GTPase	Translation_factors	FusA		williams_4	coleman_AB2	williams_4;coleman_AB2	673	161	18	245	36.4	8	18	26	67_COG0480_mafft_linsi_BMGE	67_COG0480_mafft_linsi_BMGE		67_COG0480_mafft_linsi_BMGE
75_COG0532	75_COG0532_linsi_BMGE	COG0532	J	Translation_initiation_factor_IF-2,_a_GTPase	Translation_factors	InfB		williams_26		williams_26	662	157	15.9	219	33.1	5	9	14	75_COG0532_mafft_linsi_BMGE	75_COG0532_mafft_linsi_BMGE	75_COG0532_mafft_linsi_BMGE
76_COG0533	76_COG0533_linsi_BMGE	COG0533	J	tRNA_A37_threonylcarbamoyltransferase_TsaD	tRNA_modification	TsaD	petitjean_M010R_b	williams_10		petitjean_M010R_b;williams_10	664	150	23.3	235	35.4	20	14	34	76_COG0533_mafft_linsi_BMGE			76_COG0533_mafft_linsi_BMGE
78_COG0541	78_COG0541_linsi_BMGE	COG0541	U	Signal_recognition_particle_GTPase		Ffh	petitjean_M028R_b	williams_5		petitjean_M028R_b;williams_5	618	113	17.7	160	25.9	7	2	9	78_COG0541_mafft_linsi_BMGE	78_COG0541_mafft_linsi_BMGE	78_COG0541_mafft_linsi_BMGE
79_COG0552	79_COG0552_linsi_BMGE	COG0552	U	Signal_recognition_particle_GTPase_FtsY		FtsY	petitjean_MA23R_b	williams_16		petitjean_MA23R_b;williams_16	614	112	23.2	185	30.1	19	5	24	79_COG0552_mafft_linsi_BMGE	79_COG0552_mafft_linsi_BMGE
95_COG5257	95_COG5257_linsi_BMGE	COG5257	J	Translation_initiation_factor_2,_gamma_subunit_(eIF-2gamma;_GTPase)	Translation_factors	GCD11		williams_48		williams_48	356	67	22.4	92	25.8	17	1	18	95_COG5257_mafft_linsi_BMGE	95_COG5257_mafft_linsi_BMGE

## Sheet: 27Top_v3_Arc1Bac3_stats_summary
MarkerID	Marker_filename	COG	COG_Category	COG_description	COG_process	Gene	NonRibosomal_Petitjean_markers	Core_Williams_markers	Bacterial_Coleman_markers	Overlap_markers	NrSpecies	NrClusters.x	SplitsPerCluster	TotalSplits	TotalSplits_to_Species	RankA	RankB	RankA_B	FullSet	best_50perc	best_25perc	worst_50perc	worst_25perc
05_COG0016	05_COG0016_linsi_BMGE	COG0016	J	Phenylalanyl-tRNA_synthetase_alpha_subunit	Aminoacyl-tRNA_synthetases	PheS	petitjean_M078R_b			petitjean_M078R_b	653	191	19.4	277	42.4	16	21	37	05_COG0016_mafft_linsi_BMGE			05_COG0016_mafft_linsi_BMGE	05_COG0016_mafft_linsi_BMGE
12_COG0049	12_COG0049_linsi_BMGE	COG0049	J	Ribosomal_protein_S7	Ribosome_30S_subunit	RpsG		williams_19	coleman_AB19	williams_19;coleman_AB19	672	176	18.2	248	36.9	12	9	21	12_COG0049_mafft_linsi_BMGE	12_COG0049_mafft_linsi_BMGE
14_COG0051	14_COG0051_linsi_BMGE	COG0051	J	Ribosomal_protein_S10	Ribosome_30S_subunit	RpsJ		williams_14	coleman_AB30	williams_14;coleman_AB30	664	175	17.1	260	39.2	9	14	23	14_COG0051_mafft_linsi_BMGE	14_COG0051_mafft_linsi_BMGE
15_COG0052	15_COG0052_linsi_BMGE	COG0052	J	Ribosomal_protein_S2	Ribosome_30S_subunit	RpsB		williams_21	coleman_AB17	williams_21;coleman_AB17	675	186	14.5	249	36.9	6	10	16	15_COG0052_mafft_linsi_BMGE	15_COG0052_mafft_linsi_BMGE	15_COG0052_mafft_linsi_BMGE
17_COG0064	17_COG0064_linsi_BMGE	COG0064	J	Asp-tRNAAsn/Glu-tRNAGln_amidotransferase_B_subunit	Aminoacyl-tRNA_synthetases	GatB	petitjean_M064R_b			petitjean_M064R_b	502	166	13.9	225	44.8	5	25	30	17_COG0064_mafft_linsi_BMGE			17_COG0064_mafft_linsi_BMGE
21_COG0081	21_COG0081_linsi_BMGE	COG0081	J	Ribosomal_protein_L1	Ribosome_50S_subunit	RplA		williams_27	coleman_AB21	williams_27;coleman_AB21	655	166	24.7	251	38.3	24	12	36	21_COG0081_mafft_linsi_BMGE			21_COG0081_mafft_linsi_BMGE
23_COG0085	23_COG0085_linsi_BMGE	COG0085	K	DNA-directed_RNA_polymerase,_beta_subunit/140_kD_subunit	RNA_polymerase	RpoB		williams_7	coleman_AB1	williams_7;coleman_AB1	672	189	10.6	241	35.9	1	6	7	23_COG0085_mafft_linsi_BMGE	23_COG0085_mafft_linsi_BMGE	23_COG0085_mafft_linsi_BMGE
24_COG0086	24_COG0086_linsi_BMGE	COG0086	K	DNA-directed_RNA_polymerase,_beta'_subunit/160_kD_subunit	RNA_polymerase	RpoC		williams_18;williams_36		williams_18;williams_36	674	195	10.8	234	34.7	2	4	6	24_COG0086_mafft_linsi_BMGE	24_COG0086_mafft_linsi_BMGE	24_COG0086_mafft_linsi_BMGE
25_COG0087	25_COG0087_linsi_BMGE	COG0087	J	Ribosomal_protein_L3	Ribosome_50S_subunit	RplC			coleman_AB11	coleman_AB11	677	179	24	264	39	22	13	35	25_COG0087_mafft_linsi_BMGE			25_COG0087_mafft_linsi_BMGE
26_COG0090	26_COG0090_linsi_BMGE	COG0090	J	Ribosomal_protein_L2	Ribosome_50S_subunit	RplB		williams_29	coleman_AB14	williams_29;coleman_AB14	675	189	18	269	39.9	11	15	26	26_COG0090_mafft_linsi_BMGE	26_COG0090_mafft_linsi_BMGE		26_COG0090_mafft_linsi_BMGE
27_COG0091	27_COG0091_linsi_BMGE	COG0091	J	Ribosomal_protein_L22	Ribosome_50S_subunit	RplV		williams_38		williams_38	670	189	27.5	337	50.3	26	27	53	27_COG0091_mafft_linsi_BMGE			27_COG0091_mafft_linsi_BMGE	27_COG0091_mafft_linsi_BMGE
28_COG0092	28_COG0092_linsi_BMGE	COG0092	J	Ribosomal_protein_S3	Ribosome_30S_subunit	RpsC		williams_3		williams_3	675	189	16.4	258	38.2	8	11	19	28_COG0092_mafft_linsi_BMGE	28_COG0092_mafft_linsi_BMGE
29_COG0093	29_COG0093_linsi_BMGE	COG0093	J	Ribosomal_protein_L14	Ribosome_50S_subunit	RplN		williams_12	coleman_AB27	williams_12;coleman_AB27	683	187	18.2	278	40.7	13	16	29	29_COG0093_mafft_linsi_BMGE			29_COG0093_mafft_linsi_BMGE
30_COG0094	30_COG0094_linsi_BMGE	COG0094	J	Ribosomal_protein_L5	Ribosome_50S_subunit	RplE		williams_2	coleman_AB24	williams_2;coleman_AB24	685	187	19.3	288	42	15	19	34	30_COG0094_mafft_linsi_BMGE			30_COG0094_mafft_linsi_BMGE
31_COG0096	31_COG0096_linsi_BMGE	COG0096	J	Ribosomal_protein_S8	Ribosome_30S_subunit	RpsH		williams_9	coleman_AB29	williams_9;coleman_AB29	681	180	25.6	287	42.1	25	20	45	31_COG0096_mafft_linsi_BMGE			31_COG0096_mafft_linsi_BMGE	31_COG0096_mafft_linsi_BMGE
33_COG0098	33_COG0098_linsi_BMGE	COG0098	J	Ribosomal_protein_S5	Ribosome_30S_subunit	RpsE		williams_24	coleman_AB15	williams_24;coleman_AB15	677	183	18.6	248	36.6	14	8	22	33_COG0098_mafft_linsi_BMGE	33_COG0098_mafft_linsi_BMGE
34_COG0099	34_COG0099_linsi_BMGE	COG0099	J	Ribosomal_protein_S13	Ribosome_30S_subunit	RpsM		williams_23	coleman_AB20	williams_23;coleman_AB20	680	183	27.9	299	44	27	24	51	34_COG0099_mafft_linsi_BMGE			34_COG0099_mafft_linsi_BMGE	34_COG0099_mafft_linsi_BMGE
35_COG0100	35_COG0100_linsi_BMGE	COG0100	J	Ribosomal_protein_S11	Ribosome_30S_subunit	RpsK		williams_17	coleman_AB26	williams_17;coleman_AB26	679	185	20.5	313	46.1	19	26	45	35_COG0100_mafft_linsi_BMGE			35_COG0100_mafft_linsi_BMGE	35_COG0100_mafft_linsi_BMGE
37_COG0103	37_COG0103_linsi_BMGE	COG0103	J	Ribosomal_protein_S9	Ribosome_30S_subunit	RpsI		williams_1		williams_1	677	185	24.3	291	43	23	22	45	37_COG0103_mafft_linsi_BMGE			37_COG0103_mafft_linsi_BMGE	37_COG0103_mafft_linsi_BMGE
52_COG0201	52_COG0201_linsi_BMGE	COG0201	U	Preprotein_translocase_subunit_SecY		SecY		williams_8	coleman_AB7	williams_8;coleman_AB7	671	191	12	245	36.5	3	7	10	52_COG0201_mafft_linsi_BMGE	52_COG0201_mafft_linsi_BMGE	52_COG0201_mafft_linsi_BMGE
53_COG0202	53_COG0202_linsi_BMGE	COG0202	K	DNA-directed_RNA_polymerase,_alpha_subunit/40_kD_subunit	RNA_polymerase	RpoA		williams_42		williams_42	672	192	20.3	289	43	18	23	41	53_COG0202_mafft_linsi_BMGE			53_COG0202_mafft_linsi_BMGE	53_COG0202_mafft_linsi_BMGE
67_COG0480	67_COG0480_linsi_BMGE	COG0480	J	Translation_elongation_factor_EF-G,_a_GTPase	Translation_factors	FusA		williams_4	coleman_AB2	williams_4;coleman_AB2	673	196	15.3	277	41.2	7	18	25	67_COG0480_mafft_linsi_BMGE	67_COG0480_mafft_linsi_BMGE
75_COG0532	75_COG0532_linsi_BMGE	COG0532	J	Translation_initiation_factor_IF-2,_a_GTPase	Translation_factors	InfB		williams_26		williams_26	662	186	12.4	237	35.8	4	5	9	75_COG0532_mafft_linsi_BMGE	75_COG0532_mafft_linsi_BMGE	75_COG0532_mafft_linsi_BMGE
76_COG0533	76_COG0533_linsi_BMGE	COG0533	J	tRNA_A37_threonylcarbamoyltransferase_TsaD	tRNA_modification	TsaD	petitjean_M010R_b	williams_10		petitjean_M010R_b;williams_10	664	186	21	272	41	20	17	37	76_COG0533_mafft_linsi_BMGE			76_COG0533_mafft_linsi_BMGE	76_COG0533_mafft_linsi_BMGE
78_COG0541	78_COG0541_linsi_BMGE	COG0541	U	Signal_recognition_particle_GTPase		Ffh	petitjean_M028R_b	williams_5		petitjean_M028R_b;williams_5	618	141	17.7	194	31.4	10	2	12	78_COG0541_mafft_linsi_BMGE	78_COG0541_mafft_linsi_BMGE	78_COG0541_mafft_linsi_BMGE
79_COG0552	79_COG0552_linsi_BMGE	COG0552	U	Signal_recognition_particle_GTPase_FtsY		FtsY	petitjean_MA23R_b	williams_16		petitjean_MA23R_b;williams_16	614	140	22.1	211	34.4	21	3	24	79_COG0552_mafft_linsi_BMGE	79_COG0552_mafft_linsi_BMGE
95_COG5257	95_COG5257_linsi_BMGE	COG5257	J	Translation_initiation_factor_2,_gamma_subunit_(eIF-2gamma;_GTPase)	Translation_factors	GCD11		williams_48		williams_48	356	77	19.5	98	27.5	17	1	18	95_COG5257_mafft_linsi_BMGE	95_COG5257_mafft_linsi_BMGE	95_COG5257_mafft_linsi_BMGE

## Sheet: 27Worst_Arc1Bac0_stats_summary
MarkerID	Marker_filename	COG	COG_Category	COG_description	COG_process	Gene	NonRibosomal_Petitjean_markers	Core_Williams_markers	Bacterial_Coleman_markers	Overlap_markers	NrSpecies	NrClusters.x	SplitsPerCluster	TotalSplits	TotalSplits_to_Species	RankA	RankB	RankA_B	FullSet	best_50perc	best_25perc	worst_50perc	worst_25perc
02_COG0008	02_COG0008_linsi_BMGE	COG0008	J	Glutamyl-_or_glutaminyl-tRNA_synthetase	Heme_biosynthesis	GlnS		williams_51		williams_51	662	154	23.4	268	40.5	3	5	8	02_COG0008_mafft_linsi_BMGE	02_COG0008_mafft_linsi_BMGE	02_COG0008_mafft_linsi_BMGE
03_COG0012	03_COG0012_linsi_BMGE	COG0012	J	Ribosome-binding_ATPase_YchF,_GTP1/OBG_family		GTP1			coleman_AB8	coleman_AB8	675	153	28.8	298	44.1	11	14	25	03_COG0012_mafft_linsi_BMGE	03_COG0012_mafft_linsi_BMGE
07_COG0024	07_COG0024_linsi_BMGE	COG0024	J	Methionine_aminopeptidase		Map		williams_32		williams_32	658	157	26.1	270	41	5	6	11	07_COG0024_mafft_linsi_BMGE	07_COG0024_mafft_linsi_BMGE	07_COG0024_mafft_linsi_BMGE
11_COG0048	11_COG0048_linsi_BMGE	COG0048	J	Ribosomal_protein_S12	Ribosome_30S_subunit	RpsL		williams_6		williams_6	672	154	27.9	296	44	8	13	21	11_COG0048_mafft_linsi_BMGE	11_COG0048_mafft_linsi_BMGE
19_COG0072	19_COG0072_linsi_BMGE	COG0072	J	Phenylalanyl-tRNA_synthetase_beta_subunit	Aminoacyl-tRNA_synthetases	PheT		williams_25		williams_25	647	144	26.4	236	36.5	6	1	7	19_COG0072_mafft_linsi_BMGE	19_COG0072_mafft_linsi_BMGE	19_COG0072_mafft_linsi_BMGE
20_COG0080	20_COG0080_linsi_BMGE	COG0080	J	Ribosomal_protein_L11	Ribosome_50S_subunit	RplK		williams_33		williams_33	670	150	31.3	278	41.5	17	9	26	20_COG0080_mafft_linsi_BMGE	20_COG0080_mafft_linsi_BMGE
32_COG0097	32_COG0097_linsi_BMGE	COG0097	J	Ribosomal_protein_L6P/L9E	Ribosome_50S_subunit	RplF		williams_43	coleman_AB23	williams_43;coleman_AB23	684	155	28.4	286	41.8	10	10	20	32_COG0097_mafft_linsi_BMGE	32_COG0097_mafft_linsi_BMGE
36_COG0102	36_COG0102_linsi_BMGE	COG0102	J	Ribosomal_protein_L13	Ribosome_50S_subunit	RplM		williams_13	coleman_AB25	williams_13;coleman_AB25	676	150	36.7	326	48.2	22	24	46	36_COG0102_mafft_linsi_BMGE			36_COG0102_mafft_linsi_BMGE	36_COG0102_mafft_linsi_BMGE
40_COG0127	40_COG0127_linsi_BMGE	COG0127	F	Inosine/xanthosine_triphosphate_pyrophosphatase,_all-alpha_NTP-PPase_family		RdgB	petitjean_M158R_b			petitjean_M158R_b	588	119	42.9	281	47.8	27	21	48	40_COG0127_mafft_linsi_BMGE			40_COG0127_mafft_linsi_BMGE	40_COG0127_mafft_linsi_BMGE
41_COG0130	41_COG0130_linsi_BMGE	COG0130	J	tRNA_U55_pseudouridine_synthase_TruB,_may_also_work_on_U342_of_tmRNA	tRNA_modification	TruB		williams_37		williams_37	627	133	30.1	285	45.5	14	18	32	41_COG0130_mafft_linsi_BMGE			41_COG0130_mafft_linsi_BMGE
43_COG0149	43_COG0149_linsi_BMGE	COG0149	G	Triosephosphate_isomerase	Glycolysis	TpiA			coleman_AB18	coleman_AB18	619	143	29.4	280	45.2	12	17	29	43_COG0149_mafft_linsi_BMGE			43_COG0149_mafft_linsi_BMGE
45_COG0164	45_COG0164_linsi_BMGE	COG0164	L	Ribonuclease_HII		RnhB		williams_45		williams_45	656	139	41.7	314	47.9	26	22	48	45_COG0164_mafft_linsi_BMGE			45_COG0164_mafft_linsi_BMGE	45_COG0164_mafft_linsi_BMGE
46_COG0180	46_COG0180_linsi_BMGE	COG0180	J	Tryptophanyl-tRNA_synthetase	Aminoacyl-tRNA_synthetases	TrpS		williams_49		williams_49	684	156	38.5	353	51.6	24	25	49	46_COG0180_mafft_linsi_BMGE			46_COG0180_mafft_linsi_BMGE	46_COG0180_mafft_linsi_BMGE
48_COG0185	48_COG0185_linsi_BMGE	COG0185	J	Ribosomal_protein_S19	Ribosome_30S_subunit	RpsS		williams_11	coleman_AB28	williams_11;coleman_AB28	674	147	31.3	286	42.4	18	11	29	48_COG0185_mafft_linsi_BMGE			48_COG0185_mafft_linsi_BMGE
49_COG0186	49_COG0186_linsi_BMGE	COG0186	J	Ribosomal_protein_S17	Ribosome_30S_subunit	RpsQ		williams_40		williams_40	683	151	27.8	314	46	7	19	26	49_COG0186_mafft_linsi_BMGE	49_COG0186_mafft_linsi_BMGE
50_COG0197	50_COG0197_linsi_BMGE	COG0197	J	Ribosomal_protein_L16/L10AE	Ribosome_50S_subunit	RplP		williams_41	coleman_AB22	williams_41;coleman_AB22	672	156	25.6	276	41.1	4	7	11	50_COG0197_mafft_linsi_BMGE	50_COG0197_mafft_linsi_BMGE	50_COG0197_mafft_linsi_BMGE
51_COG0198	51_COG0198_linsi_BMGE	COG0198	J	Ribosomal_protein_L24	Ribosome_50S_subunit	RplX		williams_39		williams_39	646	162	30.2	367	56.8	15	26	41	51_COG0198_mafft_linsi_BMGE			51_COG0198_mafft_linsi_BMGE
54_COG0214	54_COG0214_linsi_BMGE	COG0214	H	Pyridoxal_5'-phosphate_synthase_subunit_PdxS	Pyridoxal_phosphate_biosynthesis	PdxS	petitjean_M171R_b			petitjean_M171R_b	299	65	36.9	133	44.5	23	16	39	54_COG0214_mafft_linsi_BMGE			54_COG0214_mafft_linsi_BMGE
56_COG0258	56_COG0258_linsi_BMGE	COG0258	L	5'-3'_exonuclease_Xni/ExoIX_(flap_endonuclease)		ExoIX			coleman_AB10	coleman_AB10	666	152	28.3	245	36.8	9	2	11	56_COG0258_mafft_linsi_BMGE	56_COG0258_mafft_linsi_BMGE	56_COG0258_mafft_linsi_BMGE
57_COG0315	57_COG0315_linsi_BMGE	COG0315	H	Molybdenum_cofactor_biosynthesis_enzyme_MoaC	Molybdopterin_biosynthesis	MoaC	petitjean_MA53R_b			petitjean_MA53R_b	434	89	39.3	204	47	25	20	45	57_COG0315_mafft_linsi_BMGE			57_COG0315_mafft_linsi_BMGE	57_COG0315_mafft_linsi_BMGE
58_COG0343	58_COG0343_linsi_BMGE	COG0343	J	Queuine/archaeosine_tRNA-ribosyltransferase	tRNA_modification	Tgt	petitjean_M061R_b			petitjean_M061R_b	548	135	20.7	225	41.1	1	8	9	58_COG0343_mafft_linsi_BMGE	58_COG0343_mafft_linsi_BMGE	58_COG0343_mafft_linsi_BMGE
59_COG0391	59_COG0391_linsi_BMGE	COG0391	GH	Archaeal_2-phospho-L-lactate_transferase/Bacterial_gluconeogenesis_factor,_CofD/UPF0052_family		CofD	petitjean_M208R_b			petitjean_M208R_b	291	73	21.9	117	40.2	2	4	6	59_COG0391_mafft_linsi_BMGE	59_COG0391_mafft_linsi_BMGE	59_COG0391_mafft_linsi_BMGE
60_COG0409	60_COG0409_linsi_BMGE	COG0409	O	Hydrogenase_maturation_factor_HypD		HypD	petitjean_MA33R_b			petitjean_MA33R_b	241	74	36.5	140	58.1	21	27	48	60_COG0409_mafft_linsi_BMGE			60_COG0409_mafft_linsi_BMGE	60_COG0409_mafft_linsi_BMGE
62_COG0452	62_COG0452_linsi_BMGE	COG0452	H	Phosphopantothenoylcysteine_synthetase/decarboxylase_CoaBC	Pantothenate/CoA_biosynthesis	CoaBC	petitjean_M170R_b			petitjean_M170R_b	537	112	34.8	229	42.6	20	12	32	62_COG0452_mafft_linsi_BMGE			62_COG0452_mafft_linsi_BMGE
65_COG0468	65_COG0468_linsi_BMGE	COG0468	L	RecA/RadA_recombinase		RecA		williams_28	coleman_AB9	williams_28;coleman_AB9	685	148	30.4	264	38.5	16	3	19	65_COG0468_mafft_linsi_BMGE	65_COG0468_mafft_linsi_BMGE
68_COG0495	68_COG0495_linsi_BMGE	COG0495	J	Leucyl-tRNA_synthetase	Aminoacyl-tRNA_synthetases	LeuS		williams_50		williams_50	687	159	34	329	47.9	19	23	42	68_COG0495_mafft_linsi_BMGE			68_COG0495_mafft_linsi_BMGE	68_COG0495_mafft_linsi_BMGE
71_COG0522	71_COG0522_linsi_BMGE	COG0522	J	Ribosomal_protein_S4_or_related_protein	Ribosome_30S_subunit	RpsD		williams_44		williams_44	681	155	29.7	301	44.2	13	15	28	71_COG0522_mafft_linsi_BMGE	71_COG0522_mafft_linsi_BMGE		71_COG0522_mafft_linsi_BMGE

## Sheet: 27Worst_Arc1Bac3_stats_summary
MarkerID	Marker_filename	COG	COG_Category	COG_description	COG_process	Gene	NonRibosomal_Petitjean_markers	Core_Williams_markers	Bacterial_Coleman_markers	Overlap_markers	NrSpecies	NrClusters.x	SplitsPerCluster	TotalSplits	TotalSplits_to_Species	RankA	RankB	RankA_B	FullSet	best_50perc	best_25perc	worst_50perc	worst_25perc
02_COG0008	02_COG0008_linsi_BMGE	COG0008	J	Glutamyl-_or_glutaminyl-tRNA_synthetase	Heme_biosynthesis	GlnS		williams_51		williams_51	662	184	23.4	292	44.1	4	3	7	02_COG0008_mafft_linsi_BMGE	02_COG0008_mafft_linsi_BMGE	02_COG0008_mafft_linsi_BMGE
03_COG0012	03_COG0012_linsi_BMGE	COG0012	J	Ribosome-binding_ATPase_YchF,_GTP1/OBG_family		GTP1			coleman_AB8	coleman_AB8	675	182	25.3	307	45.5	8	10	18	03_COG0012_mafft_linsi_BMGE	03_COG0012_mafft_linsi_BMGE
07_COG0024	07_COG0024_linsi_BMGE	COG0024	J	Methionine_aminopeptidase		Map		williams_32		williams_32	658	188	24.5	296	45	6	6	12	07_COG0024_mafft_linsi_BMGE	07_COG0024_mafft_linsi_BMGE	07_COG0024_mafft_linsi_BMGE
11_COG0048	11_COG0048_linsi_BMGE	COG0048	J	Ribosomal_protein_S12	Ribosome_30S_subunit	RpsL		williams_6		williams_6	672	183	27.3	332	49.4	12	19	31	11_COG0048_mafft_linsi_BMGE			11_COG0048_mafft_linsi_BMGE
19_COG0072	19_COG0072_linsi_BMGE	COG0072	J	Phenylalanyl-tRNA_synthetase_beta_subunit	Aminoacyl-tRNA_synthetases	PheT		williams_25		williams_25	647	183	20.2	264	40.8	2	1	3	19_COG0072_mafft_linsi_BMGE	19_COG0072_mafft_linsi_BMGE	19_COG0072_mafft_linsi_BMGE
[truncated: 22 more rows]

## Sheet: Splitscore_ABlength_treelength
MarkerID	Marker_filename	COG	COG_Category	COG_description	COG_process	Gene	NonRibosomal_Petitjean_markers	Core_Williams_markers	Bacterial_Coleman_markers	Overlap_markers	Ribosomal	COG_Category.y	TotalSplits_to_Species_b0	TotalSplits_to_Speciesb3	avg_split_to_species	treelength	AB_length
[truncated: 54 more rows]

[truncated: 12 more sheets: Zhu_gtdb_ranks_9732taxa, gtdbtk.arcbac.r202.summary.meta, gtdb_tax_full_clade_definitions, names_to_replace_Arc1Bac0_final, names_to_replace_Domain_final, unique_clades, distribution_by_phylum, distribution_by_class, Arc1Bac0_Zhu_stats_summary, ArcBac_Domain_Zhu_stats_summary, ArcBac_Domain_Zhu_stats_sum_all, list_of_bad_markers_by_Domain]
